# Supplementary material for: Cell-Type–Specific Transcriptional Profiles of the Dimorphic Pathogen Penicillium marneffei Reflect Distinct Reproductive, Morphological, and Environmental Demands
Source: Oxford University Press journal article supplement (doi:10.1534/g3.113.006809), 2013-09-24
Supplement: 006809_figures1.pdf [file 006809_figures1.pdf]

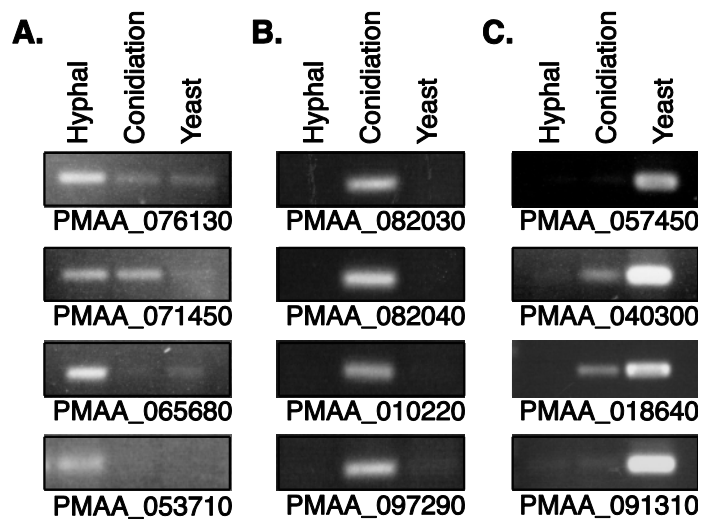

**Figure S1 Confirmation of differential gene expression.** The expression of a subset of differentially expressed genes identified in the microarray analysis was confirmed by RT PCR on RNA isolated from vegetative hyphae at 25° (A), asexual developing cultures at 25° (B) and from yeast cells at 37° (C). Genes shown are as follows: Hyphal specific; PMAA\_076130 meiosis induction protein kinase (Ime2), PMAA\_071450 hypothetical protein, PMAA\_065680 nucleoside-diphosphate-sugar epimerase, PMAA\_053710 hypothetical protein and PMAA\_018570 allergen Asp F3. Asexual development specific; PMAA\_082030 conidial pigment biosynthesis 1,3,6,8-tetrahydroxynaphthalene reductase Arp2, PMAA\_082040 conidial pigment biosynthesis scytalone dehydratase Arp1, PMAA\_010220 glutaminase GtaA, PMAA\_075300 C2H2 type conidiation transcription factor BrIA and PMAA\_097290 hypothetical protein. Yeast specific; PMAA\_057450 ferrooxidoreductase Fet3, PMAA\_040300 sodium P-type ATPase, PMAA\_018640 cytochrome P450 monooxygenase, PMAA\_031950 4-hydroxyphenylpyruvate dioxygenase and PMAA\_091310 hypothetical protein.
