# Supplementary material for: Cell-Type–Specific Transcriptional Profiles of the Dimorphic Pathogen Penicillium marneffei Reflect Distinct Reproductive, Morphological, and Environmental Demands
Source: G3 (Bethesda). 2013 Nov 1;3(11):1997–2014. doi: 10.1534/g3.113.006809 (PMC3815061; doi:10.1534/g3.113.006809)
Supplement: Supporting Information [file supp_g3.113.006809_TableS1.xls]

## Sheet: Sheet1
Table S1. Oligonucleotides used in this study
Description (P. marneffei ID)	Primer ID	Primer sequence (5' - 3')
M13	M13 F	GTTTTCCCAGTCACGAC
	M13 R	GCGGATAACAATTTCACACAGG
benA RT PCR	Y58	AGTTGTTACCAGCACCGGAC
	Y57	GCTCCGGTGTCTACAATGGC
ime2 RT PCR (PMAA_076130)	SS33	ATGGCTTGTCTTCGGCAG
	SS34	TTGTGACATCCCTTTGCC
hypothetical protein RT PCR (PMAA_071450)	SS35	ATGGCGGCTGTCAAGACC
	SS36	GCCTCTGTGCAATCTCGC
nucleoside-diphosphate-sugar epimerase RT PCR (PMAA_065680)	OO43	ATGCCTCTCGCCTCAAAACC
	OO44	GGAACGGCTCTCGGATAATG
hypothetical protein RT PCR (PMAA_053710)	DD1	TTATTGTTGGCATTGGCG
	DD2	AGACCGACATGATTCCCG
allergen Asp F3 RT PCR (PMAA_018570)	SS31	AAGGTGACCAGTTCCCCG
	SS32	CAGGCGCTCATGACGTAG
arp2 RT PCR (PMAA_082030)	OO35	CGGTATTGCCCTTGAACTCG
	OO36	TGTCGCCAAAATCAGCAGAG
arp1 RT PCR (PMAA_082040)	OO39	AGGTGGTTTTTGACTGGGCC
	OO40	CGGTTTTCAGGCTTGCGTCT
gtaA RT PCR (PMAA_010220)	OO41	CATTATCCCAACGCTACCGC
	OO42	ATAATCGTCGGCAATGGAGC
brlA RT PCR (PMAA_075300)	FF6	CATTCCCACAACCGATGACT
	FF7	CATACCTGGCGAGATCCACT
conserved hypothetical protein RT PCR (PMAA_097290)	OO37	ATCAGGCCGCCGAGGGTTTC
	OO38	GCAGCATTGACACCAGCACG
fetC RT PCR (PMAA_057450)	JJ55	CAAGGGTACGAGCAT
	JJ56	AGGTCCTCCATCATTTCGTG
sodium P-type ATPase RT PCR (PMAA_04030)	OO51	TTTCGAGGCGGATTTTGGAG
	OO52	TTGTGCATTTGAGTCATTCC
cytochrome P450 monooxygenase RT PCR (PMAA_018640)	DD3	ATCCATCCCCCGTGAAGC
	DD4	GCCGACACGAAGTGATCC
4-hydroxyphenylpyruvate dioxygenase RT PCR (PMAA_031950)	CC53	CGGTGCCGTACACAGGTATT
	CC54	TTGATTTCAGGGCGGAGTAG
ystA RT PCR (PMAA_091310)	CC51	AACAAACAAGGGCCAACAAG
	CC52	TTGCTCGAAGACGTGGAAG
Histone H4.2 RT-PCR	II13	GTGGAAAAGGCGGCAAAG
	II14	CCAACGAAGTCACGGTCT
Bst RT-PCR	II15	TCTGGTTCCTTGTTCCTTTG
	II16	CGAGGAAAATGGTGTCAACC
ystA coding region	AA50	GACTTGTTGAAAGACGGC
	AA51	GACTTGTTGAAAGACGGC
pyrG blaster split marker	AA52	CTTATCGGGCCGGAGCA
	AA53	ATCCTCGCTCTCCTCTTTCT
ystA 23c split marker	AA62	AAGGGTGAAGACTATCCACTTCTTCCAATCCC
ystA 2c3 split marker	AA63	TATGAGGGATTGGAAGAAGTGGATAGTGTTCA
ystA 67c split marker	AA64	CAGTCATGTCGTGTCGTTTTCATTAAGCATTC
ystA 76c split marker	AA65	GGCAGTGTGCTTAATGAAAACGACACGACATG
ystAORF1-GFP	GG73	ACATCGATTAATAG CAACACAAAGAGC
	EE71	TGAAGCTTAAGAGAGGGTTGGAGGAGATGG
ystAORF2-GFP	GG73	ACATCGATTAATAGCAACACAAAGAGC
	GG72	TAAAGCTTCTCAACGAAAACACAGTCCCC
ystAM(ORF1)1L invPCR	GG67	GAAGAAGTATATAAG GAGCTGTG
	GG68	CAATCCCTCAAAGACTTCG
ystAM(ORF2)1L invPCR	GG69	AATCACACACTGTTCGGTC
	GG70	TAAGAGAGGGTTGGAGGAGATG
ergM coding region	KK1	GGGCATGGTGATCCATTAGT
	KK2	CGATCTCAACAACATCCCTTT
ergM invPCR	KK25	AAAGGGTATCACGGAGCAAA
	KK26	CACGGGACATGTGTTTGAAG
ergA RT PCR	MM56	GAGGAGTGTGCCCAGGACTA
	MM57	GGGTTGAGGTTCTTGGGTTC
ergI RT PCR	MM54	TGCTTCCGCAATTATTCGAT
	MM55	TTCTCGATGCTACCACAAGC
ergL RT PCR	MM58	TCGACGCAGTCAATCTATGTG
	MM59	CGCCATACTTCTTGCGACA
ergM RT PCR	MM2	CCTAGTGGTCCCCCGAAT
	MM1	CCCTGCCTCTTCAAACACAT
ergN RT PCR	OO17	AACTTCCTCAGATCTGGCTCT
	OO18	AGCTCCATGGAAAATCGTAG
ergO RT PCR	OO19	GAGTATTACTCTGAGACAAAGGGA
	OO20	GGCGATCGAGTAAGTTCCAC
ergP RT PCR	OO21	ACAGGAGCCAATTCTGGTCT
	OO22	TACCCGAGTTTGAAGGTTGG
ergQ RT PCR	OO15	GCTACATTGACTGCCACTAC
	OO16	GGCGTAAACTGCGTCAAAAC
ergR RT PCR	OO9	GTACATTATTCACGCCAGTAT
	OO10	AATCTTGCCCTGCAACAAAT
ergS RT PCR	MM52	GCTGTCGCCAGCTCTTTC
	MM53	CCAAAAAGCCATGTGATCAAG
ergT RT PCR	OO13	CGGTTTTCCACAAGTTCGTT
	OO14	GCGATCTTCTTGACGGTTTC
ergU RT PCR	OO11	TGTATTATCTCGACTTGGGAC
	OO12	CCCAATTGAGCGCAAAGT
