# Supplementary material for: Cell-Type–Specific Transcriptional Profiles of the Dimorphic Pathogen Penicillium marneffei Reflect Distinct Reproductive, Morphological, and Environmental Demands
Source: G3 (Bethesda). 2013 Nov 1;3(11):1997–2014. doi: 10.1534/g3.113.006809 (PMC3815061; doi:10.1534/g3.113.006809)
Supplement: Supporting Information [file supp_g3.113.006809_TableS2.xls]

## Sheet: Phase-specific 401 genes
Table 2. Relative expression data for the three cell states.
Microarray ID	PMAA ID	Percentage of total expession
		Hyphal	Asexual	Yeast
DC_010A17	PMAA_086380_102_m008725	52	23	25
DC_010A8	PMAA_073270_100_m009627	53	25	22
DC_010B21	PMAA_089910_102_m009082	24	49	26
DC_010C14	PMAA_072760_100_m009576	29	15	55
DC_010C15	PMAA_065470_100_m008856	13	25	62
DC_010C19	PMAA_066510_100_m008961	22	30	48
DC_010C23	PMAA_042510_97_m006698	45	22	33
DC_010D11	PMAA_041190_97_m006566	63	24	12
DC_010D5	PMAA_010130_95_m004013	47	32	21
DC_010D7	PMAA_005360_93_m04538	47	19	35
DC_010E21	PMAA_093910_103_m007202	57	20	23
DC_010E4	PMAA_099880_103_m007811	47	20	33
DC_010E6	PMAA_096380_103_m007453	47	30	23
DC_010F17	PMAA_055990_99_m007111	57	22	20
DC_010F2	PMAA_084300_102_m008514	46	16	38
DC_010F9	PMAA_037440_96_m015671	44	19	38
DC_010G15	PMAA_021000_96_m014027	37	42	21
DC_010I23	PMAA_021140_96_m15843	46	23	32
DC_010L19	PMAA_049350_97_m007373	40	20	41
DC_010O2	PMAA_011520_95_m004150	25	31	44
DC_011A14	PMAA_005610_93_m04562	25	23	52
DC_011A15	PMAA_081090_102_m008193	58	22	20
DC_011A5	PMAA_066580_100_m008968	31	20	49
DC_011C4	PMAA_080010_102_m008084	20	29	51
DC_011C5	PMAA_018330_96_m013761	40	21	39
DC_011C7	PMAA_101530_103_m007979	7	79	14
DC_011C8	PMAA_100160_103_m007839	20	48	32
DC_011D23	PMAA_023300_96_m014255	44	30	27
DC_011D7	PMAA_087990_102_m008888	21	29	50
DC_011D8	PMAA_091290_103_m008067	10	40	50
DC_011E22	PMAA_031420_96_m015067	56	22	22
DC_011E5	PMAA_084280_102_m008513	52	8	40
DC_011F10	PMAA_014380_95_m004434	38	44	19
DC_011F9	PMAA_096670_103_m008105	16	56	29
DC_011G17	PMAA_059830_99_m007492	62	16	22
DC_011G18	PMAA_078410_102_m007920	42	33	24
DC_011G2	PMAA_019010_96_m013829	20	54	26
DC_011G24	PMAA_102310_103_m008063	19	36	45
DC_011G7	PMAA_069820_100_m009288	64	9	27
DC_011H15	PMAA_081680_102_m008253	24	54	22
DC_011H17	PMAA_017780_96_m013706	47	30	23
DC_011J22	PMAA_071690_100_m009472	54	19	27
DC_011J24	PMAA_092770_103_m007087	67	13	20
DC_011K9	PMAA_039540_97_m006404	46	24	30
DC_011L15	PMAA_068140_100_m009119	62	23	15
DC_011L4	PMAA_028880_96_m014814	64	16	20
DC_011N22	PMAA_045180_97_m006959	22	33	45
DC_011N5	PMAA_031950_96_m015121	4	7	89
DC_011N6	PMAA_033630_96_m015291	21	29	50
DC_011N8	PMAA_094650_103_m007277	52	19	28
DC_011O16	PMAA_054400_99_m006955	17	40	43
DC_011P1	PMAA_081560_102_m008241	12	25	63
DC_011P22	PMAA_084830_102_m008568	43	22	35
DC_011P6	PMAA_001740_93_m04172	51	25	24
DC_012B15	PMAA_065680_100_m008877	82	6	12
DC_012C10	PMAA_049950_97_m007433	52	23	25
DC_012C4	PMAA_079980_102_m008081	56	23	21
DC_012D7	PMAA_056120_99_m007124	15	71	14
DC_012F1	PMAA_017640_96_m013692	36	19	45
DC_012F12	PMAA_041760_97_m006624	11	52	37
DC_012F22	PMAA_015980_96_m013523	48	19	33
DC_012F3	PMAA_095250_103_m007338	8	59	34
DC_012F4	PMAA_039640_97_m006414	57	22	21
DC_012F5	PMAA_025880_96_m014511	22	34	44
DC_012G1	PMAA_094610_103_m007273	50	20	30
DC_012I5	PMAA_030170_96_m014941	47	21	32
DC_012J1	PMAA_035110_96_m015441	41	17	42
DC_012J17	PMAA_028330_96_m014757	51	22	27
DC_012J23	PMAA_011350_95_m004133	90	4	6
DC_012J23	PMAA_069010_100_m009206	90	4	6
DC_012J5	PMAA_092640_103_m007073	13	29	58
DC_012L10	PMAA_091660_103_m006977	50	23	27
DC_012L9	PMAA_025670_96_m014490	20	58	22
DC_012N2	PMAA_092720_103_m007082	72	8	20
DC_012P15	PMAA_059640_99_m007473	22	56	23
DC_012P22	PMAA_090390_103_m006852	12	22	66
DC_013A12	PMAA_101020_103_m007928	20	48	33
DC_013A18	PMAA_008220_94_m000369	16	47	38
DC_013A20	PMAA_082030_102_m008288	2	96	2
DC_013A22	PMAA_064600_100_m09993	54	21	25
DC_013A23	PMAA_064990_100_m008805	11	78	11
DC_013A6	PMAA_020890_96_m014016	13	73	14
DC_013B24	PMAA_002470_93_m04246	57	26	16
DC_013C23	PMAA_064620_100_m008767	56	8	36
DC_013D11	PMAA_019260_96_m013853	40	37	24
DC_013D24	PMAA_093380_103_m007148	44	40	17
DC_013D8	PMAA_040230_97_m006474	46	30	25
DC_013E17	PMAA_049550_97_m007393	21	60	19
DC_013E19	PMAA_082040_102_m009155	3	94	3
DC_013F12	PMAA_004750_93_m04477	19	30	51
DC_013F16	PMAA_080670_102_m008151	41	35	25
DC_013F21	PMAA_009130_95_m003912	44	22	34
DC_013F5	PMAA_063480_100_m008653	11	53	36
DC_013G1	PMAA_092900_103_m007100	45	19	36
DC_013G16	PMAA_054200_99_m006937	38	41	22
DC_013G3	PMAA_062740_100_m008578	32	47	21
DC_013G8	PMAA_006080_93_m04609	30	50	20
DC_013G9	PMAA_066120_100_m008922	67	13	20
DC_013H16	PMAA_046930_97_m07511	23	25	53
DC_013I21	PMAA_098380_103_m007655	68	13	19
DC_013I8	PMAA_017080_96_m013636	26	15	58
DC_013K11	PMAA_063100_100_m008615	4	93	3
DC_013K17	PMAA_079130_102_m007995	19	38	43
DC_013K4	PMAA_080130_102_m008096	25	53	22
DC_013O1	PMAA_063790_100_m008684	56	21	23
DC_013O16	PMAA_005510_93_m04552	54	32	14
DC_013O9	PMAA_071760_100_m10039	78	9	13
DC_014C18	PMAA_041270_97_m006575	39	17	44
DC_014C20	PMAA_037620_96_m015689	18	19	63
DC_014E18	PMAA_057320_99_m007242	47	19	34
DC_014L11	PMAA_006650_93_m04666	43	35	22
DC_014L14	PMAA_040640_97_m006515	44	17	39
DC_014N20	PMAA_042280_97_m006676	53	21	26
DC_014N7	PMAA_002910_93_m04290	13	37	50
DC_014O12	PMAA_055540_99_m007066	48	26	27
DC_014O24	PMAA_094890_103_m007302	11	31	59
DC_01A15	PMAA_007900_94_m000328	22	47	31
DC_01A6	PMAA_024740_96_m014398	67	22	12
DC_01B9	PMAA_078310_102_m007910	18	18	65
DC_01C6	PMAA_038320_96_m015758	39	11	51
DC_01E15	PMAA_075300_100_m009828	3	91	7
DC_01E18	PMAA_021910_96_m014118	21	46	33
DC_01F15	PMAA_066040_100_m008914	15	66	19
DC_01F4	PMAA_071070_100_m009414	46	22	32
DC_01F6	PMAA_029990_96_m014923	24	51	24
DC_01G18	PMAA_009820_95_m003981	4	13	83
DC_01G4	PMAA_028140_96_m014738	46	26	29
DC_01H11	PMAA_024900_96_m014414	65	16	19
DC_01H15	PMAA_050700_99_m006588	46	27	26
DC_01H18	PMAA_088690_102_m008959	86	5	9
DC_01H9	PMAA_001470_93_m04145	27	60	13
DC_01I1	PMAA_035040_96_m015434	17	14	69
DC_01J3	PMAA_075640_100_m009863	19	58	23
DC_01K11	PMAA_017430_96_m013671	29	21	50
DC_01K6	PMAA_055410_99_m007053	80	5	14
DC_01L15	PMAA_010280_95_m004028	58	15	27
DC_01L19	PMAA_076310_100_m10061	48	27	24
DC_01L20	PMAA_091940_103_m007002	45	17	37
DC_01M20	PMAA_073320_100_m009632	63	16	21
DC_01N14	PMAA_079710_102_m008054	16	55	29
DC_01N15	PMAA_013650_95_m004362	17	28	55
DC_01N19	PMAA_052600_99_m006776	57	23	20
DC_01N4	PMAA_047990_97_m007244	16	34	50
DC_01O18	PMAA_015360_96_m013459	8	41	51
DC_01P15	PMAA_036400_96_m015569	30	48	22
DC_02A1	PMAA_016130_96_m013538	14	29	57
DC_02A5	PMAA_041990_97_m006646	47	30	23
DC_02A9	PMAA_045900_97_m007032	12	77	11
DC_02B12	PMAA_007740_93_m04824	20	60	20
DC_02B16	PMAA_060200_99_m007527	21	49	29
DC_02B4	PMAA_028110_96_m014734	22	17	61
DC_02B4	PMAA_028110_96_m014734	22	17	61
DC_02C18	PMAA_022690_96_m014196	19	62	19
DC_02C22	PMAA_038970_97_m006346	20	33	47
DC_02C6	PMAA_075980_100_m009897	39	9	52
DC_02D1	PMAA_076130_100_m009912	77	13	11
DC_02D12	PMAA_091380_103_m006948	21	56	24
DC_02D18	PMAA_046420_97_m007085	71	15	14
DC_02D21	PMAA_097060_103_m007522	17	28	55
DC_02D23	PMAA_081600_102_m008245	50	35	15
DC_02D24	PMAA_055980_99_m007110	17	49	33
DC_02E12	PMAA_021280_96_m014055	41	7	52
DC_02E16	PMAA_091310_103_m006941	3	4	94
DC_02E21	PMAA_070380_100_m009343	50	37	13
DC_02F17	PMAA_034920_96_m015422	19	66	15
DC_02F18	PMAA_035660_96_m015496	13	49	37
DC_02F2	PMAA_086150_102_m008701	10	81	9
DC_02F21	PMAA_080980_102_m008182	79	14	7
DC_02G15	PMAA_045960_97_m007038	40	51	9
DC_02H24	PMAA_052210_99_m006737	77	9	14
DC_02H3	PMAA_013400_95_m004339	48	23	29
DC_02I2	PMAA_082620_102_m008349	10	80	10
DC_02I20	PMAA_029890_96_m014913	53	23	23
DC_02I7	PMAA_084230_102_m008507	23	46	31
DC_02J17	PMAA_095560_103_m007370	10	80	10
DC_02J21	PMAA_053000_99_m006816	26	28	46
DC_02J22	PMAA_047000_97_m007145	12	78	10
DC_02L15	PMAA_076660_100_m009964	22	31	47
DC_02L17	PMAA_029640_96_m014888	47	29	24
DC_02L9	PMAA_054370_99_m006952	38	43	20
DC_02N8	PMAA_035770_96_m015506	22	41	36
DC_02O7	PMAA_040020_97_m006453	61	15	24
DC_02P17	PMAA_040090_97_m006460	29	16	55
DC_02P2	PMAA_023440_96_m014269	22	53	25
DC_03A17	PMAA_059560_99_m007465	35	51	15
DC_03B24	PMAA_054650_99_m006980	25	55	20
DC_03B5	PMAA_015960_96_m013521	47	41	12
DC_03B7	PMAA_065120_100_m008818	36	42	22
DC_03C24	PMAA_076680_100_m009966	21	55	24
DC_03C3	PMAA_036120_96_m015541	13	34	53
DC_03D5	PMAA_028730_96_m15917	24	6	69
DC_03D9	PMAA_004490_93_m04451	33	11	56
DC_03E8	PMAA_093480_103_m007158	44	17	38
DC_03F11	PMAA_060900_99_m007597	53	22	25
DC_03F21	PMAA_094330_103_m007245	10	26	64
DC_03F23	PMAA_035470_96_m015477	48	26	26
DC_03F6	PMAA_042130_97_m07473	28	52	20
DC_03G11	PMAA_045600_97_m007000	14	75	11
DC_03G14	PMAA_027300_96_m014652	29	51	20
DC_03G24	PMAA_004760_93_m04478	44	35	22
DC_03G4	PMAA_041520_97_m006600	44	15	41
DC_03G9	PMAA_017720_96_m013700	46	33	21
DC_03H4	PMAA_020080_96_m013935	51	17	32
DC_03I2	PMAA_020160_96_m013943	49	22	30
DC_03I4	PMAA_003920_93_m04393	47	26	27
DC_03I7	PMAA_093350_103_m007145	68	22	11
DC_03J11	PMAA_066300_100_m008940	10	78	12
DC_03J20	PMAA_071630_100_m009466	56	20	24
DC_03K10	PMAA_027290_96_m014651	4	59	37
DC_03K12	PMAA_065540_100_m008863	59	20	20
DC_03K16	PMAA_102470_104_m000290	20	36	44
DC_03K2	PMAA_041840_97_m006631	21	59	19
DC_03K21	PMAA_078940_102_m007976	6	11	83
DC_03L15	PMAA_012920_95_m004291	77	8	15
DC_03L19	PMAA_065440_100_m008853	52	17	31
DC_03N2	PMAA_098430_103_m007660	44	35	21
DC_03N22	PMAA_080350_102_m008118	51	29	21
DC_03O13	PMAA_041320_97_m006580	16	67	17
DC_03O14	PMAA_054240_99_m006941	44	40	15
DC_03O2	PMAA_032300_96_m015156	70	10	20
DC_03O8	PMAA_004050_93_m04405	13	18	69
DC_03P21	PMAA_006690_93_m04670	21	56	23
DC_03P3	PMAA_007760_93_m04781	24	31	45
DC_04E10	PMAA_076380_100_m009937	22	46	32
DC_04F22	PMAA_009150_95_m003914	52	24	24
DC_04G10	PMAA_095670_103_m007382	12	77	12
DC_04G13	PMAA_070190_100_m009324	43	38	19
DC_04H10	PMAA_049040_97_m007342	17	66	17
DC_04I6	PMAA_060150_99_m007524	26	49	26
DC_04K22	PMAA_078420_102_m007921	49	29	22
DC_04N2	PMAA_040300_97_m006481	2	14	84
DC_04O10	PMAA_100150_103_m007838	7	20	74
DC_04O14	PMAA_070510_100_m009356	23	32	45
DC_04O20	PMAA_043060_97_m006751	53	22	26
DC_05A13	PMAA_000780_93_m04073	24	34	42
DC_05A17	PMAA_089000_102_m008991	50	25	25
DC_05A3	PMAA_018640_96_m013792	1	3	96
DC_05A7	PMAA_084700_102_m008555	28	25	46
DC_05B15	PMAA_039810_97_m006432	48	19	34
DC_05B4	PMAA_039850_97_m006436	49	36	15
DC_05B7	PMAA_032350_96_m015161	53	5	42
DC_05C15	PMAA_057640_99_m007274	9	81	10
DC_05C3	PMAA_053710_99_m006887	87	7	6
DC_05C7	PMAA_002930_93_m04292	12	54	34
DC_05D1	PMAA_059270_99_m007436	29	50	22
DC_05D13	PMAA_087420_102_m008831	49	26	24
DC_05E18	PMAA_100870_103_m007913	13	74	13
DC_05E21	PMAA_036000_96_m015529	55	17	27
DC_05E24	PMAA_075860_100_m009885	23	47	30
DC_05E5	PMAA_025700_96_m014493	4	92	3
DC_05F10	PMAA_008200_94_m000365	18	46	36
DC_05F19	PMAA_080560_102_m008140	36	15	49
DC_05F21	PMAA_073640_100_m009664	33	55	12
DC_05F22	PMAA_040210_97_m006472	31	53	15
DC_05F9	PMAA_075990_100_m009898	14	11	75
DC_05G4	PMAA_051480_99_m006664	2	37	61
DC_05G6	PMAA_053530_99_m006869	19	37	44
DC_05H4	PMAA_057450_99_m007255	6	4	90
DC_05H7	PMAA_020770_96_m014004	27	20	53
DC_05I13	PMAA_024520_96_m014376	13	16	72
DC_05I15	PMAA_041330_97_m006581	44	23	32
DC_05I19	PMAA_039120_97_m006362	12	78	10
DC_05I21	PMAA_005580_93_m04559	24	17	58
DC_05J1	PMAA_039930_97_m006444	61	19	20
DC_05J2	PMAA_090730_103_m006885	38	21	41
DC_05J6	PMAA_062210_100_m008519	23	43	34
DC_05K12	PMAA_058480_99_m007356	17	70	14
DC_05K15	PMAA_021820_96_m014109	20	62	18
DC_05K17	PMAA_071450	74	19	7
DC_05K6	PMAA_102650_104_m00335	25	22	53
DC_05L2	PMAA_084450_102_m008530	20	62	18
DC_05L23	PMAA_077810_102_m007860	46	29	25
DC_05N16	PMAA_022080_96_m014135	29	23	48
DC_05N4	PMAA_077060_102_m007784	8	80	12
DC_05O10	PMAA_057560_99_m007266	73	6	20
DC_05O11	PMAA_044710_97_m006914	34	21	44
DC_05O13	PMAA_010220_95_m004022	2	94	3
DC_05O15	PMAA_040890_97_m006536	21	28	52
DC_05O24	PMAA_082600_102_m008347	16	33	51
DC_05O9	PMAA_019030_96_m013831	41	17	42
DC_05P11	PMAA_065580_100_m008867	28	7	64
DC_05P19	PMAA_066490_100_m008959	12	20	68
DC_06A2	PMAA_084740_102_m008559	53	18	29
DC_06A22	PMAA_057360_99_m007246	39	43	18
DC_06B23	PMAA_038990_97_m006348	67	18	16
DC_06B24	PMAA_041170_97_m006564	44	31	25
DC_06C16	PMAA_074840_100_m009783	21	29	50
DC_06C17	PMAA_024760_96_m15866	32	8	61
DC_06C20	PMAA_089220_102_m009012	59	14	27
DC_06C23	PMAA_052080_99_m006724	58	22	20
DC_06D19	PMAA_070290_100_m009334	44	33	23
DC_06D21	PMAA_063000_100_m008605	29	27	44
DC_06E11	PMAA_013020_95_m004301	59	29	12
DC_06E16	PMAA_078660_102_m007945	22	59	19
DC_06E2	PMAA_092050_103_m007013	47	23	30
DC_06F11	PMAA_044270_97_m006870	55	30	15
DC_06F12	PMAA_006540_93_m04655	24	33	43
DC_06F16	PMAA_020560_96_m013983	9	81	10
DC_06F24	PMAA_101620_103_m007988	17	63	20
DC_06G14	PMAA_067490_100_m009053	53	21	26
DC_06G15	PMAA_030620_96_m014988	48	23	29
DC_06G18	PMAA_092380_103_m007046	11	28	61
DC_06G20	PMAA_037600_96_m015687	53	28	19
DC_06G8	PMAA_091840_103_m006992	65	16	18
DC_06H1	PMAA_066500_100_m008960	26	25	49
DC_06H22	PMAA_088670_102_m008957	24	21	55
DC_06I16	PMAA_050290_99_m006545	14	49	36
DC_06J11	PMAA_036890_96_m015616	23	39	38
DC_06J24	PMAA_097290_103_m007545	6	89	6
DC_06K12	PMAA_005310_93_m04533	51	26	23
DC_06K13	PMAA_082670_102_m008354	47	29	24
DC_06K2	PMAA_049510_97_m007389	4	89	7
DC_06K21	PMAA_040470_97_m006499	7	19	74
DC_06L1	PMAA_041070_97_m006554	24	22	54
DC_06L14	PMAA_041410_97_m006589	40	48	12
DC_06N15	PMAA_058210_99_m007329	21	40	39
DC_06N19	PMAA_044650_97_m006908	20	11	70
DC_06N7	PMAA_035260_96_m015456	29	15	56
DC_06O22	PMAA_022840_96_m014211	37	48	14
DC_06O3	PMAA_015260_95_m004522	27	25	48
DC_06O4	PMAA_016000_96_m013525	32	21	47
DC_06P22	PMAA_045500_97_m006990	46	20	35
DC_06P3	PMAA_019390_96_m013866	52	24	24
DC_07A24	PMAA_039450_97_m006395	24	21	56
DC_07B18	PMAA_028120_96_m014736	25	23	52
DC_07B22	PMAA_085430_102_m008628	59	12	29
DC_07C14	PMAA_065590_100_m008868	31	13	56
DC_07D12	PMAA_053860_99_m006903	54	23	23
DC_07D22	PMAA_071490_100_m009452	9	17	74
DC_07E14	PMAA_075290_100_m009827	21	59	20
DC_07E21	PMAA_011150_95_m004114	82	4	14
DC_07F14	PMAA_059370_99_m007446	9	81	10
DC_07F23	PMAA_019770_96_m013904	23	37	40
DC_07G10	PMAA_099540_103_m007777	28	51	21
DC_07I22	PMAA_069900_100_m009296	61	12	27
DC_07I3	PMAA_091960_103_m007004	36	40	24
DC_07I9	PMAA_007590_93_m04762	15	18	68
DC_07K18	PMAA_093920_103_m007203	18	30	52
DC_07K21	PMAA_096820_103_m007497	62	25	13
DC_07K3	PMAA_015910_96_m013516	48	26	26
DC_07K4	PMAA_017130_96_m013641	21	30	49
DC_07L20	PMAA_031980_96_m015124	14	16	70
DC_07M14	PMAA_071020_100_m009409	47	30	23
DC_07M5	PMAA_010380_95_m004038	36	62	3
DC_07M7	PMAA_032450_96_m015170	41	46	13
DC_07N4	PMAA_056390_99_m007151	71	19	10
DC_07N6	PMAA_000930_93_m04089	21	39	40
DC_07O19	PMAA_040700_97_m006521	20	18	62
DC_07O20	PMAA_086650_102_m008752	49	18	33
DC_07P18	PMAA_021380_96_m014065	19	17	64
DC_08B12	PMAA_074240_100_m009724	26	11	63
DC_08D11	PMAA_040500_97_m006502	23	45	32
DC_08E17	PMAA_082150_102_m008300	46	21	33
DC_08E4	PMAA_083630_102_m008449	50	15	35
DC_08F11	PMAA_051100_99_m006628	24	51	25
DC_08F12	PMAA_054570_99_m006972	45	12	43
DC_08F21	PMAA_047890_97_m007233	15	56	29
DC_08F22	PMAA_054360_99_m006951	60	18	23
DC_08F3	PMAA_072140_100_m009514	55	17	29
DC_08H20	PMAA_014440_95_m004440	50	15	35
DC_08H3	PMAA_015680_96_m013493	50	9	41
DC_08H9	PMAA_007780_93_m04783	20	41	39
DC_08I13	PMAA_032960_96_m015222	55	20	25
DC_08J15	PMAA_096860_103_m007502	17	71	12
DC_08J24	PMAA_102280_103_m008060	20	36	44
DC_08J5	PMAA_017210_96_m013649	20	43	37
DC_08K10	PMAA_081450_102_m008230	56	22	22
DC_08K11	PMAA_093360_103_m007146	45	31	24
DC_08L17	PMAA_079340_102_m008016	22	23	55
DC_08L22	PMAA_037580_96_m015685	25	25	50
DC_08L5	PMAA_051360_99_m006654	49	26	25
DC_08N15	PMAA_008830_95_m003882	20	28	52
DC_08N9	PMAA_058900_99_m007398	15	7	77
DC_08O12	PMAA_074300_100_m009730	17	45	38
DC_08O19	PMAA_012160_95_m004214	19	62	19
DC_08O2	PMAA_068520_100_m009157	74	14	12
DC_08O22	PMAA_059970_99_m007506	13	71	15
DC_08P15	PMAA_020600_96_m15841	16	20	64
DC_08P2	PMAA_041380_97_m006586	42	21	37
DC_08P22	PMAA_060070_99_m007516	50	34	16
DC_08P7	PMAA_002420_93_m04241	31	14	55
DC_09A21	PMAA_019810_96_m013908	45	11	43
DC_09A24	PMAA_058520_99_m007360	18	24	58
DC_09A9	PMAA_016400_96_m013565	5	88	7
DC_09B14	PMAA_085050_102_m008590	50	24	26
DC_09B15	PMAA_091910_103_m006999	2	9	88
DC_09C12	PMAA_040070_97_m006458	49	20	32
DC_09C4	PMAA_048230_97_m007268	73	10	16
DC_09C6	PMAA_042070_97_m006654	22	49	29
DC_09E10	PMAA_028700_96_m014796	53	24	23
DC_09F21	PMAA_084770_102_m008562	34	22	45
DC_09F23	PMAA_035220_96_m015452	52	21	28
DC_09F6	PMAA_060250_99_m007532	62	25	13
DC_09G16	PMAA_099830_103_m007806	59	20	21
DC_09H19	PMAA_065170_100_m008823	55	25	20
DC_09I15	PMAA_043430_97_m006786	21	21	58
DC_09I2	PMAA_083730_102_m008459	48	27	25
DC_09I23	PMAA_085020_102_m008587	46	24	30
DC_09L16	PMAA_018570_96_m013785	56	26	19
DC_09N20	PMAA_068430_100_m009148	40	39	21
DC_09O16	PMAA_028960_96_m014822	48	28	25

## Sheet: PmTranslation.xls
GeneID	RNA nucleotide accession.version	protein accession.version	Symbol (from UniGeneList)	Protein ID (from pm_model_mod)	Description (from pm_model_mod)
7024815	XM_002145573.1	XP_002145609.1	PMAA_061930	100.m008478	DNA helicase recq, putative
7023340	XM_002145574.1	XP_002145610.1	PMAA_061940	100.m008479	retrovirus polyprotein, putative
7023336	XM_002145575.1	XP_002145611.1	PMAA_061950	100.m008480	hypothetical protein
7023337	XM_002145576.1	XP_002145612.1	PMAA_061960	100.m008481	hypothetical protein
7023338	XM_002145577.1	XP_002145613.1	PMAA_061970	100.m008482	conserved hypothetical protein
7023339	XM_002145578.1	XP_002145614.1	PMAA_061980	100.m008483	conserved hypothetical protein
7023341	XM_002145579.1	XP_002145615.1	PMAA_061990	100.m008484	cytochrome P450, putative
7023342	XM_002145580.1	XP_002145616.1	PMAA_062000	100.m008485	conserved hypothetical protein
7023343	XM_002145581.1	XP_002145617.1	PMAA_062010	100.m008486	conserved hypothetical protein
7023344	XM_002145582.1	XP_002145618.1	PMAA_062020	100.m008489	aspartyl protease, putative
7023345	XM_002145583.1	XP_002145619.1	PMAA_062030	100.m008490	hypothetical protein
7023346	XM_002145584.1	XP_002145620.1	PMAA_062040	100.m008491	hypothetical protein
7023347	XM_002145585.1	XP_002145621.1	PMAA_062050	100.m008493	conserved hypothetical protein
7023348	XM_002145586.1	XP_002145622.1	PMAA_062060	100.m008496	conserved hypothetical protein
7023349	XM_002145587.1	XP_002145623.1	PMAA_062070	100.m008497	hypothetical protein
7023350	XM_002145588.1	XP_002145624.1	PMAA_062080	100.m008501	conserved hypothetical protein
7023350	XM_002145589.1	XP_002145625.1	PMAA_062080	100.m008501	conserved hypothetical protein
7023350	XM_002145590.1	XP_002145626.1	PMAA_062080	100.m008501	conserved hypothetical protein
7023351	XM_002145591.1	XP_002145627.1	PMAA_062090	100.m008502	hypothetical protein
7023351	XM_002145592.1	XP_002145628.1	PMAA_062090	100.m008502	hypothetical protein
7023351	XM_002145593.1	XP_002145629.1	PMAA_062090	100.m008502	hypothetical protein
7023352	XM_002145594.1	XP_002145630.1	PMAA_062100	100.m008503	hypothetical protein
7023353	XM_002145595.1	XP_002145631.1	PMAA_062110	100.m008504	aspergillopepsin A precursor, putative
7023354	XM_002145596.1	XP_002145632.1	PMAA_062120	100.m008505	hypothetical protein
7023355	XM_002145597.1	XP_002145633.1	PMAA_062130	100.m008506	conserved hypothetical protein
7023356	XM_002145598.1	XP_002145634.1	PMAA_062140	100.m008510	hypothetical protein
7023357	XM_002145599.1	XP_002145635.1	PMAA_062150	100.m008511	C6 finger domain protein, putative
7023358	XM_002145600.1	XP_002145636.1	PMAA_062160	100.m008512	membrane copper amine oxidase, putative
7023359	XM_002145601.1	XP_002145637.1	PMAA_062170	100.m008513	aspergillopepsin F precursor, putative
7023360	XM_002145602.1	XP_002145638.1	PMAA_062180	100.m008516	hypothetical protein
7023361	XM_002145603.1	XP_002145639.1	PMAA_062190	100.m008517	hypothetical protein
7023362	XM_002145604.1	XP_002145640.1	PMAA_062200	100.m008518	retrovirus polyprotein, putative
7023363	XM_002145605.1	XP_002145641.1	PMAA_062210	100.m008519	retrovirus polyprotein, putative
7023364	XM_002145606.1	XP_002145642.1	PMAA_062220	100.m008520	hypothetical protein
7023365	XM_002145607.1	XP_002145643.1	PMAA_062230	100.m008521	retrovirus polyprotein, putative
7023366	XM_002145608.1	XP_002145644.1	PMAA_062240	100.m008522	retrovirus polyprotein, putative
7023367	XM_002145609.1	XP_002145645.1	PMAA_062250	100.m008523	hypothetical protein
7023368	XM_002145610.1	XP_002145646.1	PMAA_062260	100.m008524	hypothetical protein
7023369	XM_002145611.1	XP_002145647.1	PMAA_062270	100.m008529	aspergillopepsin A precursor, putative
7023370	XM_002145612.1	XP_002145648.1	PMAA_062280	100.m008530	hypothetical protein
7023371	XM_002145613.1	XP_002145649.1	PMAA_062290	100.m008531	acetyltransferase, GNAT family family
7023372	XM_002145614.1	XP_002145650.1	PMAA_062300	100.m008532	phosphate:H+ symporter
7023373	XM_002145615.1	XP_002145651.1	PMAA_062310	100.m008533	conserved hypothetical protein
7023374	XM_002145616.1	XP_002145652.1	PMAA_062320	100.m008534	conserved hypothetical protein
7023375	XM_002145617.1	XP_002145653.1	PMAA_062330	100.m008535	hypothetical protein
7023376	XM_002145618.1	XP_002145654.1	PMAA_062340	100.m008537	conserved hypothetical protein
7023377	XM_002145619.1	XP_002145655.1	PMAA_062350	100.m008538	2-hydroxyacid dehydrogenase, putative
7023378	XM_002145620.1	XP_002145656.1	PMAA_062360	100.m008539	methionine permease, putative
7023379	XM_002145621.1	XP_002145657.1	PMAA_062370	100.m008541	aspergillopepsin A precursor, putative
7023380	XM_002145622.1	XP_002145658.1	PMAA_062380	100.m008542	pyruvate decarboxylase, putative
7023380	XM_002145623.1	XP_002145659.1	PMAA_062380	100.m008542	pyruvate decarboxylase, putative
7023381	XM_002145624.1	XP_002145660.1	PMAA_062390	100.m008543	amidase family protein, putative
7023382	XM_002145625.1	XP_002145661.1	PMAA_062400	100.m008544	conserved hypothetical protein
7023383	XM_002145626.1	XP_002145662.1	PMAA_062410	100.m008545	hypothetical protein
7023384	XM_002145627.1	XP_002145663.1	PMAA_062420	100.m008546	monoxygenase, putative
7023385	XM_002145628.1	XP_002145664.1	PMAA_062430	100.m008547	N-carbamoyl-L-amino acid hydrolase, putative
7023386	XM_002145629.1	XP_002145665.1	PMAA_062440	100.m008548	conserved hypothetical protein
7023387	XM_002145630.1	XP_002145666.1	PMAA_062450	100.m008549	2-hydroxyacid dehydrogenase, putative
7023388	XM_002145631.1	XP_002145667.1	PMAA_062460	100.m008550	class II aldolase/adducin domain protein
7023389	XM_002145632.1	XP_002145668.1	PMAA_062470	100.m008551	isoflavone reductase family protein
7023390	XM_002145633.1	XP_002145669.1	PMAA_062480	100.m008552	salicylate hydroxylase, putative
7023391	XM_002145634.1	XP_002145670.1	PMAA_062490	100.m008553	Rieske [2Fe-2S] domain protein
7023392	XM_002145635.1	XP_002145671.1	PMAA_062500	100.m008554	hypothetical protein
7023393	XM_002145636.1	XP_002145672.1	PMAA_062510	100.m008555	aspergillopepsin A precursor, putative
7023394	XM_002145637.1	XP_002145673.1	PMAA_062520	100.m008556	glycosyl hydrolase, putative
7023395	XM_002145638.1	XP_002145674.1	PMAA_062530	100.m008557	ammonium transporter, putative
7023396	XM_002145639.1	XP_002145675.1	PMAA_062540	100.m008558	hypothetical protein
7023396	XM_002145640.1	XP_002145676.1	PMAA_062540	100.m008558	hypothetical protein
7023397	XM_002145641.1	XP_002145677.1	PMAA_062550	100.m008559	conserved hypothetical protein
7023398	XM_002145642.1	XP_002145678.1	PMAA_062560	100.m008560	extracellular exo-polygalacturonase, putative
7023399	XM_002145643.1	XP_002145679.1	PMAA_062570	100.m008561	dienelactone hydrolase family protein
7023399	XM_002145644.1	XP_002145680.1	PMAA_062570	100.m008561	dienelactone hydrolase family protein
7023399	XM_002145645.1	XP_002145681.1	PMAA_062570	100.m008561	dienelactone hydrolase family protein
7023400	XM_002145646.1	XP_002145682.1	PMAA_062580	100.m008562	beta-xylosidase XylA
7023401	XM_002145647.1	XP_002145683.1	PMAA_062590	100.m008563	conserved hypothetical protein
7023402	XM_002145648.1	XP_002145684.1	PMAA_062600	100.m008564	NRPS-like enzyme, putative
7023403	XM_002145649.1	XP_002145685.1	PMAA_062610	100.m008565	amino acid transporter, putative
7023404	XM_002145650.1	XP_002145686.1	PMAA_062620	100.m008566	short-chain dehydrogenase, putative
7023405	XM_002145651.1	XP_002145687.1	PMAA_062630	100.m008567	conserved hypothetical protein
7023406	XM_002145652.1	XP_002145688.1	PMAA_062640	100.m008568	12-oxophytodienoate reductase, putative
7023406	XM_002145653.1	XP_002145689.1	PMAA_062640	100.m008568	12-oxophytodienoate reductase, putative
7023407	XM_002145654.1	XP_002145690.1	PMAA_062650	100.m008569	arrestin domain containing protein, putative
7023407	XM_002145655.1	XP_002145691.1	PMAA_062650	100.m008569	arrestin domain containing protein, putative
7023408	XM_002145656.1	XP_002145692.1	PMAA_062660	100.m008570	hypothetical protein
7023409	XM_002145657.1	XP_002145693.1	PMAA_062670	100.m008571	glucosylceramidase, putative
7023410	XM_002145658.1	XP_002145694.1	PMAA_062680	100.m008572	RTA1 domain protein
7023411	XM_002145659.1	XP_002145695.1	PMAA_062690	100.m008573	longevity assurance factor, putative
7023412	XM_002145660.1	XP_002145696.1	PMAA_062700	100.m008574	flavin-binding monooxygenase-like protein
7023413	XM_002145661.1	XP_002145697.1	PMAA_062710	100.m008575	conserved hypothetical protein
7023414	XM_002145662.1	XP_002145698.1	PMAA_062720	100.m008576	5'-nucleotidase, putative
7023415	XM_002145663.1	XP_002145699.1	PMAA_062730	100.m008577	hypothetical protein
7023416	XM_002145664.1	XP_002145700.1	PMAA_062740	100.m008578	conserved hypothetical protein
7023417	XM_002145665.1	XP_002145701.1	PMAA_062750	100.m008579	hypothetical protein
7023418	XM_002145666.1	XP_002145702.1	PMAA_062760	100.m008580	flavin carrier protein 2 precursor, putative
7023419	XM_002145667.1	XP_002145703.1	PMAA_062770	100.m008581	CFEM domain protein
7023420	XM_002145668.1	XP_002145704.1	PMAA_062780	100.m008582	conserved hypothetical protein
7023421	XM_002145669.1	XP_002145705.1	PMAA_062790	100.m008583	malate/L-lactate dehydrogenase, putative
7023422	XM_002145670.1	XP_002145706.1	PMAA_062800	100.m008584	3-oxoacyl-[acyl-carrier-protein] reductase, putative
7023423	XM_002145671.1	XP_002145707.1	PMAA_062810	100.m008585	hypothetical protein
7023424	XM_002145672.1	XP_002145708.1	PMAA_062820	100.m008586	conserved hypothetical protein
7023425	XM_002145673.1	XP_002145709.1	PMAA_062830	100.m008587	hypothetical protein
7023426	XM_002145674.1	XP_002145710.1	PMAA_062840	100.m008588	conserved hypothetical protein
7023427	XM_002145675.1	XP_002145711.1	PMAA_062850	100.m008589	cytochrome c peroxidase, putative
7023428	XM_002145676.1	XP_002145712.1	PMAA_062860	100.m008590	hypothetical protein
7023429	XM_002145677.1	XP_002145713.1	PMAA_062870	100.m008591	conserved hypothetical protein
7023430	XM_002145678.1	XP_002145714.1	PMAA_062880	100.m008592	multi-copper oxidase, putative
7023431	XM_002145679.1	XP_002145715.1	PMAA_062890	100.m008593	NRPS-like enzyme, putative
7023432	XM_002145680.1	XP_002145716.1	PMAA_062900	100.m008594	NAD dependent epimerase/dehydratase, putative
7023433	XM_002145681.1	XP_002145717.1	PMAA_062910	100.m008595	2OG-Fe(II) oxygenase family oxidoreductase, putative
7023434	XM_002145682.1	XP_002145718.1	PMAA_062920	100.m008596	MFS transporter, putative
7023435	XM_002145683.1	XP_002145719.1	PMAA_062930	100.m008597	O-methyltransferase, putative
7023436	XM_002145684.1	XP_002145720.1	PMAA_062940	100.m008599	polyketide synthase, putative
7023437	XM_002145685.1	XP_002145721.1	PMAA_062950	100.m008600	FAD-dependent oxidase, putative
7023438	XM_002145686.1	XP_002145722.1	PMAA_062960	100.m008601	benzoate 4-monooxygenase cytochrome P450, putative
7023439	XM_002145687.1	XP_002145723.1	PMAA_062970	100.m008602	DNA-binding protein eta2, putative
7023440	XM_002145688.1	XP_002145724.1	PMAA_062980	100.m008603	conserved hypothetical protein
7023441	XM_002145689.1	XP_002145725.1	PMAA_062990	100.m008604	siderochrome-iron transporter, putative
7023442	XM_002145690.1	XP_002145726.1	PMAA_063000	100.m008605	zinc alcohol dehydrogenase, putative
7023443	XM_002145691.1	XP_002145727.1	PMAA_063010	100.m008606	lipase/esterase family protein
7023444	XM_002145692.1	XP_002145728.1	PMAA_063020	100.m008607	nucleotide binding protein, putative
7023444	XM_002145693.1	XP_002145729.1	PMAA_063020	100.m008607	nucleotide binding protein, putative
7023445	XM_002145694.1	XP_002145730.1	PMAA_063030	100.m008608	vesicle-mediated transport protein Bfr2/Che-1, putative
7023446	XM_002145695.1	XP_002145731.1	PMAA_063040	100.m008609	conserved hypothetical protein
7023447	XM_002145696.1	XP_002145732.1	PMAA_063050	100.m008610	bZIP transcription factor AP-1/Yap1, putative
7023447	XM_002145697.1	XP_002145733.1	PMAA_063050	100.m008610	bZIP transcription factor AP-1/Yap1, putative
7023448	XM_002145698.1	XP_002145734.1	PMAA_063060	100.m008611	hypothetical protein
7023449	XM_002145699.1	XP_002145735.1	PMAA_063070	100.m008612	conserved hypothetical protein
7023450	XM_002145700.1	XP_002145736.1	PMAA_063080	100.m008613	hypothetical protein
7023451	XM_002145701.1	XP_002145737.1	PMAA_063090	100.m008614	DUF74 domain protein
7023452	XM_002145702.1	XP_002145738.1	PMAA_063100	100.m008615	hypothetical protein
7023453	XM_002145703.1	XP_002145739.1	PMAA_063110	100.m008616	conserved hypothetical protein
7023454	XM_002145704.1	XP_002145740.1	PMAA_063120	100.m008617	D-aminoacylase, putative
7023455	XM_002145705.1	XP_002145741.1	PMAA_063130	100.m008618	carboxylesterase, putative
7023456	XM_002145706.1	XP_002145742.1	PMAA_063140	100.m008619	conserved hypothetical protein
7023457	XM_002145707.1	XP_002145743.1	PMAA_063150	100.m008620	conserved hypothetical protein
7023458	XM_002145708.1	XP_002145744.1	PMAA_063160	100.m008621	hypothetical protein
7023459	XM_002145709.1	XP_002145745.1	PMAA_063170	100.m008622	fatty-acid amide hydrolase, putative
7023460	XM_002145710.1	XP_002145746.1	PMAA_063180	100.m008623	hypothetical protein
7023461	XM_002145711.1	XP_002145747.1	PMAA_063190	100.m008624	conserved hypothetical protein
7023462	XM_002145712.1	XP_002145748.1	PMAA_063200	100.m008625	aldehyde dehydrogenase, putative
7023463	XM_002145713.1	XP_002145749.1	PMAA_063210	100.m008626	conserved hypothetical protein
7023464	XM_002145714.1	XP_002145750.1	PMAA_063220	100.m008627	glutamate-1-semialdehyde 2,1-aminomutase, putative
7023465	XM_002145715.1	XP_002145751.1	PMAA_063230	100.m008628	hydroxysteroid dehydrogenase, putative
7023466	XM_002145716.1	XP_002145752.1	PMAA_063240	100.m008629	patched sphingolipid transporter (Ncr1), putative
7023467	XM_002145717.1	XP_002145753.1	PMAA_063250	100.m008630	alpha-amylase, putative
7023468	XM_002145718.1	XP_002145754.1	PMAA_063260	100.m008631	importin beta-4 subunit, putative
7023469	XM_002145719.1	XP_002145755.1	PMAA_063270	100.m008632	Pfs, NB-ARC and TPR domain protein
7023470	XM_002145720.1	XP_002145756.1	PMAA_063280	100.m008633	ABC multidrug transporter, putative
7023471	XM_002145721.1	XP_002145757.1	PMAA_063290	100.m008634	FAD dependent oxidoreductase, putative
7023472	XM_002145722.1	XP_002145758.1	PMAA_063300	100.m008635	acid phosphatase AphA
7023473	XM_002145723.1	XP_002145759.1	PMAA_063310	100.m008636	ankyrin repeat-cotaining protein, putative
7023474	XM_002145724.1	XP_002145760.1	PMAA_063320	100.m008637	N,O-diacetyl muramidase, putative
7023475	XM_002145725.1	XP_002145761.1	PMAA_063330	100.m008638	small oligopeptide transporter, OPT family
7023476	XM_002145726.1	XP_002145762.1	PMAA_063340	100.m008639	C6 transcription factor, putative
7023477	XM_002145727.1	XP_002145763.1	PMAA_063350	100.m008640	D-isomer specific 2-hydroxyacid dehydrogenase family protein
7023478	XM_002145728.1	XP_002145764.1	PMAA_063360	100.m008641	conserved hypothetical protein
7023479	XM_002145729.1	XP_002145765.1	PMAA_063370	100.m008642	15-hydroxyprostaglandin dehydrogenase, putative
7023480	XM_002145730.1	XP_002145766.1	PMAA_063380	100.m008643	guanine deaminase, putative
7023481	XM_002145731.1	XP_002145767.1	PMAA_063390	100.m008644	conserved hypothetical protein
7023482	XM_002145732.1	XP_002145768.1	PMAA_063400	100.m008645	PEX11 domain protein
7023483	XM_002145733.1	XP_002145769.1	PMAA_063410	100.m008646	F-actin capping protein alpha subunit, putative
7023484	XM_002145734.1	XP_002145770.1	PMAA_063420	100.m008647	hypothetical protein
7023485	XM_002145735.1	XP_002145771.1	PMAA_063430	100.m008648	conserved hypothetical protein
7023486	XM_002145736.1	XP_002145772.1	PMAA_063440	100.m008649	hypothetical protein
7023487	XM_002145737.1	XP_002145773.1	PMAA_063450	100.m008650	SWI/SNF family DNA-dependent ATPase Ris1, putative
7023488	XM_002145738.1	XP_002145774.1	PMAA_063460	100.m008651	GTP-binding nuclear protein Ran, putative
7023489	XM_002145739.1	XP_002145775.1	PMAA_063470	100.m008652	26S proteasome non-ATPase regulatory subunit Nas2, putative
7023489	XM_002145740.1	XP_002145776.1	PMAA_063470	100.m008652	26S proteasome non-ATPase regulatory subunit Nas2, putative
7023490	XM_002145741.1	XP_002145777.1	PMAA_063480	100.m008653	Rho guanyl nucleotide exchange factor, putative
7023491	XM_002145742.1	XP_002145778.1	PMAA_063490	100.m008654	RNA binding protein, putative
7023491	XM_002145743.1	XP_002145779.1	PMAA_063490	100.m008654	RNA binding protein, putative
7023492	XM_002145744.1	XP_002145780.1	PMAA_063500	100.m008655	mismatch-specific thymine-DNA glycosylase, putative
7023493	XM_002145745.1	XP_002145781.1	PMAA_063510	100.m008656	pogo transposable element, putative
7023494	XM_002145746.1	XP_002145782.1	PMAA_063520	100.m008657	hypothetical protein
7023495	XM_002145747.1	XP_002145783.1	PMAA_063530	100.m008658	conserved hypothetical protein
7023496	XM_002145748.1	XP_002145784.1	PMAA_063540	100.m008659	aldo-keto reductase, putative
7023497	XM_002145749.1	XP_002145785.1	PMAA_063550	100.m008660	conserved hypothetical protein
7023498	XM_002145750.1	XP_002145786.1	PMAA_063560	100.m008661	C6 transcription factor, putative
7023499	XM_002145751.1	XP_002145787.1	PMAA_063570	100.m008662	benzoate 4-monooxygenase cytochrome P450, putative
7023500	XM_002145752.1	XP_002145788.1	PMAA_063580	100.m008663	monooxygenase, putative
7023501	XM_002145753.1	XP_002145789.1	PMAA_063590	100.m008664	conserved hypothetical protein
7023502	XM_002145754.1	XP_002145790.1	PMAA_063600	100.m008665	conserved hypothetical protein
7023503	XM_002145755.1	XP_002145791.1	PMAA_063610	100.m008666	conserved hypothetical protein
7023504	XM_002145756.1	XP_002145792.1	PMAA_063620	100.m008667	polyketide synthase, putative
7023505	XM_002145757.1	XP_002145793.1	PMAA_063630	100.m008668	Maleylacetate reductase, putative
7023506	XM_002145758.1	XP_002145794.1	PMAA_063640	100.m008669	O-methyltransferase, putative
7023507	XM_002145759.1	XP_002145795.1	PMAA_063650	100.m008670	cytochrome P450, putative
7023508	XM_002145760.1	XP_002145796.1	PMAA_063660	100.m008671	conserved hypothetical protein
7023509	XM_002145761.1	XP_002145797.1	PMAA_063670	100.m008672	conserved hypothetical protein
7023510	XM_002145762.1	XP_002145798.1	PMAA_063680	100.m008673	hypothetical protein
7023511	XM_002145763.1	XP_002145799.1	PMAA_063690	100.m008674	conserved hypothetical protein
7023512	XM_002145764.1	XP_002145800.1	PMAA_063700	100.m008675	NADPH oxidase (NoxA), putative
7023513	XM_002145765.1	XP_002145801.1	PMAA_063710	100.m008676	conserved hypothetical protein
7023514	XM_002145766.1	XP_002145802.1	PMAA_063720	100.m008677	SSU processome component Utp10, putative
7023515	XM_002145767.1	XP_002145803.1	PMAA_063730	100.m008678	NACHT domain protein
7023516	XM_002145768.1	XP_002145804.1	PMAA_063740	100.m008679	hypothetical protein
7023517	XM_002145769.1	XP_002145805.1	PMAA_063750	100.m008680	choline sulfatase, putative
7023518	XM_002145770.1	XP_002145806.1	PMAA_063760	100.m008681	multispanning membrane protein, putative
7023519	XM_002145771.1	XP_002145807.1	PMAA_063770	100.m008682	ubiquitin-like protein DskB, putative
7023520	XM_002145772.1	XP_002145808.1	PMAA_063780	100.m008683	nuclear mRNA splicing factor, putative
7023521	XM_002145773.1	XP_002145809.1	PMAA_063790	100.m008684	nitrilase
7023522	XM_002145774.1	XP_002145810.1	PMAA_063800	100.m008685	GrpB domain protein
7023522	XM_002145775.1	XP_002145811.1	PMAA_063800	100.m008685	GrpB domain protein
7023523	XM_002145776.1	XP_002145812.1	PMAA_063810	100.m008686	L-asparaginase, putative
7023524	XM_002145777.1	XP_002145813.1	PMAA_063820	100.m008687	neurofilament heavy polypeptide, putative
7023525	XM_002145778.1	XP_002145814.1	PMAA_063830	100.m008688	conserved hypothetical protein
7023526	XM_002145779.1	XP_002145815.1	PMAA_063840	100.m008689	conserved hypothetical protein
7023527	XM_002145780.1	XP_002145816.1	PMAA_063850	100.m008690	conserved hypothetical protein
7023528	XM_002145781.1	XP_002145817.1	PMAA_063860	100.m008691	glutamate decarboxylase
7023529	XM_002145782.1	XP_002145818.1	PMAA_063870	100.m008692	TPR repeat protein
7023530	XM_002145783.1	XP_002145819.1	PMAA_063880	100.m008693	hypothetical protein
7023531	XM_002145784.1	XP_002145820.1	PMAA_063890	100.m008694	conserved hypothetical protein
7023532	XM_002145785.1	XP_002145821.1	PMAA_063900	100.m008695	nuclear serine protease HtrA2/Nma111, putative
7023533	XM_002145786.1	XP_002145822.1	PMAA_063910	100.m008696	conserved hypothetical protein
7023534	XM_002145787.1	XP_002145823.1	PMAA_063920	100.m008697	hypothetical protein
7023535	XM_002145788.1	XP_002145824.1	PMAA_063930	100.m008698	conserved hypothetical protein
7023536	XM_002145789.1	XP_002145825.1	PMAA_063940	100.m008699	conserved hypothetical protein
7023537	XM_002145790.1	XP_002145826.1	PMAA_063950	100.m008700	thymidylate synthase
7023538	XM_002145791.1	XP_002145827.1	PMAA_063960	100.m008701	aspergillopepsin-2 precursor, putative
7023539	XM_002145792.1	XP_002145828.1	PMAA_063970	100.m008702	glutathione-S-transferase theta, GST, putative
7023540	XM_002145793.1	XP_002145829.1	PMAA_063980	100.m008703	conserved hypothetical protein
7023541	XM_002145794.1	XP_002145830.1	PMAA_063990	100.m008704	conserved hypothetical protein
7023542	XM_002145795.1	XP_002145831.1	PMAA_064000	100.m008705	conserved hypothetical protein
7023543	XM_002145796.1	XP_002145832.1	PMAA_064010	100.m008706	conserved hypothetical protein
7023544	XM_002145797.1	XP_002145833.1	PMAA_064020	100.m008707	APSES transcription factor Xbp1, putative
7023545	XM_002145798.1	XP_002145834.1	PMAA_064030	100.m008708	DNA topoisomerase II
7023546	XM_002145799.1	XP_002145835.1	PMAA_064040	100.m008709	GTPase activating protein (Evi5), putative
7023547	XM_002145800.1	XP_002145836.1	PMAA_064050	100.m008710	conserved hypothetical protein
7023548	XM_002145801.1	XP_002145837.1	PMAA_064060	100.m008711	conserved hypothetical protein
7023549	XM_002145802.1	XP_002145838.1	PMAA_064070	100.m008712	apoptosis-inducing factor, putative
7023550	XM_002145803.1	XP_002145839.1	PMAA_064080	100.m008713	UPF0023 family protein
7023551	XM_002145804.1	XP_002145840.1	PMAA_064090	100.m008714	carboxypeptidase CpyA/Prc1, putative
7023552	XM_002145805.1	XP_002145841.1	PMAA_064100	100.m008715	ribosomal protein S13p/S18e
7023552	XM_002145806.1	XP_002145842.1	PMAA_064100	100.m008715	ribosomal protein S13p/S18e
7023553	XM_002145807.1	XP_002145843.1	PMAA_064110	100.m008716	conserved hypothetical protein
7023554	XM_002145808.1	XP_002145844.1	PMAA_064120	100.m008717	MFS transporter, putative
7023555	XM_002145809.1	XP_002145845.1	PMAA_064130	100.m008718	MFS multidrug transporter, putative
7023556	XM_002145810.1	XP_002145846.1	PMAA_064140	100.m008719	conserved hypothetical protein
7023557	XM_002145811.1	XP_002145847.1	PMAA_064150	100.m008720	thiosulfate sulfurtransferase, putative
7023558	XM_002145812.1	XP_002145848.1	PMAA_064160	100.m008721	conserved hypothetical protein
7023559	XM_002145813.1	XP_002145849.1	PMAA_064170	100.m008722	conserved hypothetical protein
7023560	XM_002145814.1	XP_002145850.1	PMAA_064180	100.m008723	reverse transcriptase, putative
7023561	XM_002145815.1	XP_002145851.1	PMAA_064190	100.m008724	conserved hypothetical protein
7023562	XM_002145816.1	XP_002145852.1	PMAA_064200	100.m008725	monocarboxylate permease, putative
7023563	XM_002145817.1	XP_002145853.1	PMAA_064210	100.m008726	C6 finger domain protein, putative
7023564	XM_002145818.1	XP_002145854.1	PMAA_064220	100.m008727	PHD finger protein
7023565	XM_002145819.1	XP_002145855.1	PMAA_064230	100.m008728	FAD/FMN-containing isoamyl alcohol oxidase MreA
7023566	XM_002145820.1	XP_002145856.1	PMAA_064240	100.m008729	integral membrane protein (Pth11), putative
7023567	XM_002145821.1	XP_002145857.1	PMAA_064250	100.m008730	alpha-1,2-mannosidase, putative subfamily
7023568	XM_002145822.1	XP_002145858.1	PMAA_064260	100.m008731	hypothetical protein
7023569	XM_002145823.1	XP_002145859.1	PMAA_064270	100.m008732	hypothetical protein
7023570	XM_002145824.1	XP_002145860.1	PMAA_064280	100.m008733	conserved hypothetical protein
7023571	XM_002145826.1	XP_002145862.1	PMAA_064290	100.m008734	pyruvate dehydrogenase, putative
7023573	XM_002145825.1	XP_002145861.1	PMAA_064300	100.m008735	DNA repair protein Rad4, putative
7023572	XM_002145827.1	XP_002145863.1	PMAA_064310	100.m008736	conserved hypothetical protein
7023574	XM_002145828.1	XP_002145864.1	PMAA_064320	100.m008737	aminotransferase, putative
7023575	XM_002145829.1	XP_002145865.1	PMAA_064330	100.m008738	conserved hypothetical protein
7023576	XM_002145830.1	XP_002145866.1	PMAA_064340	100.m008739	BSD domain protein
7023577	XM_002145831.1	XP_002145867.1	PMAA_064350	100.m008740	RanGTP-binding protein
7023578	XM_002145832.1	XP_002145868.1	PMAA_064360	100.m008741	translation release factor eRF3, putative
7023579	XM_002145833.1	XP_002145869.1	PMAA_064370	100.m008742	DUF636 domain protein
7023580	XM_002145834.1	XP_002145870.1	PMAA_064380	100.m008743	hypothetical protein
7023581	XM_002145835.1	XP_002145871.1	PMAA_064390	100.m008744	pre-rRNA processing protein, putative
7023582	XM_002145836.1	XP_002145872.1	PMAA_064400	100.m008745	conserved hypothetical protein
7023583	XM_002145837.1	XP_002145873.1	PMAA_064410	100.m008746	cell wall biogenesis protein, putative
7023584	XM_002145838.1	XP_002145874.1	PMAA_064420	100.m008747	hypothetical protein
7023585	XM_002145839.1	XP_002145875.1	PMAA_064430	100.m008748	FAD-dependent oxygenase, putative
7023586	XM_002145840.1	XP_002145876.1	PMAA_064440	100.m008749	GABA permease, putative
7023587	XM_002145841.1	XP_002145877.1	PMAA_064450	100.m008750	conserved hypothetical protein
7023588	XM_002145842.1	XP_002145878.1	PMAA_064460	100.m008751	GNAT family acetyltransferase, putative
7023589	XM_002145843.1	XP_002145879.1	PMAA_064470	100.m008752	isochorismatase family protein
7023590	XM_002145844.1	XP_002145880.1	PMAA_064480	100.m008753	3-dehydroshikimate dehydratase, putative
7023591	XM_002145845.1	XP_002145881.1	PMAA_064490	100.m008754	6-phosphogluconate dehydrogenase, decarboxylating
7023592	XM_002145846.1	XP_002145882.1	PMAA_064500	100.m008755	acid sphingomyelinase, putative
7023593	XM_002145847.1	XP_002145883.1	PMAA_064510	100.m008756	conserved hypothetical protein
7023594	XM_002145848.1	XP_002145884.1	PMAA_064520	100.m008757	hypothetical protein
7023596	XM_002145850.1	XP_002145886.1	PMAA_064540	100.m008759	5'-methylthioadenosine phosphorylase (Meu1), putative
7023597	XM_002145851.1	XP_002145887.1	PMAA_064550	100.m008760	DUF455 domain protein
7023598	XM_002145852.1	XP_002145888.1	PMAA_064560	100.m008761	phosphotyrosyl phosphatase activator
7023599	XM_002145853.1	XP_002145889.1	PMAA_064570	100.m008762	hypothetical protein
7023600	XM_002145854.1	XP_002145890.1	PMAA_064580	100.m008763	M protein repeat protein
7023601	XM_002145855.1	XP_002145891.1	PMAA_064590	100.m008764	cellular morphogenesis protein (Bud22), putative
7023602	XM_002145856.1	XP_002145892.1	PMAA_064600	100.m008765	NADH-ubiquinone oxidoreductase 304 kDa subunit precursor
7023602	XM_002145857.1	XP_002145893.1	PMAA_064600	100.m008765	NADH-ubiquinone oxidoreductase 304 kDa subunit precursor
7023603	XM_002145858.1	XP_002145894.1	PMAA_064610	100.m008766	CCR4-NOT core complex subunit Not4, putative
7023604	XM_002145859.1	XP_002145895.1	PMAA_064620	100.m008767	2-oxoisovalerate dehydrogenase complex alpha subunit, putative
7023605	XM_002145860.1	XP_002145896.1	PMAA_064630	100.m008768	glutathione-S-transferase theta, GST, putative
7023605	XM_002145861.1	XP_002145897.1	PMAA_064630	100.m008768	glutathione-S-transferase theta, GST, putative
7023605	XM_002145862.1	XP_002145898.1	PMAA_064630	100.m008768	glutathione-S-transferase theta, GST, putative
7023606	XM_002145863.1	XP_002145899.1	PMAA_064640	100.m008769	conserved hypothetical protein
7023607	XM_002145864.1	XP_002145900.1	PMAA_064650	100.m008770	protein adg3 precursor, putative
7023608	XM_002145865.1	XP_002145901.1	PMAA_064660	100.m008771	beta-mannosidase
7023609	XM_002145866.1	XP_002145902.1	PMAA_064670	100.m008772	carboxyphosphonoenolpyruvate phosphonomutase, putative
7023610	XM_002145867.1	XP_002145903.1	PMAA_064680	100.m008773	DUF1275 domain protein
7023611	XM_002145868.1	XP_002145904.1	PMAA_064690	100.m008774	conserved hypothetical protein
7023612	XM_002145869.1	XP_002145905.1	PMAA_064700	100.m008775	delta-1-pyrroline-5-carboxylate dehydrogenase PrnC
7023612	XM_002145870.1	XP_002145906.1	PMAA_064700	100.m008775	delta-1-pyrroline-5-carboxylate dehydrogenase PrnC
7023613	XM_002145871.1	XP_002145907.1	PMAA_064710	100.m008776	alpha/beta hydrolase, putative
7023614	XM_002145872.1	XP_002145908.1	PMAA_064720	100.m008777	hypothetical protein
7023615	XM_002145873.1	XP_002145909.1	PMAA_064730	100.m008778	hypothetical protein
7023616	XM_002145874.1	XP_002145910.1	PMAA_064740	100.m008779	nitrilotriacetate monooxygenase component A, putative
7023617	XM_002145875.1	XP_002145911.1	PMAA_064750	100.m008780	beta glucosidase, putative
7023618	XM_002145876.1	XP_002145912.1	PMAA_064760	100.m008781	conserved hypothetical protein
7023619	XM_002145877.1	XP_002145913.1	PMAA_064770	100.m008782	hypothetical protein
7023620	XM_002145878.1	XP_002145914.1	PMAA_064780	100.m008783	conserved hypothetical protein
7023621	XM_002145879.1	XP_002145915.1	PMAA_064790	100.m008784	hypothetical protein
7023622	XM_002145880.1	XP_002145916.1	PMAA_064800	100.m008785	hypothetical protein
7023623	XM_002145881.1	XP_002145917.1	PMAA_064810	100.m008786	hypothetical protein
7023624	XM_002145882.1	XP_002145918.1	PMAA_064820	100.m008787	Hsp70 family protein
7023625	XM_002145883.1	XP_002145919.1	PMAA_064830	100.m008788	hypothetical protein
7023626	XM_002145884.1	XP_002145920.1	PMAA_064840	100.m008789	hypothetical protein
7023627	XM_002145885.1	XP_002145921.1	PMAA_064850	100.m008790	conserved hypothetical protein
7023628	XM_002145886.1	XP_002145922.1	PMAA_064860	100.m008791	conserved hypothetical protein
7023629	XM_002145887.1	XP_002145923.1	PMAA_064870	100.m008792	hypothetical protein
7023630	XM_002145888.1	XP_002145924.1	PMAA_064880	100.m008793	conserved hypothetical protein
7023631	XM_002145889.1	XP_002145925.1	PMAA_064890	100.m008794	polyamine transporter, putative
7023632	XM_002145890.1	XP_002145926.1	PMAA_064900	100.m008795	hypothetical protein
7023633	XM_002145891.1	XP_002145927.1	PMAA_064910	100.m008796	proline-specific permease, putative
7023634	XM_002145892.1	XP_002145928.1	PMAA_064920	100.m008797	srpk, putative
7023635	XM_002145893.1	XP_002145929.1	PMAA_064930	100.m008799	hypothetical protein
7023636	XM_002145894.1	XP_002145930.1	PMAA_064940	100.m008800	ankyrin repeat-cotaining protein, putative
7023637	XM_002145895.1	XP_002145931.1	PMAA_064950	100.m008801	hypothetical protein
7023638	XM_002145896.1	XP_002145932.1	PMAA_064960	100.m008802	conserved hypothetical protein
7023639	XM_002145897.1	XP_002145933.1	PMAA_064970	100.m008803	hypothetical protein
7023640	XM_002145898.1	XP_002145934.1	PMAA_064980	100.m008804	hypothetical protein
7023641	XM_002145899.1	XP_002145935.1	PMAA_064990	100.m008805	alpha-amylase, putative
7023642	XM_002145900.1	XP_002145936.1	PMAA_065000	100.m008806	conserved hypothetical protein
7023643	XM_002145901.1	XP_002145937.1	PMAA_065010	100.m008807	mitochondrial phosphate carrier protein (Mir1), putative
7023644	XM_002145902.1	XP_002145938.1	PMAA_065020	100.m008808	general amidase, putative
7023645	XM_002145903.1	XP_002145939.1	PMAA_065030	100.m008809	hypothetical protein
7023646	XM_002145904.1	XP_002145940.1	PMAA_065040	100.m008810	hypothetical protein
7023647	XM_002145905.1	XP_002145941.1	PMAA_065050	100.m008811	hypothetical protein
7023648	XM_002145906.1	XP_002145942.1	PMAA_065060	100.m008812	N-alkane-inducible cytochrome P450, putative
7023649	XM_002145907.1	XP_002145943.1	PMAA_065070	100.m008813	conserved hypothetical protein
7023650	XM_002145908.1	XP_002145944.1	PMAA_065080	100.m008814	hypothetical protein
7023651	XM_002145909.1	XP_002145945.1	PMAA_065090	100.m008815	hypothetical protein
7023652	XM_002145910.1	XP_002145946.1	PMAA_065100	100.m008816	hypothetical protein
7023653	XM_002145911.1	XP_002145947.1	PMAA_065110	100.m008817	oxidoreductase, short-chain dehydrogenase/reductase family
7023654	XM_002145912.1	XP_002145948.1	PMAA_065120	100.m008818	conserved hypothetical protein
7023655	XM_002145913.1	XP_002145949.1	PMAA_065130	100.m008819	poly(A) polymerase Pap
7023656	XM_002145914.1	XP_002145950.1	PMAA_065140	100.m008820	hypothetical protein
7023657	XM_002145915.1	XP_002145951.1	PMAA_065150	100.m008821	C6 transcription factor, putative
7023658	XM_002145916.1	XP_002145952.1	PMAA_065160	100.m008822	conserved hypothetical protein
7023658	XM_002145917.1	XP_002145953.1	PMAA_065160	100.m008822	conserved hypothetical protein
7023659	XM_002145918.1	XP_002145954.1	PMAA_065170	100.m008823	conserved hypothetical protein
7023660	XM_002145919.1	XP_002145955.1	PMAA_065180	100.m008824	conserved hypothetical protein
7023661	XM_002145920.1	XP_002145956.1	PMAA_065190	100.m008825	hypothetical protein
7023662	XM_002145921.1	XP_002145957.1	PMAA_065200	100.m008826	conserved hypothetical protein
7023663	XM_002145922.1	XP_002145958.1	PMAA_065210	100.m008827	pyridine nucleotide-disulphide oxidoreductase, putative
7023664	XM_002145923.1	XP_002145959.1	PMAA_065220	100.m008828	4-carboxymuconolactone decarboxylase family protein
7023665	XM_002145924.1	XP_002145960.1	PMAA_065230	100.m008829	adenylate cyclase, putative
7023666	XM_002145925.1	XP_002145961.1	PMAA_065240	100.m008830	Hsp20/alpha crystallin family protein
7023667	XM_002145926.1	XP_002145962.1	PMAA_065250	100.m008831	hypothetical protein
7023668	XM_002145927.1	XP_002145963.1	PMAA_065260	100.m008832	hypothetical protein
7023669	XM_002145928.1	XP_002145964.1	PMAA_065270	100.m008833	ankyrin repeat protein
7023670	XM_002145929.1	XP_002145965.1	PMAA_065280	100.m008834	adenosine deaminase, putative
7023671	XM_002145930.1	XP_002145966.1	PMAA_065290	100.m008835	allantoate permease, putative
7023672	XM_002145931.1	XP_002145967.1	PMAA_065300	100.m008836	conserved hypothetical protein
7023673	XM_002145932.1	XP_002145968.1	PMAA_065310	100.m008837	hypothetical protein
7023674	XM_002145933.1	XP_002145969.1	PMAA_065320	100.m008838	hypothetical protein
7023675	XM_002145934.1	XP_002145970.1	PMAA_065330	100.m008839	hypothetical protein
7023676	XM_002145935.1	XP_002145971.1	PMAA_065340	100.m008842	hypothetical protein
7023677	XM_002145936.1	XP_002145972.1	PMAA_065350	100.m008843	trichodiene synthase, putative
7023678	XM_002145937.1	XP_002145973.1	PMAA_065360	100.m008844	cytochrome P450, putative
7023679	XM_002145938.1	XP_002145974.1	PMAA_065370	100.m008845	conserved hypothetical protein
7023680	XM_002145939.1	XP_002145975.1	PMAA_065380	100.m008846	hypothetical protein
7023681	XM_002145940.1	XP_002145976.1	PMAA_065390	100.m008848	aminotransferase, putative
7023682	XM_002145941.1	XP_002145977.1	PMAA_065400	100.m008849	exo-beta-1,3-glucanase Exg0
7023683	XM_002145942.1	XP_002145978.1	PMAA_065410	100.m008850	monooxygenase, putative
7023684	XM_002145943.1	XP_002145979.1	PMAA_065420	100.m008851	phenol monooxygenase, putative
7023685	XM_002145944.1	XP_002145980.1	PMAA_065430	100.m008852	D-lactate dehydrogenase, putative
7023686	XM_002145945.1	XP_002145981.1	PMAA_065440	100.m008853	alcohol dehydrogenase, putative
7023687	XM_002145946.1	XP_002145982.1	PMAA_065450	100.m008854	C6 transcription factor, putative
7023688	XM_002145947.1	XP_002145983.1	PMAA_065460	100.m008855	conserved hypothetical protein
7023689	XM_002145948.1	XP_002145984.1	PMAA_065470	100.m008856	tryptophan permease, putative
7023690	XM_002145949.1	XP_002145985.1	PMAA_065480	100.m008857	aspergillopepsin F precursor, putative
7023691	XM_002145950.1	XP_002145986.1	PMAA_065490	100.m008858	sarcosine oxidase, putative
7023692	XM_002145951.1	XP_002145987.1	PMAA_065500	100.m008859	tyrosyl-tRNA synthetase, putative
7023693	XM_002145952.1	XP_002145988.1	PMAA_065510	100.m008860	cation diffusion facilitator 1
7023694	XM_002145953.1	XP_002145989.1	PMAA_065520	100.m008861	conserved hypothetical protein
7023694	XM_002145954.1	XP_002145990.1	PMAA_065520	100.m008861	conserved hypothetical protein
7023695	XM_002145955.1	XP_002145991.1	PMAA_065530	100.m008862	60S ribosomal protein L17
7023696	XM_002145956.1	XP_002145992.1	PMAA_065540	100.m008863	hydroxyisocaproate dehydrogenase, putative
7023697	XM_002145957.1	XP_002145993.1	PMAA_065550	100.m008864	zinc-dependent alcohol dehydrogenase, putative
7023698	XM_002145958.1	XP_002145994.1	PMAA_065560	100.m008865	3-ketoacyl-acyl carrier protein reductase, putative
7023699	XM_002145959.1	XP_002145995.1	PMAA_065570	100.m008866	C6 transcription factor, putative
7023700	XM_002145960.1	XP_002145996.1	PMAA_065580	100.m008867	2-deoxy-D-gluconate 3-dehydrogenase, putative
7023701	XM_002145961.1	XP_002145997.1	PMAA_065590	100.m008868	metalloreductase, putative
7023702	XM_002145962.1	XP_002145998.1	PMAA_065600	100.m008869	UBX domain protein
7023703	XM_002145963.1	XP_002145999.1	PMAA_065610	100.m008870	poly(A)-binding protein-dependent poly(A) ribonuclease, putative
7023703	XM_002145964.1	XP_002146000.1	PMAA_065610	100.m008870	poly(A)-binding protein-dependent poly(A) ribonuclease, putative
7023704	XM_002145965.1	XP_002146001.1	PMAA_065620	100.m008871	small nuclear ribonucleoprotein (LSM7), putative
7023705	XM_002145966.1	XP_002146002.1	PMAA_065630	100.m008872	C6 finger domain protein, putative
7023706	XM_002145967.1	XP_002146003.1	PMAA_065640	100.m008873	catechol dioxygenase, putative
7023707	XM_002145968.1	XP_002146004.1	PMAA_065650	100.m008874	TGF beta receptor associated protein 1, putative
7023708	XM_002145969.1	XP_002146005.1	PMAA_065660	100.m008875	Golgi membrane protein (Coy1), putative
7023709	XM_002145970.1	XP_002146006.1	PMAA_065670	100.m008876	mitochondrial processing peptidase beta subunit, putative
7023710	XM_002145971.1	XP_002146007.1	PMAA_065680	100.m008877	nucleoside-diphosphate-sugar epimerase, putative
7023711	XM_002145972.1	XP_002146008.1	PMAA_065690	100.m008878	monooxygenase, putative
7023712	XM_002145973.1	XP_002146009.1	PMAA_065700	100.m008879	fibrillarin
7023713	XM_002145974.1	XP_002146010.1	PMAA_065710	100.m008880	conserved fungal protein
7023714	XM_002145975.1	XP_002146011.1	PMAA_065720	100.m008881	oxidoreductase, zinc-binding dehydrogenase family, putative
7023715	XM_002145976.1	XP_002146012.1	PMAA_065730	100.m008882	succinate dehydrogenase subunit CybS, putative
7023715	XM_002145977.1	XP_002146013.1	PMAA_065730	100.m008882	succinate dehydrogenase subunit CybS, putative
7023716	XM_002145978.1	XP_002146014.1	PMAA_065740	100.m008883	acetylserotonin methytransferase-like protein (ASMTL), putative
7023717	XM_002145979.1	XP_002146015.1	PMAA_065750	100.m008884	conserved hypothetical protein
7023718	XM_002145980.1	XP_002146016.1	PMAA_065760	100.m008885	protein max, putative
7023719	XM_002145981.1	XP_002146017.1	PMAA_065770	100.m008886	hypothetical protein
7023720	XM_002145982.1	XP_002146018.1	PMAA_065780	100.m008887	conserved hypothetical protein
7023721	XM_002145983.1	XP_002146019.1	PMAA_065790	100.m008888	C6 finger domain protein, putative
7023722	XM_002145984.1	XP_002146020.1	PMAA_065800	100.m008889	conserved hypothetical protein
7023723	XM_002145985.1	XP_002146021.1	PMAA_065810	100.m008890	conserved hypothetical protein
7023724	XM_002145986.1	XP_002146022.1	PMAA_065820	100.m008891	anaphase-promoting complex component Cut20/Apc4, putative
7023725	XM_002145987.1	XP_002146023.1	PMAA_065830	100.m008892	importin beta-1 subunit
7023726	XM_002145988.1	XP_002146024.1	PMAA_065840	100.m008893	40S ribosomal protein S22
7023726	XM_002145989.1	XP_002146025.1	PMAA_065840	100.m008893	40S ribosomal protein S22
7023727	XM_002145990.1	XP_002146026.1	PMAA_065850	100.m008894	phosphoglycerate mutase family protein
7023728	XM_002145991.1	XP_002146027.1	PMAA_065860	100.m008895	hypothetical protein
7023729	XM_002145992.1	XP_002146028.1	PMAA_065870	100.m008896	conserved hypothetical protein
7023730	XM_002145993.1	XP_002146029.1	PMAA_065880	100.m008897	conserved fungal protein
7023731	XM_002145994.1	XP_002146030.1	PMAA_065890	100.m008898	phosphatidylserine decarboxylase, putative
7023732	XM_002145995.1	XP_002146031.1	PMAA_065900	100.m008899	conserved hypothetical protein
7023733	XM_002145996.1	XP_002146032.1	PMAA_065910	100.m008900	anaphase promoting complex subunit 10 (APC10), putative
7023734	XM_002145997.1	XP_002146033.1	PMAA_065920	100.m008901	3-isopropylmalate dehydrogenase Leu2A
7023735	XM_002145998.1	XP_002146034.1	PMAA_065930	100.m008902	CDP-diacylglycerol-inositol 3-phosphatidyltransferase PIS
7023736	XM_002145999.1	XP_002146035.1	PMAA_065940	100.m008903	transferase family protein
7023737	XM_002146000.1	XP_002146036.1	PMAA_065950	100.m008904	MFS toxin efflux pump (AflT), putative
7023738	XM_002146001.1	XP_002146037.1	PMAA_065960	100.m008905	siderochrome-iron transporter, putative
7023739	XM_002146002.1	XP_002146038.1	PMAA_065970	100.m008906	conserved hypothetical protein
7023740	XM_002146003.1	XP_002146039.1	PMAA_065980	100.m008907	RNA splicing factor (Pad-1), putative
7023741	XM_002146004.1	XP_002146040.1	PMAA_065990	100.m008908	fatty acid hydroxylase, putative
7023742	XM_002146005.1	XP_002146041.1	PMAA_066000	100.m008909	conserved hypothetical protein
7023743	XM_002146006.1	XP_002146042.1	PMAA_066010	100.m008910	C6 transcription factor, putative
7023744	XM_002146007.1	XP_002146043.1	PMAA_066020	100.m008911	conserved hypothetical protein
7023745	XM_002146008.1	XP_002146044.1	PMAA_066030	100.m008913	Coatomer subunit delta, putative
7023746	XM_002146009.1	XP_002146045.1	PMAA_066040	100.m008914	conserved glutamic acid-rich protein
7023747	XM_002146010.1	XP_002146046.1	PMAA_066050	100.m008915	DUF803 domain membrane protein
7023748	XM_002146011.1	XP_002146047.1	PMAA_066060	100.m008916	hypothetical protein
7023749	XM_002146012.1	XP_002146048.1	PMAA_066070	100.m008917	SacI domain protein
7023750	XM_002146013.1	XP_002146049.1	PMAA_066080	100.m008918	importin beta-2 subunit, putative
7023751	XM_002146014.1	XP_002146050.1	PMAA_066090	100.m008919	conserved hypothetical protein
7023752	XM_002146015.1	XP_002146051.1	PMAA_066100	100.m008920	flavin-binding monooxygenase, putative
7023753	XM_002146016.1	XP_002146052.1	PMAA_066110	100.m008921	oxidoreductase, zinc-binding dehydrogenase family, putative
7023754	XM_002146017.1	XP_002146053.1	PMAA_066120	100.m008922	C6 transcription factor RosA-like, putative
7023755	XM_002146018.1	XP_002146054.1	PMAA_066130	100.m008923	ubiquitin hydrolase, putative
7023756	XM_002146019.1	XP_002146055.1	PMAA_066140	100.m008924	choline kinase, putative
7023757	XM_002146020.1	XP_002146056.1	PMAA_066150	100.m008925	hypothetical protein
7023758	XM_002146021.1	XP_002146057.1	PMAA_066160	100.m008926	Auxin Efflux Carrier superfamily
7023758	XM_002146022.1	XP_002146058.1	PMAA_066160	100.m008926	Auxin Efflux Carrier superfamily
7023759	XM_002146023.1	XP_002146059.1	PMAA_066170	100.m008927	MAP kinase kinase (Pbs2), putative
7023760	XM_002146024.1	XP_002146060.1	PMAA_066180	100.m008928	glutathione oxidoreductase Glr1, putative
7023761	XM_002146025.1	XP_002146061.1	PMAA_066190	100.m008929	MFS transporter, putative
7023762	XM_002146026.1	XP_002146062.1	PMAA_066200	100.m008930	conserved hypothetical protein
7023763	XM_002146027.1	XP_002146063.1	PMAA_066210	100.m008931	conidiation-specific protein, putative
7023764	XM_002146028.1	XP_002146064.1	PMAA_066220	100.m008932	glucan endo-1,3-beta-glucosidase precursor, putative
7023765	XM_002146029.1	XP_002146065.1	PMAA_066230	100.m008933	hypothetical protein
7023766	XM_002146030.1	XP_002146066.1	PMAA_066240	100.m008934	alcohol dehydrogenase, putative
7023767	XM_002146031.1	XP_002146067.1	PMAA_066250	100.m008935	conserved hypothetical protein
7023768	XM_002146032.1	XP_002146068.1	PMAA_066260	100.m008936	conserved hypothetical protein
7023769	XM_002146033.1	XP_002146069.1	PMAA_066270	100.m008937	threonyl-tRNA synthetase
7023770	XM_002146034.1	XP_002146070.1	PMAA_066280	100.m008938	conserved hypothetical protein
7023771	XM_002146035.1	XP_002146071.1	PMAA_066290	100.m008939	conserved hypothetical protein
7023772	XM_002146036.1	XP_002146072.1	PMAA_066300	100.m008940	benzoate 4-monooxygenase cytochrome P450, putative
7023773	XM_002146037.1	XP_002146073.1	PMAA_066310	100.m008941	hypothetical protein
7023774	XM_002146038.1	XP_002146074.1	PMAA_066320	100.m008942	UDP-glucose,sterol transferase, putative
7023775	XM_002146039.1	XP_002146075.1	PMAA_066330	100.m008943	xylitol dehydrogenase XdhB
7023776	XM_002146040.1	XP_002146076.1	PMAA_066340	100.m008944	extracellular cell wall glucanase Crf1/allergen Asp F9
7023777	XM_002146041.1	XP_002146077.1	PMAA_066350	100.m008945	C6 transcription factor, putative
7023778	XM_002146042.1	XP_002146078.1	PMAA_066360	100.m008946	valacyclovir hydrolase, putative
7023779	XM_002146043.1	XP_002146079.1	PMAA_066370	100.m008947	conserved hypothetical protein
7023780	XM_002146044.1	XP_002146080.1	PMAA_066380	100.m008948	mitochondrial F1F0-ATP synthase g subunit, putative
7023781	XM_002146045.1	XP_002146081.1	PMAA_066390	100.m008949	ATP dependent RNA helicase (Rok1), putative
7023782	XM_002146046.1	XP_002146082.1	PMAA_066400	100.m008950	hypothetical protein
7023783	XM_002146047.1	XP_002146083.1	PMAA_066410	100.m008951	glucose-inducible SAM-dependent methyltransferase Rrg1, putative
7023784	XM_002146048.1	XP_002146084.1	PMAA_066420	100.m008952	vacuolar protein sorting-associated protein Vps28, putative
7023785	XM_002146049.1	XP_002146085.1	PMAA_066430	100.m008953	ribosome assembly protein Noc2, putative
7023786	XM_002146050.1	XP_002146086.1	PMAA_066440	100.m008954	potassium transporter, putative
7023787	XM_002146051.1	XP_002146087.1	PMAA_066450	100.m008955	class III chitinase ChiA2
7023788	XM_002146052.1	XP_002146088.1	PMAA_066460	100.m008956	ABC ATPase, putative
7023789	XM_002146053.1	XP_002146089.1	PMAA_066470	100.m008957	molybdopterin cofactor biosynthetic protein
7023790	XM_002146054.1	XP_002146090.1	PMAA_066480	100.m008958	BTB/POZ domain protein
7023791	XM_002146055.1	XP_002146091.1	PMAA_066490	100.m008959	GNAT family acetyltransferase, putative
7023792	XM_002146056.1	XP_002146092.1	PMAA_066500	100.m008960	bZIP transcription factor (LziP), putative
7023793	XM_002146057.1	XP_002146093.1	PMAA_066510	100.m008961	pogo transposable element, putative
7023794	XM_002146058.1	XP_002146094.1	PMAA_066520	100.m008962	short-chain dehydrogenase/reductase, putative
7023795	XM_002146059.1	XP_002146095.1	PMAA_066530	100.m008963	C6 transcription factor, putative
7023796	XM_002146060.1	XP_002146096.1	PMAA_066540	100.m008964	tRNA processing endoribonuclease Trz1, putative
7023797	XM_002146061.1	XP_002146097.1	PMAA_066550	100.m008965	nuclear migration protein NudF
7023798	XM_002146062.1	XP_002146098.1	PMAA_066560	100.m008966	acid phosphatase, putative
7023798	XM_002146063.1	XP_002146099.1	PMAA_066560	100.m008966	acid phosphatase, putative
7023799	XM_002146064.1	XP_002146100.1	PMAA_066570	100.m008967	prolyl 4-hydroxylase alpha subunit, putative
7023800	XM_002146065.1	XP_002146101.1	PMAA_066580	100.m008968	hypothetical protein
7023801	XM_002146066.1	XP_002146102.1	PMAA_066590	100.m008969	conserved hypothetical protein
7023802	XM_002146067.1	XP_002146103.1	PMAA_066600	100.m008970	conserved hypothetical protein
7023803	XM_002146068.1	XP_002146104.1	PMAA_066610	100.m008971	hypothetical protein
7023804	XM_002146069.1	XP_002146105.1	PMAA_066620	100.m008972	conserved hypothetical protein
7023805	XM_002146070.1	XP_002146106.1	PMAA_066630	100.m008973	lipase, putative
7023806	XM_002146071.1	XP_002146107.1	PMAA_066640	100.m008974	small monomeric GTPase (Gtr2), putative
7023807	XM_002146072.1	XP_002146108.1	PMAA_066650	100.m008975	heme/steroid binding domain protein, putative
7023808	XM_002146073.1	XP_002146109.1	PMAA_066660	100.m008976	40S ribosomal protein S25, putative
7023809	XM_002146074.1	XP_002146110.1	PMAA_066670	100.m008977	polyketide synthase, putative
7023810	XM_002146075.1	XP_002146111.1	PMAA_066680	100.m008978	ABC transporter, putative
7023811	XM_002146076.1	XP_002146112.1	PMAA_066690	100.m008979	UDP-glucosyl transferase family protein
7023812	XM_002146077.1	XP_002146113.1	PMAA_066700	100.m008980	conserved hypothetical protein
7023813	XM_002146078.1	XP_002146114.1	PMAA_066710	100.m008981	conserved hypothetical protein
7023814	XM_002146079.1	XP_002146115.1	PMAA_066720	100.m008982	polyketide synthase, putative
7023815	XM_002146080.1	XP_002146116.1	PMAA_066730	100.m008983	WD40 domain protein
7023816	XM_002146081.1	XP_002146117.1	PMAA_066740	100.m008984	dihydrouridine synthase family protein, putative
7023817	XM_002146082.1	XP_002146118.1	PMAA_066750	100.m008985	muramidase, putative
7023818	XM_002146083.1	XP_002146119.1	PMAA_066760	100.m008986	aldo/keto reductase, putative
7023819	XM_002146084.1	XP_002146120.1	PMAA_066770	100.m008987	inositol monophosphatase QutG, putative
7023820	XM_002146085.1	XP_002146121.1	PMAA_066780	100.m008988	hypothetical protein
7023821	XM_002146086.1	XP_002146122.1	PMAA_066790	100.m008989	conserved hypothetical protein
7023822	XM_002146087.1	XP_002146123.1	PMAA_066800	100.m008990	conserved hypothetical protein
7023823	XM_002146088.1	XP_002146124.1	PMAA_066810	100.m008991	DSBA-like thioredoxin domain protein
7023824	XM_002146089.1	XP_002146125.1	PMAA_066820	100.m008992	glucokinase, putative
7023825	XM_002146090.1	XP_002146126.1	PMAA_066830	100.m008993	conserved hypothetical protein
7023826	XM_002146091.1	XP_002146127.1	PMAA_066840	100.m008994	glucosamine-6-phosphate isomerase, putative
7023827	XM_002146092.1	XP_002146128.1	PMAA_066850	100.m008995	choline transporter Hnm1, putative
7023828	XM_002146093.1	XP_002146129.1	PMAA_066860	100.m008996	conserved hypothetical protein
7023829	XM_002146094.1	XP_002146130.1	PMAA_066870	100.m008997	conserved hypothetical protein
7023830	XM_002146095.1	XP_002146131.1	PMAA_066880	100.m008998	Leucine carboxyl methyltransferase superfamily
7023831	XM_002146096.1	XP_002146132.1	PMAA_066890	100.m008999	RING zinc finger protein, putative
7023832	XM_002146097.1	XP_002146133.1	PMAA_066900	100.m009000	TFIIH complex helicase Rad3, putative
7023833	XM_002146098.1	XP_002146134.1	PMAA_066910	100.m009001	DNA-directed RNA polymerase I subunit (Rpa190), putative
7023834	XM_002146099.1	XP_002146135.1	PMAA_066920	100.m009002	U4/U6 small nuclear ribonucleoprotein, putative
7023835	XM_002146100.1	XP_002146136.1	PMAA_066930	100.m009003	snoRNP assembly factor Naf1, putative
7023836	XM_002146101.1	XP_002146137.1	PMAA_066940	100.m009004	alpha-1,2-mannosyltransferase (Alg9), putative
7024803	XM_002146102.1	XP_002146138.1	PMAA_066970	100.m009005	D-isomer specific 2-hydroxyacid dehydrogenase family protein
7023838	XM_002146103.1	XP_002146139.1	PMAA_066980	100.m009006	conserved hypothetical protein
7023839	XM_002146104.1	XP_002146140.1	PMAA_066990	100.m009007	conserved hypothetical protein
7023839	XM_002146105.1	XP_002146141.1	PMAA_066990	100.m009007	conserved hypothetical protein
7023840	XM_002146106.1	XP_002146142.1	PMAA_067000	100.m009008	WD repeat protein
7023841	XM_002146107.1	XP_002146143.1	PMAA_067010	100.m009009	centrin-binding protein Sfi1, putative
7023842	XM_002146108.1	XP_002146144.1	PMAA_067020	100.m009010	conserved hypothetical protein
7023843	XM_002146109.1	XP_002146145.1	PMAA_067030	100.m009011	isoleucyl-tRNA synthetase ,cytoplasmic
7023844	XM_002146110.1	XP_002146146.1	PMAA_067040	100.m009012	intracellular protein transport protein (UsoA), putative
7023845	XM_002146111.1	XP_002146147.1	PMAA_067050	100.m009013	5'-3' exoribonculease Dhp1
7023846	XM_002146112.1	XP_002146148.1	PMAA_067060	100.m009014	3-dehydroquinate synthase, putative
7023847	XM_002146113.1	XP_002146149.1	PMAA_067070	100.m009015	C2H2 transcription factor (Rpn4), putative
7023848	XM_002146114.1	XP_002146150.1	PMAA_067080	100.m009016	histone H4.1
7023849	XM_002146115.1	XP_002146151.1	PMAA_067090	100.m009017	histone H3
7023850	XM_002146116.1	XP_002146152.1	PMAA_067100	100.m009018	MFS multidrug transporter, putative
7023851	XM_002146117.1	XP_002146153.1	PMAA_067110	100.m009019	integral membrane protein, Mpv17/PMP22 family, putative
7023852	XM_002146118.1	XP_002146154.1	PMAA_067120	100.m009020	conserved hypothetical protein
7023853	XM_002146119.1	XP_002146155.1	PMAA_067130	100.m009021	conserved hypothetical protein
7024804	XM_002146120.1	XP_002146156.1	PMAA_067150	100.m009022	oligopeptide transporter, OPT family, putative
7023855	XM_002146121.1	XP_002146157.1	PMAA_067160	100.m009023	SH3 domain protein
7023856	XM_002146122.1	XP_002146158.1	PMAA_067170	100.m009024	cell division protein kinase (Ctk1), putative
7023856	XM_002146123.1	XP_002146159.1	PMAA_067170	100.m009024	cell division protein kinase (Ctk1), putative
7023857	XM_002146124.1	XP_002146160.1	PMAA_067180	100.m009025	conserved hypothetical protein
7023858	XM_002146125.1	XP_002146161.1	PMAA_067190	100.m009026	M protein repeat protein
7023859	XM_002146126.1	XP_002146162.1	PMAA_067200	100.m009027	small nuclear ribonucleoprotein complex protein Nhp2, putative
7023860	XM_002146127.1	XP_002146163.1	PMAA_067210	100.m009028	60S ribosomal protein L30, putative
7023860	XM_002146128.1	XP_002146164.1	PMAA_067210	100.m009028	60S ribosomal protein L30, putative
7023861	XM_002146129.1	XP_002146165.1	PMAA_067220	100.m009029	hypothetical protein
7023862	XM_002146130.1	XP_002146166.1	PMAA_067230	100.m009030	conserved hypothetical protein
7023863	XM_002146131.1	XP_002146167.1	PMAA_067240	100.m009031	conserved hypothetical protein
7023864	XM_002146132.1	XP_002146168.1	PMAA_067250	100.m009032	GTP-binding protein
7023865	XM_002146133.1	XP_002146169.1	PMAA_067260	100.m009033	conserved hypothetical protein
7023866	XM_002146134.1	XP_002146170.1	PMAA_067270	100.m009034	SET domain protein
7023867	XM_002146135.1	XP_002146171.1	PMAA_067280	100.m009035	C6 transcription factor FacB/Cat8
7023868	XM_002146136.1	XP_002146172.1	PMAA_067290	100.m009036	conserved hypothetical protein
7023869	XM_002146137.1	XP_002146173.1	PMAA_067300	100.m009037	transketolase TktA
7023870	XM_002146138.1	XP_002146174.1	PMAA_067310	100.m009038	spermidine synthase
7023870	XM_002146139.1	XP_002146175.1	PMAA_067310	100.m009038	spermidine synthase
7023870	XM_002146140.1	XP_002146176.1	PMAA_067310	100.m009038	spermidine synthase
7023871	XM_002146141.1	XP_002146177.1	PMAA_067320	100.m009039	ubiquinol-cytochrome C reductase complex subunit UcrQ, putative
7023872	XM_002146142.1	XP_002146178.1	PMAA_067330	100.m009040	prohibitin complex subunit Phb1, putative
7023873	XM_002146143.1	XP_002146179.1	PMAA_067340	100.m009041	conserved hypothetical protein
7023874	XM_002146144.1	XP_002146180.1	PMAA_067350	100.m009042	cell wall proline rich protein, putative
7023875	XM_002146145.1	XP_002146181.1	PMAA_067360	100.m009043	esterase/lipase, putative
7023876	XM_002146146.1	XP_002146182.1	PMAA_067370	100.m009044	aflatoxin B1-aldehyde reductase GliO-like, putative
7023877	XM_002146147.1	XP_002146183.1	PMAA_067380	100.m009045	conserved hypothetical protein
7023878	XM_002146148.1	XP_002146184.1	PMAA_067390	100.m009046	hydantoin racemase (Dcg1), putative
7023879	XM_002146149.1	XP_002146185.1	PMAA_067400	100.m009047	gamma tubulin MipA, putative
7023880	XM_002146150.1	XP_002146186.1	PMAA_067410	100.m009048	conserved hypothetical protein
7023880	XM_002146151.1	XP_002146187.1	PMAA_067410	100.m009048	conserved hypothetical protein
7023880	XM_002146152.1	XP_002146188.1	PMAA_067410	100.m009048	conserved hypothetical protein
7023880	XM_002146153.1	XP_002146189.1	PMAA_067410	100.m009048	conserved hypothetical protein
7023881	XM_002146154.1	XP_002146190.1	PMAA_067420	100.m009049	phosphotyrosyl phosphatase activator
7023882	XM_002146155.1	XP_002146191.1	PMAA_067430	100.m009050	nuclear protein, putative
7023883	XM_002146156.1	XP_002146192.1	PMAA_067440	100.m009051	conserved hypothetical protein
7023883	XM_002146157.1	XP_002146193.1	PMAA_067440	100.m009051	conserved hypothetical protein
7023884	XM_002146158.1	XP_002146194.1	PMAA_067450	100.m009052	DUF6 domain protein, putative
7024808	XM_002146159.1	XP_002146195.1	PMAA_067490	100.m009053	Arp2/3 complex subunit (Arp2), putative
7023886	XM_002146160.1	XP_002146196.1	PMAA_067500	100.m009054	6-phosphogluconate dehydrogenase family protein
7023887	XM_002146161.1	XP_002146197.1	PMAA_067510	100.m009055	bZIP transcription factor, putative
7023888	XM_002146162.1	XP_002146198.1	PMAA_067520	100.m009056	GTP cyclohydrolase II, putative
7023889	XM_002146163.1	XP_002146199.1	PMAA_067530	100.m009057	SAGA complex component (Sgf29), putative
7023889	XM_002146164.1	XP_002146200.1	PMAA_067530	100.m009057	SAGA complex component (Sgf29), putative
7023889	XM_002146165.1	XP_002146201.1	PMAA_067530	100.m009057	SAGA complex component (Sgf29), putative
7023890	XM_002146166.1	XP_002146202.1	PMAA_067540	100.m009058	mannose-6-phosphate isomerase, class I
7023891	XM_002146167.1	XP_002146203.1	PMAA_067550	100.m009059	Coatomer subunit epsilon, putative
7023892	XM_002146168.1	XP_002146204.1	PMAA_067560	100.m009060	hypothetical protein
7023893	XM_002146169.1	XP_002146205.1	PMAA_067570	100.m009061	conserved hypothetical protein
7023894	XM_002146170.1	XP_002146206.1	PMAA_067580	100.m009062	conserved hypothetical protein
7023895	XM_002146171.1	XP_002146207.1	PMAA_067590	100.m009063	hypothetical protein
7023896	XM_002146172.1	XP_002146208.1	PMAA_067600	100.m009064	conserved hypothetical protein
7023897	XM_002146173.1	XP_002146209.1	PMAA_067610	100.m009066	1-phosphatidylinositol-4,5-bisphosphate phosphodiesterase Plc1, putative
7023898	XM_002146174.1	XP_002146210.1	PMAA_067620	100.m009067	nonsense transcript regulator, putative
7023899	XM_002146175.1	XP_002146211.1	PMAA_067630	100.m009068	U3 small nucleolar ribonucleoprotein protein IMP4, putative
7023900	XM_002146176.1	XP_002146212.1	PMAA_067640	100.m009069	BRCT domain protein
7023901	XM_002146177.1	XP_002146213.1	PMAA_067650	100.m009070	anthranilate synthase multifunctional protein TrpC, putative
7023902	XM_002146178.1	XP_002146214.1	PMAA_067660	100.m009071	nucleoporin (Nup184), putative
7023903	XM_002146179.1	XP_002146215.1	PMAA_067670	100.m009072	G-protein complex alpha subunit GpaA/FadA
7023903	XM_002146180.1	XP_002146216.1	PMAA_067670	100.m009072	G-protein complex alpha subunit GpaA/FadA
7023904	XM_002146181.1	XP_002146217.1	PMAA_067680	100.m009073	conserved hypothetical protein
7023905	XM_002146182.1	XP_002146218.1	PMAA_067690	100.m009074	conserved hypothetical protein
7023906	XM_002146183.1	XP_002146219.1	PMAA_067700	100.m009075	hypothetical protein
7023907	XM_002146184.1	XP_002146220.1	PMAA_067710	100.m009076	hypothetical protein
7023908	XM_002146185.1	XP_002146221.1	PMAA_067720	100.m009077	Smr domain protein
7023909	XM_002146186.1	XP_002146222.1	PMAA_067730	100.m009078	geranylgeranyl diphosphate synthase
7023910	XM_002146187.1	XP_002146223.1	PMAA_067740	100.m009079	cell division control protein 14
7023911	XM_002146188.1	XP_002146224.1	PMAA_067750	100.m009080	cytoskeletal adaptor protein SagA
7023912	XM_002146189.1	XP_002146225.1	PMAA_067760	100.m009081	SNF2 family helicase/ATPase PasG, putative
7023913	XM_002146190.1	XP_002146226.1	PMAA_067770	100.m009082	conserved hypothetical protein
7023914	XM_002146191.1	XP_002146227.1	PMAA_067780	100.m009083	possible dual specificity protein phosphatase 3
7023915	XM_002146192.1	XP_002146228.1	PMAA_067790	100.m009084	C2H2 transcription factor, putative
7023916	XM_002146193.1	XP_002146229.1	PMAA_067800	100.m009085	conserved hypothetical protein
7023917	XM_002146194.1	XP_002146230.1	PMAA_067810	100.m009086	hypothetical protein
7023918	XM_002146195.1	XP_002146231.1	PMAA_067820	100.m009087	adenosine deaminase, putative
7023919	XM_002146196.1	XP_002146232.1	PMAA_067830	100.m009088	conserved hypothetical protein
7023920	XM_002146197.1	XP_002146233.1	PMAA_067840	100.m009089	uridine permease Fui1, putative
7023921	XM_002146198.1	XP_002146234.1	PMAA_067850	100.m009090	conserved hypothetical protein
7023922	XM_002146199.1	XP_002146235.1	PMAA_067860	100.m009091	DUF543 domain protein
7023923	XM_002146200.1	XP_002146236.1	PMAA_067870	100.m009092	copper-activated transcription factor GRISEA, putative
7023924	XM_002146201.1	XP_002146237.1	PMAA_067880	100.m009093	mitochondrial outer membrane protein (Sam35), putative
7023925	XM_002146202.1	XP_002146238.1	PMAA_067890	100.m009094	conserved hypothetical protein
7023926	XM_002146203.1	XP_002146239.1	PMAA_067900	100.m009095	conserved hypothetical protein
7023927	XM_002146204.1	XP_002146240.1	PMAA_067910	100.m009096	conserved hypothetical protein
7023928	XM_002146205.1	XP_002146241.1	PMAA_067920	100.m009097	conserved hypothetical protein
7023929	XM_002146206.1	XP_002146242.1	PMAA_067930	100.m009098	conserved hypothetical protein
7023930	XM_002146207.1	XP_002146243.1	PMAA_067940	100.m009099	conserved hypothetical protein
7023931	XM_002146208.1	XP_002146244.1	PMAA_067950	100.m009100	SCF ubiquitin ligase complex subunit CulA, putative
7023932	XM_002146209.1	XP_002146245.1	PMAA_067960	100.m009101	glycogen phosphorylase GlpV/Gph1, putative
7023933	XM_002146210.1	XP_002146246.1	PMAA_067970	100.m009102	G protein complex alpha subunit GpaB
7023934	XM_002146211.1	XP_002146247.1	PMAA_067980	100.m009103	MAP kinase SakA
7023934	XM_002146212.1	XP_002146248.1	PMAA_067980	100.m009103	MAP kinase SakA
7023935	XM_002146213.1	XP_002146249.1	PMAA_067990	100.m009104	Avl9 protein, putative
7023936	XM_002146214.1	XP_002146250.1	PMAA_068000	100.m009105	ABC fatty acid transporter, putative
7023937	XM_002146215.1	XP_002146251.1	PMAA_068010	100.m009106	conserved hypothetical protein
7023938	XM_002146216.1	XP_002146252.1	PMAA_068020	100.m009107	conserved hypothetical protein
7023939	XM_002146217.1	XP_002146253.1	PMAA_068030	100.m009108	cell wall biogenesis protein Mhp1, putative
7023940	XM_002146218.1	XP_002146254.1	PMAA_068040	100.m009109	60S ribosomal protein L5, putative
7023941	XM_002146219.1	XP_002146255.1	PMAA_068050	100.m009110	epoxide hydrolase, putative
7023941	XM_002146220.1	XP_002146256.1	PMAA_068050	100.m009110	epoxide hydrolase, putative
7023942	XM_002146221.1	XP_002146257.1	PMAA_068060	100.m009111	conserved hypothetical protein
7023943	XM_002146222.1	XP_002146258.1	PMAA_068070	100.m009112	conserved hypothetical protein
7023944	XM_002146223.1	XP_002146259.1	PMAA_068080	100.m009113	conserved hypothetical protein
7023945	XM_002146224.1	XP_002146260.1	PMAA_068090	100.m009114	high affinity nitrate transporter NrtB
7023946	XM_002146225.1	XP_002146261.1	PMAA_068100	100.m009115	nitrite reductase NiiA
7023947	XM_002146226.1	XP_002146262.1	PMAA_068110	100.m009116	nitrate reductase NiaD
7023948	XM_002146227.1	XP_002146263.1	PMAA_068120	100.m009117	gamma-tubulin complex component GCP6, putative
7023949	XM_002146228.1	XP_002146264.1	PMAA_068130	100.m009118	conserved hypothetical protein
7023950	XM_002146229.1	XP_002146265.1	PMAA_068140	100.m009119	isocitrate dehydrogenase, NAD-dependent
7023951	XM_002146230.1	XP_002146266.1	PMAA_068150	100.m009120	Exocyst complex component Sec5, putative
7023952	XM_002146231.1	XP_002146267.1	PMAA_068160	100.m009121	conserved hypothetical protein
7023953	XM_002146232.1	XP_002146268.1	PMAA_068170	100.m009122	conserved hypothetical protein
7023954	XM_002146233.1	XP_002146269.1	PMAA_068180	100.m009123	adenylyl cyclase-associated protein (cap)
7023955	XM_002146234.1	XP_002146270.1	PMAA_068190	100.m009124	PfkB family carbohydrate kinase (Mak32), putative
7023956	XM_002146235.1	XP_002146271.1	PMAA_068200	100.m009125	conserved hypothetical protein
7023957	XM_002146236.1	XP_002146272.1	PMAA_068210	100.m009126	60S ribosomal protein L3
7023958	XM_002146237.1	XP_002146273.1	PMAA_068220	100.m009127	PBSP domain protein
7023959	XM_002146238.1	XP_002146274.1	PMAA_068230	100.m009128	conserved hypothetical protein
7023960	XM_002146239.1	XP_002146275.1	PMAA_068240	100.m009129	Rho GTPase activator Rga, putative
7023961	XM_002146240.1	XP_002146276.1	PMAA_068250	100.m009130	conserved hypothetical protein
7023962	XM_002146241.1	XP_002146277.1	PMAA_068260	100.m009131	conserved hypothetical protein
7023962	XM_002146242.1	XP_002146278.1	PMAA_068260	100.m009131	conserved hypothetical protein
7023963	XM_002146243.1	XP_002146279.1	PMAA_068270	100.m009132	valacyclovir hydrolase, putative
7023964	XM_002146244.1	XP_002146280.1	PMAA_068280	100.m009133	mannosylphosphate transferase (Mnn4), putative
7023965	XM_002146245.1	XP_002146281.1	PMAA_068290	100.m009134	zinc metalloproteinase, putative
7023966	XM_002146246.1	XP_002146282.1	PMAA_068300	100.m009135	3-ketoacyl-CoA ketothiolase (Kat1), putative
7023967	XM_002146247.1	XP_002146283.1	PMAA_068310	100.m009136	Hsp70 chaperone Hsp88
7023968	XM_002146248.1	XP_002146284.1	PMAA_068320	100.m009137	chitin synthase D
7023969	XM_002146249.1	XP_002146285.1	PMAA_068330	100.m009138	RNA-binding La domain protein
7023970	XM_002146250.1	XP_002146286.1	PMAA_068340	100.m009139	hypothetical protein
7023971	XM_002146251.1	XP_002146287.1	PMAA_068350	100.m009140	conserved hypothetical protein
7023972	XM_002146252.1	XP_002146288.1	PMAA_068360	100.m009141	polyketide synthase, putative
7023973	XM_002146253.1	XP_002146289.1	PMAA_068370	100.m009142	glycogen branching enzyme GbeA, putative
7023974	XM_002146254.1	XP_002146290.1	PMAA_068380	100.m009143	proline permease PrnB
7023975	XM_002146255.1	XP_002146291.1	PMAA_068390	100.m009144	jumonji family transcription factor, putative
7023976	XM_002146256.1	XP_002146292.1	PMAA_068400	100.m009145	GABA permease, putative
7023977	XM_002146257.1	XP_002146293.1	PMAA_068410	100.m009146	conserved hypothetical protein
7023978	XM_002146258.1	XP_002146294.1	PMAA_068420	100.m009147	nuclear RNA binding protein, putative
7023979	XM_002146259.1	XP_002146295.1	PMAA_068430	100.m009148	sexual development activator VeA
7023980	XM_002146260.1	XP_002146296.1	PMAA_068440	100.m009149	DNA repair protein (Rad57), putative
7023981	XM_002146261.1	XP_002146297.1	PMAA_068450	100.m009150	oleate delta-12 desaturase
7023982	XM_002146262.1	XP_002146298.1	PMAA_068460	100.m009151	conserved hypothetical protein
7023983	XM_002146263.1	XP_002146299.1	PMAA_068470	100.m009152	TMEM1 family protein, putative
7023984	XM_002146264.1	XP_002146300.1	PMAA_068480	100.m009153	membrane-tethered transcription factor (SPT23), putative
7023985	XM_002146265.1	XP_002146301.1	PMAA_068490	100.m009154	hypothetical protein
7023986	XM_002146266.1	XP_002146302.1	PMAA_068500	100.m009155	endoglucanase, putative
7023987	XM_002146267.1	XP_002146303.1	PMAA_068510	100.m009156	RNA binding protein Ligatin/Tma64, putative
7023988	XM_002146268.1	XP_002146304.1	PMAA_068520	100.m009157	carnitine acetyl transferase
7023989	XM_002146269.1	XP_002146305.1	PMAA_068530	100.m009158	alpha-1,2-mannosidase family protein
7023990	XM_002146270.1	XP_002146306.1	PMAA_068540	100.m009159	UPF0160 domain protein MYG1, putative
7023991	XM_002146271.1	XP_002146307.1	PMAA_068550	100.m009160	conserved hypothetical protein
7023992	XM_002146272.1	XP_002146308.1	PMAA_068560	100.m009161	Ras GTPase Rab11, putative
7023992	XM_002146273.1	XP_002146309.1	PMAA_068560	100.m009161	Ras GTPase Rab11, putative
7023993	XM_002146274.1	XP_002146310.1	PMAA_068570	100.m009162	conserved hypothetical protein
7023994	XM_002146275.1	XP_002146311.1	PMAA_068580	100.m009163	3-oxoacyl-[acyl-carrier-protein] synthase, putative
7023995	XM_002146276.1	XP_002146312.1	PMAA_068590	100.m009164	fatty acid synthase subunit beta, putative
7023996	XM_002146277.1	XP_002146313.1	PMAA_068600	100.m009165	serine/threonine-protein kinase ripk4, putative
7023997	XM_002146278.1	XP_002146314.1	PMAA_068610	100.m009166	conserved hypothetical protein
7023998	XM_002146279.1	XP_002146315.1	PMAA_068620	100.m009167	cytochrome P450 monooxygenase, putative
7023999	XM_002146280.1	XP_002146316.1	PMAA_068630	100.m009168	electron transport oxidoreductase, putative
7024000	XM_002146281.1	XP_002146317.1	PMAA_068640	100.m009169	cytochrome b5 reductase, putative
7024001	XM_002146282.1	XP_002146318.1	PMAA_068650	100.m009170	conserved hypothetical protein
7024002	XM_002146283.1	XP_002146319.1	PMAA_068660	100.m009171	conserved hypothetical protein
7024003	XM_002146284.1	XP_002146320.1	PMAA_068670	100.m009172	conserved hypothetical protein
7024004	XM_002146285.1	XP_002146321.1	PMAA_068680	100.m009173	Chromo domain protein Chp1p, putative
7024005	XM_002146286.1	XP_002146322.1	PMAA_068690	100.m009174	ATP-dependent Clp protease, putative
7024006	XM_002146287.1	XP_002146323.1	PMAA_068700	100.m009175	F-box domain protein
7024007	XM_002146288.1	XP_002146324.1	PMAA_068710	100.m009176	60S ribosome biogenesis protein Brx1, putative
7024008	XM_002146289.1	XP_002146325.1	PMAA_068720	100.m009177	conserved hypothetical protein
7024009	XM_002146290.1	XP_002146326.1	PMAA_068730	100.m009178	aspergillopepsin A precursor, putative
7024010	XM_002146291.1	XP_002146327.1	PMAA_068740	100.m009179	hypothetical protein
7024011	XM_002146292.1	XP_002146328.1	PMAA_068750	100.m009180	conserved hypothetical protein
7024012	XM_002146293.1	XP_002146329.1	PMAA_068760	100.m009181	ARS binding protein Abp2, putative
7024013	XM_002146294.1	XP_002146330.1	PMAA_068770	100.m009182	conserved hypothetical protein
7024014	XM_002146295.1	XP_002146331.1	PMAA_068780	100.m009183	conserved hypothetical protein
7024015	XM_002146296.1	XP_002146332.1	PMAA_068790	100.m009184	conserved hypothetical protein
7024016	XM_002146297.1	XP_002146333.1	PMAA_068800	100.m009185	hypothetical protein
7024017	XM_002146298.1	XP_002146334.1	PMAA_068810	100.m009186	conserved hypothetical protein
7024018	XM_002146299.1	XP_002146335.1	PMAA_068820	100.m009187	conserved hypothetical protein
7024019	XM_002146300.1	XP_002146336.1	PMAA_068830	100.m009188	sugar hydrolase, putative
7024020	XM_002146301.1	XP_002146337.1	PMAA_068840	100.m009189	topoisomerase family protein TRF4, putative
7024021	XM_002146302.1	XP_002146338.1	PMAA_068850	100.m009190	DUF636 domain protein
7024022	XM_002146303.1	XP_002146339.1	PMAA_068860	100.m009191	protein kinase C substrate, putative
7024023	XM_002146304.1	XP_002146340.1	PMAA_068870	100.m009192	conserved hypothetical protein
7024024	XM_002146305.1	XP_002146341.1	PMAA_068880	100.m009193	conserved hypothetical protein
7024025	XM_002146306.1	XP_002146342.1	PMAA_068890	100.m009194	3-ketoacyl-CoA thiolase (POT1), putative
7024026	XM_002146307.1	XP_002146343.1	PMAA_068900	100.m009195	conserved hypothetical protein
7024027	XM_002146308.1	XP_002146344.1	PMAA_068910	100.m009196	phospho-2-dehydro-3-deoxyheptonate aldolase
7024028	XM_002146309.1	XP_002146345.1	PMAA_068920	100.m009197	conserved hypothetical protein
7024029	XM_002146310.1	XP_002146346.1	PMAA_068930	100.m009198	conserved hypothetical protein
7024030	XM_002146311.1	XP_002146347.1	PMAA_068940	100.m009199	hexokinase, putative
7024031	XM_002146312.1	XP_002146348.1	PMAA_068950	100.m009200	hypothetical protein
7024032	XM_002146313.1	XP_002146349.1	PMAA_068960	100.m009201	hypothetical protein
7024033	XM_002146314.1	XP_002146350.1	PMAA_068970	100.m009202	peroxisome biosynthesis protein (PAS1/Peroxin-1), putative
7024034	XM_002146315.1	XP_002146351.1	PMAA_068980	100.m009203	DNA replication licensing factor Mcm7, putative
7024035	XM_002146316.1	XP_002146352.1	PMAA_068990	100.m009204	phenylacetyl-CoA ligase, putative
7024036	XM_002146317.1	XP_002146353.1	PMAA_069000	100.m009205	C6 transcription factor, putative
7024037	XM_002146318.1	XP_002146354.1	PMAA_069010	100.m009206	copper amine oxidase
7024038	XM_002146319.1	XP_002146355.1	PMAA_069020	100.m009207	cyclopropane-fatty-acyl-phospholipid synthase, putative
7024039	XM_002146320.1	XP_002146356.1	PMAA_069030	100.m009208	conserved hypothetical protein
7024040	XM_002146321.1	XP_002146357.1	PMAA_069040	100.m009209	tropomyosin, putative
7024041	XM_002146322.1	XP_002146358.1	PMAA_069050	100.m009210	protein required for cell viability Rrp17, putative
7024042	XM_002146323.1	XP_002146359.1	PMAA_069060	100.m009211	conserved hypothetical protein
7024042	XM_002146324.1	XP_002146360.1	PMAA_069060	100.m009211	conserved hypothetical protein
7024043	XM_002146325.1	XP_002146361.1	PMAA_069070	100.m009212	conserved hypothetical protein
7024044	XM_002146326.1	XP_002146362.1	PMAA_069080	100.m009213	protein-ER retention protein (Erd1), putative
7024047	XM_002146327.1	XP_002146363.1	PMAA_069100	100.m009214	peroxisome biosynthesis protein (Peroxin-10), putative
7024045	XM_002146328.1	XP_002146364.1	PMAA_069090	100.m009215	3'-5' exonuclease/helicase (Wrn), putative
7024046	XM_002146329.1	XP_002146365.1	PMAA_069110	100.m009216	small nuclear ribonucleoprotein (LSM5), putative
7024048	XM_002146330.1	XP_002146366.1	PMAA_069120	100.m009217	amino acid permease (Gap1), putative
7024049	XM_002146331.1	XP_002146367.1	PMAA_069130	100.m009218	RhoGAP and Fes/CIP4 domain protein
7024050	XM_002146332.1	XP_002146368.1	PMAA_069140	100.m009219	short chain dehydrogenase (AtsC), putative
7024051	XM_002146333.1	XP_002146369.1	PMAA_069150	100.m009220	conserved hypothetical protein
7024052	XM_002146334.1	XP_002146370.1	PMAA_069160	100.m009221	hypothetical protein
7024053	XM_002146335.1	XP_002146371.1	PMAA_069170	100.m009222	hypothetical protein
7024054	XM_002146336.1	XP_002146372.1	PMAA_069180	100.m009223	alcohol dehydrogenase
7024055	XM_002146337.1	XP_002146373.1	PMAA_069190	100.m009224	mandelate racemase/muconate lactonizing enzyme family protein
7024056	XM_002146338.1	XP_002146374.1	PMAA_069200	100.m009225	C6 transcription factor, putative
7024057	XM_002146339.1	XP_002146375.1	PMAA_069210	100.m009226	Ste20-like serine/threonine protein kinase, putative
7024058	XM_002146340.1	XP_002146376.1	PMAA_069220	100.m009227	UBX domain protein (Ubx5), putative
7024059	XM_002146341.1	XP_002146377.1	PMAA_069230	100.m009228	cell division control protein Cdc6, putative
7024060	XM_002146342.1	XP_002146378.1	PMAA_069240	100.m009229	conserved hypothetical protein
7024061	XM_002146343.1	XP_002146379.1	PMAA_069250	100.m009230	alcohol dehydrogenase, putative
7024062	XM_002146344.1	XP_002146380.1	PMAA_069260	100.m009231	conserved hypothetical protein
7024063	XM_002146345.1	XP_002146381.1	PMAA_069270	100.m009232	conserved hypothetical protein
7024064	XM_002146346.1	XP_002146382.1	PMAA_069280	100.m009233	C2H2 zinc finger protein
7024065	XM_002146347.1	XP_002146383.1	PMAA_069290	100.m009234	conserved hypothetical protein
7024066	XM_002146348.1	XP_002146384.1	PMAA_069300	100.m009235	conserved hypothetical protein
7024067	XM_002146349.1	XP_002146385.1	PMAA_069310	100.m009236	alpha,alpha-trehalose phosphate synthase subunit TPS3, putative
7024068	XM_002146350.1	XP_002146386.1	PMAA_069320	100.m009237	conserved hypothetical protein
7024069	XM_002146351.1	XP_002146387.1	PMAA_069330	100.m009238	thioesterase family protein
7024070	XM_002146352.1	XP_002146388.1	PMAA_069340	100.m009239	conserved hypothetical protein
7024071	XM_002146353.1	XP_002146389.1	PMAA_069350	100.m009240	PCI domain protein
7024072	XM_002146354.1	XP_002146390.1	PMAA_069360	100.m009241	uridylate kinase Ura6
7024073	XM_002146355.1	XP_002146391.1	PMAA_069370	100.m009242	conserved hypothetical protein
7024074	XM_002146356.1	XP_002146392.1	PMAA_069380	100.m009243	condensin complex component cnd2
7024075	XM_002146357.1	XP_002146393.1	PMAA_069390	100.m009244	sodium/calcium exchanger protein
7024076	XM_002146358.1	XP_002146394.1	PMAA_069400	100.m009245	actin cortical patch assembly protein Pan1, putative
7024077	XM_002146359.1	XP_002146395.1	PMAA_069410	100.m009246	DNA-directed RNA polymerase II subunit RPB11a, putative
7024078	XM_002146360.1	XP_002146396.1	PMAA_069420	100.m009247	conserved hypothetical protein
7024079	XM_002146361.1	XP_002146397.1	PMAA_069430	100.m009248	DNA repair protein Rad7, protein
7024080	XM_002146362.1	XP_002146398.1	PMAA_069440	100.m009249	DNA excision repair protein Rad16, putative
7024081	XM_002146363.1	XP_002146399.1	PMAA_069450	100.m009250	C2 domain protein
7024082	XM_002146364.1	XP_002146400.1	PMAA_069460	100.m009251	ARF GTPase activator (Csx2), putative
7024083	XM_002146365.1	XP_002146401.1	PMAA_069470	100.m009252	YT521-B-like splicing factor, putative
7024084	XM_002146366.1	XP_002146402.1	PMAA_069480	100.m009253	hypothetical protein
7024085	XM_002146367.1	XP_002146403.1	PMAA_069490	100.m009254	phosphatidylinositol 4-kinase (STT4), putative
7024086	XM_002146368.1	XP_002146404.1	PMAA_069500	100.m009255	cell-cycle checkpoint protein kinase, putative
7024087	XM_002146369.1	XP_002146405.1	PMAA_069510	100.m009256	14-alpha sterol demethylase Cyp51B
7024088	XM_002146370.1	XP_002146406.1	PMAA_069520	100.m009257	conserved hypothetical protein
7024089	XM_002146371.1	XP_002146407.1	PMAA_069530	100.m009258	serine/threonine protein kinase (Kin28), putative
7024090	XM_002146372.1	XP_002146408.1	PMAA_069540	100.m009259	kinesin family protein (KipA), putative
7024091	XM_002146373.1	XP_002146409.1	PMAA_069550	100.m009260	conserved hypothetical protein
7024092	XM_002146374.1	XP_002146410.1	PMAA_069560	100.m009261	diacylglycerol acyltransferase type 2A
7024093	XM_002146375.1	XP_002146411.1	PMAA_069570	100.m009262	G-patch RNA maturation protein (Gno1), putative
7024094	XM_002146376.1	XP_002146412.1	PMAA_069580	100.m009263	SacI domain and endonuclease/exonuclease/phosphatase family protein
7024810	XM_002146377.1	XP_002146413.1	PMAA_069600	100.m009264	conserved hypothetical protein
7024096	XM_002146378.1	XP_002146414.1	PMAA_069610	100.m009267	pogo transposable element, putative
7024097	XM_002146379.1	XP_002146415.1	PMAA_069620	100.m009268	pogo transposable element, putative
7024098	XM_002146380.1	XP_002146416.1	PMAA_069630	100.m009269	conserved hypothetical protein
7024099	XM_002146381.1	XP_002146417.1	PMAA_069640	100.m009270	pogo transposable element, putative
7024100	XM_002146382.1	XP_002146418.1	PMAA_069650	100.m009271	hypothetical protein
7024101	XM_002146383.1	XP_002146419.1	PMAA_069660	100.m009272	conserved hypothetical protein
7024102	XM_002146384.1	XP_002146420.1	PMAA_069670	100.m009273	AP-3 complex subunit delta, putative
7024103	XM_002146385.1	XP_002146421.1	PMAA_069680	100.m009274	conserved hypothetical protein
7024104	XM_002146386.1	XP_002146422.1	PMAA_069690	100.m009275	conserved hypothetical protein
7024105	XM_002146387.1	XP_002146423.1	PMAA_069700	100.m009276	COP9 subunit 3, putative
7024106	XM_002146388.1	XP_002146424.1	PMAA_069710	100.m009277	gamma-glutamyl phosphate reductase
7024107	XM_002146389.1	XP_002146425.1	PMAA_069720	100.m009278	60S ribosomal protein L18
7024108	XM_002146390.1	XP_002146426.1	PMAA_069730	100.m009279	mitochondrial carrier protein, putative
7024108	XM_002146391.1	XP_002146427.1	PMAA_069730	100.m009279	mitochondrial carrier protein, putative
7024108	XM_002146392.1	XP_002146428.1	PMAA_069730	100.m009279	mitochondrial carrier protein, putative
7024109	XM_002146393.1	XP_002146429.1	PMAA_069740	100.m009280	pre-mRNA splicing factor (Srp1), putative
7024110	XM_002146394.1	XP_002146430.1	PMAA_069750	100.m009281	actin-bundling protein Sac6, putative
7024111	XM_002146395.1	XP_002146431.1	PMAA_069760	100.m009282	DDHD domain protein
7024112	XM_002146396.1	XP_002146432.1	PMAA_069770	100.m009283	RNA polymerase II transcriptional coactivator, putative
7024113	XM_002146397.1	XP_002146433.1	PMAA_069780	100.m009284	5-oxo-L-prolinase, putative
7024114	XM_002146398.1	XP_002146434.1	PMAA_069790	100.m009285	conserved hypothetical protein
7024115	XM_002146399.1	XP_002146435.1	PMAA_069800	100.m009286	conserved hypothetical protein
7024116	XM_002146400.1	XP_002146436.1	PMAA_069810	100.m009287	prolidase pepP, putative
7024117	XM_002146401.1	XP_002146437.1	PMAA_069820	100.m009288	leukotriene A4 hydrolase
7024118	XM_002146402.1	XP_002146438.1	PMAA_069830	100.m009289	conserved hypothetical protein
7024119	XM_002146403.1	XP_002146439.1	PMAA_069840	100.m009290	TOR signalling pathway protein TipA, putative
7024120	XM_002146404.1	XP_002146440.1	PMAA_069850	100.m009291	serine/threonine protein kinase (Ark1), putative
7024121	XM_002146405.1	XP_002146441.1	PMAA_069860	100.m009292	Ku70-binding protein, putative
7024122	XM_002146406.1	XP_002146442.1	PMAA_069870	100.m009293	glutamate 5-kinase, putative
7024123	XM_002146407.1	XP_002146443.1	PMAA_069880	100.m009294	beta-1,6-glucan boisynthesis protein (Knh1), putative
7024123	XM_002146408.1	XP_002146444.1	PMAA_069880	100.m009294	beta-1,6-glucan boisynthesis protein (Knh1), putative
7024123	XM_002146409.1	XP_002146445.1	PMAA_069880	100.m009294	beta-1,6-glucan boisynthesis protein (Knh1), putative
7024124	XM_002146410.1	XP_002146446.1	PMAA_069890	100.m009295	SRP receptor beta subunit (Srp102), putative
7024125	XM_002146411.1	XP_002146447.1	PMAA_069900	100.m009296	cystathionine beta-synthase, putative
7024126	XM_002146412.1	XP_002146448.1	PMAA_069910	100.m009297	conserved hypothetical protein
7024127	XM_002146413.1	XP_002146449.1	PMAA_069920	100.m009298	hypothetical protein
7024128	XM_002146414.1	XP_002146450.1	PMAA_069930	100.m009299	cyclin-dependent protein kinase complex component, putative
7024128	XM_002146415.1	XP_002146451.1	PMAA_069930	100.m009299	cyclin-dependent protein kinase complex component, putative
7024813	XM_002146416.1	XP_002146452.1	PMAA_069950	100.m009300	palmitoyltransferase SidR
7024130	XM_002146417.1	XP_002146453.1	PMAA_069960	100.m009301	L-ornithine N5-oxygenase SidA
7024131	XM_002146418.1	XP_002146454.1	PMAA_069970	100.m009302	nonribosomal siderophore peptide synthase, putative
7024132	XM_002146419.1	XP_002146455.1	PMAA_069980	100.m009303	protein kinase, putative
7024133	XM_002146420.1	XP_002146456.1	PMAA_069990	100.m009304	mRNA splicing factor RNA helicase (Cdc28), putative
7024134	XM_002146421.1	XP_002146457.1	PMAA_070000	100.m009305	cytochrome b5, putative
7024134	XM_002146422.1	XP_002146458.1	PMAA_070000	100.m009305	cytochrome b5, putative
7024134	XM_002146423.1	XP_002146459.1	PMAA_070000	100.m009305	cytochrome b5, putative
7024137	XM_002146424.1	XP_002146460.1	PMAA_070010	100.m009306	high affinity zinc ion transporter, putative
7024135	XM_002146425.1	XP_002146461.1	PMAA_070020	100.m009307	conserved hypothetical protein
7024136	XM_002146426.1	XP_002146462.1	PMAA_070030	100.m009308	nuclear migration protein, putative
7024138	XM_002146427.1	XP_002146463.1	PMAA_070040	100.m009309	hypothetical protein
7024139	XM_002146428.1	XP_002146464.1	PMAA_070050	100.m009310	proline iminopeptidase, putative
7024140	XM_002146429.1	XP_002146465.1	PMAA_070060	100.m009311	clock-controlled protein, putative
7024141	XM_002146430.1	XP_002146466.1	PMAA_070070	100.m009312	AMP-binding enzyme, putative
7024142	XM_002146431.1	XP_002146467.1	PMAA_070080	100.m009313	BolA domain protein
7024143	XM_002146432.1	XP_002146468.1	PMAA_070090	100.m009314	SNARE domain protein
7024144	XM_002146433.1	XP_002146469.1	PMAA_070100	100.m009315	C6 transcription factor, putative
7024145	XM_002146434.1	XP_002146470.1	PMAA_070110	100.m009316	nicotinate phosphoribosyltransferase
7024146	XM_002146435.1	XP_002146471.1	PMAA_070120	100.m009317	PHD finger domain protein, putative
7024147	XM_002146436.1	XP_002146472.1	PMAA_070130	100.m009318	DNA-directed RNA polymerase III subunit Rpc34, putative
7024148	XM_002146437.1	XP_002146473.1	PMAA_070140	100.m009319	heat shock protein (Sti1), putative
7024149	XM_002146438.1	XP_002146474.1	PMAA_070150	100.m009320	acyl-CoA synthetase, putative
7024150	XM_002146439.1	XP_002146475.1	PMAA_070160	100.m009321	conserved hypothetical protein
7024151	XM_002146440.1	XP_002146476.1	PMAA_070170	100.m009322	isochorismatase domain-containing protein 2, mitochondrial precursor, putative
7024152	XM_002146441.1	XP_002146477.1	PMAA_070180	100.m009323	conserved hypothetical protein
7024153	XM_002146442.1	XP_002146478.1	PMAA_070190	100.m009324	Ras small monomeric GTPase RasB
7024154	XM_002146443.1	XP_002146479.1	PMAA_070200	100.m009325	transposable element tc1 transposase, putative
7024155	XM_002146444.1	XP_002146480.1	PMAA_070210	100.m009326	competence/damage-inducible protein CinA, putative
7024156	XM_002146445.1	XP_002146481.1	PMAA_070220	100.m009327	cytosolic hydroxymethyltransferase, putative
7024157	XM_002146446.1	XP_002146482.1	PMAA_070230	100.m009328	MOSC domain protein
7024158	XM_002146447.1	XP_002146483.1	PMAA_070240	100.m009329	tyrosinase, putative
7024159	XM_002146448.1	XP_002146484.1	PMAA_070250	100.m009330	GABA permease, putative
7024160	XM_002146449.1	XP_002146485.1	PMAA_070260	100.m009331	Patatin-like serine hydrolase, putative
7024161	XM_002146450.1	XP_002146486.1	PMAA_070270	100.m009332	DUF803 domain membrane protein
7024162	XM_002146451.1	XP_002146487.1	PMAA_070280	100.m009333	conserved hypothetical protein
7024163	XM_002146452.1	XP_002146488.1	PMAA_070290	100.m009334	APSES transcription factor StuA
7024164	XM_002146453.1	XP_002146489.1	PMAA_070300	100.m009335	ATP dependent RNA helicase, putative
7024165	XM_002146454.1	XP_002146490.1	PMAA_070310	100.m009336	translational activator, putative
7024166	XM_002146455.1	XP_002146491.1	PMAA_070320	100.m009337	hypothetical protein
7024167	XM_002146456.1	XP_002146492.1	PMAA_070330	100.m009338	conserved hypothetical protein
7024168	XM_002146457.1	XP_002146493.1	PMAA_070340	100.m009339	C6 finger domain protein, putative
7024169	XM_002146458.1	XP_002146494.1	PMAA_070350	100.m009340	short chain dehydrogenase/reductase family protein
7024170	XM_002146459.1	XP_002146495.1	PMAA_070360	100.m009341	phospholipid metabolism enzyme regulator, putative
7024171	XM_002146460.1	XP_002146496.1	PMAA_070370	100.m009342	CorA family metal ion transporter, putative
7024172	XM_002146461.1	XP_002146497.1	PMAA_070380	100.m009343	involucrin repeat protein
7024173	XM_002146462.1	XP_002146498.1	PMAA_070390	100.m009344	conserved hypothetical protein
7024174	XM_002146463.1	XP_002146499.1	PMAA_070400	100.m009345	60S ribosomal protein L44
7024175	XM_002146464.1	XP_002146500.1	PMAA_070410	100.m009346	hypothetical protein
7024176	XM_002146465.1	XP_002146501.1	PMAA_070420	100.m009347	conserved hypothetical protein
7024177	XM_002146466.1	XP_002146502.1	PMAA_070430	100.m009348	NEDD8-like protein (RubA), putative
7024177	XM_002146467.1	XP_002146503.1	PMAA_070430	100.m009348	NEDD8-like protein (RubA), putative
7024178	XM_002146468.1	XP_002146504.1	PMAA_070440	100.m009349	RNA polymerase II transcription factor SIII (Elongin) subunit A, putative
7024179	XM_002146469.1	XP_002146505.1	PMAA_070450	100.m009350	O-methylsterigmatocystin oxidoreductase, putative
7024180	XM_002146470.1	XP_002146506.1	PMAA_070460	100.m009351	conserved hypothetical protein
7024181	XM_002146471.1	XP_002146507.1	PMAA_070470	100.m009352	conserved hypothetical protein
7024182	XM_002146472.1	XP_002146508.1	PMAA_070480	100.m009353	tubulin-specific chaperone Rbl2, putative
7024183	XM_002146473.1	XP_002146509.1	PMAA_070490	100.m009354	hypothetical protein
7024184	XM_002146474.1	XP_002146510.1	PMAA_070500	100.m009355	flotillin domain protein
7024185	XM_002146475.1	XP_002146511.1	PMAA_070510	100.m009356	pogo transposable element, putative
7024186	XM_002146476.1	XP_002146512.1	PMAA_070520	100.m009357	cytochrome P450, putative
7024187	XM_002146477.1	XP_002146513.1	PMAA_070530	100.m009358	class V chitinase, putative
7024188	XM_002146478.1	XP_002146514.1	PMAA_070540	100.m009360	F-box domain protein
7024189	XM_002146479.1	XP_002146515.1	PMAA_070550	100.m009361	hypothetical protein
7024190	XM_002146480.1	XP_002146516.1	PMAA_070560	100.m009362	conserved hypothetical protein
7024191	XM_002146481.1	XP_002146517.1	PMAA_070570	100.m009363	conserved hypothetical protein
7024192	XM_002146482.1	XP_002146518.1	PMAA_070580	100.m009364	hypothetical protein
7024193	XM_002146483.1	XP_002146519.1	PMAA_070590	100.m009365	hypothetical protein
7024193	XM_002146484.1	XP_002146520.1	PMAA_070590	100.m009365	hypothetical protein
7024194	XM_002146485.1	XP_002146521.1	PMAA_070600	100.m009366	maltose permease, putative
7024195	XM_002146486.1	XP_002146522.1	PMAA_070610	100.m009367	MAK1-like monooxygenase, putative
7024196	XM_002146487.1	XP_002146523.1	PMAA_070620	100.m009368	short-chain dehydrogenase, putative
7024197	XM_002146488.1	XP_002146524.1	PMAA_070630	100.m009369	MFS transporter, putative
7024198	XM_002146489.1	XP_002146525.1	PMAA_070640	100.m009370	NADP-dependent malic enzyme MaeA
7024199	XM_002146490.1	XP_002146526.1	PMAA_070650	100.m009371	conserved hypothetical protein
7024200	XM_002146491.1	XP_002146527.1	PMAA_070660	100.m009372	DnaJ domain protein, putative
7024201	XM_002146492.1	XP_002146528.1	PMAA_070670	100.m009373	conserved hypothetical protein
7024202	XM_002146493.1	XP_002146529.1	PMAA_070680	100.m009374	U3 small nucleolar ribonucleoprotein subunit (Imp3), putative
7024203	XM_002146494.1	XP_002146530.1	PMAA_070690	100.m009375	MFS allantoate transporter, putative
7024204	XM_002146495.1	XP_002146531.1	PMAA_070700	100.m009376	orotidine 5'-phosphate decarboxylase PyrG
7024205	XM_002146496.1	XP_002146532.1	PMAA_070710	100.m009377	glutathione S-transferase, putative
7024206	XM_002146497.1	XP_002146533.1	PMAA_070720	100.m009378	diacylglycerol O-acyltransferase (DgaT), putative
7024207	XM_002146498.1	XP_002146534.1	PMAA_070730	100.m009379	WD repeat protein
7024208	XM_002146499.1	XP_002146535.1	PMAA_070740	100.m009380	integral membrane protein
7024209	XM_002146500.1	XP_002146536.1	PMAA_070750	100.m009381	peroxisomal membrane protein Pex17, putative
7024210	XM_002146501.1	XP_002146537.1	PMAA_070760	100.m009382	prenyl cysteine carboxyl methyltransferase Ste14
7024211	XM_002146502.1	XP_002146538.1	PMAA_070770	100.m009383	acetyltransferase, CysE/LacA/LpxA/NodL family
7024212	XM_002146503.1	XP_002146539.1	PMAA_070780	100.m009384	ubiquitin hydrolase, putative
7024213	XM_002146504.1	XP_002146540.1	PMAA_070790	100.m009385	transcription factor TFIIE complex alpha subunit, putative
7024214	XM_002146505.1	XP_002146541.1	PMAA_070800	100.m009386	tRNA pseudouridine synthase, putative
7024215	XM_002146506.1	XP_002146542.1	PMAA_070810	100.m009387	GTP binding protein (Bud4), putative
7024216	XM_002146507.1	XP_002146543.1	PMAA_070820	100.m009388	ATP-dependent RNA helicase Mrh4, putative
7024217	XM_002146508.1	XP_002146544.1	PMAA_070830	100.m009390	small subunit of nuclear cap-binding protein complex
7024218	XM_002146509.1	XP_002146545.1	PMAA_070840	100.m009391	conserved hypothetical protein
7024219	XM_002146510.1	XP_002146546.1	PMAA_070850	100.m009392	peptidyl-prolyl cis/trans isomerase
7024220	XM_002146511.1	XP_002146547.1	PMAA_070860	100.m009393	DNA directed RNA polymerase II 15 kDa subunit, putative
7024220	XM_002146512.1	XP_002146548.1	PMAA_070860	100.m009393	DNA directed RNA polymerase II 15 kDa subunit, putative
7024220	XM_002146513.1	XP_002146549.1	PMAA_070860	100.m009393	DNA directed RNA polymerase II 15 kDa subunit, putative
7024221	XM_002146514.1	XP_002146550.1	PMAA_070870	100.m009394	50S ribosomal protein L14
7024222	XM_002146515.1	XP_002146551.1	PMAA_070880	100.m009395	SET domain protein
7024223	XM_002146516.1	XP_002146552.1	PMAA_070890	100.m009396	pyridoxine
7024224	XM_002146517.1	XP_002146553.1	PMAA_070900	100.m009397	4'-phosphopantetheinyl transferase NpgA/CfwA
7024225	XM_002146518.1	XP_002146554.1	PMAA_070910	100.m009398	conserved hypothetical protein
7024226	XM_002146519.1	XP_002146555.1	PMAA_070920	100.m009399	1-acylglycerol-3-phosphate acyltransferase (AtaAp), putative
7024227	XM_002146520.1	XP_002146556.1	PMAA_070930	100.m009400	20S cyclosome subunit (BimA/Nuc2/Cdc27), putative
7024228	XM_002146521.1	XP_002146557.1	PMAA_070940	100.m009401	DUF788 domain protein
7024229	XM_002146522.1	XP_002146558.1	PMAA_070950	100.m009402	conserved hypothetical protein
7024230	XM_002146523.1	XP_002146559.1	PMAA_070960	100.m009403	RING finger membrane protein
7024231	XM_002146524.1	XP_002146560.1	PMAA_070970	100.m009404	HET-s/LopB domain protein
7024232	XM_002146525.1	XP_002146561.1	PMAA_070980	100.m009405	acetyl-CoA carboxylase, putative
7024233	XM_002146526.1	XP_002146562.1	PMAA_070990	100.m009406	GPI anchored protein, putative
7024234	XM_002146527.1	XP_002146563.1	PMAA_071000	100.m009407	hypothetical protein
7024235	XM_002146528.1	XP_002146564.1	PMAA_071010	100.m009408	nuclear distribution protein NudE
7024236	XM_002146529.1	XP_002146565.1	PMAA_071020	100.m009409	multiple ankyrin repeats single kh domain protein, putative
7024237	XM_002146530.1	XP_002146566.1	PMAA_071030	100.m009410	isochorismatase family hydrolase, putative
7024238	XM_002146531.1	XP_002146567.1	PMAA_071040	100.m009411	trafficking protein particle complex subunit 2/Sedlin, putative
7024239	XM_002146532.1	XP_002146568.1	PMAA_071050	100.m009412	conserved hypothetical protein
7024240	XM_002146533.1	XP_002146569.1	PMAA_071060	100.m009413	ZIP metal ion transporter, putative
7024241	XM_002146534.1	XP_002146570.1	PMAA_071070	100.m009414	mitochondrial inner membrane nuclease Nuc1, putative
7024242	XM_002146535.1	XP_002146571.1	PMAA_071080	100.m009415	RING finger domain protein, putative
7024243	XM_002146536.1	XP_002146572.1	PMAA_071090	100.m009416	guanyl-nucleotide exchange factor, putative
7024244	XM_002146537.1	XP_002146573.1	PMAA_071100	100.m009417	zinc carboxypeptidase, putative
7024245	XM_002146538.1	XP_002146574.1	PMAA_071110	100.m009418	BTB/POZ domain protein
7024246	XM_002146539.1	XP_002146575.1	PMAA_071120	100.m009419	conserved hypothetical protein
7024247	XM_002146540.1	XP_002146576.1	PMAA_071130	100.m009420	conserved hypothetical protein
7024248	XM_002146541.1	XP_002146577.1	PMAA_071140	100.m009421	nickel transport protein, putative
7024249	XM_002146542.1	XP_002146578.1	PMAA_071150	100.m009422	terminal deoxynucleotidyl transferase, putative
7024250	XM_002146543.1	XP_002146579.1	PMAA_071160	100.m009423	phospholipid-transporting ATPase, putative
7024251	XM_002146544.1	XP_002146580.1	PMAA_071170	100.m009424	exosome complex endonuclease 2/ribosomal RNA processing protein, putative
7024252	XM_002146545.1	XP_002146581.1	PMAA_071180	100.m009425	cell cycle control protein Cwf15, putative
7024807	XM_002146546.1	XP_002146582.1	PMAA_071200	100.m009426	conserved hypothetical protein
7024254	XM_002146547.1	XP_002146583.1	PMAA_071210	100.m009427	dihydrofolate reductase, putative
7024255	XM_002146548.1	XP_002146584.1	PMAA_071220	100.m009428	voltage-gated chloride channel (ClcA), putative
7024256	XM_002146549.1	XP_002146585.1	PMAA_071230	100.m009429	GDSL Lipase/Acylhydrolase family protein
7024257	XM_002146550.1	XP_002146586.1	PMAA_071240	100.m009430	hypothetical protein
7024258	XM_002146551.1	XP_002146587.1	PMAA_071250	100.m009431	conserved hypothetical protein
7024259	XM_002146552.1	XP_002146588.1	PMAA_071260	100.m009432	isochorismatase family hydrolase, putative
7024260	XM_002146553.1	XP_002146589.1	PMAA_071270	100.m009433	thiamine biosynthetic bifunctional enzyme, putative
7024261	XM_002146554.1	XP_002146590.1	PMAA_071280	100.m009434	eukaryotic translation initiation factor 5, putative
7024262	XM_002146555.1	XP_002146591.1	PMAA_071290	100.m009435	conserved hypothetical protein
7024263	XM_002146556.1	XP_002146592.1	PMAA_071300	100.m009436	DNA ligase Cdc9, putative
7024264	XM_002146557.1	XP_002146593.1	PMAA_071310	100.m009437	mRNA capping enzyme alpha subunit, putative
7024265	XM_002146558.1	XP_002146594.1	PMAA_071320	100.m009438	SAGA complex component (Sgf73), putative
7024265	XM_002146559.1	XP_002146595.1	PMAA_071320	100.m009438	SAGA complex component (Sgf73), putative
7024266	XM_002146560.1	XP_002146596.1	PMAA_071330	100.m009439	beta-ketoacyl synthase (Cem1), putative
7024267	XM_002146561.1	XP_002146597.1	PMAA_071340	100.m009440	agmatinase, putative
7024268	XM_002146562.1	XP_002146598.1	PMAA_071350	100.m009441	Rho GTPase ModA, putative
7024268	XM_002146563.1	XP_002146599.1	PMAA_071350	100.m009441	Rho GTPase ModA, putative
7024268	XM_002146564.1	XP_002146600.1	PMAA_071350	100.m009441	Rho GTPase ModA, putative
7024801	XM_002146565.1	XP_002146601.1	PMAA_071370	100.m009442	siderochrome-iron transporter MirC
7024270	XM_002146566.1	XP_002146602.1	PMAA_071380	100.m009443	conserved hypothetical protein
7024812	XM_002146567.1	XP_002146603.1	PMAA_071410	100.m009444	hypothetical protein
7024272	XM_002146568.1	XP_002146604.1	PMAA_071420	100.m009445	conserved hypothetical protein
7024273	XM_002146569.1	XP_002146605.1	PMAA_071430	100.m009446	conserved hypothetical protein
7024274	XM_002146570.1	XP_002146606.1	PMAA_071440	100.m009447	hypothetical protein
7024275	XM_002146571.1	XP_002146607.1	PMAA_071450	100.m009448	conserved hypothetical protein
7024276	XM_002146572.1	XP_002146608.1	PMAA_071460	100.m009449	conserved hypothetical protein
7024277	XM_002146573.1	XP_002146609.1	PMAA_071470	100.m009450	differentiation regulator (Nrd1), putative
7024278	XM_002146574.1	XP_002146610.1	PMAA_071480	100.m009451	cytoplasmic asparaginyl-tRNA synthetase, putative
7024279	XM_002146575.1	XP_002146611.1	PMAA_071490	100.m009452	conserved hypothetical protein
7024280	XM_002146576.1	XP_002146612.1	PMAA_071500	100.m009453	signal transducer, putative
7024281	XM_002146577.1	XP_002146613.1	PMAA_071510	100.m009454	RNA binding protein Jsn1, putative
7024282	XM_002146578.1	XP_002146614.1	PMAA_071520	100.m009455	inosine triphosphate pyrophosphatase, putative
7024283	XM_002146579.1	XP_002146615.1	PMAA_071530	100.m009456	mRNA decapping hydrolase, putative
7024284	XM_002146580.1	XP_002146616.1	PMAA_071540	100.m009457	ubiquitin hydrolase L3
7024285	XM_002146581.1	XP_002146617.1	PMAA_071550	100.m009458	MT-A70 family
7024286	XM_002146582.1	XP_002146618.1	PMAA_071560	100.m009459	hypothetical protein
7024287	XM_002146583.1	XP_002146619.1	PMAA_071570	100.m009460	exonuclease, putative
7024288	XM_002146584.1	XP_002146620.1	PMAA_071580	100.m009461	conserved hypothetical protein
7024289	XM_002146585.1	XP_002146621.1	PMAA_071590	100.m009462	cell division control protein (Cdc5), putative
7024290	XM_002146586.1	XP_002146622.1	PMAA_071600	100.m009463	histone acetyltransferase (Esa1), putative
7024290	XM_002146587.1	XP_002146623.1	PMAA_071600	100.m009463	histone acetyltransferase (Esa1), putative
7024291	XM_002146588.1	XP_002146624.1	PMAA_071610	100.m009464	conserved hypothetical protein
7024292	XM_002146589.1	XP_002146625.1	PMAA_071620	100.m009465	mitochondrial F1F0 ATP synthase subunit F (Atp17), putative
7024293	XM_002146590.1	XP_002146626.1	PMAA_071630	100.m009466	NADH-ubiquinone oxidoreductase 18 kDa subunit, putative
7024294	XM_002146591.1	XP_002146627.1	PMAA_071640	100.m009467	HEAT repeat protein
7024295	XM_002146592.1	XP_002146628.1	PMAA_071650	100.m009468	DNA-directed RNA polymerase I 13.1 kDa polypeptide, putative
7024296	XM_002146593.1	XP_002146629.1	PMAA_071660	100.m009469	sister chromatid cohesion protein Mis4, putative
7024297	XM_002146594.1	XP_002146630.1	PMAA_071670	100.m009470	NADH-ubiquinone oxidoreductase 64 kDa subunit, putative
7024298	XM_002146595.1	XP_002146631.1	PMAA_071680	100.m009471	conserved hypothetical protein
7024298	XM_002146596.1	XP_002146632.1	PMAA_071680	100.m009471	conserved hypothetical protein
7024298	XM_002146597.1	XP_002146633.1	PMAA_071680	100.m009471	conserved hypothetical protein
7024298	XM_002146598.1	XP_002146634.1	PMAA_071680	100.m009471	conserved hypothetical protein
7024299	XM_002146599.1	XP_002146635.1	PMAA_071690	100.m009472	uridine kinase, putative
7024300	XM_002146600.1	XP_002146636.1	PMAA_071700	100.m009473	pre-rRNA processing protein Esf1, putative
7024301	XM_002146601.1	XP_002146637.1	PMAA_071710	100.m009474	conserved hypothetical protein
7024302	XM_002146602.1	XP_002146638.1	PMAA_071720	100.m009475	Dishevelled, Egl-10, and Pleckstrin domain protein
7024303	XM_002146603.1	XP_002146639.1	PMAA_071730	100.m009476	conserved hypothetical protein
7024304	XM_002146604.1	XP_002146640.1	PMAA_071740	100.m009477	NADH oxidase, putative
7024305	XM_002146605.1	XP_002146641.1	PMAA_071750	100.m009478	short-chain dehydrogenase, putative
7024306	XM_002146606.1	XP_002146642.1	PMAA_071760	100.m009479	cytochrome P450, putative
7024306	XM_002146607.1	XP_002146643.1	PMAA_071760	100.m009479	cytochrome P450, putative
7024307	XM_002146608.1	XP_002146644.1	PMAA_071770	100.m009480	ubiquinone biosynthesis methlytransferase Coq5, putative
7024308	XM_002146609.1	XP_002146645.1	PMAA_071780	100.m009481	sugar isomerase, KpsF/GutQ
7024309	XM_002146610.1	XP_002146646.1	PMAA_071790	100.m009482	pogo transposable element, putative
7024310	XM_002146611.1	XP_002146647.1	PMAA_071800	100.m009483	extracellular glycosyl hydrolase/cellulase, putative
7024311	XM_002146612.1	XP_002146648.1	PMAA_071810	100.m009484	esterase, putative
7024312	XM_002146613.1	XP_002146649.1	PMAA_071820	100.m009485	nicotinamide mononucleotide adenylyl transferase
7024313	XM_002146614.1	XP_002146650.1	PMAA_071830	100.m009486	ubiquitin-protein ligase Ufd4, putative
7024314	XM_002146615.1	XP_002146651.1	PMAA_071840	100.m009487	hypothetical protein
7024315	XM_002146616.1	XP_002146652.1	PMAA_071850	100.m009488	dimethylaniline monooxygenase, putative
7024316	XM_002146617.1	XP_002146653.1	PMAA_071860	100.m009489	sister chromatid separation protein (Src1), putative
7024317	XM_002146618.1	XP_002146654.1	PMAA_071870	100.m009490	adenylate cyclase AcyA
7024318	XM_002146619.1	XP_002146655.1	PMAA_071880	100.m009491	cell wall glucanase, putative
7024319	XM_002146620.1	XP_002146656.1	PMAA_071890	100.m009492	aquaglyceroporin, putative
7024320	XM_002146621.1	XP_002146657.1	PMAA_071900	100.m009493	glycerol kinase, putative
7024321	XM_002146622.1	XP_002146658.1	PMAA_071910	100.m009494	conserved hypothetical protein
7024322	XM_002146623.1	XP_002146659.1	PMAA_071920	100.m009495	cell cycle control protein (Cwf23), putative
7024323	XM_002146624.1	XP_002146660.1	PMAA_071930	100.m009496	hypothetical protein
7024324	XM_002146625.1	XP_002146661.1	PMAA_071940	100.m009497	conserved hypothetical protein
7024325	XM_002146626.1	XP_002146662.1	PMAA_071950	100.m009498	allantoin permease, putative
7024326	XM_002146627.1	XP_002146663.1	PMAA_071960	100.m009499	WD repeat protein
7024327	XM_002146628.1	XP_002146664.1	PMAA_071970	100.m009500	conserved hypothetical protein
7024328	XM_002146629.1	XP_002146665.1	PMAA_071980	100.m009501	ankyrin repeat-cotaining protein, putative
7024799	XM_002146630.1	XP_002146666.1	PMAA_072010	100.m009502	solid-state culture expressed protein (Aos23), putative
7024330	XM_002146631.1	XP_002146667.1	PMAA_072020	100.m009503	GTP binding protein (GTPBP1), putative
7024331	XM_002146632.1	XP_002146668.1	PMAA_072030	100.m009504	U6 small nuclear ribonucleoprotein (Lsm3), putative
7024332	XM_002146633.1	XP_002146669.1	PMAA_072040	100.m009505	conserved hypothetical protein
7024333	XM_002146634.1	XP_002146670.1	PMAA_072050	100.m009506	N-acetylglucosaminyl-phosphatidylinositol deacetylase, putative
7024333	XM_002146635.1	XP_002146671.1	PMAA_072050	100.m009506	N-acetylglucosaminyl-phosphatidylinositol deacetylase, putative
7024800	XM_002146636.1	XP_002146672.1	PMAA_072070	100.m009507	hypothetical protein
7024335	XM_002146637.1	XP_002146673.1	PMAA_072080	100.m009508	conserved hypothetical protein
7024336	XM_002146638.1	XP_002146674.1	PMAA_072090	100.m009509	hypothetical protein
7024337	XM_002146639.1	XP_002146675.1	PMAA_072100	100.m009510	2-amino-3-carboxymuconate-6-semialdehyde decarboxylase, putative
7024338	XM_002146640.1	XP_002146676.1	PMAA_072110	100.m009511	stress response protein Rds1, putative
7024339	XM_002146641.1	XP_002146677.1	PMAA_072120	100.m009512	conserved hypothetical protein
7024340	XM_002146642.1	XP_002146678.1	PMAA_072130	100.m009513	hypothetical protein
7024341	XM_002146643.1	XP_002146679.1	PMAA_072140	100.m009514	GPI-anchored cell surface glycoprotein, putative
7024342	XM_002146644.1	XP_002146680.1	PMAA_072150	100.m009515	pseudouridine synthase
7024343	XM_002146645.1	XP_002146681.1	PMAA_072160	100.m009516	conserved hypothetical protein
7024344	XM_002146646.1	XP_002146682.1	PMAA_072170	100.m009517	rRNA processing protein (Ebp2), putative
7024345	XM_002146647.1	XP_002146683.1	PMAA_072180	100.m009518	conserved hypothetical protein
7024346	XM_002146648.1	XP_002146684.1	PMAA_072190	100.m009519	disulfide isomerase (TigA), putative
7024347	XM_002146649.1	XP_002146685.1	PMAA_072200	100.m009520	posttranscriptional regulation nuclease (Mkt1), putative
7024348	XM_002146650.1	XP_002146686.1	PMAA_072210	100.m009521	oxidoreductase, 2OG-Fe(II) oxygenase family, putative
7024349	XM_002146651.1	XP_002146687.1	PMAA_072220	100.m009522	G protein complex beta subunit SfaD
7024350	XM_002146652.1	XP_002146688.1	PMAA_072230	100.m009523	hypothetical protein
7024351	XM_002146653.1	XP_002146689.1	PMAA_072240	100.m009524	MYND domain protein (SamB), putative
7024352	XM_002146654.1	XP_002146690.1	PMAA_072250	100.m009525	conserved hypothetical protein
7024353	XM_002146655.1	XP_002146691.1	PMAA_072260	100.m009526	phosducin, putative
7024353	XM_002146656.1	XP_002146692.1	PMAA_072260	100.m009526	phosducin, putative
7024354	XM_002146657.1	XP_002146693.1	PMAA_072270	100.m009527	transcription initiation factor subunit (TAF30), putative
7024354	XM_002146658.1	XP_002146694.1	PMAA_072270	100.m009527	transcription initiation factor subunit (TAF30), putative
7024355	XM_002146659.1	XP_002146695.1	PMAA_072280	100.m009528	Ran-specific GTPase-activating protein 1, putative
7024356	XM_002146660.1	XP_002146696.1	PMAA_072290	100.m009529	pogo transposable element, putative
7024357	XM_002146661.1	XP_002146697.1	PMAA_072300	100.m009530	monoxygenase, putative
7024358	XM_002146662.1	XP_002146698.1	PMAA_072310	100.m009531	conserved hypothetical protein
7024359	XM_002146663.1	XP_002146699.1	PMAA_072320	100.m009532	calpain-like protein
7024360	XM_002146664.1	XP_002146700.1	PMAA_072330	100.m009533	xylosidase/arabinosidase, putative
7024361	XM_002146665.1	XP_002146701.1	PMAA_072340	100.m009534	conserved hypothetical protein
7024362	XM_002146666.1	XP_002146702.1	PMAA_072350	100.m009535	hypothetical protein
7024363	XM_002146667.1	XP_002146703.1	PMAA_072360	100.m009536	cation diffusion facilitator family metal ion transporter, putative
7024364	XM_002146668.1	XP_002146704.1	PMAA_072370	100.m009537	conserved hypothetical protein
7024365	XM_002146669.1	XP_002146705.1	PMAA_072380	100.m009538	cell division control protein 2 kinase, putative
7024365	XM_002146670.1	XP_002146706.1	PMAA_072380	100.m009538	cell division control protein 2 kinase, putative
7024366	XM_002146671.1	XP_002146707.1	PMAA_072390	100.m009539	oxidoreductase, 2OG-Fe(II) oxygenase family family
7024367	XM_002146672.1	XP_002146708.1	PMAA_072400	100.m009540	conserved hypothetical protein
7024368	XM_002146673.1	XP_002146709.1	PMAA_072410	100.m009541	acyl-CoA dehydrogenase, putative
7024368	XM_002146674.1	XP_002146710.1	PMAA_072410	100.m009541	acyl-CoA dehydrogenase, putative
7024369	XM_002146675.1	XP_002146711.1	PMAA_072420	100.m009542	conserved hypothetical protein
7024370	XM_002146676.1	XP_002146712.1	PMAA_072430	100.m009543	ABC transporter, putative
7024371	XM_002146677.1	XP_002146713.1	PMAA_072440	100.m009544	hypothetical protein
7024372	XM_002146678.1	XP_002146714.1	PMAA_072450	100.m009545	hypothetical protein
7024373	XM_002146679.1	XP_002146715.1	PMAA_072460	100.m009546	hypothetical protein
7024374	XM_002146680.1	XP_002146716.1	PMAA_072470	100.m009547	RNP domain protein
7024375	XM_002146681.1	XP_002146717.1	PMAA_072480	100.m009548	6-phosphogluconate dehydrogenase Gnd1, putative
7024376	XM_002146682.1	XP_002146718.1	PMAA_072490	100.m009549	conserved hypothetical protein
7024377	XM_002146683.1	XP_002146719.1	PMAA_072500	100.m009550	conserved hypothetical protein
7024378	XM_002146684.1	XP_002146720.1	PMAA_072510	100.m009551	glycosyl hydrolase, putative
7024379	XM_002146685.1	XP_002146721.1	PMAA_072520	100.m009552	nucleotide-sugar transporter, putative
7024380	XM_002146686.1	XP_002146722.1	PMAA_072530	100.m009553	DNA (apurinic or apyrimidinic site) lyase, endon uclease
7024381	XM_002146687.1	XP_002146723.1	PMAA_072540	100.m009554	checkpoint protein kinase (SldA), putative
7024382	XM_002146688.1	XP_002146724.1	PMAA_072550	100.m009555	conserved hypothetical protein
7024383	XM_002146689.1	XP_002146725.1	PMAA_072560	100.m009556	pyroglutamyl peptidase type I, putative
7024384	XM_002146690.1	XP_002146726.1	PMAA_072570	100.m009557	MOSC domain protein
7024385	XM_002146691.1	XP_002146727.1	PMAA_072580	100.m009558	DNA polymerase V, putative
7024386	XM_002146692.1	XP_002146728.1	PMAA_072590	100.m009559	conserved hypothetical protein
7024387	XM_002146693.1	XP_002146729.1	PMAA_072600	100.m009560	conserved hypothetical protein
7024388	XM_002146694.1	XP_002146730.1	PMAA_072610	100.m009561	conserved hypothetical protein
7024389	XM_002146695.1	XP_002146731.1	PMAA_072620	100.m009562	histone H3, putative
7024390	XM_002146696.1	XP_002146732.1	PMAA_072630	100.m009563	hypothetical protein
7024391	XM_002146697.1	XP_002146733.1	PMAA_072640	100.m009564	hypothetical protein
7024392	XM_002146698.1	XP_002146734.1	PMAA_072650	100.m009565	O-methyltransferase, putative
7024393	XM_002146699.1	XP_002146735.1	PMAA_072660	100.m009566	thioesterase domain protein
7024394	XM_002146700.1	XP_002146736.1	PMAA_072670	100.m009567	conserved hypothetical protein
7024395	XM_002146701.1	XP_002146737.1	PMAA_072680	100.m009568	multicopper oxidase, putative
7024396	XM_002146702.1	XP_002146738.1	PMAA_072690	100.m009569	cell cycle control protein tyrosine phosphatase Mih1, putative
7024397	XM_002146703.1	XP_002146739.1	PMAA_072700	100.m009570	GINS DNA replication complex subunit Sld5, putative
7024398	XM_002146704.1	XP_002146740.1	PMAA_072710	100.m009571	SCF ubiquitin ligase subunit CulC, putative
7024399	XM_002146705.1	XP_002146741.1	PMAA_072720	100.m009572	mitochondrial import protein Zim17, putative
7024400	XM_002146706.1	XP_002146742.1	PMAA_072730	100.m009573	HEAT repeat protein (DRIM), putative
7024401	XM_002146707.1	XP_002146743.1	PMAA_072740	100.m009574	CwfJ domain protein
7024402	XM_002146708.1	XP_002146744.1	PMAA_072750	100.m009575	hypothetical protein
7024403	XM_002146709.1	XP_002146745.1	PMAA_072760	100.m009576	conserved hypothetical protein
7024404	XM_002146710.1	XP_002146746.1	PMAA_072770	100.m009577	conserved hypothetical protein
7024405	XM_002146711.1	XP_002146747.1	PMAA_072780	100.m009578	ADP-ribosylation factor family protein
7024406	XM_002146712.1	XP_002146748.1	PMAA_072790	100.m009579	aspergillopepsin-2 precursor, putative
7024407	XM_002146713.1	XP_002146749.1	PMAA_072800	100.m009580	DNA-directed RNA polymerase I subunit beta (Rpa2), putative
7024408	XM_002146714.1	XP_002146750.1	PMAA_072810	100.m009581	proteasome component Pre2, putative
7024409	XM_002146715.1	XP_002146751.1	PMAA_072820	100.m009582	conserved hypothetical protein
7024409	XM_002146716.1	XP_002146752.1	PMAA_072820	100.m009582	conserved hypothetical protein
7024410	XM_002146717.1	XP_002146753.1	PMAA_072830	100.m009583	hypothetical protein
7024411	XM_002146718.1	XP_002146754.1	PMAA_072840	100.m009584	MFS transporter, putative
7024412	XM_002146719.1	XP_002146755.1	PMAA_072850	100.m009585	conserved hypothetical protein
7024413	XM_002146720.1	XP_002146756.1	PMAA_072860	100.m009586	conserved hypothetical protein
7024414	XM_002146721.1	XP_002146757.1	PMAA_072870	100.m009587	conserved hypothetical protein
7024415	XM_002146722.1	XP_002146758.1	PMAA_072880	100.m009588	conserved hypothetical protein
7024416	XM_002146723.1	XP_002146759.1	PMAA_072890	100.m009589	O-methyltransferase
7024417	XM_002146724.1	XP_002146760.1	PMAA_072900	100.m009590	hypothetical protein
7024418	XM_002146725.1	XP_002146761.1	PMAA_072910	100.m009591	retrograde regulation protein 2
7024419	XM_002146726.1	XP_002146762.1	PMAA_072920	100.m009592	thiazole biosynthesis enzyme
7024419	XM_002146727.1	XP_002146763.1	PMAA_072920	100.m009592	thiazole biosynthesis enzyme
7024420	XM_002146728.1	XP_002146764.1	PMAA_072930	100.m009593	sphingomyelinase family protein, putative
7024421	XM_002146729.1	XP_002146765.1	PMAA_072940	100.m009594	WD repeat protein
7024422	XM_002146730.1	XP_002146766.1	PMAA_072950	100.m009595	hypothetical protein
7024423	XM_002146731.1	XP_002146767.1	PMAA_072960	100.m009596	conserved hypothetical protein
7024424	XM_002146732.1	XP_002146768.1	PMAA_072970	100.m009597	conserved hypothetical protein
7024425	XM_002146733.1	XP_002146769.1	PMAA_072980	100.m009598	hypothetical protein
7024426	XM_002146734.1	XP_002146770.1	PMAA_072990	100.m009599	conserved hypothetical protein
7024427	XM_002146735.1	XP_002146771.1	PMAA_073000	100.m009600	ubiquitin-protein ligase E3 component (UBR1), putative
7024428	XM_002146736.1	XP_002146772.1	PMAA_073010	100.m009601	ubiquinol-cytochrome C reductase complex, subunit X, putative
7024429	XM_002146737.1	XP_002146773.1	PMAA_073020	100.m009602	RNA binding protein Pym, putative
7024430	XM_002146738.1	XP_002146774.1	PMAA_073030	100.m009603	protoporphyrinogen oxidase, putative
7024431	XM_002146739.1	XP_002146775.1	PMAA_073040	100.m009604	nuclear polyadenylated RNA-binding protein Nab2, putative
7024432	XM_002146740.1	XP_002146776.1	PMAA_073050	100.m009605	cytochrome P450 alkane hydroxylase, putative
7024433	XM_002146741.1	XP_002146777.1	PMAA_073060	100.m009606	aminomethyl transferase, putative
7024434	XM_002146742.1	XP_002146778.1	PMAA_073070	100.m009607	decapping enzyme Dcp2, putative
7024435	XM_002146743.1	XP_002146779.1	PMAA_073080	100.m009608	conserved hypothetical protein
7024436	XM_002146744.1	XP_002146780.1	PMAA_073090	100.m009609	conserved hypothetical protein
7024437	XM_002146745.1	XP_002146781.1	PMAA_073100	100.m009610	integral membrane protein (Ptm1), putative
7024438	XM_002146746.1	XP_002146782.1	PMAA_073110	100.m009611	conserved hypothetical protein
7024439	XM_002146747.1	XP_002146783.1	PMAA_073120	100.m009612	oxidoreductase family, NAD-binding Rossmann fold protein
7024440	XM_002146748.1	XP_002146784.1	PMAA_073130	100.m009613	hypothetical protein
7024441	XM_002146749.1	XP_002146785.1	PMAA_073140	100.m009614	conserved hypothetical protein
7024442	XM_002146750.1	XP_002146786.1	PMAA_073150	100.m009615	WD repeat protein
7024443	XM_002146751.1	XP_002146787.1	PMAA_073160	100.m009616	mitochondrial oxaloacetate transporter (Oac), putative
7024444	XM_002146752.1	XP_002146788.1	PMAA_073170	100.m009617	ribonucleotide reductase small subunit RnrA, putative
7024445	XM_002146753.1	XP_002146789.1	PMAA_073180	100.m009618	DNA excision repair protein (Rad5), putative
7024446	XM_002146754.1	XP_002146790.1	PMAA_073190	100.m009619	conserved hypothetical protein
7024447	XM_002146755.1	XP_002146791.1	PMAA_073200	100.m009620	CorA family metal ion transporter, putative
7024448	XM_002146756.1	XP_002146792.1	PMAA_073210	100.m009621	DNA polymerase gamma
7024449	XM_002146757.1	XP_002146793.1	PMAA_073220	100.m009622	hypothetical protein
7024450	XM_002146758.1	XP_002146794.1	PMAA_073230	100.m009623	UPF0052 domain protein
7024451	XM_002146759.1	XP_002146795.1	PMAA_073240	100.m009624	conserved hypothetical protein
7024452	XM_002146760.1	XP_002146796.1	PMAA_073250	100.m009625	alpha-N-arabinofuranosidase precursor, putative
7024453	XM_002146761.1	XP_002146797.1	PMAA_073260	100.m009626	acetyl-CoA synthetase, putative
7024454	XM_002146762.1	XP_002146798.1	PMAA_073270	100.m009627	pyridoxamine phosphate oxidase, putative
7024455	XM_002146763.1	XP_002146799.1	PMAA_073280	100.m009628	conserved hypothetical protein
7024456	XM_002146764.1	XP_002146800.1	PMAA_073290	100.m009629	voltage-gated chloride channel, putative
7024457	XM_002146765.1	XP_002146801.1	PMAA_073300	100.m009630	histone-like transcription factor, putative
7024458	XM_002146766.1	XP_002146802.1	PMAA_073310	100.m009631	ubiquinol-cytochrome c reductase iron-sulfur subunit precursor
7024459	XM_002146767.1	XP_002146803.1	PMAA_073320	100.m009632	pentatricopeptide repeat protein
7024460	XM_002146768.1	XP_002146804.1	PMAA_073330	100.m009633	phosphomevalonate kinase
7024461	XM_002146769.1	XP_002146805.1	PMAA_073340	100.m009634	conserved hypothetical protein
7024462	XM_002146770.1	XP_002146806.1	PMAA_073350	100.m009635	20S proteasome maturation protein Ump1, putative
7024463	XM_002146771.1	XP_002146807.1	PMAA_073360	100.m009636	37S ribosomal protein S12
7024464	XM_002146772.1	XP_002146808.1	PMAA_073370	100.m009637	alpha-1,2-mannosyltransferase (Kre2), putative
7024465	XM_002146773.1	XP_002146809.1	PMAA_073380	100.m009638	topisomerase II associated protein (Pat1), putative
7024466	XM_002146774.1	XP_002146810.1	PMAA_073390	100.m009639	UDP-glucose 4-epimerase
7024467	XM_002146775.1	XP_002146811.1	PMAA_073400	100.m009640	oxidoreductase, short chain dehydrogenase/reductase family
7024468	XM_002146776.1	XP_002146812.1	PMAA_073410	100.m009641	mitochondrial ATP-dependent RNA helicase Suv3, putative
7024469	XM_002146777.1	XP_002146813.1	PMAA_073420	100.m009642	Sec1 family superfamily
7024470	XM_002146778.1	XP_002146814.1	PMAA_073430	100.m009643	G-patch domain protein, putative
7024471	XM_002146779.1	XP_002146815.1	PMAA_073440	100.m009644	RNA helicase-like splicing factor (HRH1), putative
7024472	XM_002146780.1	XP_002146816.1	PMAA_073450	100.m009645	ribosome biogenesis protein Urb1, putative
7024473	XM_002146781.1	XP_002146817.1	PMAA_073460	100.m009646	conserved hypothetical protein
7024474	XM_002146782.1	XP_002146818.1	PMAA_073470	100.m009647	C6 transcription factor, putative
7024475	XM_002146783.1	XP_002146819.1	PMAA_073480	100.m009648	glucan endo-1,3-alpha-glucosidase agn1 precursor, putative
7024476	XM_002146784.1	XP_002146820.1	PMAA_073490	100.m009649	C6 transcription factor, putative
7024477	XM_002146785.1	XP_002146821.1	PMAA_073500	100.m009650	lipase/esterase family protein, putative
7024478	XM_002146786.1	XP_002146822.1	PMAA_073510	100.m009651	hypothetical protein
7024479	XM_002146787.1	XP_002146823.1	PMAA_073520	100.m009652	conserved hypothetical protein
7024480	XM_002146788.1	XP_002146824.1	PMAA_073530	100.m009653	pirin domain protein, putative
7024481	XM_002146789.1	XP_002146825.1	PMAA_073540	100.m009654	C6 transcription factor, putative
7024482	XM_002146790.1	XP_002146826.1	PMAA_073550	100.m009655	carboxylesterase, putative
7024483	XM_002146791.1	XP_002146827.1	PMAA_073560	100.m009656	proline oxidase PrnD
7024484	XM_002146792.1	XP_002146828.1	PMAA_073570	100.m009657	hypothetical protein
7024485	XM_002146793.1	XP_002146829.1	PMAA_073580	100.m009658	histidine acid phosphatase, putative
7024486	XM_002146794.1	XP_002146830.1	PMAA_073590	100.m009659	conserved hypothetical protein
7024487	XM_002146795.1	XP_002146831.1	PMAA_073600	100.m009660	C6 transcription factor (PrnA), putative
7024488	XM_002146796.1	XP_002146832.1	PMAA_073610	100.m009661	hypothetical protein
7024489	XM_002146797.1	XP_002146833.1	PMAA_073620	100.m009662	carboxylesterase, putative
7024490	XM_002146798.1	XP_002146834.1	PMAA_073630	100.m009663	sugar transporter, putative
7024491	XM_002146799.1	XP_002146835.1	PMAA_073640	100.m009664	C6 transcription factor, putative
7024492	XM_002146800.1	XP_002146836.1	PMAA_073650	100.m009665	prefoldin subunit 4, putative
7024493	XM_002146801.1	XP_002146837.1	PMAA_073660	100.m009666	autophagy protein Atg27, putative
7024494	XM_002146802.1	XP_002146838.1	PMAA_073670	100.m009667	conserved hypothetical protein
7024495	XM_002146803.1	XP_002146839.1	PMAA_073680	100.m009668	heat shock protein Hsp98/Hsp104/ClpA, putative
7024496	XM_002146804.1	XP_002146840.1	PMAA_073690	100.m009669	polysaccharide deacetylase family protein
7024497	XM_002146805.1	XP_002146841.1	PMAA_073700	100.m009670	chitosanase, putative
7024498	XM_002146806.1	XP_002146842.1	PMAA_073710	100.m009671	conserved hypothetical protein
7024499	XM_002146807.1	XP_002146843.1	PMAA_073720	100.m009672	MFS transporter, putative
7024500	XM_002146808.1	XP_002146844.1	PMAA_073730	100.m009673	glucokinase regulator family protein, putative
7024501	XM_002146809.1	XP_002146845.1	PMAA_073740	100.m009674	conserved hypothetical protein
7024501	XM_002146810.1	XP_002146846.1	PMAA_073740	100.m009674	conserved hypothetical protein
7024502	XM_002146811.1	XP_002146847.1	PMAA_073750	100.m009675	beta-lactamase, putative
7024503	XM_002146812.1	XP_002146848.1	PMAA_073760	100.m009676	hypothetical protein
7024504	XM_002146813.1	XP_002146849.1	PMAA_073770	100.m009677	conserved hypothetical protein
7024505	XM_002146814.1	XP_002146850.1	PMAA_073780	100.m009678	choline transport protein, putative
7024506	XM_002146815.1	XP_002146851.1	PMAA_073790	100.m009679	aldo-keto reductase (AKR13), putative
7024507	XM_002146816.1	XP_002146852.1	PMAA_073800	100.m009680	conserved hypothetical protein
7024508	XM_002146817.1	XP_002146853.1	PMAA_073810	100.m009681	dsDNA-dependent ATPase (Rad54b), putative
7024509	XM_002146818.1	XP_002146854.1	PMAA_073820	100.m009682	conserved hypothetical protein
7024510	XM_002146819.1	XP_002146855.1	PMAA_073830	100.m009683	EBP domain protein, putative
7024511	XM_002146820.1	XP_002146856.1	PMAA_073840	100.m009684	conserved hypothetical protein
7024512	XM_002146821.1	XP_002146857.1	PMAA_073850	100.m009685	conserved hypothetical protein
7024513	XM_002146822.1	XP_002146858.1	PMAA_073860	100.m009686	mtDNA inheritance protein Dml1, putative
7024514	XM_002146823.1	XP_002146859.1	PMAA_073870	100.m009687	Hsp70 family chaperone Lhs1/Orp150, putative
7024515	XM_002146824.1	XP_002146860.1	PMAA_073880	100.m009688	allantoate permease, putative
7024516	XM_002146825.1	XP_002146861.1	PMAA_073890	100.m009689	hypothetical protein
7024517	XM_002146826.1	XP_002146862.1	PMAA_073900	100.m009690	conserved hypothetical protein
7024518	XM_002146827.1	XP_002146863.1	PMAA_073910	100.m009691	short-chain dehydrogenase, putative
7024519	XM_002146828.1	XP_002146864.1	PMAA_073920	100.m009692	conserved hypothetical protein
7024520	XM_002146829.1	XP_002146865.1	PMAA_073930	100.m009693	SDA1 domain protein
7024521	XM_002146830.1	XP_002146866.1	PMAA_073940	100.m009694	40S ribosomal protein S5, putative
7024522	XM_002146831.1	XP_002146867.1	PMAA_073950	100.m009695	AMP binding domain protein, putative
7024523	XM_002146832.1	XP_002146868.1	PMAA_073960	100.m009696	hypothetical protein
7024524	XM_002146833.1	XP_002146869.1	PMAA_073970	100.m009697	2-isopropylmalate synthase
7024524	XM_002146834.1	XP_002146870.1	PMAA_073970	100.m009697	2-isopropylmalate synthase
7024525	XM_002146835.1	XP_002146871.1	PMAA_073980	100.m009698	ATP-dependent RNA helicase (Drs1), putative
7024526	XM_002146836.1	XP_002146872.1	PMAA_073990	100.m009699	C2H2 transcription factor (Sfp1), putative
7024526	XM_002146837.1	XP_002146873.1	PMAA_073990	100.m009699	C2H2 transcription factor (Sfp1), putative
7024527	XM_002146838.1	XP_002146874.1	PMAA_074000	100.m009700	tRNA dihydrouridine synthase, putative
7024528	XM_002146839.1	XP_002146875.1	PMAA_074010	100.m009701	mitochondrial inheritance component mdm12
7024529	XM_002146840.1	XP_002146876.1	PMAA_074020	100.m009702	BAP31 domain protein, putative
7024529	XM_002146841.1	XP_002146877.1	PMAA_074020	100.m009702	BAP31 domain protein, putative
7024530	XM_002146842.1	XP_002146878.1	PMAA_074030	100.m009703	hypothetical protein
7024531	XM_002146843.1	XP_002146879.1	PMAA_074040	100.m009704	hypothetical protein
7024802	XM_002146844.1	XP_002146880.1	PMAA_074060	100.m009705	serine/threonine protein kinase (Kin4), putative
7024533	XM_002146845.1	XP_002146881.1	PMAA_074070	100.m009706	hypothetical protein
7024534	XM_002146846.1	XP_002146882.1	PMAA_074080	100.m009707	conserved hypothetical protein
7024535	XM_002146847.1	XP_002146883.1	PMAA_074090	100.m009708	acyl-CoA dehydrogenase, putative
7024535	XM_002146848.1	XP_002146884.1	PMAA_074090	100.m009708	acyl-CoA dehydrogenase, putative
7024536	XM_002146849.1	XP_002146885.1	PMAA_074100	100.m009709	bZIP transcription factor, putative
7024538	XM_002146850.1	XP_002146886.1	PMAA_074120	100.m009712	GPI anchor biosynthesis protein Gwt1, putative
7024539	XM_002146851.1	XP_002146887.1	PMAA_074130	100.m009713	N-acylethanolamine amidohydrolase, putative
7024540	XM_002146852.1	XP_002146888.1	PMAA_074140	100.m009714	cAMP-specific phosphodiesterase, putative
7024541	XM_002146853.1	XP_002146889.1	PMAA_074150	100.m009715	endosomal SPRY domain protein, putative
7024542	XM_002146854.1	XP_002146890.1	PMAA_074160	100.m009716	hypothetical protein
7024543	XM_002146855.1	XP_002146891.1	PMAA_074170	100.m009717	hypothetical protein
7024544	XM_002146856.1	XP_002146892.1	PMAA_074180	100.m009718	peptidase D, putative
7024545	XM_002146857.1	XP_002146893.1	PMAA_074190	100.m009719	conserved hypothetical protein
7024546	XM_002146858.1	XP_002146894.1	PMAA_074200	100.m009720	protein translocation complex componenet (Npl1), putative
7024547	XM_002146859.1	XP_002146895.1	PMAA_074210	100.m009721	sugar 1,4-lactone oxidase, putative
7024548	XM_002146860.1	XP_002146896.1	PMAA_074220	100.m009722	C6 transcription factor, putative
7024549	XM_002146861.1	XP_002146897.1	PMAA_074230	100.m009723	gelsolin repeat protein, putative
7024550	XM_002146862.1	XP_002146898.1	PMAA_074240	100.m009724	ADP-ribosylation factor family protein
7024551	XM_002146863.1	XP_002146899.1	PMAA_074250	100.m009725	conserved hypothetical protein
7024552	XM_002146864.1	XP_002146900.1	PMAA_074260	100.m009726	C6 transcription factor, putative
7024553	XM_002146865.1	XP_002146901.1	PMAA_074270	100.m009727	transcription factor TFIIA complex subunit Toa1, putative
7024554	XM_002146866.1	XP_002146902.1	PMAA_074280	100.m009728	cell division cycle protein Cdc20, putative
7024555	XM_002146867.1	XP_002146903.1	PMAA_074290	100.m009729	Kelch motif domain protein
7024556	XM_002146868.1	XP_002146904.1	PMAA_074300	100.m009730	beta-glucosidase, putative
7024557	XM_002146869.1	XP_002146905.1	PMAA_074310	100.m009731	DNA repair protein Dds20/Mei5, putative
7024558	XM_002146870.1	XP_002146906.1	PMAA_074320	100.m009732	ubiquitin-protein ligase Sel1/Ubx2, putative
7024559	XM_002146871.1	XP_002146907.1	PMAA_074330	100.m009733	DNA-dependent RNA polymerase II largest subunit, putative
7024560	XM_002146872.1	XP_002146908.1	PMAA_074340	100.m009734	WD repeat protein
7024561	XM_002146873.1	XP_002146909.1	PMAA_074350	100.m009735	regulator of secondary metabolism LaeA
7024562	XM_002146874.1	XP_002146910.1	PMAA_074360	100.m009736	WD repeat protein
7024563	XM_002146875.1	XP_002146911.1	PMAA_074370	100.m009737	conserved hypothetical protein
7024564	XM_002146876.1	XP_002146912.1	PMAA_074380	100.m009738	tRNAHis guanylyltransferase Thg1, putative
7024565	XM_002146877.1	XP_002146913.1	PMAA_074390	100.m009739	Fibronectin type III domain protein
7024566	XM_002146878.1	XP_002146914.1	PMAA_074400	100.m009740	DUF718 domain protein
7024567	XM_002146879.1	XP_002146915.1	PMAA_074410	100.m009741	lipin Smp2, putative
7024568	XM_002146880.1	XP_002146916.1	PMAA_074420	100.m009742	transcription initiation factor TFIID, 31kD subunit, putative
7024569	XM_002146881.1	XP_002146917.1	PMAA_074430	100.m009743	conserved hypothetical protein
7024570	XM_002146882.1	XP_002146918.1	PMAA_074440	100.m009744	U3 small nucleolar RNA-associated protein Utp11, putative
7024571	XM_002146883.1	XP_002146919.1	PMAA_074450	100.m009745	phosphoribosyl-AMP cyclohydrolase, putative
7024572	XM_002146884.1	XP_002146920.1	PMAA_074460	100.m009746	mannosidase MsdS
7024573	XM_002146885.1	XP_002146921.1	PMAA_074470	100.m009747	nucleoside-diphosphate-sugar epimerase family protein
7024574	XM_002146886.1	XP_002146922.1	PMAA_074480	100.m009748	C6 transcription factor, putative
7024575	XM_002146887.1	XP_002146923.1	PMAA_074490	100.m009749	conserved hypothetical protein
7024575	XM_002146888.1	XP_002146924.1	PMAA_074490	100.m009749	conserved hypothetical protein
7024576	XM_002146889.1	XP_002146925.1	PMAA_074500	100.m009750	DNA replication initiation factor Cdc45
7024577	XM_002146890.1	XP_002146926.1	PMAA_074510	100.m009751	GPI anchor transamidase, putative
7024578	XM_002146891.1	XP_002146927.1	PMAA_074520	100.m009752	multidrug resistance protein fnx1, putative
7024579	XM_002146892.1	XP_002146928.1	PMAA_074530	100.m009753	monooxygenase, putative
7024580	XM_002146893.1	XP_002146929.1	PMAA_074540	100.m009754	homeobox and C2H2 transcription factor, putative
7024581	XM_002146894.1	XP_002146930.1	PMAA_074550	100.m009755	aldehyde dehydrogenase, putative
7024582	XM_002146895.1	XP_002146931.1	PMAA_074560	100.m009756	hypothetical protein
7024583	XM_002146896.1	XP_002146932.1	PMAA_074570	100.m009757	ubiquitin-conjugating enzyme, putative
7024584	XM_002146897.1	XP_002146933.1	PMAA_074580	100.m009758	hypothetical protein
7024585	XM_002146898.1	XP_002146934.1	PMAA_074590	100.m009759	CUE domain protein, putative
7024586	XM_002146899.1	XP_002146935.1	PMAA_074600	100.m009760	peroxisome biosynthesis protein (Peroxine-7), putative
7024587	XM_002146900.1	XP_002146936.1	PMAA_074610	100.m009761	DUF1014 domain protein
7024588	XM_002146901.1	XP_002146937.1	PMAA_074620	100.m009762	JmjC domain protein, putative
7024589	XM_002146902.1	XP_002146938.1	PMAA_074630	100.m009763	GTP-binding protein Obg
7024590	XM_002146903.1	XP_002146939.1	PMAA_074640	100.m009764	MFS multidrug transporter, putative
7024591	XM_002146904.1	XP_002146940.1	PMAA_074650	100.m009765	C6 transcription factor (UaY), putative
7024592	XM_002146905.1	XP_002146941.1	PMAA_074660	100.m009766	DnaJ domain protein
7024593	XM_002146906.1	XP_002146942.1	PMAA_074670	100.m009767	adenylosuccinate synthetase AdB
7024814	XM_002146907.1	XP_002146943.1	PMAA_074690	100.m009768	conserved hypothetical protein
7024595	XM_002146908.1	XP_002146944.1	PMAA_074700	100.m009769	conserved hypothetical protein
7024596	XM_002146909.1	XP_002146945.1	PMAA_074710	100.m009770	conserved hypothetical protein
7024597	XM_002146910.1	XP_002146946.1	PMAA_074720	100.m009771	aldehyde dehydrogenase family protein
7024598	XM_002146911.1	XP_002146947.1	PMAA_074730	100.m009772	integral membrane protein
7024599	XM_002146912.1	XP_002146948.1	PMAA_074740	100.m009773	polyamine transporter, putative
7024600	XM_002146913.1	XP_002146949.1	PMAA_074750	100.m009774	DEAD box RNA helicase HelA, putative
7024601	XM_002146914.1	XP_002146950.1	PMAA_074760	100.m009775	conserved hypothetical protein
7024602	XM_002146915.1	XP_002146951.1	PMAA_074770	100.m009776	conserved hypothetical protein
7024603	XM_002146916.1	XP_002146952.1	PMAA_074780	100.m009777	conserved hypothetical protein
7024604	XM_002146917.1	XP_002146953.1	PMAA_074790	100.m009778	conserved hypothetical protein
7024605	XM_002146918.1	XP_002146954.1	PMAA_074800	100.m009779	conserved hypothetical protein
7024606	XM_002146919.1	XP_002146955.1	PMAA_074810	100.m009780	conserved hypothetical protein
7024606	XM_002146920.1	XP_002146956.1	PMAA_074810	100.m009780	conserved hypothetical protein
7024606	XM_002146921.1	XP_002146957.1	PMAA_074810	100.m009780	conserved hypothetical protein
7024606	XM_002146922.1	XP_002146958.1	PMAA_074810	100.m009780	conserved hypothetical protein
7024607	XM_002146923.1	XP_002146959.1	PMAA_074820	100.m009781	beta-galactosidase, putative
7024608	XM_002146924.1	XP_002146960.1	PMAA_074830	100.m009782	beta-galactosidase, putative
7024609	XM_002146925.1	XP_002146961.1	PMAA_074840	100.m009783	conserved hypothetical protein
7024610	XM_002146926.1	XP_002146962.1	PMAA_074850	100.m009784	nuclear segregation protein (Bfr1), putative
7024611	XM_002146927.1	XP_002146963.1	PMAA_074860	100.m009785	RNA polymerase subunit
7024611	XM_002146928.1	XP_002146964.1	PMAA_074860	100.m009785	RNA polymerase subunit
7024612	XM_002146929.1	XP_002146965.1	PMAA_074870	100.m009786	integral membrane protein Pth11-like, putative
7024613	XM_002146930.1	XP_002146966.1	PMAA_074880	100.m009787	methyltransferase (Ncl1), putative
7024614	XM_002146931.1	XP_002146967.1	PMAA_074890	100.m009788	hypothetical protein
7024615	XM_002146932.1	XP_002146968.1	PMAA_074900	100.m009789	AMP-binding enzyme, putative
7024616	XM_002146933.1	XP_002146969.1	PMAA_074910	100.m009790	conserved hypothetical protein
7024617	XM_002146934.1	XP_002146970.1	PMAA_074920	100.m009791	histidinol-phosphate aminotransferase
7024618	XM_002146935.1	XP_002146971.1	PMAA_074930	100.m009792	conserved hypothetical protein
7024619	XM_002146936.1	XP_002146972.1	PMAA_074940	100.m009793	chromosome segregation protein BIR1, putative
7024620	XM_002146937.1	XP_002146973.1	PMAA_074950	100.m009794	C2H2 finger domain protein, putative
7024622	XM_002146939.1	XP_002146975.1	PMAA_074970	100.m009795	amidohydrolase family protein
7024623	XM_002146940.1	XP_002146976.1	PMAA_074980	100.m009796	hypothetical protein
7024624	XM_002146941.1	XP_002146977.1	PMAA_074990	100.m009797	blue light-inducible protein Bli-3
7024625	XM_002146942.1	XP_002146978.1	PMAA_075000	100.m009798	SAGA-like transcriptional regulatory complex subunit Spt3, putative
7024626	XM_002146943.1	XP_002146979.1	PMAA_075010	100.m009799	diphthine synthase, putative
7024627	XM_002146944.1	XP_002146980.1	PMAA_075020	100.m009800	AP-2 adaptor complex subunit sigma, putative
7024628	XM_002146945.1	XP_002146981.1	PMAA_075030	100.m009801	conserved hypothetical protein
7024629	XM_002146946.1	XP_002146982.1	PMAA_075040	100.m009802	DUF292 domian protein
7024630	XM_002146947.1	XP_002146983.1	PMAA_075050	100.m009803	glutamine dependent NAD+ synthetase, putative
7024631	XM_002146948.1	XP_002146984.1	PMAA_075060	100.m009804	DUF1338 domain protein
7024632	XM_002146949.1	XP_002146985.1	PMAA_075070	100.m009805	hypothetical protein
7024633	XM_002146950.1	XP_002146986.1	PMAA_075080	100.m009806	SUN domain protein (Adg3), putative
7024634	XM_002146951.1	XP_002146987.1	PMAA_075090	100.m009807	hypothetical protein
7024635	XM_002146952.1	XP_002146988.1	PMAA_075100	100.m009808	conserved hypothetical protein
7024636	XM_002146953.1	XP_002146989.1	PMAA_075110	100.m009809	phosphoesterase superfamily protein
7024637	XM_002146954.1	XP_002146990.1	PMAA_075120	100.m009810	conserved hypothetical protein
7024638	XM_002146955.1	XP_002146991.1	PMAA_075130	100.m009811	MIND kinetochore complex component Mtw1, putative
7024639	XM_002146956.1	XP_002146992.1	PMAA_075140	100.m009812	conserved hypothetical protein
7024640	XM_002146957.1	XP_002146993.1	PMAA_075150	100.m009813	conserved hypothetical protein
7024641	XM_002146958.1	XP_002146994.1	PMAA_075160	100.m009814	conserved hypothetical protein
7024642	XM_002146959.1	XP_002146995.1	PMAA_075170	100.m009815	MFS polyamine transporter, putative
7024643	XM_002146960.1	XP_002146996.1	PMAA_075180	100.m009816	conserved hypothetical protein
7024644	XM_002146961.1	XP_002146997.1	PMAA_075190	100.m009817	conserved hypothetical protein
7024645	XM_002146962.1	XP_002146998.1	PMAA_075200	100.m009818	nonribosomal peptide synthase, putative
7024646	XM_002146963.1	XP_002146999.1	PMAA_075210	100.m009819	leucoanthocyanidin dioxygenase, putative
7024647	XM_002146964.1	XP_002147000.1	PMAA_075220	100.m009820	conserved hypothetical protein
7024648	XM_002146965.1	XP_002147001.1	PMAA_075230	100.m009821	DUF1275 domain protein
7024649	XM_002146966.1	XP_002147002.1	PMAA_075240	100.m009822	fatty acid elongase (Gig30), putative
7024650	XM_002146967.1	XP_002147003.1	PMAA_075250	100.m009823	conserved hypothetical protein
7024651	XM_002146968.1	XP_002147004.1	PMAA_075260	100.m009824	eukaryotic translation initiation factor subunit eIF2B-gamma, putative
7024652	XM_002146969.1	XP_002147005.1	PMAA_075270	100.m009825	Swr1p complex component (Swc5), putative
7024653	XM_002146970.1	XP_002147006.1	PMAA_075280	100.m009826	ribonuclease T2, putative
7024654	XM_002146971.1	XP_002147007.1	PMAA_075290	100.m009827	MFS multidrug transporter, putative
7024655	XM_002146972.1	XP_002147008.1	PMAA_075300	100.m009828	C2H2 type conidiation transcription factor BrlA
7024656	XM_002146973.1	XP_002147009.1	PMAA_075310	100.m009829	conserved hypothetical protein
7024657	XM_002146974.1	XP_002147010.1	PMAA_075320	100.m009830	conserved hypothetical protein
7024658	XM_002146975.1	XP_002147011.1	PMAA_075330	100.m009831	conserved hypothetical protein
7024659	XM_002146976.1	XP_002147012.1	PMAA_075340	100.m009832	conserved hypothetical protein
7024660	XM_002146977.1	XP_002147013.1	PMAA_075350	100.m009833	hypothetical protein
7024661	XM_002146978.1	XP_002147014.1	PMAA_075360	100.m009834	pseudouridine synthase TruD/Pus7, putative
7024662	XM_002146979.1	XP_002147015.1	PMAA_075370	100.m009835	hypothetical protein
7024663	XM_002146980.1	XP_002147016.1	PMAA_075380	100.m009836	PHD finger domain protein
7024664	XM_002146981.1	XP_002147017.1	PMAA_075390	100.m009837	conserved hypothetical protein
7024665	XM_002146982.1	XP_002147018.1	PMAA_075400	100.m009838	sphinganine hydroxylase Sur2, putative
7024666	XM_002146983.1	XP_002147019.1	PMAA_075410	100.m009839	TCTP family protein
7024667	XM_002146984.1	XP_002147020.1	PMAA_075420	100.m009840	C6 transcription factor, putative
7024668	XM_002146985.1	XP_002147021.1	PMAA_075430	100.m009841	signal recognition particle 19 kDa protein, putative
7024669	XM_002146986.1	XP_002147022.1	PMAA_075440	100.m009842	aminotransferase, class III
7024670	XM_002146987.1	XP_002147023.1	PMAA_075450	100.m009843	ATP-dependent bile acid permease, putative
7024671	XM_002146988.1	XP_002147024.1	PMAA_075460	100.m009844	hypothetical protein
7024672	XM_002146989.1	XP_002147025.1	PMAA_075470	100.m009845	nonribosomal peptide synthase, putative
7024673	XM_002146990.1	XP_002147026.1	PMAA_075480	100.m009847	conserved hypothetical protein
7024674	XM_002146991.1	XP_002147027.1	PMAA_075490	100.m009848	hypothetical protein
7024675	XM_002146992.1	XP_002147028.1	PMAA_075500	100.m009849	conserved hypothetical protein
7024676	XM_002146993.1	XP_002147029.1	PMAA_075510	100.m009850	hypothetical protein
7024677	XM_002146994.1	XP_002147030.1	PMAA_075520	100.m009851	sucrose transport protein, putative
7024678	XM_002146995.1	XP_002147031.1	PMAA_075530	100.m009852	conserved hypothetical protein
7024679	XM_002146996.1	XP_002147032.1	PMAA_075540	100.m009853	phenylalanine ammonia-lyase
7024680	XM_002146997.1	XP_002147033.1	PMAA_075550	100.m009854	cleavage and polyadenylation specifity factor, 73 kDa subunit, putative
7024681	XM_002146998.1	XP_002147034.1	PMAA_075560	100.m009855	conserved hypothetical protein
7024682	XM_002146999.1	XP_002147035.1	PMAA_075570	100.m009856	protein kinase (Lkh1), putative
7024682	XM_002147000.1	XP_002147036.1	PMAA_075570	100.m009856	protein kinase (Lkh1), putative
7024683	XM_002147001.1	XP_002147037.1	PMAA_075580	100.m009857	mitochondrial cation transporter, putative
7024684	XM_002147002.1	XP_002147038.1	PMAA_075590	100.m009858	alpha-acetolactate decarboxylase precursor, putative
7024685	XM_002147003.1	XP_002147039.1	PMAA_075600	100.m009859	acetolactate synthase, putative
7024686	XM_002147004.1	XP_002147040.1	PMAA_075610	100.m009860	conserved hypothetical protein
7024687	XM_002147005.1	XP_002147041.1	PMAA_075620	100.m009861	NOL1/NOP2/sun domain protein, putative
7024688	XM_002147006.1	XP_002147042.1	PMAA_075630	100.m009862	conserved hypothetical protein
7024689	XM_002147007.1	XP_002147043.1	PMAA_075640	100.m009863	leucoanthocyanidin dioxygenase, putative
7024690	XM_002147008.1	XP_002147044.1	PMAA_075650	100.m009864	hypothetical protein
7024691	XM_002147009.1	XP_002147045.1	PMAA_075660	100.m009865	oxidoreductase, short chain dehydrogenase/reductase family, putative
7024692	XM_002147010.1	XP_002147046.1	PMAA_075670	100.m009866	phosphate transporter
7024693	XM_002147011.1	XP_002147047.1	PMAA_075680	100.m009867	conserved hypothetical protein
7024694	XM_002147012.1	XP_002147048.1	PMAA_075690	100.m009868	RTA1 domain protein, putative
7024695	XM_002147013.1	XP_002147049.1	PMAA_075700	100.m009869	conserved hypothetical protein
7024696	XM_002147014.1	XP_002147050.1	PMAA_075710	100.m009870	FYVE domain protein, putative
7024697	XM_002147015.1	XP_002147051.1	PMAA_075720	100.m009871	acetyltransferase, GNAT family, putative
7024698	XM_002147016.1	XP_002147052.1	PMAA_075730	100.m009872	conserved hypothetical protein
7024699	XM_002147017.1	XP_002147053.1	PMAA_075740	100.m009873	long chain fatty alcohol oxidase, putative
7024700	XM_002147018.1	XP_002147054.1	PMAA_075750	100.m009874	AMP-binding enzyme, putative
7024701	XM_002147019.1	XP_002147055.1	PMAA_075760	100.m009875	DEAD/DEAH box helicase, putative
7024702	XM_002147020.1	XP_002147056.1	PMAA_075770	100.m009876	phosphatidylinositol:UDP-GlcNAc transferase subunit PIG-A
7024703	XM_002147021.1	XP_002147057.1	PMAA_075780	100.m009877	conserved hypothetical protein
7024704	XM_002147022.1	XP_002147058.1	PMAA_075790	100.m009878	ADP-ribosylation factor family protein
7024705	XM_002147023.1	XP_002147059.1	PMAA_075800	100.m009879	conserved hypothetical protein
7024706	XM_002147024.1	XP_002147060.1	PMAA_075810	100.m009880	maltose permease, putative
7024707	XM_002147025.1	XP_002147061.1	PMAA_075820	100.m009881	alpha-xylosidase, putative
7024708	XM_002147026.1	XP_002147062.1	PMAA_075830	100.m009882	conserved hypothetical protein
7024709	XM_002147027.1	XP_002147063.1	PMAA_075840	100.m009883	glucan endo-1,3-alpha-glucosidase agn1 precursor, putative
7024710	XM_002147028.1	XP_002147064.1	PMAA_075850	100.m009884	mRNA splicing factor (Prp18), putative
7024711	XM_002147029.1	XP_002147065.1	PMAA_075860	100.m009885	Sin3-associated polypeptide Sap18, putative
7024712	XM_002147030.1	XP_002147066.1	PMAA_075870	100.m009886	glutathione S-transferase, putative
7024713	XM_002147031.1	XP_002147067.1	PMAA_075880	100.m009887	conserved hypothetical protein
7024714	XM_002147032.1	XP_002147068.1	PMAA_075890	100.m009888	hexose carrier protein, putative
7024715	XM_002147033.1	XP_002147069.1	PMAA_075900	100.m009889	oxidoreductase, putative
7024716	XM_002147034.1	XP_002147070.1	PMAA_075910	100.m009890	conserved hypothetical protein
7024717	XM_002147035.1	XP_002147071.1	PMAA_075920	100.m009891	arylsulfatase, putative
7024718	XM_002147036.1	XP_002147072.1	PMAA_075930	100.m009892	hypothetical protein
7024719	XM_002147037.1	XP_002147073.1	PMAA_075940	100.m009893	universal stress protein family domain protein
7024720	XM_002147038.1	XP_002147074.1	PMAA_075950	100.m009894	V-type ATPase, B subunit, putative
7024720	XM_002147039.1	XP_002147075.1	PMAA_075950	100.m009894	V-type ATPase, B subunit, putative
7024721	XM_002147040.1	XP_002147076.1	PMAA_075960	100.m009895	wd40 protein, putative
7024722	XM_002147041.1	XP_002147077.1	PMAA_075970	100.m009896	bifunctional tryptophan synthase TRPB
7024723	XM_002147042.1	XP_002147078.1	PMAA_075980	100.m009897	transcriptional regulator Medusa
7024724	XM_002147043.1	XP_002147079.1	PMAA_075990	100.m009898	alcohol dehydrogenase, putative
7024725	XM_002147044.1	XP_002147080.1	PMAA_076000	100.m009899	conserved hypothetical protein
7024726	XM_002147045.1	XP_002147081.1	PMAA_076010	100.m009900	conserved hypothetical protein
7024727	XM_002147046.1	XP_002147082.1	PMAA_076020	100.m009901	conserved hypothetical protein
7024728	XM_002147047.1	XP_002147083.1	PMAA_076030	100.m009902	N-alkane-inducible cytochrome P450, putative
7024729	XM_002147048.1	XP_002147084.1	PMAA_076040	100.m009903	conserved hypothetical protein
7024730	XM_002147049.1	XP_002147085.1	PMAA_076050	100.m009904	conserved hypothetical protein
7024731	XM_002147050.1	XP_002147086.1	PMAA_076060	100.m009905	GABA permease, putative
7024732	XM_002147051.1	XP_002147087.1	PMAA_076070	100.m009906	DnaJ domain protein
7024733	XM_002147052.1	XP_002147088.1	PMAA_076080	100.m009907	Amid-like NADH oxidoreductase, putative
7024734	XM_002147053.1	XP_002147089.1	PMAA_076090	100.m009908	DRAP deaminase, putative
7024735	XM_002147054.1	XP_002147090.1	PMAA_076100	100.m009909	OB-fold nucleic acid binding domain
7024736	XM_002147055.1	XP_002147091.1	PMAA_076110	100.m009910	conserved hypothetical protein
7024737	XM_002147056.1	XP_002147092.1	PMAA_076120	100.m009911	conserved hypothetical protein
7024738	XM_002147057.1	XP_002147093.1	PMAA_076130	100.m009912	meiosis induction protein kinase (Ime2), putative
7024739	XM_002147058.1	XP_002147094.1	PMAA_076140	100.m009913	3' exoribonuclease family protein (Rrp42), putative
7024740	XM_002147059.1	XP_002147095.1	PMAA_076150	100.m009914	conserved hypothetical protein
7024741	XM_002147060.1	XP_002147096.1	PMAA_076160	100.m009915	cytochrome c
7024741	XM_002147061.1	XP_002147097.1	PMAA_076160	100.m009915	cytochrome c
7024742	XM_002147062.1	XP_002147098.1	PMAA_076170	100.m009916	conserved hypothetical protein
7024743	XM_002147063.1	XP_002147099.1	PMAA_076180	100.m009917	RNA polymerase II subunit 3
7024743	XM_002147064.1	XP_002147100.1	PMAA_076180	100.m009917	RNA polymerase II subunit 3
7024744	XM_002147065.1	XP_002147101.1	PMAA_076190	100.m009918	C6 transcription factor, putative
7024745	XM_002147066.1	XP_002147102.1	PMAA_076200	100.m009919	glutathione S-transferase, putative
7024746	XM_002147067.1	XP_002147103.1	PMAA_076210	100.m009920	conserved hypothetical protein
7024747	XM_002147068.1	XP_002147104.1	PMAA_076220	100.m009921	Nudix/MutT family protein
7024748	XM_002147069.1	XP_002147105.1	PMAA_076230	100.m009922	arginine-tRNA-protein transferase 1
7024749	XM_002147070.1	XP_002147106.1	PMAA_076240	100.m009923	calcineurin binding protein, putative
7024750	XM_002147071.1	XP_002147107.1	PMAA_076250	100.m009924	AMP dependent CoA ligase, putative
7024751	XM_002147072.1	XP_002147108.1	PMAA_076260	100.m009925	integral membrane protein
7024752	XM_002147073.1	XP_002147109.1	PMAA_076270	100.m009926	conserved hypothetical protein
7024753	XM_002147074.1	XP_002147110.1	PMAA_076280	100.m009927	mitochondrial co-chaperone GrpE, putative
7024754	XM_002147075.1	XP_002147111.1	PMAA_076290	100.m009928	phenylalanyl-tRNA synthetase alpha subunit (PodG), putative
7024755	XM_002147076.1	XP_002147112.1	PMAA_076300	100.m009929	mitochondrial dicarboxylate carrier, putative
7024756	XM_002147077.1	XP_002147113.1	PMAA_076310	100.m009930	conserved hypothetical protein
7024756	XM_002147078.1	XP_002147114.1	PMAA_076310	100.m009930	conserved hypothetical protein
7024757	XM_002147079.1	XP_002147115.1	PMAA_076320	100.m009931	conserved hypothetical protein
7024758	XM_002147080.1	XP_002147116.1	PMAA_076330	100.m009932	cytochrome c oxidase polypeptide vib
7024759	XM_002147081.1	XP_002147117.1	PMAA_076340	100.m009933	conserved hypothetical protein
7024759	XM_002147082.1	XP_002147118.1	PMAA_076340	100.m009933	conserved hypothetical protein
7024760	XM_002147083.1	XP_002147119.1	PMAA_076350	100.m009934	peptidyl prolyl cis-trans isomerase Cyclophilin, putative
7024760	XM_002147084.1	XP_002147120.1	PMAA_076350	100.m009934	peptidyl prolyl cis-trans isomerase Cyclophilin, putative
7024761	XM_002147085.1	XP_002147121.1	PMAA_076360	100.m009935	protein transport protein (SEC31), putative
7024762	XM_002147086.1	XP_002147122.1	PMAA_076370	100.m009936	peroxisomal membrane anchor protein, putative
7024763	XM_002147087.1	XP_002147123.1	PMAA_076380	100.m009937	PAPA-1-like conserved region protein
7024764	XM_002147088.1	XP_002147124.1	PMAA_076390	100.m009938	amidohydrolase family protein
7024765	XM_002147089.1	XP_002147125.1	PMAA_076400	100.m009939	C6 transcription factor, putative
7024765	XM_002147090.1	XP_002147126.1	PMAA_076400	100.m009939	C6 transcription factor, putative
7024766	XM_002147091.1	XP_002147127.1	PMAA_076410	100.m009940	salicylate hydroxylase, putative
7024767	XM_002147092.1	XP_002147128.1	PMAA_076420	100.m009941	conserved hypothetical protein
7024768	XM_002147093.1	XP_002147129.1	PMAA_076430	100.m009942	fatty acid oxygenase PpoC, putative
7024769	XM_002147094.1	XP_002147130.1	PMAA_076440	100.m009943	conserved hypothetical protein
7024770	XM_002147095.1	XP_002147131.1	PMAA_076450	100.m009944	conserved hypothetical protein
7024771	XM_002147096.1	XP_002147132.1	PMAA_076460	100.m009945	3-ketosteroid-delta-1-dehydrogenase, putative
7024772	XM_002147097.1	XP_002147133.1	PMAA_076470	100.m009946	flavin containing amine oxidase, putative
7024773	XM_002147098.1	XP_002147134.1	PMAA_076480	100.m009947	envelope glycoprotein GP340/GP220, putative
7024774	XM_002147099.1	XP_002147135.1	PMAA_076490	100.m009948	homeobox transcription factor, putative
7024775	XM_002147100.1	XP_002147136.1	PMAA_076500	100.m009949	isoflavone reductase family protein
7024776	XM_002147101.1	XP_002147137.1	PMAA_076510	100.m009950	hypothetical protein
7024777	XM_002147102.1	XP_002147138.1	PMAA_076520	100.m009951	C6 transcription factor, putative
7024778	XM_002147103.1	XP_002147139.1	PMAA_076530	100.m009952	Acidic mammalian chitinase precursor, putative
7024780	XM_002147105.1	XP_002147141.1	PMAA_076550	100.m009954	conserved hypothetical protein
7024781	XM_002147106.1	XP_002147142.1	PMAA_076560	100.m009955	hypothetical protein
7024782	XM_002147107.1	XP_002147143.1	PMAA_076570	100.m009956	monooxygenase, putative
7024783	XM_002147108.1	XP_002147144.1	PMAA_076580	100.m009957	extracellular lipase, putative
7024784	XM_002147109.1	XP_002147145.1	PMAA_076590	100.m009958	conserved hypothetical protein
7024785	XM_002147110.1	XP_002147146.1	PMAA_076600	100.m009959	cytochrome P450 oxidoreductase, putative
7024786	XM_002147111.1	XP_002147147.1	PMAA_076610	100.m009960	conserved hypothetical protein
7024787	XM_002147112.1	XP_002147148.1	PMAA_076620	100.m009961	conserved hypothetical protein
7024788	XM_002147113.1	XP_002147149.1	PMAA_076630	100.m009962	pantothenate transporter, putative
7024789	XM_002147114.1	XP_002147150.1	PMAA_076640	100.m009963	conserved hypothetical protein
7024791	XM_002147116.1	XP_002147152.1	PMAA_076660	100.m009964	conserved hypothetical protein
7024792	XM_002147117.1	XP_002147153.1	PMAA_076670	100.m009965	ankyrin repeat domain protein, putative
7024793	XM_002147118.1	XP_002147154.1	PMAA_076680	100.m009966	conserved hypothetical protein
7024794	XM_002147119.1	XP_002147155.1	PMAA_076690	100.m009968	hypothetical protein
7024795	XM_002147120.1	XP_002147156.1	PMAA_076700	100.m009969	conserved hypothetical protein
7024796	XM_002147121.1	XP_002147157.1	PMAA_076710	100.m009970	hypothetical protein
7024797	XM_002147122.1	XP_002147158.1	PMAA_076720	100.m009971	hypothetical protein
7023595	XM_002145849.1	XP_002145885.1	PMAA_064530	100.m09973	C6 transcription factor, putative
7024621	XM_002146938.1	XP_002146974.1	PMAA_074960	100.m09974	F-box domain protein
7024790	XM_002147115.1	XP_002147151.1	PMAA_076650	100.m09975	monocarboxylate permease mch4, putative
7024779	XM_002147104.1	XP_002147140.1	PMAA_076540	100.m09976	hypothetical protein
7026160	XM_002147123.1	XP_002147159.1	PMAA_076820	102.m007756	DNA helicase recq, putative
7024820	XM_002147124.1	XP_002147160.1	PMAA_076830	102.m007757	DNA helicase recq, putative
7024816	XM_002147125.1	XP_002147161.1	PMAA_076840	102.m007758	conserved hypothetical protein
7024817	XM_002147126.1	XP_002147162.1	PMAA_076850	102.m007759	conserved hypothetical protein
7024818	XM_002147127.1	XP_002147163.1	PMAA_076860	102.m007760	hypothetical protein
7024819	XM_002147128.1	XP_002147164.1	PMAA_076870	102.m007764	hypothetical protein
7024821	XM_002147129.1	XP_002147165.1	PMAA_076880	102.m007765	hypothetical protein
7024822	XM_002147130.1	XP_002147166.1	PMAA_076890	102.m007766	hypothetical protein
7024823	XM_002147131.1	XP_002147167.1	PMAA_076900	102.m007767	extracellular phytase, putative
7024824	XM_002147132.1	XP_002147168.1	PMAA_076910	102.m007768	glucose oxidase, putative
7024825	XM_002147133.1	XP_002147169.1	PMAA_076920	102.m007769	mannitol dehydrogenase, putative
7024826	XM_002147134.1	XP_002147170.1	PMAA_076930	102.m007770	hypothetical protein
7024827	XM_002147135.1	XP_002147171.1	PMAA_076940	102.m007771	conserved hypothetical protein
7024828	XM_002147136.1	XP_002147172.1	PMAA_076950	102.m007772	sugar transporter, putative
7024829	XM_002147137.1	XP_002147173.1	PMAA_076960	102.m007773	conserved hypothetical protein
7024830	XM_002147138.1	XP_002147174.1	PMAA_076970	102.m007774	beta-galactosidase, putative
7024831	XM_002147139.1	XP_002147175.1	PMAA_076980	102.m007775	conserved hypothetical protein
7024832	XM_002147140.1	XP_002147176.1	PMAA_076990	102.m007776	hypothetical protein
7024833	XM_002147141.1	XP_002147177.1	PMAA_077000	102.m007777	2-haloalkanoic acid dehalogenase, putative
7024834	XM_002147142.1	XP_002147178.1	PMAA_077010	102.m007778	conserved hypothetical protein
7024835	XM_002147143.1	XP_002147179.1	PMAA_077020	102.m007779	hypothetical protein
7024836	XM_002147144.1	XP_002147180.1	PMAA_077030	102.m007780	glutathione S-transferase, putative
7024837	XM_002147145.1	XP_002147181.1	PMAA_077040	102.m007781	hypothetical protein
7024837	XM_002147146.1	XP_002147182.1	PMAA_077040	102.m007781	hypothetical protein
7024838	XM_002147147.1	XP_002147183.1	PMAA_077050	102.m007783	NACHT domain protein
7024839	XM_002147148.1	XP_002147184.1	PMAA_077060	102.m007784	short-chain dehydrogenase/reductase family protein, putative
7024840	XM_002147149.1	XP_002147185.1	PMAA_077070	102.m007785	conserved hypothetical protein
7024841	XM_002147150.1	XP_002147186.1	PMAA_077080	102.m007786	hypothetical protein
7024842	XM_002147151.1	XP_002147187.1	PMAA_077090	102.m007787	ankyrin repeat-cotaining protein, putative
7024843	XM_002147152.1	XP_002147188.1	PMAA_077100	102.m007788	cytochrome P450, putative
7024844	XM_002147153.1	XP_002147189.1	PMAA_077110	102.m007789	conserved hypothetical protein
7024845	XM_002147154.1	XP_002147190.1	PMAA_077120	102.m007790	conserved hypothetical protein
7024846	XM_002147155.1	XP_002147191.1	PMAA_077130	102.m007791	conserved hypothetical protein
7024847	XM_002147156.1	XP_002147192.1	PMAA_077140	102.m007792	ankyrin repeat-cotaining protein, putative
7024848	XM_002147157.1	XP_002147193.1	PMAA_077150	102.m007793	conserved hypothetical protein
7024849	XM_002147158.1	XP_002147194.1	PMAA_077160	102.m007794	nucleoplasmin, putative
7024850	XM_002147160.1	XP_002147196.1	PMAA_077170	102.m007795	hypothetical protein
7024852	XM_002147159.1	XP_002147195.1	PMAA_077180	102.m007796	hypothetical protein
7024851	XM_002147161.1	XP_002147197.1	PMAA_077190	102.m007797	Pfs, NACHT and WD domain protein
7024853	XM_002147162.1	XP_002147198.1	PMAA_077200	102.m007798	conserved hypothetical protein
7024854	XM_002147163.1	XP_002147199.1	PMAA_077210	102.m007799	conserved hypothetical protein
7024855	XM_002147164.1	XP_002147200.1	PMAA_077220	102.m007800	conserved hypothetical protein
7024856	XM_002147165.1	XP_002147201.1	PMAA_077230	102.m007801	podosporapepsin precursor, putative
7024857	XM_002147166.1	XP_002147202.1	PMAA_077240	102.m007802	conserved hypothetical protein
7024858	XM_002147167.1	XP_002147203.1	PMAA_077250	102.m007803	aldo-keto reductase, putative
7024859	XM_002147168.1	XP_002147204.1	PMAA_077260	102.m007804	conserved hypothetical protein
7024860	XM_002147169.1	XP_002147205.1	PMAA_077270	102.m007806	hypothetical protein
7024861	XM_002147170.1	XP_002147206.1	PMAA_077280	102.m007807	monooxygenase, putative
7024862	XM_002147171.1	XP_002147207.1	PMAA_077290	102.m007808	conserved hypothetical protein
7024863	XM_002147172.1	XP_002147208.1	PMAA_077300	102.m007809	ammonium transporter, putative
7024864	XM_002147173.1	XP_002147209.1	PMAA_077310	102.m007810	transcriptional regulator, putative
7024865	XM_002147174.1	XP_002147210.1	PMAA_077320	102.m007811	aspergillopepsin, putative
7024866	XM_002147175.1	XP_002147211.1	PMAA_077330	102.m007812	flavin dependent monooxygenase, putative
7024867	XM_002147176.1	XP_002147212.1	PMAA_077340	102.m007813	hypothetical protein
7024868	XM_002147177.1	XP_002147213.1	PMAA_077350	102.m007814	conserved hypothetical protein
7024869	XM_002147178.1	XP_002147214.1	PMAA_077360	102.m007815	RTA1 domain protein, putative
7024870	XM_002147179.1	XP_002147215.1	PMAA_077370	102.m007816	proline-specific permease, putative
7024871	XM_002147180.1	XP_002147216.1	PMAA_077380	102.m007817	yapsin, putative
7024872	XM_002147181.1	XP_002147217.1	PMAA_077390	102.m007818	hypothetical protein
7024873	XM_002147182.1	XP_002147218.1	PMAA_077400	102.m007819	conserved hypothetical protein
7024874	XM_002147183.1	XP_002147219.1	PMAA_077410	102.m007820	aminotransferase family protein (LolT), putative
7024875	XM_002147184.1	XP_002147220.1	PMAA_077420	102.m007821	hypothetical protein
7024876	XM_002147185.1	XP_002147221.1	PMAA_077430	102.m007822	hypothetical protein
7024877	XM_002147186.1	XP_002147222.1	PMAA_077440	102.m007823	conserved hypothetical protein
7024878	XM_002147187.1	XP_002147223.1	PMAA_077450	102.m007824	hypothetical protein
7024879	XM_002147188.1	XP_002147224.1	PMAA_077460	102.m007825	conserved hypothetical protein
7024880	XM_002147189.1	XP_002147225.1	PMAA_077470	102.m007826	hypothetical protein
7024881	XM_002147190.1	XP_002147226.1	PMAA_077480	102.m007827	cytochrome P450, putative
7024882	XM_002147191.1	XP_002147227.1	PMAA_077490	102.m007829	Kelch repeat protein
7024882	XM_002147192.1	XP_002147228.1	PMAA_077490	102.m007829	Kelch repeat protein
7024882	XM_002147193.1	XP_002147229.1	PMAA_077490	102.m007829	Kelch repeat protein
7024883	XM_002147194.1	XP_002147230.1	PMAA_077500	102.m007830	iron-regulated transporter, putative
7024884	XM_002147195.1	XP_002147231.1	PMAA_077510	102.m007831	conserved hypothetical protein
7024885	XM_002147196.1	XP_002147232.1	PMAA_077520	102.m007832	conserved hypothetical protein
7024886	XM_002147197.1	XP_002147233.1	PMAA_077530	102.m007833	3-hydroxyacyl-CoA dehydrogenase, putative
7024887	XM_002147198.1	XP_002147234.1	PMAA_077540	102.m007834	monooxygenase, putative
7024888	XM_002147199.1	XP_002147235.1	PMAA_077550	102.m007835	conserved hypothetical protein
7024889	XM_002147200.1	XP_002147236.1	PMAA_077560	102.m007836	conserved hypothetical protein
7024890	XM_002147201.1	XP_002147237.1	PMAA_077570	102.m007837	conserved hypothetical protein
7024891	XM_002147202.1	XP_002147238.1	PMAA_077580	102.m007838	alpha-ketoglutarate-dependent sulfonate dioxygenase, putative
7024892	XM_002147203.1	XP_002147239.1	PMAA_077590	102.m007839	conserved hypothetical protein
7024893	XM_002147204.1	XP_002147240.1	PMAA_077600	102.m007840	adenosine deaminase, putative
7024894	XM_002147205.1	XP_002147241.1	PMAA_077610	102.m007841	conserved hypothetical protein
7024895	XM_002147206.1	XP_002147242.1	PMAA_077620	102.m007842	pyruvate decarboxylase, putative
7024896	XM_002147207.1	XP_002147243.1	PMAA_077630	102.m007843	hypothetical protein
7024897	XM_002147208.1	XP_002147244.1	PMAA_077640	102.m007844	aldehyde dehydrogenase, putative
7024898	XM_002147209.1	XP_002147245.1	PMAA_077650	102.m007845	conserved hypothetical protein
7024899	XM_002147210.1	XP_002147246.1	PMAA_077660	102.m007846	ABC multidrug transporter, putative
7024900	XM_002147211.1	XP_002147247.1	PMAA_077670	102.m007847	RNA polymerase II mediator complex protein (Med7), putative
7024900	XM_002147212.1	XP_002147248.1	PMAA_077670	102.m007847	RNA polymerase II mediator complex protein (Med7), putative
7024901	XM_002147213.1	XP_002147249.1	PMAA_077680	102.m007848	PAP2 domain protein
7024901	XM_002147214.1	XP_002147250.1	PMAA_077680	102.m007848	PAP2 domain protein
7024902	XM_002147215.1	XP_002147251.1	PMAA_077690	102.m007849	lipid transfer protein, putative
7024903	XM_002147216.1	XP_002147252.1	PMAA_077700	102.m007850	conserved hypothetical protein
7024904	XM_002147217.1	XP_002147253.1	PMAA_077710	102.m007851	glucan 1,3-beta-glucosidase precursor, putative
7024905	XM_002147218.1	XP_002147254.1	PMAA_077720	102.m007852	hypothetical protein
7024906	XM_002147219.1	XP_002147255.1	PMAA_077730	102.m007853	hypothetical protein
7024907	XM_002147220.1	XP_002147256.1	PMAA_077740	102.m007854	hypothetical protein
7026154	XM_002147221.1	XP_002147257.1	PMAA_077770	102.m007856	methionine aminopeptidase, type II, putative
7024909	XM_002147222.1	XP_002147258.1	PMAA_077780	102.m007857	hypothetical protein
7024910	XM_002147223.1	XP_002147259.1	PMAA_077790	102.m007858	RanBP1 domain protein
7024911	XM_002147224.1	XP_002147260.1	PMAA_077800	102.m007859	60S ribosomal protein L31e
7024912	XM_002147225.1	XP_002147261.1	PMAA_077810	102.m007860	nitrilase family protein (Nit3), putative
7024913	XM_002147226.1	XP_002147262.1	PMAA_077820	102.m007861	conserved hypothetical protein
7024914	XM_002147227.1	XP_002147263.1	PMAA_077830	102.m007862	hypothetical protein
7024915	XM_002147228.1	XP_002147264.1	PMAA_077840	102.m007863	endochitinase 1 precursor, putative
7024916	XM_002147229.1	XP_002147265.1	PMAA_077850	102.m007864	autophagy regulatory protein Atg2, putative
7024917	XM_002147230.1	XP_002147266.1	PMAA_077860	102.m007865	CECR1 family adenosine deaminase, putative
7024918	XM_002147231.1	XP_002147267.1	PMAA_077870	102.m007866	conserved hypothetical protein
7024919	XM_002147232.1	XP_002147268.1	PMAA_077880	102.m007867	conserved hypothetical protein
7024920	XM_002147233.1	XP_002147269.1	PMAA_077890	102.m007868	multidrug resistance protein fnx1, putative
7024921	XM_002147234.1	XP_002147270.1	PMAA_077900	102.m007869	conserved hypothetical protein
7024921	XM_002147235.1	XP_002147271.1	PMAA_077900	102.m007869	conserved hypothetical protein
7024922	XM_002147236.1	XP_002147272.1	PMAA_077910	102.m007870	hybrid PKS-NRPS PsoA
7024923	XM_002147237.1	XP_002147273.1	PMAA_077920	102.m007871	short chain dehydrogenase/reductase
7024924	XM_002147238.1	XP_002147274.1	PMAA_077930	102.m007872	NupC family nucleoside cotransporter
7024925	XM_002147239.1	XP_002147275.1	PMAA_077940	102.m007873	hexose carrier protein, putative
7024925	XM_002147240.1	XP_002147276.1	PMAA_077940	102.m007873	hexose carrier protein, putative
7024926	XM_002147241.1	XP_002147277.1	PMAA_077950	102.m007874	hypothetical protein
7024927	XM_002147242.1	XP_002147278.1	PMAA_077960	102.m007875	ubiquitin conjugating enzyme (UbcK), putative
7024928	XM_002147243.1	XP_002147279.1	PMAA_077970	102.m007876	serine/threonine protein kinase, putative
7024929	XM_002147244.1	XP_002147280.1	PMAA_077980	102.m007877	conserved hypothetical protein
7024930	XM_002147245.1	XP_002147281.1	PMAA_077990	102.m007878	3,4-dihydroxy-2-butanone 4-phosphate synthase
7024931	XM_002147246.1	XP_002147282.1	PMAA_078000	102.m007879	transcription initiation factor TFIIE, beta subunit, putative
7024932	XM_002147247.1	XP_002147283.1	PMAA_078010	102.m007880	filament-forming protein (Tpr/p270), putative
7024933	XM_002147248.1	XP_002147284.1	PMAA_078020	102.m007881	transferase hexapeptide domain protein
7024934	XM_002147249.1	XP_002147285.1	PMAA_078030	102.m007882	conserved hypothetical protein
7024935	XM_002147250.1	XP_002147286.1	PMAA_078040	102.m007883	magnesium dependent phosphatase, putative
7024936	XM_002147251.1	XP_002147287.1	PMAA_078050	102.m007884	cell division control protein Cdc4, putative
7024937	XM_002147252.1	XP_002147288.1	PMAA_078060	102.m007885	conserved hypothetical protein
7024938	XM_002147253.1	XP_002147289.1	PMAA_078070	102.m007886	toxin biosynthesis ketoreductase, putative
7024939	XM_002147254.1	XP_002147290.1	PMAA_078080	102.m007887	conserved hypothetical protein
7024940	XM_002147255.1	XP_002147291.1	PMAA_078090	102.m007888	UDP-galactose transporter, putative
7024941	XM_002147256.1	XP_002147292.1	PMAA_078100	102.m007889	DEAD/DEAH box DNA helicase (Mer3), putative
7024942	XM_002147257.1	XP_002147293.1	PMAA_078110	102.m007890	GTP binding protein (EngB), putative
7024943	XM_002147258.1	XP_002147294.1	PMAA_078120	102.m007891	AP-3 adaptor complex subunit sigma, putative
7024944	XM_002147259.1	XP_002147295.1	PMAA_078130	102.m007892	cytosolic large ribosomal subunit protein L7A
7024945	XM_002147260.1	XP_002147296.1	PMAA_078140	102.m007893	short-chain dehydrogenases/reductase, putative
7024946	XM_002147261.1	XP_002147297.1	PMAA_078150	102.m007894	spindle pole body component, putative
7024947	XM_002147262.1	XP_002147298.1	PMAA_078160	102.m007895	FAD dependent oxidoreductase, putative
7024948	XM_002147263.1	XP_002147299.1	PMAA_078170	102.m007896	anthranilate synthase component I, putative
7024949	XM_002147264.1	XP_002147300.1	PMAA_078180	102.m007897	conserved hypothetical protein
7024950	XM_002147265.1	XP_002147301.1	PMAA_078190	102.m007898	WD repeat protein
7024951	XM_002147266.1	XP_002147302.1	PMAA_078200	102.m007899	rhomboid family protein, putative
7024952	XM_002147267.1	XP_002147303.1	PMAA_078210	102.m007900	50S ribosomal protein Mrp49
7024953	XM_002147268.1	XP_002147304.1	PMAA_078220	102.m007901	leucyl-tRNA synthetase
7024954	XM_002147269.1	XP_002147305.1	PMAA_078230	102.m007902	EH domain binding protein epsin 2
7024955	XM_002147270.1	XP_002147306.1	PMAA_078240	102.m007903	conserved hypothetical protein
7024956	XM_002147271.1	XP_002147307.1	PMAA_078250	102.m007904	conserved hypothetical protein
7024957	XM_002147272.1	XP_002147308.1	PMAA_078260	102.m007905	40S ribosomal protein S10b
7024958	XM_002147273.1	XP_002147309.1	PMAA_078270	102.m007906	hypothetical protein
7024959	XM_002147274.1	XP_002147310.1	PMAA_078280	102.m007907	hypothetical protein
7024960	XM_002147275.1	XP_002147311.1	PMAA_078290	102.m007908	conserved hypothetical protein
7024961	XM_002147276.1	XP_002147312.1	PMAA_078300	102.m007909	HIT domain protein
7024962	XM_002147277.1	XP_002147313.1	PMAA_078310	102.m007910	CRAL/TRIO domain protein
7024963	XM_002147278.1	XP_002147314.1	PMAA_078320	102.m007911	DASH complex component Dam1, putative
7024964	XM_002147279.1	XP_002147315.1	PMAA_078330	102.m007912	ubiquitin hydrolase Ubp8, putative
7024965	XM_002147280.1	XP_002147316.1	PMAA_078340	102.m007913	integral membrane protein
7024966	XM_002147281.1	XP_002147317.1	PMAA_078350	102.m007914	rhomboid family protein, putative
7024967	XM_002147282.1	XP_002147318.1	PMAA_078360	102.m007915	GPI transamidase component (GAA1), putative
7024968	XM_002147283.1	XP_002147319.1	PMAA_078370	102.m007916	proteasome regulatory particle subunit (RpnI), putative
7024969	XM_002147284.1	XP_002147320.1	PMAA_078380	102.m007917	conserved hypothetical protein
7024970	XM_002147285.1	XP_002147321.1	PMAA_078390	102.m007918	NADH-ubiquinone oxidoreductase 39 kDa subunit, putative
7024970	XM_002147286.1	XP_002147322.1	PMAA_078390	102.m007918	NADH-ubiquinone oxidoreductase 39 kDa subunit, putative
7024971	XM_002147287.1	XP_002147323.1	PMAA_078400	102.m007919	transposable element tc1 transposase, putative
7024972	XM_002147288.1	XP_002147324.1	PMAA_078410	102.m007920	Ran-interacting protein Mog1, putative
7024973	XM_002147289.1	XP_002147325.1	PMAA_078420	102.m007921	conserved hypothetical protein
7024974	XM_002147290.1	XP_002147326.1	PMAA_078430	102.m007922	protein transport protein Sec24, putative
7024975	XM_002147291.1	XP_002147327.1	PMAA_078440	102.m007923	kinesin family protein
7024976	XM_002147292.1	XP_002147328.1	PMAA_078450	102.m007924	uroporphyrinogen-III synthase (UroS), putative
7024977	XM_002147293.1	XP_002147329.1	PMAA_078460	102.m007925	conserved hypothetical protein
7024978	XM_002147294.1	XP_002147330.1	PMAA_078470	102.m007926	chaperone/heat shock protein Hsp12, putative
7024979	XM_002147295.1	XP_002147331.1	PMAA_078480	102.m007927	conserved hypothetical protein
7024980	XM_002147296.1	XP_002147332.1	PMAA_078490	102.m007928	Golgi transport complex subunit Cog6, putative
7024981	XM_002147297.1	XP_002147333.1	PMAA_078500	102.m007929	NGG1 interacting factor Nif3, putative
7024982	XM_002147298.1	XP_002147334.1	PMAA_078510	102.m007930	BolA domain protein
7024983	XM_002147299.1	XP_002147335.1	PMAA_078520	102.m007931	AhpC/TSA family protein
7024984	XM_002147300.1	XP_002147336.1	PMAA_078530	102.m007932	RAS small monomeric GTPase (Rsr1), putative
7024985	XM_002147301.1	XP_002147337.1	PMAA_078540	102.m007933	3-methylcrotonyl-CoA carboxylase, beta subunit (MccB), putative
7024986	XM_002147302.1	XP_002147338.1	PMAA_078550	102.m007934	isovaleryl-CoA dehydrogenase IvdA, putative
7024986	XM_002147303.1	XP_002147339.1	PMAA_078550	102.m007934	isovaleryl-CoA dehydrogenase IvdA, putative
7024987	XM_002147304.1	XP_002147340.1	PMAA_078560	102.m007935	Hsp70 family protein
7024988	XM_002147305.1	XP_002147341.1	PMAA_078570	102.m007936	hypothetical protein
7024989	XM_002147306.1	XP_002147342.1	PMAA_078580	102.m007937	conserved hypothetical protein
7024990	XM_002147307.1	XP_002147343.1	PMAA_078590	102.m007938	ankyrin repeat-cotaining protein, putative
7024991	XM_002147308.1	XP_002147344.1	PMAA_078600	102.m007939	lipase/esterase, putative
7024994	XM_002147309.1	XP_002147345.1	PMAA_078620	102.m007940	hypothetical protein
7024992	XM_002147310.1	XP_002147346.1	PMAA_078610	102.m007941	conserved hypothetical protein
7024993	XM_002147311.1	XP_002147347.1	PMAA_078630	102.m007942	conserved hypothetical protein
7024995	XM_002147312.1	XP_002147348.1	PMAA_078640	102.m007943	ankyrin repeat-cotaining protein, putative
7024996	XM_002147313.1	XP_002147349.1	PMAA_078650	102.m007944	conserved hypothetical protein
7024997	XM_002147314.1	XP_002147350.1	PMAA_078660	102.m007945	conserved hypothetical protein
7024998	XM_002147315.1	XP_002147351.1	PMAA_078670	102.m007946	conserved hypothetical protein
7024999	XM_002147316.1	XP_002147352.1	PMAA_078680	102.m007947	pogo transposable element, putative
7025000	XM_002147317.1	XP_002147353.1	PMAA_078690	102.m007948	glutamate-1-semialdehyde 2,1-aminomutase, putative
7025001	XM_002147318.1	XP_002147354.1	PMAA_078700	102.m007949	monocarboxylate permease, putative
7025002	XM_002147319.1	XP_002147355.1	PMAA_078710	102.m007950	group II plp decarboxylase, putative
7025003	XM_002147320.1	XP_002147356.1	PMAA_078720	102.m007951	hypothetical protein
7025004	XM_002147321.1	XP_002147357.1	PMAA_078730	102.m007952	conserved hypothetical protein
7025005	XM_002147322.1	XP_002147358.1	PMAA_078740	102.m007953	conserved hypothetical protein
7025006	XM_002147323.1	XP_002147359.1	PMAA_078750	102.m007954	hypothetical protein
7025007	XM_002147324.1	XP_002147360.1	PMAA_078760	102.m007955	endothiapepsin precursor, putative
7025008	XM_002147325.1	XP_002147361.1	PMAA_078770	102.m007956	hypothetical protein
7025009	XM_002147326.1	XP_002147362.1	PMAA_078780	102.m007960	D-arabinitol dehydrogenase ArbD, putative
7025010	XM_002147327.1	XP_002147363.1	PMAA_078790	102.m007961	3-methylcrotonyl-CoA carboxylase subunit alpha (MccA), putative
7025011	XM_002147328.1	XP_002147364.1	PMAA_078800	102.m007962	conserved hypothetical protein
7025012	XM_002147329.1	XP_002147365.1	PMAA_078810	102.m007963	conserved hypothetical protein
7025013	XM_002147330.1	XP_002147366.1	PMAA_078820	102.m007964	conserved hypothetical protein
7025014	XM_002147331.1	XP_002147367.1	PMAA_078830	102.m007965	conserved hypothetical protein
7025015	XM_002147332.1	XP_002147368.1	PMAA_078840	102.m007966	conserved hypothetical protein
7025016	XM_002147333.1	XP_002147369.1	PMAA_078850	102.m007967	transcriptional regulator (Cti6), putative
7025017	XM_002147334.1	XP_002147370.1	PMAA_078860	102.m007968	conserved hypothetical protein
7025018	XM_002147335.1	XP_002147371.1	PMAA_078870	102.m007969	Woronin body protein HexA, putative
7025019	XM_002147336.1	XP_002147372.1	PMAA_078880	102.m007970	carbonyl reductase, putative
7025020	XM_002147337.1	XP_002147373.1	PMAA_078890	102.m007971	conserved hypothetical protein
7025021	XM_002147338.1	XP_002147374.1	PMAA_078900	102.m007972	epoxide hydrolase, putative
7025022	XM_002147339.1	XP_002147375.1	PMAA_078910	102.m007973	conserved hypothetical protein
7025023	XM_002147340.1	XP_002147376.1	PMAA_078920	102.m007974	conserved hypothetical protein
7025024	XM_002147341.1	XP_002147377.1	PMAA_078930	102.m007975	ankyrin repeat-cotaining protein, putative
7025025	XM_002147342.1	XP_002147378.1	PMAA_078940	102.m007976	cell wall glucanase, putative
7025026	XM_002147343.1	XP_002147379.1	PMAA_078950	102.m007977	conserved hypothetical protein
7025027	XM_002147344.1	XP_002147380.1	PMAA_078960	102.m007978	conserved hypothetical protein
7025028	XM_002147345.1	XP_002147381.1	PMAA_078970	102.m007979	conserved hypothetical protein
7025029	XM_002147346.1	XP_002147382.1	PMAA_078980	102.m007980	DHHC zinc finger membrane protein
7025030	XM_002147347.1	XP_002147383.1	PMAA_078990	102.m007981	vacuole-associated enzyme activator complex component (Vac14), putative
7025031	XM_002147348.1	XP_002147384.1	PMAA_079000	102.m007982	dsDNA-dependent ATPase Rad54, putative
7025032	XM_002147349.1	XP_002147385.1	PMAA_079010	102.m007983	mitochondrial carrier protein, putative
7025033	XM_002147350.1	XP_002147386.1	PMAA_079020	102.m007984	conserved hypothetical protein
7025034	XM_002147351.1	XP_002147387.1	PMAA_079030	102.m007985	C2H2 finger domain protein, putative
7025035	XM_002147352.1	XP_002147388.1	PMAA_079040	102.m007986	mitochondrial aconitate hydratase, putative
7025036	XM_002147353.1	XP_002147389.1	PMAA_079050	102.m007987	metallo-beta-lactamase domain protein, putative
7025037	XM_002147354.1	XP_002147390.1	PMAA_079060	102.m007988	trehalose-phosphate synthase/phosphatase complex subunit Tps1, putative
7025038	XM_002147355.1	XP_002147391.1	PMAA_079070	102.m007989	hypothetical protein
7025039	XM_002147356.1	XP_002147392.1	PMAA_079080	102.m007990	AAA family ATPase, putative
7025040	XM_002147357.1	XP_002147393.1	PMAA_079090	102.m007991	mitochondrial carrier protein, putative
7025041	XM_002147358.1	XP_002147394.1	PMAA_079100	102.m007992	RING finger protein
7025041	XM_002147359.1	XP_002147395.1	PMAA_079100	102.m007992	RING finger protein
7025042	XM_002147360.1	XP_002147396.1	PMAA_079110	102.m007993	hypothetical protein
7025043	XM_002147361.1	XP_002147397.1	PMAA_079120	102.m007994	O-methyltransferase, putative
7025044	XM_002147362.1	XP_002147398.1	PMAA_079130	102.m007995	conserved hypothetical protein
7025045	XM_002147363.1	XP_002147399.1	PMAA_079140	102.m007996	conserved hypothetical protein
7025046	XM_002147364.1	XP_002147400.1	PMAA_079150	102.m007997	conserved hypothetical protein
7025047	XM_002147365.1	XP_002147401.1	PMAA_079160	102.m007998	translation initiation factor eif-2b epsilon subunit, putative
7025048	XM_002147366.1	XP_002147402.1	PMAA_079170	102.m007999	stress response transcription factor SrrA/Skn7, putative
7025049	XM_002147367.1	XP_002147403.1	PMAA_079180	102.m008000	conserved hypothetical protein
7025050	XM_002147368.1	XP_002147404.1	PMAA_079190	102.m008001	conserved hypothetical protein
7025051	XM_002147369.1	XP_002147405.1	PMAA_079200	102.m008002	glutathione S-transferase, putative
7025052	XM_002147370.1	XP_002147406.1	PMAA_079210	102.m008003	ER membrane protein Wsc4, putative
7025053	XM_002147371.1	XP_002147407.1	PMAA_079220	102.m008004	hypothetical protein
7025054	XM_002147372.1	XP_002147408.1	PMAA_079230	102.m008005	conserved glutamic acid rich protein
7025054	XM_002147373.1	XP_002147409.1	PMAA_079230	102.m008005	conserved glutamic acid rich protein
7025055	XM_002147374.1	XP_002147410.1	PMAA_079240	102.m008006	sister chromatid cohesion protein (Eso1), putative
7025056	XM_002147375.1	XP_002147411.1	PMAA_079250	102.m008007	hypothetical protein
7025057	XM_002147376.1	XP_002147412.1	PMAA_079260	102.m008008	transcription factor RfeG, putative
7025058	XM_002147377.1	XP_002147413.1	PMAA_079270	102.m008009	conserved hypothetical protein
7025059	XM_002147378.1	XP_002147414.1	PMAA_079280	102.m008010	NADH-ubiquinone oxidoreductase 9.5 kDa subunit, putative
7025060	XM_002147379.1	XP_002147415.1	PMAA_079290	102.m008011	oligosaccharyl transferase subunit (beta), putative
7025061	XM_002147380.1	XP_002147416.1	PMAA_079300	102.m008012	cytochrome c oxidase assembly protein (Pet191), putative
7025061	XM_002147381.1	XP_002147417.1	PMAA_079300	102.m008012	cytochrome c oxidase assembly protein (Pet191), putative
7025062	XM_002147382.1	XP_002147418.1	PMAA_079310	102.m008013	protease S8 tripeptidyl peptidase I, putative
7025063	XM_002147383.1	XP_002147419.1	PMAA_079320	102.m008014	triglyceride lipase-cholesterol esterase, putative
7025063	XM_002147384.1	XP_002147420.1	PMAA_079320	102.m008014	triglyceride lipase-cholesterol esterase, putative
7025064	XM_002147385.1	XP_002147421.1	PMAA_079330	102.m008015	conserved hypothetical protein
7025065	XM_002147386.1	XP_002147422.1	PMAA_079340	102.m008016	signal transduction protein Syg1, putative
7025066	XM_002147387.1	XP_002147423.1	PMAA_079350	102.m008017	Bax Inhibitor family protein
7025067	XM_002147388.1	XP_002147424.1	PMAA_079360	102.m008018	amino acid transporter, putative
7025068	XM_002147389.1	XP_002147425.1	PMAA_079370	102.m008019	short chain dehydrogenase/reductase family oxidoreductase, putative
7025069	XM_002147390.1	XP_002147426.1	PMAA_079380	102.m008020	conserved hypothetical protein
7025070	XM_002147391.1	XP_002147427.1	PMAA_079390	102.m008021	autophagic serine protease Alp2
7025071	XM_002147392.1	XP_002147428.1	PMAA_079400	102.m008022	Beige/BEACH domain protein
7025072	XM_002147393.1	XP_002147429.1	PMAA_079410	102.m008023	transaldolase
7025073	XM_002147394.1	XP_002147430.1	PMAA_079420	102.m008024	Cu,Zn superoxide dismutase SOD1
7025074	XM_002147395.1	XP_002147431.1	PMAA_079430	102.m008025	transcription factor (Snd1/p100), putative
7025075	XM_002147396.1	XP_002147432.1	PMAA_079440	102.m008026	phosphatidylinositol transporter, putative
7025076	XM_002147397.1	XP_002147433.1	PMAA_079450	102.m008027	ubiquitin conjugating enzyme (UbcC), putative
7025077	XM_002147398.1	XP_002147434.1	PMAA_079460	102.m008028	ABC bile acid transporter, putative
7025078	XM_002147399.1	XP_002147435.1	PMAA_079470	102.m008029	DEAD box helicase involved in nonsense mediated decay, putative
7025079	XM_002147400.1	XP_002147436.1	PMAA_079480	102.m008030	transcription factor (SPT8), putative
7025080	XM_002147401.1	XP_002147437.1	PMAA_079490	102.m008031	conserved hypothetical protein
7025081	XM_002147402.1	XP_002147438.1	PMAA_079500	102.m008032	RNA binding protein, putative
7025082	XM_002147403.1	XP_002147439.1	PMAA_079510	102.m008033	conserved hypothetical protein
7025083	XM_002147404.1	XP_002147440.1	PMAA_079520	102.m008034	ankyrin repeat-cotaining protein, putative
7025084	XM_002147405.1	XP_002147441.1	PMAA_079530	102.m008035	RNA-directed RNA polymerase, putative
7025085	XM_002147406.1	XP_002147442.1	PMAA_079540	102.m008036	hypothetical protein
7025086	XM_002147407.1	XP_002147443.1	PMAA_079550	102.m008038	clock controled protein (Ccg-8), putative
7025087	XM_002147408.1	XP_002147444.1	PMAA_079560	102.m008039	hypothetical protein
7025088	XM_002147409.1	XP_002147445.1	PMAA_079570	102.m008040	carbonyl reductase, putative
7025089	XM_002147410.1	XP_002147446.1	PMAA_079580	102.m008041	conserved hypothetical protein
7025090	XM_002147411.1	XP_002147447.1	PMAA_079590	102.m008042	conserved hypothetical protein
7025091	XM_002147412.1	XP_002147448.1	PMAA_079600	102.m008043	polyubiquitin binding protein (Doa1/Ufd3), putative
7025092	XM_002147413.1	XP_002147449.1	PMAA_079610	102.m008044	AI-BP family protein
7025092	XM_002147414.1	XP_002147450.1	PMAA_079610	102.m008044	AI-BP family protein
7025093	XM_002147415.1	XP_002147451.1	PMAA_079620	102.m008045	37S ribosomal protein S16
7025094	XM_002147416.1	XP_002147452.1	PMAA_079630	102.m008046	RNA binding protein
7025095	XM_002147417.1	XP_002147453.1	PMAA_079640	102.m008047	conserved hypothetical protein
7025096	XM_002147418.1	XP_002147454.1	PMAA_079650	102.m008048	HLH DNA binding domain protein, putative
7025097	XM_002147419.1	XP_002147455.1	PMAA_079660	102.m008049	response regulator, putative
7025098	XM_002147420.1	XP_002147456.1	PMAA_079670	102.m008050	PQ loop repeat protein
7025099	XM_002147421.1	XP_002147457.1	PMAA_079680	102.m008051	high osmolarity signaling protein Sho1, putative
7025100	XM_002147422.1	XP_002147458.1	PMAA_079690	102.m008052	conserved hypothetical protein
7025101	XM_002147423.1	XP_002147459.1	PMAA_079700	102.m008053	AMP-binding enzyme, putative
7025102	XM_002147424.1	XP_002147460.1	PMAA_079710	102.m008054	serine/threonine protein kinase, putative
7025103	XM_002147425.1	XP_002147461.1	PMAA_079720	102.m008055	hypothetical protein
7025104	XM_002147426.1	XP_002147462.1	PMAA_079730	102.m008056	conserved hypothetical protein
7025105	XM_002147427.1	XP_002147463.1	PMAA_079740	102.m008057	spermine/spermidine synthase family protein
7025105	XM_002147428.1	XP_002147464.1	PMAA_079740	102.m008057	spermine/spermidine synthase family protein
7025106	XM_002147429.1	XP_002147465.1	PMAA_079750	102.m008058	conserved hypothetical protein
7025107	XM_002147430.1	XP_002147466.1	PMAA_079760	102.m008059	dynein family protein
7025108	XM_002147431.1	XP_002147467.1	PMAA_079770	102.m008060	conserved hypothetical protein
7025109	XM_002147432.1	XP_002147468.1	PMAA_079780	102.m008061	phosphatidylinositol 3,5-bisphosphate-binding protein, putative
7025110	XM_002147433.1	XP_002147469.1	PMAA_079790	102.m008062	septin AspA, putative
7025111	XM_002147434.1	XP_002147470.1	PMAA_079800	102.m008063	Rho guanyl nucleotide exchange factor (Rom2), putative
7025112	XM_002147435.1	XP_002147471.1	PMAA_079810	102.m008064	vacuolar ATPase proteolipid subunit c, putative
7025112	XM_002147436.1	XP_002147472.1	PMAA_079810	102.m008064	vacuolar ATPase proteolipid subunit c, putative
7025113	XM_002147437.1	XP_002147473.1	PMAA_079820	102.m008065	cAMP-dependent protein kinase catalytic subunit, putative
7025114	XM_002147438.1	XP_002147474.1	PMAA_079830	102.m008066	alpha-1,6-mannosyltransferase subunit (Och1), putative
7025115	XM_002147439.1	XP_002147475.1	PMAA_079840	102.m008067	homoserine O-acetyltransferase
7025116	XM_002147440.1	XP_002147476.1	PMAA_079850	102.m008068	ThiF domain protein, putative
7025117	XM_002147441.1	XP_002147477.1	PMAA_079860	102.m008069	Ser/Thr protein phosphatase family
7025118	XM_002147442.1	XP_002147478.1	PMAA_079870	102.m008070	LCCL domain protein
7025119	XM_002147443.1	XP_002147479.1	PMAA_079880	102.m008071	hypothetical protein
7025120	XM_002147444.1	XP_002147480.1	PMAA_079890	102.m008072	integral membrane protein
7025121	XM_002147445.1	XP_002147481.1	PMAA_079900	102.m008073	conserved hypothetical protein
7025122	XM_002147446.1	XP_002147482.1	PMAA_079910	102.m008074	nuclear protein Qri2/Nse4, putative
7025123	XM_002147447.1	XP_002147483.1	PMAA_079920	102.m008075	phosphoinositide 3-kinase, putative
7025124	XM_002147448.1	XP_002147484.1	PMAA_079930	102.m008076	conserved hypothetical protein
7025125	XM_002147449.1	XP_002147485.1	PMAA_079940	102.m008077	mitochondrial GTPase (YlqF), putative
7025126	XM_002147450.1	XP_002147486.1	PMAA_079950	102.m008078	pre-mRNA splicing factor, putative
7025127	XM_002147451.1	XP_002147487.1	PMAA_079960	102.m008079	myosin type II heavy chain, putative
7025128	XM_002147452.1	XP_002147488.1	PMAA_079970	102.m008080	conserved hypothetical protein
7025128	XM_002147453.1	XP_002147489.1	PMAA_079970	102.m008080	conserved hypothetical protein
7025129	XM_002147454.1	XP_002147490.1	PMAA_079980	102.m008081	conserved hypothetical protein
7025130	XM_002147455.1	XP_002147491.1	PMAA_079990	102.m008082	hypothetical protein
7025131	XM_002147456.1	XP_002147492.1	PMAA_080000	102.m008083	ABC iron exporter Atm1, putative
7025132	XM_002147457.1	XP_002147493.1	PMAA_080010	102.m008084	mitochondrial protein Fmp26, putative
7025133	XM_002147458.1	XP_002147494.1	PMAA_080020	102.m008085	SprT family metallopeptidase, putative
7025134	XM_002147459.1	XP_002147495.1	PMAA_080030	102.m008086	1,3-beta-glucan synthase catalytic subunit FksP
7025135	XM_002147460.1	XP_002147496.1	PMAA_080040	102.m008087	serine palmitoyl CoA transferase subunit LcbA
7025136	XM_002147461.1	XP_002147497.1	PMAA_080050	102.m008088	cell wall glucanase (Scw4), putative
7025137	XM_002147462.1	XP_002147498.1	PMAA_080060	102.m008089	conserved hypothetical protein
7025138	XM_002147463.1	XP_002147499.1	PMAA_080070	102.m008090	class I alpha-mannosidase 1A
7025139	XM_002147464.1	XP_002147500.1	PMAA_080080	102.m008091	autophagy protein Apg9, putative
7025140	XM_002147465.1	XP_002147501.1	PMAA_080090	102.m008092	GTPase activating protein (BUD2/CLA2), putative
7025141	XM_002147466.1	XP_002147502.1	PMAA_080100	102.m008093	WD domain protein
7025142	XM_002147467.1	XP_002147503.1	PMAA_080110	102.m008094	conserved hypothetical protein
7025143	XM_002147468.1	XP_002147504.1	PMAA_080120	102.m008095	RNP domain protein
7025144	XM_002147469.1	XP_002147505.1	PMAA_080130	102.m008096	PH domain protein
7025145	XM_002147470.1	XP_002147506.1	PMAA_080140	102.m008097	NADH-ubiquinone oxidoreductase 213 kDa subunit
7025146	XM_002147471.1	XP_002147507.1	PMAA_080150	102.m008098	ubiquitin hydrolase, putative
7025147	XM_002147472.1	XP_002147508.1	PMAA_080160	102.m008099	MAP kinase MpkA
7025148	XM_002147473.1	XP_002147509.1	PMAA_080170	102.m008100	conserved hypothetical protein
7025149	XM_002147474.1	XP_002147510.1	PMAA_080180	102.m008101	pyoverdine/dityrosine biosynthesis protein, putative
7025150	XM_002147475.1	XP_002147511.1	PMAA_080190	102.m008102	monooxygenase, putative
7025151	XM_002147476.1	XP_002147512.1	PMAA_080200	102.m008103	conserved hypothetical protein
7025152	XM_002147477.1	XP_002147513.1	PMAA_080210	102.m008104	short-chain dehydrogenase, putative
7025153	XM_002147478.1	XP_002147514.1	PMAA_080220	102.m008105	conserved hypothetical protein
7025154	XM_002147479.1	XP_002147515.1	PMAA_080230	102.m008106	conserved hypothetical protein
7025155	XM_002147480.1	XP_002147516.1	PMAA_080240	102.m008107	quinone oxidoreductase, putative
7025156	XM_002147481.1	XP_002147517.1	PMAA_080250	102.m008108	2,4-dichlorophenol 6-monooxygenase, putative
7025157	XM_002147482.1	XP_002147518.1	PMAA_080260	102.m008109	monocarboxylate permease, putative
7025158	XM_002147483.1	XP_002147519.1	PMAA_080270	102.m008110	branched-chain amino acid aminotransferase, putative
7025159	XM_002147484.1	XP_002147520.1	PMAA_080280	102.m008111	alpha methylacyl-CoA racemase, putative
7025160	XM_002147485.1	XP_002147521.1	PMAA_080290	102.m008112	metal homeostatis protein bsd2
7025160	XM_002147486.1	XP_002147522.1	PMAA_080290	102.m008112	metal homeostatis protein bsd2
7025161	XM_002147487.1	XP_002147523.1	PMAA_080300	102.m008113	conserved hypothetical protein
7025162	XM_002147488.1	XP_002147524.1	PMAA_080310	102.m008114	succinyl-CoA:3-ketoacid-coenzyme A transferase (ScoT), putative
7025163	XM_002147489.1	XP_002147525.1	PMAA_080320	102.m008115	WSC domain protein, putative
7025164	XM_002147490.1	XP_002147526.1	PMAA_080330	102.m008116	phosphatidylserine synthase
7025165	XM_002147491.1	XP_002147527.1	PMAA_080340	102.m008117	snoRNP protein (gar1), putative
7025166	XM_002147492.1	XP_002147528.1	PMAA_080350	102.m008118	threonyl-tRNA synthetase, putative
7025167	XM_002147493.1	XP_002147529.1	PMAA_080360	102.m008119	C2H2 finger domain protein, putative
7025168	XM_002147494.1	XP_002147530.1	PMAA_080370	102.m008120	formate/nitrite transporter family protein, putative
7025169	XM_002147495.1	XP_002147531.1	PMAA_080380	102.m008121	conserved hypothetical protein
7025170	XM_002147496.1	XP_002147532.1	PMAA_080390	102.m008122	C6 transcription factor, putative
7025171	XM_002147497.1	XP_002147533.1	PMAA_080400	102.m008123	gamma-glutamyltranspeptidase
7025172	XM_002147498.1	XP_002147534.1	PMAA_080410	102.m008124	conserved hypothetical protein
7025173	XM_002147499.1	XP_002147535.1	PMAA_080420	102.m008125	MFS multidrug resistance transporter, putative
7025174	XM_002147500.1	XP_002147536.1	PMAA_080430	102.m008126	thiol methyltransferase, putative
7025175	XM_002147501.1	XP_002147537.1	PMAA_080440	102.m008127	OTU-like cysteine protease, putative
7025176	XM_002147502.1	XP_002147538.1	PMAA_080450	102.m008128	short chain dehydrogenase/reductase family
7025177	XM_002147503.1	XP_002147539.1	PMAA_080460	102.m008129	alpha,alpha-trehalase TreB/Nth1
7025178	XM_002147504.1	XP_002147540.1	PMAA_080470	102.m008130	isocitrate lyase AcuD
7025179	XM_002147505.1	XP_002147541.1	PMAA_080480	102.m008131	hypothetical protein
7025180	XM_002147506.1	XP_002147542.1	PMAA_080490	102.m008133	conserved hypothetical protein
7025181	XM_002147507.1	XP_002147543.1	PMAA_080500	102.m008134	fumarylacetoacetate hydrolase, putative
7025182	XM_002147508.1	XP_002147544.1	PMAA_080510	102.m008135	homogentisate 1,2-dioxygenase, putative
7025183	XM_002147509.1	XP_002147545.1	PMAA_080520	102.m008136	aldehyde dehydrogenase, putative
7025184	XM_002147510.1	XP_002147546.1	PMAA_080530	102.m008137	AP-3 adaptor complex subunit mu, putative
7025185	XM_002147511.1	XP_002147547.1	PMAA_080540	102.m008138	conserved hypothetical protein
7025186	XM_002147512.1	XP_002147548.1	PMAA_080550	102.m008139	conserved hypothetical protein
7025187	XM_002147513.1	XP_002147549.1	PMAA_080560	102.m008140	SNF2 family helicase/ATPase, putative
7025188	XM_002147514.1	XP_002147550.1	PMAA_080570	102.m008141	ankyrin repeat-cotaining protein, putative
7025189	XM_002147515.1	XP_002147551.1	PMAA_080580	102.m008142	hypothetical protein
7025190	XM_002147516.1	XP_002147552.1	PMAA_080590	102.m008143	aspartic endopeptidase (AP1), putative
7025191	XM_002147517.1	XP_002147553.1	PMAA_080600	102.m008144	RNA methyltransferase, TrmH family family
7025192	XM_002147518.1	XP_002147554.1	PMAA_080610	102.m008145	chromatin remodeling complex subunit (Chd3), putative
7025193	XM_002147519.1	XP_002147555.1	PMAA_080620	102.m008146	conserved hypothetical protein
7025194	XM_002147520.1	XP_002147556.1	PMAA_080630	102.m008147	37S ribosomal protein Rsm24, putative
7025195	XM_002147521.1	XP_002147557.1	PMAA_080640	102.m008148	glycosyltransferase family 28, putative
7025196	XM_002147522.1	XP_002147558.1	PMAA_080650	102.m008149	actin-related protein ArpA
7025197	XM_002147523.1	XP_002147559.1	PMAA_080660	102.m008150	N-acetyltransferase, GNAT family, putative
7025198	XM_002147524.1	XP_002147560.1	PMAA_080670	102.m008151	3-hydroxyacyl-CoA dehyrogenase, putative
7025199	XM_002147525.1	XP_002147561.1	PMAA_080680	102.m008152	zinc knuckle transcription factor (CnjB), putative
7025200	XM_002147526.1	XP_002147562.1	PMAA_080690	102.m008153	MFS monosaccharide transporter, putative
7025201	XM_002147527.1	XP_002147563.1	PMAA_080700	102.m008154	glutamine synthetase
7025202	XM_002147528.1	XP_002147564.1	PMAA_080710	102.m008155	conserved hypothetical protein
7025203	XM_002147529.1	XP_002147565.1	PMAA_080720	102.m008156	conserved hypothetical protein
7025203	XM_002147530.1	XP_002147566.1	PMAA_080720	102.m008156	conserved hypothetical protein
7025203	XM_002147531.1	XP_002147567.1	PMAA_080720	102.m008156	conserved hypothetical protein
7025203	XM_002147532.1	XP_002147568.1	PMAA_080720	102.m008156	conserved hypothetical protein
7025204	XM_002147533.1	XP_002147569.1	PMAA_080730	102.m008157	conserved hypothetical protein
7025205	XM_002147534.1	XP_002147570.1	PMAA_080740	102.m008158	conserved hypothetical protein
7025206	XM_002147535.1	XP_002147571.1	PMAA_080750	102.m008159	SNARE domain protein
7025207	XM_002147536.1	XP_002147572.1	PMAA_080760	102.m008160	NAP family protein
7025208	XM_002147537.1	XP_002147573.1	PMAA_080770	102.m008161	lysophospholipase, putative
7025209	XM_002147538.1	XP_002147574.1	PMAA_080780	102.m008162	nitrogen metabolite repression regulator NmrA
7025210	XM_002147539.1	XP_002147575.1	PMAA_080790	102.m008163	conserved hypothetical protein
7025211	XM_002147540.1	XP_002147576.1	PMAA_080800	102.m008164	potassium channel beta, putative
7025212	XM_002147541.1	XP_002147577.1	PMAA_080810	102.m008165	AMID-like mitochondrial oxidoreductase, putative
7025213	XM_002147542.1	XP_002147578.1	PMAA_080820	102.m008166	amino acid permease, putative
7025214	XM_002147543.1	XP_002147579.1	PMAA_080830	102.m008167	short chain dehydrogenase/reductase family protein
7025215	XM_002147544.1	XP_002147580.1	PMAA_080840	102.m008168	conserved hypothetical protein
7025216	XM_002147545.1	XP_002147581.1	PMAA_080850	102.m008169	conserved hypothetical protein
7025217	XM_002147546.1	XP_002147582.1	PMAA_080860	102.m008170	conserved hypothetical protein
7025218	XM_002147547.1	XP_002147583.1	PMAA_080870	102.m008171	nicotinamide nucleotide transhydrogenase, putative
7025219	XM_002147548.1	XP_002147584.1	PMAA_080880	102.m008172	conserved hypothetical protein
7025220	XM_002147549.1	XP_002147585.1	PMAA_080890	102.m008173	fatty acid elongase (Gns1), putative
7025221	XM_002147550.1	XP_002147586.1	PMAA_080900	102.m008174	cytochrome c oxidase subunit Va, putative
7025222	XM_002147551.1	XP_002147587.1	PMAA_080910	102.m008175	alpha-1,2-mannosyltransferase (Ktr4), putative
7025223	XM_002147552.1	XP_002147588.1	PMAA_080920	102.m008176	gamma-tubulin complex component GCP5, putative
7025224	XM_002147553.1	XP_002147589.1	PMAA_080930	102.m008177	phosphoribosylformylglycinamidine synthase
7025225	XM_002147554.1	XP_002147590.1	PMAA_080940	102.m008178	MFS multidrug transporter, putative
7025226	XM_002147555.1	XP_002147591.1	PMAA_080950	102.m008179	C6 transcription factor, putative
7025226	XM_002147556.1	XP_002147592.1	PMAA_080950	102.m008179	C6 transcription factor, putative
7025227	XM_002147557.1	XP_002147593.1	PMAA_080960	102.m008180	20S cyclosome subunit (Cut9/Cdc16), putative
7025228	XM_002147558.1	XP_002147594.1	PMAA_080970	102.m008181	mRNA splicing protein Yju2
7025228	XM_002147559.1	XP_002147595.1	PMAA_080970	102.m008181	mRNA splicing protein Yju2
7025229	XM_002147560.1	XP_002147596.1	PMAA_080980	102.m008182	histone acetylase complex subunit Paf400, putative
7025230	XM_002147561.1	XP_002147597.1	PMAA_080990	102.m008183	vesicular fusion ATPase, putative
7025231	XM_002147562.1	XP_002147598.1	PMAA_081000	102.m008184	protein phosphatase regulatory subunit (Ssc1), putative
7025232	XM_002147563.1	XP_002147599.1	PMAA_081010	102.m008185	RNA polymerase III transcription factor subunit, putative
7025233	XM_002147564.1	XP_002147600.1	PMAA_081020	102.m008186	conserved hypothetical protein
7025234	XM_002147565.1	XP_002147601.1	PMAA_081030	102.m008187	ribokinase
7025235	XM_002147566.1	XP_002147602.1	PMAA_081040	102.m008188	DNA replication licensing factor Mcm5, putative
7025236	XM_002147567.1	XP_002147603.1	PMAA_081050	102.m008189	GARP complex component (Vps54), putative
7025237	XM_002147568.1	XP_002147604.1	PMAA_081060	102.m008190	conserved hypothetical protein
7025238	XM_002147569.1	XP_002147605.1	PMAA_081070	102.m008191	glycogen synthase Gsy1, putative
7025239	XM_002147570.1	XP_002147606.1	PMAA_081080	102.m008192	zinc-binding oxidoreductase, putative
7025240	XM_002147571.1	XP_002147607.1	PMAA_081090	102.m008193	farnesyl-pyrophosphate synthetase
[truncated: 8,754 more rows]

## Sheet: Phase-specific 401 genes (2)
Table S2. Relative expression data for the three cell states.
Microarray ID	P. marneffei Gene Model ID	Percentage of total expession
		Hyphal	Asexual	Yeast
DC_010A17	PMAA_086380	52	23	25
DC_010A8	PMAA_073270	53	25	22
DC_010B21	PMAA_089910	24	49	26
DC_010C14	PMAA_072760	29	15	55
DC_010C15	PMAA_065470	13	25	62
DC_010C19	PMAA_066510	22	30	48
DC_010C23	PMAA_042510	45	22	33
DC_010D11	PMAA_041190	63	24	12
DC_010D5	PMAA_010130	47	32	21
DC_010D7	PMAA_005360	47	19	35
DC_010E21	PMAA_093910	57	20	23
DC_010E4	PMAA_099880	47	20	33
DC_010E6	PMAA_096380	47	30	23
DC_010F17	PMAA_055990	57	22	20
DC_010F2	PMAA_084300	46	16	38
DC_010F9	PMAA_037440	44	19	38
DC_010G15	PMAA_021000	37	42	21
DC_010I23	PMAA_021140	46	23	32
DC_010L19	PMAA_049350	40	20	41
DC_010O2	PMAA_011520	25	31	44
DC_011A14	PMAA_005610	25	23	52
DC_011A15	PMAA_081090	58	22	20
DC_011A5	PMAA_066580	31	20	49
DC_011C4	PMAA_080010	20	29	51
DC_011C5	PMAA_018330	40	21	39
DC_011C7	PMAA_101530	7	79	14
DC_011C8	PMAA_100160	20	48	32
DC_011D23	PMAA_023300	44	30	27
DC_011D7	PMAA_087990	21	29	50
DC_011D8	PMAA_091290	10	40	50
DC_011E22	PMAA_031420	56	22	22
DC_011E5	PMAA_084280	52	8	40
DC_011F10	PMAA_014380	38	44	19
DC_011F9	PMAA_096670	16	56	29
DC_011G17	PMAA_059830	62	16	22
DC_011G18	PMAA_078410	42	33	24
DC_011G2	PMAA_019010	20	54	26
DC_011G24	PMAA_102310	19	36	45
DC_011G7	PMAA_069820	64	9	27
DC_011H15	PMAA_081680	24	54	22
DC_011H17	PMAA_017780	47	30	23
DC_011J22	PMAA_071690	54	19	27
DC_011J24	PMAA_092770	67	13	20
DC_011K9	PMAA_039540	46	24	30
DC_011L15	PMAA_068140	62	23	15
DC_011L4	PMAA_028880	64	16	20
DC_011N22	PMAA_045180	22	33	45
DC_011N5	PMAA_031950	4	7	89
DC_011N6	PMAA_033630	21	29	50
DC_011N8	PMAA_094650	52	19	28
DC_011O16	PMAA_054400	17	40	43
DC_011P1	PMAA_081560	12	25	63
DC_011P22	PMAA_084830	43	22	35
DC_011P6	PMAA_001740	51	25	24
DC_012B15	PMAA_065680	82	6	12
DC_012C10	PMAA_049950	52	23	25
DC_012C4	PMAA_079980	56	23	21
DC_012D7	PMAA_056120	15	71	14
DC_012F1	PMAA_017640	36	19	45
DC_012F12	PMAA_041760	11	52	37
DC_012F22	PMAA_015980	48	19	33
DC_012F3	PMAA_095250	8	59	34
DC_012F4	PMAA_039640	57	22	21
DC_012F5	PMAA_025880	22	34	44
DC_012G1	PMAA_094610	50	20	30
DC_012I5	PMAA_030170	47	21	32
DC_012J1	PMAA_035110	41	17	42
DC_012J17	PMAA_028330	51	22	27
DC_012J23	PMAA_011350	90	4	6
DC_012J23	PMAA_069010	90	4	6
DC_012J5	PMAA_092640	13	29	58
DC_012L10	PMAA_091660	50	23	27
DC_012L9	PMAA_025670	20	58	22
DC_012N2	PMAA_092720	72	8	20
DC_012P15	PMAA_059640	22	56	23
DC_012P22	PMAA_090390	12	22	66
DC_013A12	PMAA_101020	20	48	33
DC_013A18	PMAA_008220	16	47	38
DC_013A20	PMAA_082030	2	96	2
DC_013A22	PMAA_064600	54	21	25
DC_013A23	PMAA_064990	11	78	11
DC_013A6	PMAA_020890	13	73	14
DC_013B24	PMAA_002470	57	26	16
DC_013C23	PMAA_064620	56	8	36
DC_013D11	PMAA_019260	40	37	24
DC_013D24	PMAA_093380	44	40	17
DC_013D8	PMAA_040230	46	30	25
DC_013E17	PMAA_049550	21	60	19
DC_013E19	PMAA_082040	3	94	3
DC_013F12	PMAA_004750	19	30	51
DC_013F16	PMAA_080670	41	35	25
DC_013F21	PMAA_009130	44	22	34
DC_013F5	PMAA_063480	11	53	36
DC_013G1	PMAA_092900	45	19	36
DC_013G16	PMAA_054200	38	41	22
DC_013G3	PMAA_062740	32	47	21
DC_013G8	PMAA_006080	30	50	20
DC_013G9	PMAA_066120	67	13	20
DC_013H16	PMAA_046930	23	25	53
DC_013I21	PMAA_098380	68	13	19
DC_013I8	PMAA_017080	26	15	58
DC_013K11	PMAA_063100	4	93	3
DC_013K17	PMAA_079130	19	38	43
DC_013K4	PMAA_080130	25	53	22
DC_013O1	PMAA_063790	56	21	23
DC_013O16	PMAA_005510	54	32	14
DC_013O9	PMAA_071760	78	9	13
DC_014C18	PMAA_041270	39	17	44
DC_014C20	PMAA_037620	18	19	63
DC_014E18	PMAA_057320	47	19	34
DC_014L11	PMAA_006650	43	35	22
DC_014L14	PMAA_040640	44	17	39
DC_014N20	PMAA_042280	53	21	26
DC_014N7	PMAA_002910	13	37	50
DC_014O12	PMAA_055540	48	26	27
DC_014O24	PMAA_094890	11	31	59
DC_01A15	PMAA_007900	22	47	31
DC_01A6	PMAA_024740	67	22	12
DC_01B9	PMAA_078310	18	18	65
DC_01C6	PMAA_038320	39	11	51
DC_01E15	PMAA_075300	3	91	7
DC_01E18	PMAA_021910	21	46	33
DC_01F15	PMAA_066040	15	66	19
DC_01F4	PMAA_071070	46	22	32
DC_01F6	PMAA_029990	24	51	24
DC_01G18	PMAA_009820	4	13	83
DC_01G4	PMAA_028140	46	26	29
DC_01H11	PMAA_024900	65	16	19
DC_01H15	PMAA_050700	46	27	26
DC_01H18	PMAA_088690	86	5	9
DC_01H9	PMAA_001470	27	60	13
DC_01I1	PMAA_035040	17	14	69
DC_01J3	PMAA_075640	19	58	23
DC_01K11	PMAA_017430	29	21	50
DC_01K6	PMAA_055410	80	5	14
DC_01L15	PMAA_010280	58	15	27
DC_01L19	PMAA_076310	48	27	24
DC_01L20	PMAA_091940	45	17	37
DC_01M20	PMAA_073320	63	16	21
DC_01N14	PMAA_079710	16	55	29
DC_01N15	PMAA_013650	17	28	55
DC_01N19	PMAA_052600	57	23	20
DC_01N4	PMAA_047990	16	34	50
DC_01O18	PMAA_015360	8	41	51
DC_01P15	PMAA_036400	30	48	22
DC_02A1	PMAA_016130	14	29	57
DC_02A5	PMAA_041990	47	30	23
DC_02A9	PMAA_045900	12	77	11
DC_02B12	PMAA_007740	20	60	20
DC_02B16	PMAA_060200	21	49	29
DC_02B4	PMAA_028110	22	17	61
DC_02B4	PMAA_028110	22	17	61
DC_02C18	PMAA_022690	19	62	19
DC_02C22	PMAA_038970	20	33	47
DC_02C6	PMAA_075980	39	9	52
DC_02D1	PMAA_076130	77	13	11
DC_02D12	PMAA_091380	21	56	24
DC_02D18	PMAA_046420	71	15	14
DC_02D21	PMAA_097060	17	28	55
DC_02D23	PMAA_081600	50	35	15
DC_02D24	PMAA_055980	17	49	33
DC_02E12	PMAA_021280	41	7	52
DC_02E16	PMAA_091310	3	4	94
DC_02E21	PMAA_070380	50	37	13
DC_02F17	PMAA_034920	19	66	15
DC_02F18	PMAA_035660	13	49	37
DC_02F2	PMAA_086150	10	81	9
DC_02F21	PMAA_080980	79	14	7
DC_02G15	PMAA_045960	40	51	9
DC_02H24	PMAA_052210	77	9	14
DC_02H3	PMAA_013400	48	23	29
DC_02I2	PMAA_082620	10	80	10
DC_02I20	PMAA_029890	53	23	23
DC_02I7	PMAA_084230	23	46	31
DC_02J17	PMAA_095560	10	80	10
DC_02J21	PMAA_053000	26	28	46
DC_02J22	PMAA_047000	12	78	10
DC_02L15	PMAA_076660	22	31	47
DC_02L17	PMAA_029640	47	29	24
DC_02L9	PMAA_054370	38	43	20
DC_02N8	PMAA_035770	22	41	36
DC_02O7	PMAA_040020	61	15	24
DC_02P17	PMAA_040090	29	16	55
DC_02P2	PMAA_023440	22	53	25
DC_03A17	PMAA_059560	35	51	15
DC_03B24	PMAA_054650	25	55	20
DC_03B5	PMAA_015960	47	41	12
DC_03B7	PMAA_065120	36	42	22
DC_03C24	PMAA_076680	21	55	24
DC_03C3	PMAA_036120	13	34	53
DC_03D5	PMAA_028730	24	6	69
DC_03D9	PMAA_004490	33	11	56
DC_03E8	PMAA_093480	44	17	38
DC_03F11	PMAA_060900	53	22	25
DC_03F21	PMAA_094330	10	26	64
DC_03F23	PMAA_035470	48	26	26
DC_03F6	PMAA_042130	28	52	20
DC_03G11	PMAA_045600	14	75	11
DC_03G14	PMAA_027300	29	51	20
DC_03G24	PMAA_004760	44	35	22
DC_03G4	PMAA_041520	44	15	41
DC_03G9	PMAA_017720	46	33	21
DC_03H4	PMAA_020080	51	17	32
DC_03I2	PMAA_020160	49	22	30
DC_03I4	PMAA_003920	47	26	27
DC_03I7	PMAA_093350	68	22	11
DC_03J11	PMAA_066300	10	78	12
DC_03J20	PMAA_071630	56	20	24
DC_03K10	PMAA_027290	4	59	37
DC_03K12	PMAA_065540	59	20	20
DC_03K16	PMAA_102470	20	36	44
DC_03K2	PMAA_041840	21	59	19
DC_03K21	PMAA_078940	6	11	83
DC_03L15	PMAA_012920	77	8	15
DC_03L19	PMAA_065440	52	17	31
DC_03N2	PMAA_098430	44	35	21
DC_03N22	PMAA_080350	51	29	21
DC_03O13	PMAA_041320	16	67	17
DC_03O14	PMAA_054240	44	40	15
DC_03O2	PMAA_032300	70	10	20
DC_03O8	PMAA_004050	13	18	69
DC_03P21	PMAA_006690	21	56	23
DC_03P3	PMAA_007760	24	31	45
DC_04E10	PMAA_076380	22	46	32
DC_04F22	PMAA_009150	52	24	24
DC_04G10	PMAA_095670	12	77	12
DC_04G13	PMAA_070190	43	38	19
DC_04H10	PMAA_049040	17	66	17
DC_04I6	PMAA_060150	26	49	26
DC_04K22	PMAA_078420	49	29	22
DC_04N2	PMAA_040300	2	14	84
DC_04O10	PMAA_100150	7	20	74
DC_04O14	PMAA_070510	23	32	45
DC_04O20	PMAA_043060	53	22	26
DC_05A13	PMAA_000780	24	34	42
DC_05A17	PMAA_089000	50	25	25
DC_05A3	PMAA_018640	1	3	96
DC_05A7	PMAA_084700	28	25	46
DC_05B15	PMAA_039810	48	19	34
DC_05B4	PMAA_039850	49	36	15
DC_05B7	PMAA_032350	53	5	42
DC_05C15	PMAA_057640	9	81	10
DC_05C3	PMAA_053710	87	7	6
DC_05C7	PMAA_002930	12	54	34
DC_05D1	PMAA_059270	29	50	22
DC_05D13	PMAA_087420	49	26	24
DC_05E18	PMAA_100870	13	74	13
DC_05E21	PMAA_036000	55	17	27
DC_05E24	PMAA_075860	23	47	30
DC_05E5	PMAA_025700	4	92	3
DC_05F10	PMAA_008200	18	46	36
DC_05F19	PMAA_080560	36	15	49
DC_05F21	PMAA_073640	33	55	12
DC_05F22	PMAA_040210	31	53	15
DC_05F9	PMAA_075990	14	11	75
DC_05G4	PMAA_051480	2	37	61
DC_05G6	PMAA_053530	19	37	44
DC_05H4	PMAA_057450	6	4	90
DC_05H7	PMAA_020770	27	20	53
DC_05I13	PMAA_024520	13	16	72
DC_05I15	PMAA_041330	44	23	32
DC_05I19	PMAA_039120	12	78	10
DC_05I21	PMAA_005580	24	17	58
DC_05J1	PMAA_039930	61	19	20
DC_05J2	PMAA_090730	38	21	41
DC_05J6	PMAA_062210	23	43	34
DC_05K12	PMAA_058480	17	70	14
DC_05K15	PMAA_021820	20	62	18
DC_05K17	PMAA_071450	74	19	7
DC_05K6	PMAA_102650	25	22	53
DC_05L2	PMAA_084450	20	62	18
DC_05L23	PMAA_077810	46	29	25
DC_05N16	PMAA_022080	29	23	48
DC_05N4	PMAA_077060	8	80	12
DC_05O10	PMAA_057560	73	6	20
DC_05O11	PMAA_044710	34	21	44
DC_05O13	PMAA_010220	2	94	3
DC_05O15	PMAA_040890	21	28	52
DC_05O24	PMAA_082600	16	33	51
DC_05O9	PMAA_019030	41	17	42
DC_05P11	PMAA_065580	28	7	64
DC_05P19	PMAA_066490	12	20	68
DC_06A2	PMAA_084740	53	18	29
DC_06A22	PMAA_057360	39	43	18
DC_06B23	PMAA_038990	67	18	16
DC_06B24	PMAA_041170	44	31	25
DC_06C16	PMAA_074840	21	29	50
DC_06C17	PMAA_024760	32	8	61
DC_06C20	PMAA_089220	59	14	27
DC_06C23	PMAA_052080	58	22	20
DC_06D19	PMAA_070290	44	33	23
DC_06D21	PMAA_063000	29	27	44
DC_06E11	PMAA_013020	59	29	12
DC_06E16	PMAA_078660	22	59	19
DC_06E2	PMAA_092050	47	23	30
DC_06F11	PMAA_044270	55	30	15
DC_06F12	PMAA_006540	24	33	43
DC_06F16	PMAA_020560	9	81	10
DC_06F24	PMAA_101620	17	63	20
DC_06G14	PMAA_067490	53	21	26
DC_06G15	PMAA_030620	48	23	29
DC_06G18	PMAA_092380	11	28	61
DC_06G20	PMAA_037600	53	28	19
DC_06G8	PMAA_091840	65	16	18
DC_06H1	PMAA_066500	26	25	49
DC_06H22	PMAA_088670	24	21	55
DC_06I16	PMAA_050290	14	49	36
DC_06J11	PMAA_036890	23	39	38
DC_06J24	PMAA_097290	6	89	6
DC_06K12	PMAA_005310	51	26	23
DC_06K13	PMAA_082670	47	29	24
DC_06K2	PMAA_049510	4	89	7
DC_06K21	PMAA_040470	7	19	74
DC_06L1	PMAA_041070	24	22	54
DC_06L14	PMAA_041410	40	48	12
DC_06N15	PMAA_058210	21	40	39
DC_06N19	PMAA_044650	20	11	70
DC_06N7	PMAA_035260	29	15	56
DC_06O22	PMAA_022840	37	48	14
DC_06O3	PMAA_015260	27	25	48
DC_06O4	PMAA_016000	32	21	47
DC_06P22	PMAA_045500	46	20	35
DC_06P3	PMAA_019390	52	24	24
DC_07A24	PMAA_039450	24	21	56
DC_07B18	PMAA_028120	25	23	52
DC_07B22	PMAA_085430	59	12	29
DC_07C14	PMAA_065590	31	13	56
DC_07D12	PMAA_053860	54	23	23
DC_07D22	PMAA_071490	9	17	74
DC_07E14	PMAA_075290	21	59	20
DC_07E21	PMAA_011150	82	4	14
DC_07F14	PMAA_059370	9	81	10
DC_07F23	PMAA_019770	23	37	40
DC_07G10	PMAA_099540	28	51	21
DC_07I22	PMAA_069900	61	12	27
DC_07I3	PMAA_091960	36	40	24
DC_07I9	PMAA_007590	15	18	68
DC_07K18	PMAA_093920	18	30	52
DC_07K21	PMAA_096820	62	25	13
DC_07K3	PMAA_015910	48	26	26
DC_07K4	PMAA_017130	21	30	49
DC_07L20	PMAA_031980	14	16	70
DC_07M14	PMAA_071020	47	30	23
DC_07M5	PMAA_010380	36	62	3
DC_07M7	PMAA_032450	41	46	13
DC_07N4	PMAA_056390	71	19	10
DC_07N6	PMAA_000930	21	39	40
DC_07O19	PMAA_040700	20	18	62
DC_07O20	PMAA_086650	49	18	33
DC_07P18	PMAA_021380	19	17	64
DC_08B12	PMAA_074240	26	11	63
DC_08D11	PMAA_040500	23	45	32
DC_08E17	PMAA_082150	46	21	33
DC_08E4	PMAA_083630	50	15	35
DC_08F11	PMAA_051100	24	51	25
DC_08F12	PMAA_054570	45	12	43
DC_08F21	PMAA_047890	15	56	29
DC_08F22	PMAA_054360	60	18	23
DC_08F3	PMAA_072140	55	17	29
DC_08H20	PMAA_014440	50	15	35
DC_08H3	PMAA_015680	50	9	41
DC_08H9	PMAA_007780	20	41	39
DC_08I13	PMAA_032960	55	20	25
DC_08J15	PMAA_096860	17	71	12
DC_08J24	PMAA_102280	20	36	44
DC_08J5	PMAA_017210	20	43	37
DC_08K10	PMAA_081450	56	22	22
DC_08K11	PMAA_093360	45	31	24
DC_08L17	PMAA_079340	22	23	55
DC_08L22	PMAA_037580	25	25	50
DC_08L5	PMAA_051360	49	26	25
DC_08N15	PMAA_008830	20	28	52
DC_08N9	PMAA_058900	15	7	77
DC_08O12	PMAA_074300	17	45	38
DC_08O19	PMAA_012160	19	62	19
DC_08O2	PMAA_068520	74	14	12
DC_08O22	PMAA_059970	13	71	15
DC_08P15	PMAA_020600	16	20	64
DC_08P2	PMAA_041380	42	21	37
DC_08P22	PMAA_060070	50	34	16
DC_08P7	PMAA_002420	31	14	55
DC_09A21	PMAA_019810	45	11	43
DC_09A24	PMAA_058520	18	24	58
DC_09A9	PMAA_016400	5	88	7
DC_09B14	PMAA_085050	50	24	26
DC_09B15	PMAA_091910	2	9	88
DC_09C12	PMAA_040070	49	20	32
DC_09C4	PMAA_048230	73	10	16
DC_09C6	PMAA_042070	22	49	29
DC_09E10	PMAA_028700	53	24	23
DC_09F21	PMAA_084770	34	22	45
DC_09F23	PMAA_035220	52	21	28
DC_09F6	PMAA_060250	62	25	13
DC_09G16	PMAA_099830	59	20	21
DC_09H19	PMAA_065170	55	25	20
DC_09I15	PMAA_043430	21	21	58
DC_09I2	PMAA_083730	48	27	25
DC_09I23	PMAA_085020	46	24	30
DC_09L16	PMAA_018570	56	26	19
DC_09N20	PMAA_068430	40	39	21
DC_09O16	PMAA_028960	48	28	25
