# Supplementary material for: Cell-Type–Specific Transcriptional Profiles of the Dimorphic Pathogen Penicillium marneffei Reflect Distinct Reproductive, Morphological, and Environmental Demands
Source: G3 (Bethesda). 2013 Nov 1;3(11):1997–2014. doi: 10.1534/g3.113.006809 (PMC3815061; doi:10.1534/g3.113.006809)
Supplement: Supporting Information [file supp_g3.113.006809_TableS4.xls]

## Sheet: 6 Phase-specific clusters
Table S4. MeV phase-specific curated clusters.
Cluster 1		Cluster 2		Cluster 3			Cluster 4		Cluster 5		Cluster 6
PMAA ID	Function	PMAA ID	Function	PMAA ID	Function		PMAA ID	Function	PMAA ID	Function	PMAA ID	Function
PMAA_005310	conserved hypothetical protein	PMAA_002470	kinesin, putative	PMAA_095250	EF hand domain protein		PMAA_015980	salicylate hydroxylase	PMAA_041410	aminotransferase, classes I and II	PMAA_002420	conserved hypothetical protein
PMAA_009150	CCCH zinc finger protein	PMAA_004760	vacuolar H+\/Ca2+ exchanger	PMAA_042130	G2/M-specific cyclin NimE		PMAA_035110	hypothetical protein PMAA_035110	PMAA_054370	conserved hypothetical protein	PMAA_004750	sugar transporter
PMAA_011150	hexose carrier protein	PMAA_005510	snoRNA binding protein	PMAA_075290	MFS multidrug transporter		PMAA_045500	pheromone processing carboxypeptidase KexA	PMAA_057360	conserved hypothetical protein	PMAA_007760	hypothetical protein PMAA_007760
PMAA_015910	endothelin-converting enzyme	PMAA_006650	6-phosphofructokinase alpha subunit	PMAA_029990	conserved hypothetical protein		PMAA_054570	exocyst complex component Sec3	PMAA_073640	C6 transcription factor	PMAA_017080	conserved hypothetical protein
PMAA_031420	conserved hypothetical protein	PMAA_010130	calcium/calmodulin-dependent protein kinase	PMAA_045900	hypothetical protein PMAA_045900		PMAA_005360	C2H2 finger domain protein	PMAA_010380	GTP-binding protein EsdC	PMAA_017430	beta-glucosidase, putative
PMAA_032300	cytochrome C oxidase assembly protein cox15	PMAA_013020	RNA binding protein Ligatin/Tma64	PMAA_100160	hypothetical protein PMAA_100160		PMAA_009130	COP9 signalosome subunit CsnD	PMAA_014380	Golgi transport protein Sly1	PMAA_020600	hemolysin-III channel protein Izh2
PMAA_049950	hypothetical protein PMAA_049950	PMAA_017720	copper homeostasis protein	PMAA_091380	3-oxoacyl-[acyl-carrier-protein synthase		PMAA_014440	conserved hypothetical protein	PMAA_015960	O-methyltransferase	PMAA_021380	conserved hypothetical protein
PMAA_066120	C6 transcription factor RosA-like	PMAA_017780	alkanesulfonate monooxygenase	PMAA_021910	AP-1 adaptor complex subunit sigma		PMAA_015680	biotin synthase, putative	PMAA_019260	ARID/BRIGHT domain protein (SWI1)	PMAA_028110	translation initiation regulator (Gcn20)
PMAA_067490	Arp2/3 complex subunit (Arp2)	PMAA_018570	allergen Asp F3	PMAA_041840	ATP binding protein		PMAA_018330	H-ATPase_c domain protein	PMAA_021000	trehalose synthase (Ccg-9)	PMAA_028120	conserved hypothetical protein
PMAA_076130	meiosis induction protein kinase (IME2)	PMAA_023300	mitochondrial protein Fmp25	PMAA_035660	ATP citrate lyase, subunit 1		PMAA_019030	phosphatidylserine decarboxylase Psd2	PMAA_022840	conserved hypothetical protein	PMAA_028730	NAD+ dependent glutamate dehydrogenase
PMAA_085020	sulfur metabolism regulator SkpA	PMAA_024740	conserved hypothetical protein	PMAA_055980	ATPase inhibitor, mitochondrial precursor		PMAA_019810	stomatin family protein	PMAA_032450	conserved hypothetical protein	PMAA_037620	conserved hypothetical protein
PMAA_094650	conserved hypothetical protein	PMAA_028960	riboflavin kinase, putative	PMAA_025670	C2H2 transcription factor		PMAA_032350	phosphoenolpyruvate carboxykinase AcuF	PMAA_040210	GATA transcription factor LreB	PMAA_039450	deoxyhypusine synthase
PMAA_069010	copper amine oxidase	PMAA_029640	proline iminopeptidase	PMAA_075300	C2H2 type conidiation transcription factor BrlA		PMAA_037440	ribosome biogenesis ABC transporter Arb1	PMAA_045960	conserved hypothetical protein	PMAA_040470	antigenic cell wall galactomannoprotein
PMAA_001740	conserved hypothetical protein	PMAA_037600	Rho guanyl nucleotide exchange factor	PMAA_047890	C6 finger domain protein		PMAA_039810	ubiquitin hydrolase CreB	PMAA_054200	Sin3 complex subunit (Stb2)	PMAA_045180	exosome complex exonuclease Rrp40
PMAA_003920	hypothetical protein PMAA_003920	PMAA_039850	hypothetical protein PMAA_039850	PMAA_040500	CSL family zinc fnger-containing protein		PMAA_040640	iron-sulfur cluster assembly accessory protein Isa1	PMAA_059560	conserved hypothetical protein	PMAA_051480	conserved hypothetical protein
PMAA_011350	exocyst complex component Sec15	PMAA_040230	phosphoribosyl-aminoimidazole carboxylase	PMAA_007900	DNA helicase recq, putative		PMAA_041270	vacuolar ATPase 98 kDa subunit	PMAA_062740	conserved hypothetical protein	PMAA_063000	zinc alcohol dehydrogenase
PMAA_012920	isocitrate dehydrogenase Idp1	PMAA_041170	proteasome activator subunit 4	PMAA_042070	DNA repair protein (Rad1)		PMAA_041380	involucrin repeat protein	PMAA_065120	conserved hypothetical protein	PMAA_065580	2-deoxy-D-gluconate 3-dehydrogenase
PMAA_013400	pheromone maturation dipeptidyl aminopeptidase DapB	PMAA_041190	conserved hypothetical protein	PMAA_059270	MFS alpha-glucoside transporter		PMAA_041520	vacuolar protein sorting-associated protein vps13	PMAA_068430	sexual development activator VeA	PMAA_074840	conserved hypothetical protein
PMAA_019390	ribonuclease p/mrp subunit	PMAA_041990	anthranilate phosphorbosyltransferase	PMAA_049040	MFS monosaccharide transporter		PMAA_042510	vacuolar ATP synthase subunit c	PMAA_070190	Ras small monomeric GTPase RasB	PMAA_078310	CRAL/TRIO domain protein
PMAA_020160	electron transfer flavoprotein-ubiquinone oxidoreductase	PMAA_044270	C2H2 transcription factor	PMAA_100870	Na+/H+ antiporter, putative		PMAA_049350	C2H2 transcription factor (Crea)	PMAA_091960	small nuclear ribonucleoprotein (LSM1)	PMAA_078940	cell wall glucanase
PMAA_024900	mitochondrial ADP/ATP carrier protein (Ant)	PMAA_056390	C2H2 transcription factor (Seb1)	PMAA_080130	PH domain protein		PMAA_057320	TBC domain protein	PMAA_093380	C6 finger domain protein	PMAA_079130	conserved hypothetical protein
PMAA_028140	conserved hypothetical protein	PMAA_060070	60S acidic ribosomal protein, P2/allergen Asp F B, mRNA	PMAA_063480	Rho guanyl nucleotide exchange factor		PMAA_064620	2-oxoisovalerate dehydrogenase complex alpha subunit	PMAA_054240	ribosomal L18ae protein family	PMAA_094330	cation chloride cotransporter
PMAA_028330	NADH-ubiquinone oxidoreductase subunit B	PMAA_060250	AAA family ATPase	PMAA_075860	Sin3-associated polypeptide Sap18		PMAA_082150	PHD transcription factor (Rum1)			PMAA_000780	hypothetical protein PMAA_000780
PMAA_028700	actin cortical patch component	PMAA_065170	conserved hypothetical protein	PMAA_022690	aldehyde reductase (GliO)		PMAA_083630	calcineurin catalytic subunit CnaA			PMAA_002910	acetyltransferase SidF
PMAA_028880	hexokinase Kxk, putative, mRNA	PMAA_068140	isocitrate dehydrogenase, NAD-dependent	PMAA_059370	alpha-N-acetylglucosaminidase		PMAA_084280	conserved hypothetical protein			PMAA_004050	conserved hypothetical protein
PMAA_029890	assimilatory sulfite reductase	PMAA_070290	APSES transcription factor StuA	PMAA_064990	alpha-amylase		PMAA_084300	RING finger protein, putative			PMAA_004490	oxysterol binding protein (Osh3)
PMAA_030620	DUF500 and SH3 domain protein	PMAA_070380	involucrin repeat protein	PMAA_058210	alpha/beta hydrolase		PMAA_084830	5-aminolevulinic acid synthase HemA			PMAA_005580	fatty acid synthase alpha subunit FasA
PMAA_032960	molybdopterin binding domain protein	PMAA_071020	multiple ankyrin repeats single kh domain protein	PMAA_057640	bZIP transcription factor		PMAA_086650	conserved hypothetical protein			PMAA_005610	pyruvate dehydrogenase E1 beta subunit PdbA
PMAA_035220	dynactin, putative	PMAA_076310	conserved hypothetical protein	PMAA_066300	benzoate 4-monooxygenase cytochrome P450		PMAA_090730	conserved hypothetical protein			PMAA_006540	conserved hypothetical protein
PMAA_035470	carboxylesterase	PMAA_077810	nitrilase family protein (Nit3)	PMAA_074300	beta-glucosidase, putative		PMAA_091940	conserved hypothetical protein			PMAA_007590	retrovirus polyprotein
PMAA_036000	kinesin family protein	PMAA_078410	Ran-interacting protein Mog1	PMAA_082620	class III chitinase		PMAA_092900	acetylglutamate kinase			PMAA_008830	protein kinase and ribonuclease, Ire1
PMAA_038990	MFS nicotinic acid transporter Tna1	PMAA_078420	conserved hypothetical protein	PMAA_082030	conidial pigment biosynthesis 1,3,6,8-tetrahydroxynaphthalene reductase Arp2		PMAA_093480	conserved hypothetical protein			PMAA_009820	cell wall serine-threonine-rich galactomannoprotein Mp1
PMAA_039540	DNA replication factor C subunit, Rfc3	PMAA_080350	threonyl-tRNA synthetase	PMAA_082040	conidial pigment biosynthesis scytalone dehydratase Arp1		PMAA_099880	WD repeat protein			PMAA_011520	snRNA cap binding complex subunit, Gcr3
PMAA_039640	R3H domain protein	PMAA_080670	3-hydroxyacyl-CoA dehyrogenase	PMAA_066040	conserved glutamic acid-rich protein		PMAA_017640	conserved hypothetical protein			PMAA_013650	C6 transcription factor (OTam)
PMAA_039930	conserved hypothetical protein	PMAA_081600	conserved hypothetical protein	PMAA_025700	conserved hypothetical protein		PMAA_021280	Indoleamine 2,3-dioxygenase subfamily			PMAA_015260	hypothetical protein
PMAA_040020	conserved hypothetical protein	PMAA_082670	glutamyl-tRNA synthetase	PMAA_056120	conserved hypothetical protein		PMAA_038320	conserved hypothetical protein			PMAA_015360	DNA helicase recq
PMAA_042280	aryl-alcohol dehydrogenase	PMAA_093350	dienelactone hydrolase family protein	PMAA_008220	conserved hypothetical protein		PMAA_075980	transcriptional regulator Medusa			PMAA_016000	bleomycin hydrolase
PMAA_043060	flavin-binding monooxygenase	PMAA_093360	C2H2 finger domain protein	PMAA_012160	conserved hypothetical protein		PMAA_080560	SNF2 family helicase/ATPase			PMAA_017130	transcription initiation protein
PMAA_046420	NAD(+)-isocitrate dehydrogenase subunit I	PMAA_096380	von Willebrand and RING finger domain protein	PMAA_058480	conserved hypothetical protein		PMAA_044710	mitochondrial inner membrane AAA protease Yta12			PMAA_018640	cytochrome P450 monooxygenase
PMAA_048230	ribose-5-phosphate isomerase B	PMAA_096820	hypothetical protein PMAA_096820	PMAA_001470	conserved hypothetical protein						PMAA_019770	conserved hypothetical protein
PMAA_050700	conserved hypothetical protein	PMAA_098430	conserved hypothetical protein	PMAA_101530	conserved hypothetical protein						PMAA_020770	conserved hypothetical protein
PMAA_051360	F-actin capping protein beta subunit			PMAA_007780	conserved hypothetical protein						PMAA_022080	Rho GTPase activator (Sac7)
PMAA_052080	cation efflux family protein			PMAA_051100	conserved hypothetical protein						PMAA_024520	c-14 sterol reductase
PMAA_052210	mitochondrial carrier protein			PMAA_027290	conserved hypothetical protein						PMAA_024760	glycogenin, mRNA
PMAA_052600	carbonate dehydratase, putative			PMAA_095560	conserved hypothetical protein						PMAA_025880	cytochrome P450 monooxygenase
PMAA_053710	hypothetical protein PMAA_053710			PMAA_097290	conserved hypothetical protein						PMAA_031950	4-hydroxyphenylpyruvate dioxygenase
PMAA_053860	conserved hypothetical protein			PMAA_060150	conserved hypothetical protein						PMAA_031980	conserved hypothetical protein
PMAA_054360	alcohol dehydrogenase, zinc-containing			PMAA_019010	conserved hypothetical protein						PMAA_033630	DUF1264 domain protein
PMAA_055410	conserved hypothetical protein			PMAA_036400	conserved hypothetical protein						PMAA_035040	thiamine pyrophosphate enzyme
PMAA_055540	dual specificity phosphatase catalytic domain protein			PMAA_021820	conserved hypothetical protein						PMAA_035260	chitin synthase ChsE
PMAA_055990	14-3-3 family protein ArtA			PMAA_034920	conserved hypothetical protein						PMAA_036120	ThiJ/PfpI family protein
PMAA_059830	conserved hypothetical protein			PMAA_050290	conserved hypothetical protein						PMAA_037580	hypothetical protein
PMAA_060900	5-oxoprolinase			PMAA_045600	conserved hypothetical protein						PMAA_038970	transposable element tc3 transposase
PMAA_063790	nitrilase			PMAA_084450	conserved hypothetical protein						PMAA_040090	phosphoesterase
PMAA_064600	NADH-ubiquinone oxidoreductase 304 kDa subunit precursor			PMAA_008200	conserved hypothetical protein						PMAA_040300	sodium P-type ATPase
PMAA_065540	hydroxyisocaproate dehydrogenase			PMAA_081680	developmental regulatory protein wetA						PMAA_040700	steroid alpha reductase family protein
PMAA_065680	nucleoside-diphosphate-sugar epimerase			PMAA_054650	endo-1,3-beta-glucanase Engl1						PMAA_040890	conserved hypothetical protein
PMAA_068520	carnitine acetyl transferase			PMAA_010220	glutaminase GtaA						PMAA_041070	Sit4-associated protein (Sap185)
PMAA_069900	cystathionine beta-synthase			PMAA_017210	hydroxymethylglutaryl-CoA synthase, Erg13						PMAA_043430	amine oxidase
PMAA_071630	NADH-ubiquinone oxidoreductase 18 kDa subunit			PMAA_020890	hypothetical protein PMAA_020890						PMAA_044650	nicotinamide N-methyltransferase
PMAA_071690	uridine kinase			PMAA_063100	hypothetical protein PMAA_063100						PMAA_046930	L-allo-threonine aldolase
PMAA_071760	cytochrome P450			PMAA_007740	hypothetical protein						PMAA_047990	hypothetical protein
PMAA_073270	pyridoxamine phosphate oxidase			PMAA_049510	hypothetical protein						PMAA_053000	hypothetical protein PMAA_053000
PMAA_073320	pentatricopeptide repeat protein			PMAA_075640	leucoanthocyanidin dioxygenase						PMAA_053530	conserved hypothetical protein
PMAA_079980	conserved hypothetical protein			PMAA_095670	metalloprotease MEP1						PMAA_054400	PSP1 domain protein
PMAA_080980	histone acetylase complex subunit Paf400			PMAA_027300	mitochondrial cytochrome b2-like						PMAA_057450	ferrooxidoreductase Fet3
PMAA_081090	farnesyl-pyrophosphate synthetase			PMAA_002930	nonribosomal peptide synthase SidD						PMAA_058520	conserved hypothetical protein
PMAA_081450	NADH-ubiquinone oxidoreductase			PMAA_016400	opsin, putative						PMAA_058900	ankyrin repeat-containing protein
PMAA_084740	electron transfer flavoprotein, beta subunit			PMAA_041760	phosphatidyl synthase						PMAA_065470	tryptophan permease
PMAA_085050	UV excision repair protein (RadW)			PMAA_039120	polyketide synthase						PMAA_065590	metalloreductase, putative
PMAA_086380	cytosine deaminase-uracil phosphoribosyltranserferase fusion protein			PMAA_060200	rRNA maturation protein (Nop14)						PMAA_066490	GNAT family acetyltransferase
PMAA_089000	Phe-inhibited DAHP synthase AroG			PMAA_062210	retrovirus polyprotein						PMAA_066500	bZIP transcription factor (LziP)
PMAA_089220	iron-sulfur protein subunit of succinate dehydrogenase Sdh2			PMAA_079710	serine/threonine protein kinase						PMAA_066510	pogo transposable element
PMAA_091660	conserved hypothetical protein			PMAA_077060	short-chain dehydrogenase/reductase family protein						PMAA_066580	hypothetical protein PMAA_066580
PMAA_091840	pyruvate dehydrogenase kinase			PMAA_096670	small nuclear ribonucleoprotein SmD3						PMAA_070510	pogo transposable element
PMAA_092050	adenylosuccinate lyase Ade13			PMAA_047000	sugar transporter						PMAA_071490	conserved hypothetical protein
PMAA_092720	carnitine acetyl transferase			PMAA_049550	sugar transporter						PMAA_072760	conserved hypothetical protein
PMAA_092770	peptidase family M20/M25/M40			PMAA_059640	sulfonate biosynthesis enzyme						PMAA_074240	ADP-ribosylation factor family protein
PMAA_093910	peptidase, putative			PMAA_086150	tRNA-specific adenosine deaminase subunit TAD2						PMAA_075990	alcohol dehydrogenase
PMAA_094610	peptide N-myristoyl transferase (Nmt1)			PMAA_101620	toxin biosynthesis protein						PMAA_076660	conserved hypothetical protein
PMAA_098380	cytochrome c oxidase subunit V			PMAA_041320	transcription regulator (RTG2)						PMAA_079340	signal transduction protein Syg1
PMAA_099830	cell wall glucanase (Scw11)			PMAA_035770	transcriptional elongation regulator Elc1/Elongin C						PMAA_080010	mitochondrial protein Fmp26
PMAA_057560	conserved hypothetical protein			PMAA_099540	ubiquitin carboxyl-terminal hydrolase isozyme L3						PMAA_081560	cell wall glycosyl hydrolase YteR
PMAA_088690	flavohemoprotein			PMAA_101020	zinc knuckle domain protein						PMAA_082600	aldehyde reductase I (ARI)
PMAA_010280	integral membrane protein			PMAA_023440	DNA ligase I						PMAA_084700	SNF2 family helicase/ATPase
PMAA_069820	leukotriene A4 hydrolase			PMAA_076380	PAPA-1-like conserved region protein						PMAA_084770	carboxypeptidase S1
PMAA_072140	GPI-anchored cell surface glycoprotein			PMAA_036890	RNA annealing protein Yra1						PMAA_087990	C6 transcription factor
PMAA_083730	MutT/nudix family protein			PMAA_006080	aryl-alcohol dehydrogenase Aad14						PMAA_088670	conserved hypothetical protein
PMAA_085430	mitochondrial ATPase (Afg1)			PMAA_006690	cell wall glycosyl hydrolase Dfg5						PMAA_090390	hypothetical protein PMAA_090390
PMAA_087420	biotin apo-protein ligase			PMAA_020560	conserved hypothetical protein						PMAA_091290	protein phosphatase regulatory subunit Gac1
PMAA_021140	oxysterol binding protein (Osh5)			PMAA_078660	conserved hypothetical protein						PMAA_091310	hypothetical protein
PMAA_030170	conserved hypothetical protein			PMAA_076680	conserved hypothetical protein						PMAA_091910	hypothetical protein
PMAA_040070	alpha/beta hydrolase			PMAA_089910	glucooligosaccharide oxidase						PMAA_092380	HLH transcription factor
PMAA_041330	prenyltransferase			PMAA_096860	homeobox transcription factor						PMAA_092640	lipase, putative
PMAA_065440	alcohol dehydrogenase			PMAA_059970	nonribosomal peptide synthase 23706						PMAA_093920	sensor histidine kinase/response regulator
PMAA_071070	mitochondrial inner membrane nuclease Nuc1			PMAA_084230	phosphatidylethanolamine methyltransferase						PMAA_094890	Protein phosphatase 2C
PMAA_020080	phosphoglycerate mutase family domain protein										PMAA_097060	kynureninase, putative
PMAA_071750	conserved hypothetical protein										PMAA_100150	aldehyde dehydrogenase
											PMAA_102280	hypothetical protein
											PMAA_102310	DNA helicase recq
											PMAA_102470	hypothetical protein PMAA_102470
											PMAA_102650	conserved hypothetical protein
											PMAA_016130	E3 ubiquitin-protein ligase PIB1
											PMAA_028110	translation initiation regulator (Gcn20)
											PMAA_000930	conserved hypothetical protein
