# Supplementary material for: Cell-Type–Specific Transcriptional Profiles of the Dimorphic Pathogen Penicillium marneffei Reflect Distinct Reproductive, Morphological, and Environmental Demands
Source: G3 (Bethesda). 2013 Nov 1;3(11):1997–2014. doi: 10.1534/g3.113.006809 (PMC3815061; doi:10.1534/g3.113.006809)
Supplement: Supporting Information [file supp_g3.113.006809_TableS5.xls]

## Sheet: 5 early and late clusters
Table S5. MeV early and late gene expression curated clusters
Cluster 1		Cluster 2		Cluster 3		Cluster 4		Cluster 5
PMAA ID	Function	PMAA ID	Function	PMAA ID	Function	PMAA ID	Function	PMAA ID	Function
PMAA_005310	conserved hypothetical protein	PMAA_006540	conserved hypothetical protein	PMAA_001470	conserved hypothetical protein	PMAA_007590	retrovirus polyprotein, putative	PMAA_016820	conserved hypothetical protein
PMAA_007740	hypothetical protein	PMAA_017210	hydroxymethylglutaryl-CoA synthase Erg13, putative	PMAA_006240	NACHT domain protein	PMAA_015590	hypothetical protein PMAA_015590	PMAA_032350	phosphoenolpyruvate carboxykinase AcuF
PMAA_009130	COP9 signalosome subunit CsnD	PMAA_019030	phosphatidylserine decarboxylase Psd2	PMAA_021000	trehalose synthase (Ccg-9), putative	PMAA_016130	E3 ubiquitin-protein ligase PIB1	PMAA_049950	hypothetical protein PMAA_049950
PMAA_012920	isocitrate dehydrogenase Idp1	PMAA_019770	conserved hypothetical protein	PMAA_028700	actin cortical patch component, putative	PMAA_018640	cytochrome P450 monooxygenase	PMAA_051400	mitochondrial integral membrane protein
PMAA_015680	biotin synthase, putative	PMAA_020890	hypothetical protein PMAA_020890	PMAA_032450	conserved hypothetical protein	PMAA_018860	conserved hypothetical protein	PMAA_093480	conserved hypothetical protein
PMAA_018570	allergen Asp F3, mRNA	PMAA_021910	AP-1 adaptor complex subunit sigma	PMAA_046420	NAD(+)-isocitrate dehydrogenase subunit I	PMAA_047990	hypothetical protein	PMAA_097070	indoleamine 2,3-dioxygenase pyrrole 2,3-dioxygenase
PMAA_028330	NADH-ubiquinone oxidoreductase subunit B	PMAA_022080	Rho GTPase activator (Sac7)	PMAA_053710	hypothetical protein PMAA_053710	PMAA_072760	conserved hypothetical protein	PMAA_011350	exocyst complex component Sec15
PMAA_028960	riboflavin kinase, putative	PMAA_033510	dihydroxyacetone kinase (DakA), putative	PMAA_079960	myosin type II heavy chain, putative	PMAA_074850	nuclear segregation protein (Bfr1)	PMAA_017130	transcription initiation protein
PMAA_029990	conserved hypothetical protein	PMAA_035110	hypothetical protein PMAA_035110	PMAA_080350	threonyl-tRNA synthetase	PMAA_075300	C2H2 type conidiation transcription factor BrlA	PMAA_025700	conserved hypothetical protein
PMAA_030170	conserved hypothetical protein	PMAA_035770	transcriptional elongation regulator Elc1/Elongin C	PMAA_002470	kinesin, putative	PMAA_078940	cell wall glucanase	PMAA_054200	Sin3 complex subunit (Stb2)
PMAA_031420	conserved hypothetical protein	PMAA_039680	glyceraldehyde 3-phosphate dehydrogenase GpdA	PMAA_003040	40S ribosomal protein S4, putative	PMAA_080010	mitochondrial protein Fmp26	PMAA_059270	MFS alpha-glucoside transporter,
PMAA_034920	conserved hypothetical protein	PMAA_040890	conserved hypothetical protein	PMAA_005510	snoRNA binding protein, putative	PMAA_081560	cell wall glycosyl hydrolase YteR, putative	PMAA_062660	hypothetical protein PMAA_062660
PMAA_036000	kinesin family protein	PMAA_041270	vacuolar ATPase 98 kDa subunit	PMAA_010380	GTP-binding protein EsdC	PMAA_091310	hypothetical protein	PMAA_072910	retrograde regulation protein 2
PMAA_041840	ATP binding protein	PMAA_041760	phosphatidyl synthase	PMAA_013020	RNA binding protein Ligatin/Tma64	PMAA_093520	conserved hypothetical protein	PMAA_093490	G1/S-specific cyclin Pcl5
PMAA_042130	G2/M-specific cyclin NimE	PMAA_043430	amine oxidase	PMAA_015960	O-methyltransferase	PMAA_097060	kynureninase	PMAA_019810	stomatin family protein
PMAA_042510	vacuolar ATP synthase subunit c	PMAA_045180	exosome complex exonuclease Rrp40	PMAA_018930	DNA replication licensing factor Mcm2	PMAA_100150	aldehyde dehydrogenase	PMAA_021280	Indoleamine 2,3-dioxygenase subfamily
PMAA_047000	sugar transporter	PMAA_063480	Rho guanyl nucleotide exchange factor	PMAA_019850	conserved hypothetical protein	PMAA_000930	conserved hypothetical protein	PMAA_051480	conserved hypothetical protein
PMAA_047890	C6 finger domain protein	PMAA_064100	ribosomal protein S13p/S18e	PMAA_022480	kinesin family protein (KlpA), putative	PMAA_002420	conserved hypothetical protein	PMAA_059970	nonribosomal peptide synthase, putative
PMAA_049550	sugar transporter	PMAA_065590	metalloreductase, putative	PMAA_024740	conserved hypothetical protein	PMAA_002910	acetyltransferase SidF	PMAA_068520	carnitine acetyl transferase
PMAA_051360	F-actin capping protein beta subunit	PMAA_066580	hypothetical protein PMAA_066580	PMAA_029890	assimilatory sulfite reductase	PMAA_002930	nonribosomal peptide synthase SidD
PMAA_053860	conserved hypothetical protein	PMAA_075860	Sin3-associated polypeptide Sap18	PMAA_033130	thiamin pyrophosphokinase-related protein	PMAA_004050	conserved hypothetical protein
PMAA_055990	14-3-3 family protein ArtA	PMAA_079710	serine/threonine protein kinase	PMAA_037600	Rho guanyl nucleotide exchange factor	PMAA_006730	beta-alanine synthase
PMAA_058480	conserved hypothetical protein	PMAA_080560	SNF2 family helicase/ATPase	PMAA_038990	MFS nicotinic acid transporter Tna1	PMAA_007760	hypothetical protein PMAA_007760
PMAA_065170	conserved hypothetical protein	PMAA_087990	C6 transcription factor	PMAA_039850	hypothetical protein PMAA_039850	PMAA_008200	conserved hypothetical protein
PMAA_066120	C6 transcription factor RosA-like	PMAA_088670	conserved hypothetical protein	PMAA_041110	salicylate hydroxylase, putative	PMAA_009820	cell wall serine-threonine-rich galactomannoprotein Mp1
PMAA_067490	Arp2/3 complex subunit (Arp2)	PMAA_095560	conserved hypothetical protein	PMAA_041410	aminotransferase, classes I and II, putative	PMAA_013650	C6 transcription factor (OTam)
PMAA_084830	5-aminolevulinic acid synthase HemA	PMAA_101020	zinc knuckle domain protein	PMAA_045960	conserved hypothetical protein	PMAA_015360	DNA helicase RecQ
PMAA_086150	tRNA-specific adenosine deaminase subunit TAD2	PMAA_005580	fatty acid synthase alpha subunit FasA	PMAA_063120	D-aminoacylase, putative	PMAA_015580	conserved hypothetical protein
PMAA_093380	C6 finger domain protein	PMAA_005610	pyruvate dehydrogenase E1 beta subunit PdbA	PMAA_065680	nucleoside-diphosphate-sugar epimerase, putative	PMAA_016000	bleomycin hydrolase
PMAA_093910	peptidase, putative	PMAA_006690	cell wall glycosyl hydrolase Dfg5	PMAA_068140	isocitrate dehydrogenase, NAD-dependent	PMAA_017080	conserved hypothetical protein
PMAA_094610	peptide N-myristoyl transferase (Nmt1)	PMAA_006930	G protein complex alpha subunit GanA	PMAA_069010	copper amine oxidase	PMAA_018660	glutathione S-transferase, putative
PMAA_001740	conserved hypothetical protein	PMAA_007780	conserved hypothetical protein	PMAA_069030	conserved hypothetical protein	PMAA_020600	hemolysin-III channel protein Izh2
PMAA_003920	hypothetical protein PMAA_003920	PMAA_007900	DNA helicase recq, putative	PMAA_070810	GTP binding protein (Bud4), putative	PMAA_020770	conserved hypothetical protein
PMAA_005360	C2H2 finger domain protein	PMAA_008220	conserved hypothetical protein	PMAA_071760	cytochrome P450, putative	PMAA_021380	conserved hypothetical protein
PMAA_006080	aryl-alcohol dehydrogenase Aad14	PMAA_008830	protein kinase and ribonuclease, Ire1	PMAA_076130	meiosis induction protein kinase (IME2)	PMAA_024520	c-14 sterol reductase
PMAA_010130	calcium/calmodulin-dependent protein kinase	PMAA_009150	CCCH zinc finger protein	PMAA_078410	Ran-interacting protein Mog1	PMAA_024760	60S ribosomal protein L12
PMAA_010280	integral membrane protein	PMAA_010220	glutaminase GtaA	PMAA_081600	conserved hypothetical protein	PMAA_028110	translation initiation regulator (Gcn20)
PMAA_013400	pheromone maturation dipeptidyl aminopeptidase DapB	PMAA_011520	snRNA cap binding complex subunit, Gcr3	PMAA_086350	seryl-tRNA synthetase	PMAA_031950	4-hydroxyphenylpyruvate dioxygenase
PMAA_014380	Golgi transport protein Sly1	PMAA_012160	conserved hypothetical protein	PMAA_092770	peptidase family M20/M25/M40 protein	PMAA_031980	conserved hypothetical protein
PMAA_014440	conserved hypothetical protein	PMAA_015260	hypothetical protein	PMAA_093350	dienelactone hydrolase family protein	PMAA_033630	DUF1264 domain protein
PMAA_015910	endothelin-converting enzyme	PMAA_016020	branched-chain amino acid aminotransferase	PMAA_096820	hypothetical protein PMAA_096820	PMAA_035040	thiamine pyrophosphate enzyme
PMAA_015980	salicylate hydroxylase	PMAA_016400	opsin, putative	PMAA_042280	aryl-alcohol dehydrogenase	PMAA_036120	ThiJ/PfpI family protein
PMAA_017720	copper homeostasis protein	PMAA_017430	beta-glucosidase, putative	PMAA_070380	involucrin repeat protein	PMAA_037620	conserved hypothetical protein
PMAA_018330	HATPase_c domain protein	PMAA_017640	conserved hypothetical protein	PMAA_016120	6 transcription factor (War1), putative	PMAA_038320	conserved hypothetical protein
PMAA_019260	ARID/BRIGHT domain protein (SWI1)	PMAA_019010	conserved hypothetical protein	PMAA_022200	phosphoketolase, putative	PMAA_038970	transposable element Tc3 transposase
PMAA_019390	ribonuclease p/mrp subunit	PMAA_020560	conserved hypothetical protein	PMAA_026340	40S ribosomal protein S26	PMAA_039450	deoxyhypusine synthase
PMAA_020080	phosphoglycerate mutase family domain protein	PMAA_023330	zinc metalloproteinase	PMAA_037460	NAD binding Rossmann fold oxidoreductase	PMAA_040300	sodium P-type ATPase, putative
PMAA_020160	electron transfer flavoprotein-ubiquinone oxidoreductase	PMAA_023440	DNA ligase I	PMAA_046890	alkaline serine protease	PMAA_040470	antigenic cell wall galactomannoprotein
PMAA_021140	oxysterol binding protein (Osh5)	PMAA_025670	C2H2 transcription factor	PMAA_047150	40S ribosomal protein S21	PMAA_040700	steroid alpha reductase family protein
PMAA_021820	conserved hypothetical protein	PMAA_025880	cytochrome P450 monooxygenase	PMAA_060070	60S acidic ribosomal protein, P2/allergen Asp F B, mRNA	PMAA_044650	nicotinamide N-methyltransferase
PMAA_022690	aldehyde reductase (GliO)	PMAA_028000	GPI-anchored cell wall organization protein Ecm33	PMAA_063460	GTP-binding nuclear protein Ran	PMAA_046930	L-allo-threonine aldolase
PMAA_023300	mitochondrial protein Fmp25	PMAA_028120	conserved hypothetical protein	PMAA_084260	glutamyl-tRNA synthetase cofactor, putative	PMAA_049510	hypothetical protein PMAA_049510
PMAA_024550	conserved hypothetical protein	PMAA_028730	NAD+ dependent glutamate, dehydrogenase	PMAA_094010	proteasome component Pre1, putative	PMAA_054400	PSP1 domain protein
PMAA_024900	mitochondrial ADP,ATP carrier protein (Ant)	PMAA_035260	chitin synthase ChsE	PMAA_003060	oxidoreductase, FAD-binding	PMAA_057450	ferrooxidoreductase Fet3
PMAA_027300	mitochondrial cytochrome b2-like	PMAA_035660	ATP citrate lyase, subunit 1	PMAA_004760	vacuolar H+\/Ca2+ exchanger	PMAA_058520	conserved hypothetical protein
PMAA_028140	conserved hypothetical protein	PMAA_036890	RNA annealing protein Yra1	PMAA_010470	conserved hypothetical protein	PMAA_058900	ankyrin repeat-containing protein, putative
PMAA_028880	hexokinase Kxk	PMAA_037580	hypothetical protein	PMAA_014300	conserved hypothetical protein	PMAA_065470	tryptophan permease
PMAA_029640	proline iminopeptidase	PMAA_040090	phosphoesterase, putative	PMAA_016360	ribosomal protein S5	PMAA_066490	GNAT family acetyltransferase
PMAA_030620	DUF500 and SH3 domain protein	PMAA_040500	CSL family zinc fnger-containing protein	PMAA_022840	conserved hypothetical protein	PMAA_066510	pogo transposable element
PMAA_031100	Rho guanyl nucleotide exchange factor	PMAA_041070	Sit4-associated protein (Sap185)	PMAA_026430	60S acidic ribosomal protein P1	PMAA_071490	conserved hypothetical protein
PMAA_032300	cytochrome c oxidase assembly protein cox15	PMAA_041320	transcription regulator (RTG2)	PMAA_027500	mitochondrial carrier protein	PMAA_074240	ADP-ribosylation factor family protein
PMAA_032960	molybdopterin binding domain protein	PMAA_042070	DNA repair protein (Rad1)	PMAA_034090	C6 transcription factor, putative	PMAA_075980	transcriptional regulator Medusa
PMAA_035220	dynactin, putative	PMAA_044270	C2H2 transcription factor	PMAA_039430	nucleolar RNA methyltransferase (Nop2), putative	PMAA_078310	CRAL/TRIO domain protein
PMAA_035470	carboxylesterase	PMAA_044710	mitochondrial inner membrane AAA protease Yta12	PMAA_040230	phosphoribosyl-aminoimidazole carboxylase	PMAA_082250	conserved hypothetical protein
PMAA_036400	conserved hypothetical protein	PMAA_049350	C2H2 transcription factor (Crea)	PMAA_040640	iron-sulfur cluster assembly accessory protein Isa1, putative	PMAA_082600	reverse transcriptase
PMAA_037440	ribosome biogenesis ABC transporter Arb1	PMAA_050290	conserved hypothetical protein	PMAA_045360	PDCD2_C domain protein, putative	PMAA_084700	SNF2 family helicase/ATPase
PMAA_039120	polyketide synthase,2263	PMAA_053000	hypothetical protein PMAA_053000	PMAA_048230	mitochondrial intermembrane space translocase subunit Tim10	PMAA_087470	eukaryotic translation initiation factor subunit eIF-4F
PMAA_039540	DNA replication factor C subunit, Rfc3	PMAA_053530	conserved hypothetical protein	PMAA_052600	carbonate dehydratase, putative	PMAA_090390	hypothetical protein PMAA_090390
PMAA_039640	R3H domain protein	PMAA_055980	ATPase inhibitor, mitochondrial precursor	PMAA_053340	60S ribosomal protein L12	PMAA_091290	protein phosphatase regulatory subunit Gac1
PMAA_039810	ubiquitin hydrolase CreB	PMAA_057640	bZIP transcription factor	PMAA_053350	transposon	PMAA_091910	hypothetical protein
PMAA_039930	conserved hypothetical protein	PMAA_058210	alpha/beta hydrolase	PMAA_054240	ribosomal L18ae protein family	PMAA_092380	HLH transcription factor, putative
PMAA_040020	conserved hypothetical protein	PMAA_059370	alpha-N-acetylglucosaminidase	PMAA_054810	Eukaryotic translation initiation factor eIF-5A	PMAA_092640	lipase
PMAA_040070	alpha/beta hydrolase	PMAA_059640	sulfonate biosynthesis enzyme	PMAA_055500	60S ribosomal protein L27a	PMAA_102280	hypothetical protein
PMAA_040210	GATA transcription factor LreB	PMAA_060200	rRNA maturation protein (Nop14)	PMAA_055590	glutamate-1-semialdehyde 2,1-aminomutase, putative	PMAA_102650	conserved hypothetical protein
PMAA_041170	proteasome activator subunit 4	PMAA_062210	retrovirus polyprotein	PMAA_057360	conserved hypothetical protein	PMAA_027290	conserved hypothetical protein
PMAA_041190	conserved hypothetical protein	PMAA_063000	zinc alcohol dehydrogenase	PMAA_063950	thymidylate synthase	PMAA_094890	protein phosphatase 2C
PMAA_041330	prenyltransferase	PMAA_064990	alpha-amylase, putative	PMAA_084450	conserved hypothetical protein
PMAA_041380	involucrin repeat protein	PMAA_065580	2-deoxy-D-gluconate 3-dehydrogenase	PMAA_084780	MFS transporter, putative
PMAA_041520	vacuolar protein sorting-associated protein vps13	PMAA_066040	conserved glutamic acid-rich protein	PMAA_085020	sulfur metabolism regulator SkpA
PMAA_041990	anthranilate phosphorbosyltransferase	PMAA_066300	benzoate 4-monooxygenase cytochrome P450	PMAA_090940	60S ribosomal protein L3
PMAA_043060	flavin-binding monooxygenase	PMAA_066500	bZIP transcription factor (LziP)	PMAA_093830	CTP synthase, putative
PMAA_045500	pheromone processing Carboxypeptidase KexA	PMAA_070510	pogo transposable element	PMAA_094650	translation elongation factor G1, putative
PMAA_045600	conserved hypothetical protein	PMAA_072140	GPI-anchored cell surface glycoprotein	PMAA_009290	methylenetetrahydrofolate dehydrogenase
PMAA_045900	hypothetical protein PMAA_045900	PMAA_074300	beta-glucosidase, putative	PMAA_017780	alkanesulfonate monooxygenase, putative
PMAA_049040	MFS monosaccharide transporter	PMAA_074840	conserved hypothetical protein	PMAA_027680	aldehyde reductase I (ARI)
PMAA_050700	conserved hypothetical protein	PMAA_075640	leucoanthocyanidin dioxygenase	PMAA_042500	adenylylsulfate kinase
PMAA_051100	conserved hypothetical protein	PMAA_075990	alcohol dehydrogenase	PMAA_078420	conserved hypothetical protein
PMAA_052080	cation efflux family protein	PMAA_076380	PAPA-1-like conserved region protein	PMAA_081090	farnesyl-pyrophosphate synthetase
PMAA_052210	mitochondrial carrier protein	PMAA_076660	copia protein	PMAA_082670	glutamyl-tRNA synthetase
PMAA_054360	alcohol dehydrogenase, zinc-containing	PMAA_076680	conserved hypothetical protein	PMAA_086380	cytosine deaminase-uracil phosphoribosyltranserferase fusion protein
PMAA_054370	conserved hypothetical protein	PMAA_077060	short-chain dehydrogenase/reductase family protein	PMAA_086650	conserved hypothetical protein
PMAA_054570	exocyst complex component Sec3	PMAA_079130	conserved hypothetical protein	PMAA_002720	40S ribosomal protein S9
PMAA_054650	endo-1,3-beta-glucanase Engl1	PMAA_079340	signal transduction protein Syg1	PMAA_006650	6-phosphofructokinase alpha subunit
PMAA_055410	conserved hypothetical protein	PMAA_082040	conidial pigment biosynthesis scytalone dehydratase Arp1	PMAA_032390	tRNA(m5U54)methyltransferase
PMAA_055540	dual specificity phosphatase catalytic domain protein	PMAA_084230	phosphatidylethanolamine methyltransferase	PMAA_079980	conserved hypothetical protein
PMAA_056120	conserved hypothetical protein	PMAA_084770	carboxypeptidase S1
PMAA_057320	TBC domain protein	PMAA_089910	glucooligosaccharide oxidase
PMAA_057560	conserved hypothetical protein	PMAA_090730	conserved hypothetical protein
PMAA_059560	conserved hypothetical protein	PMAA_091380	3-oxoacyl-acyl-carrier-protein synthase
PMAA_059830	conserved hypothetical protein	PMAA_093920	sensor histidine kinase/response regulator
PMAA_060150	conserved hypothetical protein	PMAA_095250	EF hand domain protein
PMAA_060250	AAA family ATPase	PMAA_095670	metalloprotease MEP1
PMAA_060900	5-oxoprolinase	PMAA_096670	small nuclear ribonucleoprotein SmD3
PMAA_062740	conserved hypothetical protein	PMAA_097290	conserved hypothetical protein
PMAA_063100	hypothetical protein PMAA_063100	PMAA_100160	hypothetical protein PMAA_100160
PMAA_063790	nitrilase	PMAA_101530	conserved hypothetical protein
PMAA_064600	NADH-ubiquinone oxidoreductase 304 kDa subunit precursor	PMAA_101620	toxin biosynthesis protein
PMAA_064620	2-oxoisovalerate dehydrogenase complex alpha subunit	PMAA_102310	DNA helicase recq
PMAA_065120	conserved hypothetical protein	PMAA_102470	hypothetical protein PMAA_102470
PMAA_065440	alcohol dehydrogenase	PMAA_000780	hypothetical protein PMAA_000780
PMAA_065540	hydroxyisocaproate dehydrogenase	PMAA_004490	oxysterol binding protein (Osh3)
PMAA_068430	sexual development activator VeA	PMAA_004750	sugar transporter
PMAA_069820	leukotriene A4 hydrolase	PMAA_024190	ribosomal protein L16a
PMAA_069900	cystathionine beta-synthase	PMAA_014120	GABA permease, putative
PMAA_070290	APSES transcription factor StuA
PMAA_071020	multiple ankyrin repeats single kh domain protein
PMAA_071070	mitochondrial inner membrane nuclease Nuc1
PMAA_071630	NADH-ubiquinone oxidoreductase 18 kDa subunit
PMAA_071690	uridine kinase
PMAA_073270	pyridoxamine phosphate oxidase
PMAA_073320	pentatricopeptide repeat protein
PMAA_073640	C6 transcription factor
PMAA_075290	MFS multidrug transporter
PMAA_076310	conserved hypothetical protein
PMAA_077810	nitrilase family protein (Nit3)
PMAA_078660	conserved hypothetical protein
PMAA_080130	PH domain protein
PMAA_080670	3-hydroxyacyl-CoA dehyrogenase
PMAA_080980	histone acetylase complex subunit Paf400
PMAA_081450	NADH-ubiquinone oxidoreductase
PMAA_081680	developmental regulatory protein wetA
PMAA_082030	conidial pigment biosynthesis 1,3,6,8-tetrahydroxynaphthalene reductase Arp2
PMAA_082150	PHD transcription factor (Rum1)
PMAA_082620	class III chitinase
PMAA_083630	calcineurin catalytic subunit CnaA
PMAA_083730	MutT/nudix family protein
PMAA_084280	conserved hypothetical protein
PMAA_084300	RING finger protein, putative
PMAA_084740	electron transfer flavoprotein, beta subunit
PMAA_085050	UV excision repair protein (RadW)
PMAA_085430	mitochondrial ATPase (Afg1)
PMAA_087420	biotin apo-protein ligase
PMAA_088110	conserved hypothetical protein
PMAA_088690	flavohemoprotein
PMAA_089000	Phe-inhibited DAHP synthase AroG
PMAA_089220	iron-sulfur protein subunit of succinate dehydrogenase Sdh2
PMAA_091660	conserved hypothetical protein
PMAA_091840	pyruvate dehydrogenase kinase
PMAA_091940	conserved hypothetical protein
PMAA_091960	small nuclear ribonucleoprotein (LSM1)
PMAA_092050	adenylosuccinate lyase Ade13
PMAA_092720	carnitine acetyl transferase
PMAA_092900	acetylglutamate kinase
PMAA_093360	C2H2 finger domain protein
PMAA_094330	cation chloride cotransporter
PMAA_096380	von Willebrand and RING finger domain protein
PMAA_098380	cytochrome c oxidase subunit V
PMAA_098430	conserved hypothetical protein
PMAA_099540	ubiquitin carboxyl-terminal hydrolase isozyme L3
PMAA_099830	cell wall glucanase (Scw11), putative
PMAA_099880	WD repeat protein
PMAA_100870	Na+/H+ antiporter, putative
PMAA_011150	hexose carrier protein
PMAA_070190	Ras small monomeric GTPase RasB
PMAA_096860	homeobox transcription factor
PMAA_009630	conserved hypothetical protein
PMAA_054460	C-8 sterol isomerase (Erg-1)
PMAA_056390	C2H2 transcription factor (Seb1), putative
