# Supplementary material for: Cell-Type–Specific Transcriptional Profiles of the Dimorphic Pathogen Penicillium marneffei Reflect Distinct Reproductive, Morphological, and Environmental Demands
Source: G3 (Bethesda). 2013 Nov 1;3(11):1997–2014. doi: 10.1534/g3.113.006809 (PMC3815061; doi:10.1534/g3.113.006809)
Supplement: Supporting Information [file supp_g3.113.006809_TableS6.xls]

## Sheet: Cluster 1
Table S6. GO associations for phase-specific expression clusters.
Ontology Aspect: Process
GO ID	TERM	CORRECTED PVALUE	UNCORRECTED PVALUE	NUM LIST ANNOTATIONS	LIST SIZE	TOTAL NUM ANNOTATIONS	POPULATION SIZE	FDR RATE	EXPECTED FALSE POSITIVES	P. marneffei Gene Model ID
GO:0006091	generation of precursor metabolites and energy	-	6.58536e-07	11	97	127	7448	0	0	PMAA_089220, PMAA_012920, PMAA_098380, PMAA_071630, PMAA_046420, PMAA_028330, PMAA_064600, PMAA_055990, PMAA_024900, PMAA_032300, PMAA_028880
GO:0006853	carnitine shuttle	-	0.000167889	2	97	2	7448	0.15	0.3	PMAA_068520, PMAA_092720
GO:0015669	gas transport	-	0.000167889	2	97	2	7448	0.1	0.3	PMAA_055410, PMAA_088690
GO:0015671	oxygen transport	-	0.000167889	2	97	2	7448	0.075	0.3	PMAA_055410, PMAA_088690
GO:0015980	energy derivation by oxidation of organic compounds	-	0.000279684	6	97	70	7448	0.076	0.38	PMAA_055990, PMAA_089220, PMAA_012920, PMAA_098380, PMAA_024900, PMAA_046420
GO:0006102	isocitrate metabolic process	-	0.000499383	2	97	3	7448	0.09	0.54	PMAA_012920, PMAA_046420
GO:0006577	amino-acid betaine metabolic process	-	0.000499383	2	97	3	7448	0.0771	0.54	PMAA_068520, PMAA_092720
GO:0008655	pyrimidine-containing compound salvage	-	0.000499383	2	97	3	7448	0.0675	0.54	PMAA_071690, PMAA_086380
GO:0009437	carnitine metabolic process	-	0.000499383	2	97	3	7448	0.06	0.54	PMAA_068520, PMAA_092720
GO:0015879	carnitine transport	-	0.000499383	2	97	3	7448	0.054	0.54	PMAA_068520, PMAA_092720
GO:0032365	intracellular lipid transport	-	0.000499383	2	97	3	7448	0.0491	0.54	PMAA_068520, PMAA_092720
GO:0045333	cellular respiration	-	0.000763135	5	97	56	7448	0.0633	0.76	PMAA_089220, PMAA_012920, PMAA_098380, PMAA_024900, PMAA_046420
GO:0015695	organic cation transport	-	0.000990278	2	97	4	7448	0.0738	0.96	PMAA_068520, PMAA_092720
GO:0015697	quaternary ammonium group transport	-	0.000990278	2	97	4	7448	0.0686	0.96	PMAA_068520, PMAA_092720
GO:0015838	amino-acid betaine transport	-	0.000990278	2	97	4	7448	0.064	0.96	PMAA_068520, PMAA_092720
GO:0015909	long-chain fatty acid transport	-	0.000990278	2	97	4	7448	0.06	0.96	PMAA_068520, PMAA_092720
GO:0019684	photosynthesis, light reaction	-	0.000990278	2	97	4	7448	0.0565	0.96	PMAA_028330, PMAA_064600
GO:0055114	oxidation-reduction process	-	0.00190909	26	97	1124	7448	0.0856	1.54	PMAA_089220, PMAA_081450, PMAA_098380, PMAA_046420, PMAA_028330, PMAA_020160, PMAA_055990, PMAA_073270, PMAA_042280, PMAA_024900, PMAA_030170, PMAA_012920, PMAA_065680, PMAA_071760, PMAA_069010, PMAA_079980, PMAA_054360, PMAA_071630, PMAA_065440, PMAA_088690, PMAA_084740, PMAA_043060, PMAA_064600, PMAA_065540, PMAA_032300, PMAA_029890
GO:0022900	electron transport chain	-	0.00207867	3	97	20	7448	0.0916	1.74	PMAA_098380, PMAA_071630, PMAA_032300
GO:0006862	nucleotide transport	-	0.00243386	2	97	6	7448	0.106	2.12	PMAA_024900, PMAA_038990
GO:0015908	fatty acid transport	-	0.00243386	2	97	6	7448	0.101	2.12	PMAA_068520, PMAA_092720
GO:0009060	aerobic respiration	-	0.00246284	4	97	44	7448	0.0991	2.18	PMAA_089220, PMAA_012920, PMAA_024900, PMAA_046420
GO:0071705	nitrogen compound transport	-	0.0027556	3	97	22	7448	0.1009	2.32	PMAA_068520, PMAA_092720, PMAA_024900
GO:0015979	photosynthesis	-	0.00337854	2	97	7	7448	0.1208	2.9	PMAA_028330, PMAA_064600
GO:0045733	acetate catabolic process	-	0.00337854	2	97	7	7448	0.116	2.9	PMAA_068520, PMAA_092720
GO:0051181	cofactor transport	-	0.00337854	2	97	7	7448	0.1115	2.9	PMAA_024900, PMAA_038990
GO:0006869	lipid transport	-	0.0035541	3	97	24	7448	0.1141	3.08	PMAA_068520, PMAA_021140, PMAA_092720
GO:0006099	tricarboxylic acid cycle	-	0.00400095	3	97	25	7448	0.1221	3.42	PMAA_089220, PMAA_012920, PMAA_046420
GO:0009109	coenzyme catabolic process	-	0.00400095	3	97	25	7448	0.1179	3.42	PMAA_089220, PMAA_012920, PMAA_046420
GO:0010876	lipid localization	-	0.00400095	3	97	25	7448	0.114	3.42	PMAA_068520, PMAA_021140, PMAA_092720
GO:0046356	acetyl-CoA catabolic process	-	0.00400095	3	97	25	7448	0.1103	3.42	PMAA_089220, PMAA_012920, PMAA_046420
GO:0000077	DNA damage checkpoint	-	0.0044805	3	97	26	7448	0.1244	3.98	PMAA_055990, PMAA_039540, PMAA_085020
GO:0051187	cofactor catabolic process	-	0.0044805	3	97	26	7448	0.1206	3.98	PMAA_089220, PMAA_012920, PMAA_046420
GO:0044087	regulation of cellular component biogenesis	-	0.00519701	4	97	54	7448	0.1312	4.46	PMAA_055990, PMAA_051360, PMAA_085020, PMAA_067490
GO:0006537	glutamate biosynthetic process	-	0.0056942	2	97	9	7448	0.1503	5.26	PMAA_012920, PMAA_046420
GO:0015718	monocarboxylic acid transport	-	0.0056942	2	97	9	7448	0.1461	5.26	PMAA_068520, PMAA_092720
GO:0043254	regulation of protein complex assembly	-	0.00612194	3	97	29	7448	0.1476	5.46	PMAA_051360, PMAA_085020, PMAA_067490
GO:0006796	phosphate-containing compound metabolic process	-	0.00744405	11	97	364	7448	0.1658	6.3	PMAA_071690, PMAA_055540, PMAA_021140, PMAA_098380, PMAA_080980, PMAA_085020, PMAA_076130, PMAA_083730, PMAA_091840, PMAA_093910, PMAA_028880
GO:0006793	phosphorus metabolic process	-	0.00759347	11	97	365	7448	0.1615	6.3	PMAA_071690, PMAA_055540, PMAA_021140, PMAA_098380, PMAA_080980, PMAA_085020, PMAA_076130, PMAA_083730, PMAA_091840, PMAA_093910, PMAA_028880
GO:0006084	acetyl-CoA metabolic process	-	0.00880479	3	97	33	7448	0.1755	7.02	PMAA_089220, PMAA_012920, PMAA_046420
GO:0015837	amine transport	-	0.0101773	2	97	12	7448	0.1927	7.9	PMAA_068520, PMAA_092720
GO:0018106	peptidyl-histidine phosphorylation	-	0.0101773	2	97	12	7448	0.1881	7.9	PMAA_093910, PMAA_091840
GO:0045460	sterigmatocystin metabolic process	-	0.0101773	2	97	12	7448	0.1837	7.9	PMAA_076130, PMAA_088690
GO:0045461	sterigmatocystin biosynthetic process	-	0.0101773	2	97	12	7448	0.1795	7.9	PMAA_076130, PMAA_088690
GO:0031570	DNA integrity checkpoint	-	0.0103665	3	97	35	7448	0.1782	8.02	PMAA_055990, PMAA_039540, PMAA_085020
GO:0006915	apoptotic process	-	0.0120789	3	97	37	7448	0.2039	9.38	PMAA_024900, PMAA_071070, PMAA_019390
GO:0012501	programmed cell death	-	0.0120789	3	97	37	7448	0.1996	9.38	PMAA_024900, PMAA_071070, PMAA_019390
GO:0006083	acetate metabolic process	-	0.0137971	2	97	14	7448	0.2196	10.54	PMAA_068520, PMAA_092720
GO:0006536	glutamate metabolic process	-	0.0137971	2	97	14	7448	0.2151	10.54	PMAA_012920, PMAA_046420
GO:0008219	cell death	-	0.0149352	3	97	40	7448	0.2248	11.24	PMAA_024900, PMAA_071070, PMAA_019390
GO:0016265	death	-	0.0149352	3	97	40	7448	0.2204	11.24	PMAA_024900, PMAA_071070, PMAA_019390
GO:0030041	actin filament polymerization	-	0.0178895	2	97	16	7448	0.2515	13.08	PMAA_051360, PMAA_067490
GO:0030833	regulation of actin filament polymerization	-	0.0178895	2	97	16	7448	0.2468	13.08	PMAA_051360, PMAA_067490
GO:0008064	regulation of actin polymerization or depolymerization	-	0.0201047	2	97	17	7448	0.2611	14.1	PMAA_051360, PMAA_067490
GO:0009403	toxin biosynthetic process	-	0.0201047	2	97	17	7448	0.2564	14.1	PMAA_076130, PMAA_088690
GO:0009404	toxin metabolic process	-	0.0201047	2	97	17	7448	0.2518	14.1	PMAA_076130, PMAA_088690
GO:0030832	regulation of actin filament length	-	0.0201047	2	97	17	7448	0.2474	14.1	PMAA_051360, PMAA_067490
GO:0006839	mitochondrial transport	-	0.0217014	3	97	46	7448	0.2603	15.1	PMAA_068520, PMAA_092720, PMAA_024900
GO:0000916	actomyosin contractile ring contraction	-	0.0224283	2	97	18	7448	0.2749	16.22	PMAA_055990, PMAA_051360
GO:0018202	peptidyl-histidine modification	-	0.0224283	2	97	18	7448	0.2703	16.22	PMAA_093910, PMAA_091840
GO:0032271	regulation of protein polymerization	-	0.0224283	2	97	18	7448	0.2659	16.22	PMAA_051360, PMAA_067490
GO:0036213	contractile ring contraction	-	0.0224283	2	97	18	7448	0.2616	16.22	PMAA_055990, PMAA_051360
GO:0000160	two-component signal transduction system (phosphorelay)	-	0.0248571	2	97	19	7448	0.2768	17.44	PMAA_093910, PMAA_091840
GO:0008154	actin polymerization or depolymerization	-	0.0248571	2	97	19	7448	0.2725	17.44	PMAA_051360, PMAA_067490
GO:0044283	small molecule biosynthetic process	-	0.025008	8	97	272	7448	0.2686	17.46	PMAA_012920, PMAA_079980, PMAA_046420, PMAA_069900, PMAA_073270, PMAA_081090, PMAA_089000, PMAA_069820
GO:0016567	protein ubiquitination	-	0.0256161	3	97	49	7448	0.2685	17.72	PMAA_055990, PMAA_085020, PMAA_085050
GO:0007096	regulation of exit from mitosis	-	0.027388	2	97	20	7448	0.2818	18.88	PMAA_055990, PMAA_085020
GO:0010458	exit from mitosis	-	0.027388	2	97	20	7448	0.2776	18.88	PMAA_055990, PMAA_085020
GO:0042173	regulation of sporulation resulting in formation of a cellular spore	-	0.0327443	2	97	22	7448	0.3043	21	PMAA_076130, PMAA_088690
GO:0051186	cofactor metabolic process	-	0.0332691	6	97	185	7448	0.3037	21.26	PMAA_089220, PMAA_012920, PMAA_079980, PMAA_046420, PMAA_032300, PMAA_032960
GO:0006887	exocytosis	-	0.0355639	2	97	23	7448	0.3149	22.36	PMAA_021140, PMAA_011350
GO:0032446	protein modification by small protein conjugation	-	0.037782	3	97	57	7448	0.3192	22.98	PMAA_055990, PMAA_085020, PMAA_085050
GO:0006732	coenzyme metabolic process	-	0.0384093	5	97	143	7448	0.3162	23.08	PMAA_089220, PMAA_012920, PMAA_079980, PMAA_046420, PMAA_032960
GO:0015976	carbon utilization	-	0.0384739	2	97	24	7448	0.3335	24.68	PMAA_092720, PMAA_052600
GO:0043094	cellular metabolic compound salvage	-	0.0384739	2	97	24	7448	0.3291	24.68	PMAA_071690, PMAA_086380
GO:0045595	regulation of cell differentiation	-	0.0384739	2	97	24	7448	0.3247	24.68	PMAA_076130, PMAA_088690
GO:0072329	monocarboxylic acid catabolic process	-	0.0384739	2	97	24	7448	0.3205	24.68	PMAA_068520, PMAA_092720
GO:0006508	proteolysis	-	0.0385577	8	97	296	7448	0.3167	24.7	PMAA_065680, PMAA_013400, PMAA_015910, PMAA_085430, PMAA_085020, PMAA_093910, PMAA_069820, PMAA_085050
GO:0045786	negative regulation of cell cycle	-	0.0398204	4	97	99	7448	0.3162	24.98	PMAA_055990, PMAA_039540, PMAA_085020, PMAA_081090
GO:0000075	cell cycle checkpoint	-	0.0412108	3	97	59	7448	0.3185	25.48	PMAA_055990, PMAA_039540, PMAA_085020
GO:0009084	glutamine family amino acid biosynthetic process	-	0.0414715	2	97	25	7448	0.3284	26.6	PMAA_012920, PMAA_046420
GO:0032956	regulation of actin cytoskeleton organization	-	0.0414715	2	97	25	7448	0.3244	26.6	PMAA_051360, PMAA_067490
GO:0032970	regulation of actin filament-based process	-	0.0414715	2	97	25	7448	0.3205	26.6	PMAA_051360, PMAA_067490
GO:0016310	phosphorylation	-	0.0425949	8	97	302	7448	0.3183	26.74	PMAA_071690, PMAA_098380, PMAA_080980, PMAA_085020, PMAA_076130, PMAA_091840, PMAA_093910, PMAA_028880
GO:0071156	regulation of cell cycle arrest	-	0.0429822	3	97	60	7448	0.3158	26.84	PMAA_055990, PMAA_039540, PMAA_085020
GO:XXXXXXX	unannotated	-	0.0445327	23	97	1238	7448	0.3151	27.1	PMAA_039930, PMAA_035470, PMAA_073320, PMAA_092770, PMAA_040020, PMAA_010280, PMAA_049950, PMAA_072140, PMAA_009150, PMAA_059830, PMAA_028140, PMAA_028700, PMAA_003920, PMAA_001740, PMAA_050700, PMAA_041330, PMAA_005310, PMAA_053860, PMAA_040070, PMAA_030620, PMAA_053710, PMAA_039640, PMAA_091660
GO:0044550	secondary metabolite biosynthetic process	-	0.0445541	2	97	26	7448	0.3202	27.86	PMAA_076130, PMAA_088690
GO:0051258	protein polymerization	-	0.0445541	2	97	26	7448	0.3166	27.86	PMAA_051360, PMAA_067490
GO:0032940	secretion by cell	-	0.0477189	2	97	27	7448	0.3285	29.24	PMAA_021140, PMAA_011350
GO:0046903	secretion	-	0.0477189	2	97	27	7448	0.3249	29.24	PMAA_021140, PMAA_011350
GO:0032535	regulation of cellular component size	-	0.0509634	2	97	28	7448	0.3369	30.66	PMAA_051360, PMAA_067490
GO:0051248	negative regulation of protein metabolic process	-	0.0509634	2	97	28	7448	0.3333	30.66	PMAA_055990, PMAA_085050
GO:0090066	regulation of anatomical structure size	-	0.0509634	2	97	28	7448	0.3297	30.66	PMAA_051360, PMAA_067490
GO:0018130	heterocycle biosynthetic process	-	0.0526145	6	97	207	7448	0.3304	31.06	PMAA_071690, PMAA_076130, PMAA_092050, PMAA_032300, PMAA_088690, PMAA_032960
GO:0008202	steroid metabolic process	-	0.0564256	3	97	67	7448	0.3448	32.76	PMAA_065680, PMAA_021140, PMAA_081090
GO:0006865	amino acid transport	-	0.0584918	3	97	68	7448	0.3538	33.96	PMAA_068520, PMAA_092720, PMAA_052210
GO:0006461	protein complex assembly	-	0.0594891	4	97	113	7448	0.3532	34.26	PMAA_051360, PMAA_085020, PMAA_067490, PMAA_032300
GO:0070271	protein complex biogenesis	-	0.0610612	4	97	114	7448	0.3527	34.56	PMAA_051360, PMAA_085020, PMAA_067490, PMAA_032300
GO:0008652	cellular amino acid biosynthetic process	-	0.0610711	5	97	163	7448	0.3509	34.74	PMAA_069900, PMAA_012920, PMAA_089000, PMAA_079980, PMAA_046420
GO:0044271	cellular nitrogen compound biosynthetic process	-	0.0644268	6	97	218	7448	0.3626	36.26	PMAA_071690, PMAA_086380, PMAA_092050, PMAA_032300, PMAA_052210, PMAA_032960
GO:0007015	actin filament organization	-	0.0646875	2	97	32	7448	0.3685	37.22	PMAA_051360, PMAA_067490
GO:0010639	negative regulation of organelle organization	-	0.0646875	2	97	32	7448	0.3649	37.22	PMAA_051360, PMAA_085020
GO:0007050	cell cycle arrest	-	0.0649019	3	97	71	7448	0.365	37.6	PMAA_055990, PMAA_039540, PMAA_085020
GO:0016053	organic acid biosynthetic process	-	0.0667303	6	97	220	7448	0.3692	38.4	PMAA_069900, PMAA_012920, PMAA_069820, PMAA_089000, PMAA_079980, PMAA_046420
GO:0046394	carboxylic acid biosynthetic process	-	0.0667303	6	97	220	7448	0.3657	38.4	PMAA_069900, PMAA_012920, PMAA_069820, PMAA_089000, PMAA_079980, PMAA_046420
GO:0048519	negative regulation of biological process	-	0.0677979	7	97	276	7448	0.3651	38.7	PMAA_055990, PMAA_051360, PMAA_039540, PMAA_085020, PMAA_081090, PMAA_085050, PMAA_088690
GO:0030435	sporulation resulting in formation of a cellular spore	-	0.0709536	4	97	120	7448	0.3806	40.72	PMAA_055990, PMAA_076130, PMAA_067490, PMAA_088690
GO:0009272	fungal-type cell wall biogenesis	-	0.0719632	2	97	34	7448	0.3904	42.16	PMAA_055990, PMAA_067490
GO:0070647	protein modification by small protein conjugation or removal	-	0.0739295	3	97	75	7448	0.3899	42.5	PMAA_055990, PMAA_085020, PMAA_085050
GO:0032787	monocarboxylic acid metabolic process	-	0.0744241	4	97	122	7448	0.3875	42.62	PMAA_068520, PMAA_012920, PMAA_092720, PMAA_069820
GO:0071702	organic substance transport	-	0.0747454	5	97	173	7448	0.3859	42.84	PMAA_068520, PMAA_021140, PMAA_011150, PMAA_092720, PMAA_052210
GO:0051493	regulation of cytoskeleton organization	-	0.07949	2	97	36	7448	0.412	46.14	PMAA_051360, PMAA_067490
GO:0048468	cell development	-	0.081048	3	97	78	7448	0.4126	46.62	PMAA_055990, PMAA_076130, PMAA_067490
GO:0051129	negative regulation of cellular component organization	-	0.0833421	2	97	37	7448	0.4225	48.16	PMAA_051360, PMAA_085020
GO:0015849	organic acid transport	-	0.0834849	3	97	79	7448	0.4217	48.5	PMAA_068520, PMAA_092720, PMAA_052210
GO:0046942	carboxylic acid transport	-	0.0834849	3	97	79	7448	0.4181	48.5	PMAA_068520, PMAA_092720, PMAA_052210
GO:0044248	cellular catabolic process	-	0.0860576	11	97	534	7448	0.4205	49.2	PMAA_068520, PMAA_089220, PMAA_012920, PMAA_094650, PMAA_092720, PMAA_071070, PMAA_085430, PMAA_046420, PMAA_067490, PMAA_085020, PMAA_085050
GO:0071822	protein complex subunit organization	-	0.0872353	4	97	129	7448	0.4183	49.36	PMAA_051360, PMAA_085020, PMAA_067490, PMAA_032300
GO:0009110	vitamin biosynthetic process	-	0.0872504	2	97	38	7448	0.4205	50.04	PMAA_073270, PMAA_079980
GO:0042364	water-soluble vitamin biosynthetic process	-	0.0872504	2	97	38	7448	0.417	50.04	PMAA_073270, PMAA_079980
GO:0009056	catabolic process	-	0.0897553	14	97	730	7448	0.4155	50.28	PMAA_068520, PMAA_089220, PMAA_012920, PMAA_094650, PMAA_092720, PMAA_071070, PMAA_085430, PMAA_046420, PMAA_067490, PMAA_085020, PMAA_099830, PMAA_069820, PMAA_085050, PMAA_028880
GO:0006766	vitamin metabolic process	-	0.0912129	2	97	39	7448	0.4266	52.04	PMAA_073270, PMAA_079980
GO:0006767	water-soluble vitamin metabolic process	-	0.0912129	2	97	39	7448	0.4231	52.04	PMAA_073270, PMAA_079980
GO:0043937	regulation of sporulation	-	0.0912129	2	97	39	7448	0.4197	52.04	PMAA_076130, PMAA_088690
GO:0032506	cytokinetic process	-	0.0961325	3	97	84	7448	0.4322	54.02	PMAA_055990, PMAA_051360, PMAA_085020
GO:0006790	sulfur compound metabolic process	-	0.0987516	3	97	85	7448	0.4379	55.18	PMAA_069900, PMAA_085020, PMAA_029890
GO:0034293	sexual sporulation	-	0.0987516	3	97	85	7448	0.4345	55.18	PMAA_055990, PMAA_067490, PMAA_088690
GO:0043935	sexual sporulation resulting in formation of a cellular spore	-	0.0987516	3	97	85	7448	0.4311	55.18	PMAA_055990, PMAA_067490, PMAA_088690
GO:0030154	cell differentiation	-	0.10937	4	97	140	7448	0.4578	59.06	PMAA_055990, PMAA_076130, PMAA_067490, PMAA_088690
GO:0048523	negative regulation of cellular process	-	0.110053	6	97	252	7448	0.4571	59.42	PMAA_055990, PMAA_051360, PMAA_039540, PMAA_085020, PMAA_081090, PMAA_088690
GO:0043623	cellular protein complex assembly	-	0.112271	3	97	90	7448	0.4605	60.32	PMAA_051360, PMAA_085020, PMAA_067490
GO:0003006	developmental process involved in reproduction	-	0.11581	4	97	143	7448	0.4641	61.26	PMAA_055990, PMAA_076130, PMAA_067490, PMAA_088690
GO:0030163	protein catabolic process	-	0.11581	4	97	143	7448	0.4606	61.26	PMAA_085020, PMAA_085430, PMAA_069820, PMAA_085050
GO:0051641	cellular localization	-	0.120297	10	97	505	7448	0.4794	64.24	PMAA_068520, PMAA_051360, PMAA_021140, PMAA_092720, PMAA_085430, PMAA_067490, PMAA_055990, PMAA_024900, PMAA_011350, PMAA_035220
GO:0042493	response to drug	-	0.120301	2	97	46	7448	0.4895	66.08	PMAA_089220, PMAA_085020
GO:0042546	cell wall biogenesis	-	0.124627	2	97	47	7448	0.4956	67.4	PMAA_055990, PMAA_067490
GO:0006897	endocytosis	-	0.12899	2	97	48	7448	0.498	68.22	PMAA_021140, PMAA_067490
GO:0006725	cellular aromatic compound metabolic process	-	0.129177	4	97	149	7448	0.4959	68.44	PMAA_076130, PMAA_089000, PMAA_088690, PMAA_032960
GO:0006520	cellular amino acid metabolic process	-	0.130308	7	97	325	7448	0.4944	68.72	PMAA_068520, PMAA_069900, PMAA_012920, PMAA_092720, PMAA_089000, PMAA_079980, PMAA_046420
GO:0048646	anatomical structure formation involved in morphogenesis	-	0.131466	4	97	150	7448	0.4927	68.98	PMAA_055990, PMAA_076130, PMAA_067490, PMAA_088690
GO:0065003	macromolecular complex assembly	-	0.132428	5	97	207	7448	0.4936	69.6	PMAA_055990, PMAA_051360, PMAA_085020, PMAA_067490, PMAA_032300
GO:0006694	steroid biosynthetic process	-	0.137822	2	97	50	7448	0.501	71.14	PMAA_065680, PMAA_081090
GO:0018193	peptidyl-amino acid modification	-	0.138248	3	97	99	7448	0.5007	71.6	PMAA_093910, PMAA_091840, PMAA_094610
GO:0010564	regulation of cell cycle process	-	0.140789	4	97	154	7448	0.5001	72.02	PMAA_055990, PMAA_039540, PMAA_085020, PMAA_081090
GO:0009064	glutamine family amino acid metabolic process	-	0.142287	2	97	51	7448	0.5065	73.44	PMAA_012920, PMAA_046420
GO:0043581	mycelium development	-	0.142287	2	97	51	7448	0.503	73.44	PMAA_055410, PMAA_052600
GO:0065004	protein-DNA complex assembly	-	0.142287	2	97	51	7448	0.4996	73.44	PMAA_055990, PMAA_085020
GO:0032502	developmental process	-	0.142628	7	97	333	7448	0.4962	73.44	PMAA_055990, PMAA_076130, PMAA_055410, PMAA_052600, PMAA_067490, PMAA_088690, PMAA_094610
GO:0043934	sporulation	-	0.143161	4	97	155	7448	0.4964	73.96	PMAA_055990, PMAA_076130, PMAA_067490, PMAA_088690
GO:0009057	macromolecule catabolic process	-	0.144795	6	97	273	7448	0.4968	74.52	PMAA_085020, PMAA_099830, PMAA_071070, PMAA_085430, PMAA_069820, PMAA_085050
GO:0007275	multicellular organismal development	-	0.14733	3	97	102	7448	0.5013	75.7	PMAA_076130, PMAA_055410, PMAA_052600
GO:0046483	heterocycle metabolic process	-	0.150522	9	97	465	7448	0.5041	76.62	PMAA_071690, PMAA_094650, PMAA_092050, PMAA_067490, PMAA_088690, PMAA_073270, PMAA_076130, PMAA_032300, PMAA_032960
GO:0003333	amino acid transmembrane transport	-	0.151309	2	97	53	7448	0.5041	77.12	PMAA_068520, PMAA_092720
GO:0030003	cellular cation homeostasis	-	0.151309	2	97	53	7448	0.5008	77.12	PMAA_085020, PMAA_052080
GO:0032501	multicellular organismal process	-	0.153491	3	97	104	7448	0.4994	77.4	PMAA_076130, PMAA_055410, PMAA_052600
GO:0016311	dephosphorylation	-	0.155862	2	97	54	7448	0.5054	78.84	PMAA_055540, PMAA_021140
GO:0019748	secondary metabolic process	-	0.155862	2	97	54	7448	0.5022	78.84	PMAA_076130, PMAA_088690
GO:0048856	anatomical structure development	-	0.16108	6	97	282	7448	0.5078	80.24	PMAA_055990, PMAA_076130, PMAA_055410, PMAA_052600, PMAA_067490, PMAA_088690
GO:0051649	establishment of localization in cell	-	0.161137	8	97	408	7448	0.505	80.3	PMAA_068520, PMAA_021140, PMAA_092720, PMAA_024900, PMAA_085430, PMAA_067490, PMAA_035220, PMAA_011350
GO:0051656	establishment of organelle localization	-	0.165046	2	97	56	7448	0.5094	81.5	PMAA_067490, PMAA_035220
GO:0055080	cation homeostasis	-	0.165046	2	97	56	7448	0.5062	81.5	PMAA_085020, PMAA_052080
GO:0071824	protein-DNA complex subunit organization	-	0.165046	2	97	56	7448	0.5031	81.5	PMAA_055990, PMAA_085020
GO:0006811	ion transport	-	0.172809	4	97	167	7448	0.5125	83.54	PMAA_068520, PMAA_092720, PMAA_052080, PMAA_052210
GO:0019953	sexual reproduction	-	0.172809	4	97	167	7448	0.5094	83.54	PMAA_055990, PMAA_076130, PMAA_067490, PMAA_088690
GO:0000910	cytokinesis	-	0.178909	3	97	112	7448	0.5109	84.3	PMAA_055990, PMAA_051360, PMAA_085020
GO:0006464	cellular protein modification process	-	0.180723	9	97	486	7448	0.5143	85.38	PMAA_055540, PMAA_055990, PMAA_085020, PMAA_076130, PMAA_091840, PMAA_093910, PMAA_087420, PMAA_085050, PMAA_094610
GO:0036211	protein modification process	-	0.180723	9	97	486	7448	0.5113	85.38	PMAA_055540, PMAA_055990, PMAA_085020, PMAA_076130, PMAA_091840, PMAA_093910, PMAA_087420, PMAA_085050, PMAA_094610
GO:0051716	cellular response to stimulus	-	0.188331	11	97	625	7448	0.5199	87.34	PMAA_089220, PMAA_071070, PMAA_085430, PMAA_088690, PMAA_055990, PMAA_085020, PMAA_039540, PMAA_076130, PMAA_091840, PMAA_093910, PMAA_085050
GO:0019438	aromatic compound biosynthetic process	-	0.188392	2	97	61	7448	0.5211	88.06	PMAA_089000, PMAA_032960
GO:0006873	cellular ion homeostasis	-	0.193117	2	97	62	7448	0.5224	88.8	PMAA_085020, PMAA_052080
GO:0033043	regulation of organelle organization	-	0.195351	3	97	117	7448	0.5258	89.92	PMAA_051360, PMAA_085020, PMAA_067490
GO:0051188	cofactor biosynthetic process	-	0.195351	3	97	117	7448	0.5228	89.92	PMAA_079980, PMAA_032300, PMAA_032960
GO:0044265	cellular macromolecule catabolic process	-	0.196338	4	97	176	7448	0.5216	90.24	PMAA_085020, PMAA_071070, PMAA_085430, PMAA_085050
Ontology Aspect: Function
GO ID	TERM	CORRECTED PVALUE	UNCORRECTED PVALUE	NUM LIST ANNOTATIONS	LIST SIZE	TOTAL NUM ANNOTATIONS	POPULATION SIZE	FDR RATE	EXPECTED FALSE POSITIVES	P. marneffei Gene Model ID
GO:0016651	oxidoreductase activity, acting on NADH or NADPH	0.00369122	3.29573e-05	6	97	48	7448	0	0	PMAA_081450, PMAA_071630, PMAA_028330, PMAA_032300, PMAA_064600, PMAA_029890
GO:0004092	carnitine O-acetyltransferase activity	0.0188036	0.000167889	2	97	2	7448	0.07	0.14	PMAA_068520, PMAA_092720
GO:0016406	carnitine O-acyltransferase activity	0.0188036	0.000167889	2	97	2	7448	0.0467	0.14	PMAA_068520, PMAA_092720
GO:0019825	oxygen binding	0.0188036	0.000167889	2	97	2	7448	0.035	0.14	PMAA_055410, PMAA_088690
GO:0003954	NADH dehydrogenase activity	0.0639975	0.000571406	4	97	30	7448	0.06	0.3	PMAA_081450, PMAA_071630, PMAA_028330, PMAA_064600
GO:0008137	NADH dehydrogenase (ubiquinone) activity	0.0639975	0.000571406	4	97	30	7448	0.05	0.3	PMAA_081450, PMAA_071630, PMAA_028330, PMAA_064600
GO:0050136	NADH dehydrogenase (quinone) activity	0.0639975	0.000571406	4	97	30	7448	0.0429	0.3	PMAA_081450, PMAA_071630, PMAA_028330, PMAA_064600
GO:0016655	oxidoreductase activity, acting on NADH or NADPH, quinone or similar compound as acceptor	0.104072	0.000929212	4	97	34	7448	0.04	0.32	PMAA_081450, PMAA_071630, PMAA_028330, PMAA_064600
GO:0004448	isocitrate dehydrogenase activity	0.110911	0.000990278	2	97	4	7448	0.0467	0.42	PMAA_012920, PMAA_046420

## Sheet: Cluster 2
Table S6. GO associations for phase-specific expression clusters.
Ontology Aspect: Process
GO ID	TERM	CORRECTED PVALUE	UNCORRECTED PVALUE	NUM LIST ANNOTATIONS	LIST SIZE	TOTAL NUM ANNOTATIONS	POPULATION SIZE	FDR RATE	EXPECTED FALSE POSITIVES	P. marneffei Gene Model ID
GO:0009156	ribonucleoside monophosphate biosynthetic process	-	0.0081872	2	41	25	7448	1	1	PMAA_028960, PMAA_040230
GO:0009161	ribonucleoside monophosphate metabolic process	-	0.0081872	2	41	25	7448	1	2	PMAA_028960, PMAA_040230
GO:0009124	nucleoside monophosphate biosynthetic process	-	0.0140154	2	41	33	7448	1	3	PMAA_028960, PMAA_040230
GO:0009123	nucleoside monophosphate metabolic process	-	0.0148399	2	41	34	7448	1	4	PMAA_028960, PMAA_040230
GO:0030582	fruiting body development	-	0.015685	2	41	35	7448	1	5	PMAA_070290, PMAA_041990
GO:0030584	sporocarp development	-	0.015685	2	41	35	7448	1	6	PMAA_070290, PMAA_041990
GO:0048608	reproductive structure development	-	0.0262674	2	41	46	7448	1	7	PMAA_070290, PMAA_041990
GO:0075259	spore-bearing organ development	-	0.0262674	2	41	46	7448	1	8	PMAA_070290, PMAA_041990
GO:0048513	organ development	-	0.0273405	2	41	47	7448	1	9	PMAA_070290, PMAA_041990
GO:0006418	tRNA aminoacylation for protein translation	-	0.0295392	2	41	49	7448	1	10	PMAA_082670, PMAA_080350
GO:0048731	system development	-	0.0295392	2	41	49	7448	1	11	PMAA_070290, PMAA_041990
GO:0043038	amino acid activation	-	0.0318063	2	41	51	7448	1	12	PMAA_082670, PMAA_080350
GO:0043039	tRNA aminoacylation	-	0.0318063	2	41	51	7448	1	13	PMAA_082670, PMAA_080350
GO:0055080	cation homeostasis	-	0.0377628	2	41	56	7448	1	14	PMAA_044270, PMAA_017720
GO:0042592	homeostatic process	-	0.0383399	3	41	136	7448	1	15	PMAA_018570, PMAA_044270, PMAA_017720
GO:0044281	small molecule metabolic process	-	0.0399049	10	41	996	7448	1	16	PMAA_060250, PMAA_080350, PMAA_041990, PMAA_080670, PMAA_002470, PMAA_068140, PMAA_082670, PMAA_028960, PMAA_071020, PMAA_040230
GO:0010628	positive regulation of gene expression	-	0.0467547	2	41	63	7448	1	17	PMAA_060250, PMAA_044270
GO:0045893	positive regulation of transcription, DNA-dependent	-	0.0467547	2	41	63	7448	1	18	PMAA_060250, PMAA_044270
GO:0009058	biosynthetic process	-	0.049388	16	41	1953	7448	1	19	PMAA_060250, PMAA_041170, PMAA_006650, PMAA_068140, PMAA_044270, PMAA_013020, PMAA_070290, PMAA_060070, PMAA_041990, PMAA_080350, PMAA_037600, PMAA_024740, PMAA_082670, PMAA_098430, PMAA_028960, PMAA_040230
GO:0050801	ion homeostasis	-	0.0494554	2	41	65	7448	1	20	PMAA_044270, PMAA_017720
GO:0048878	chemical homeostasis	-	0.057886	2	41	71	7448	1	21	PMAA_044270, PMAA_017720
GO:0051254	positive regulation of RNA metabolic process	-	0.057886	2	41	71	7448	1	22	PMAA_060250, PMAA_044270
GO:0009260	ribonucleotide biosynthetic process	-	0.0593371	2	41	72	7448	0.993	22.84	PMAA_028960, PMAA_040230
GO:0045935	positive regulation of nucleobase-containing compound metabolic process	-	0.0608008	2	41	73	7448	0.985	23.64	PMAA_060250, PMAA_044270
GO:0044249	cellular biosynthetic process	-	0.0621674	15	41	1847	7448	0.9568	23.92	PMAA_060250, PMAA_041170, PMAA_080350, PMAA_041990, PMAA_037600, PMAA_068140, PMAA_044270, PMAA_013020, PMAA_024740, PMAA_098430, PMAA_082670, PMAA_070290, PMAA_060070, PMAA_028960, PMAA_040230
GO:0051173	positive regulation of nitrogen compound metabolic process	-	0.0652661	2	41	76	7448	0.96	24.96	PMAA_060250, PMAA_044270
GO:XXXXXXX	unannotated	-	0.0665838	11	41	1238	7448	0.9348	25.24	PMAA_096820, PMAA_039850, PMAA_093350, PMAA_070380, PMAA_096380, PMAA_081600, PMAA_093360, PMAA_078410, PMAA_056390, PMAA_041190, PMAA_065170
GO:0010557	positive regulation of macromolecule biosynthetic process	-	0.0667788	2	41	77	7448	0.915	25.62	PMAA_060250, PMAA_044270
GO:0055086	nucleobase-containing small molecule metabolic process	-	0.0673385	5	41	401	7448	0.8876	25.74	PMAA_060250, PMAA_071020, PMAA_028960, PMAA_002470, PMAA_040230
GO:0016051	carbohydrate biosynthetic process	-	0.0729455	2	41	81	7448	0.9113	27.34	PMAA_037600, PMAA_006650
GO:0048522	positive regulation of cellular process	-	0.0829121	3	41	187	7448	0.9677	30	PMAA_060250, PMAA_070290, PMAA_044270
GO:0016310	phosphorylation	-	0.0830473	4	41	302	7448	0.9394	30.06	PMAA_078420, PMAA_028960, PMAA_006650, PMAA_010130
GO:0043623	cellular protein complex assembly	-	0.0874561	2	41	90	7448	0.94	31.02	PMAA_041170, PMAA_023300
GO:0009891	positive regulation of biosynthetic process	-	0.089119	2	41	91	7448	0.9282	31.56	PMAA_060250, PMAA_044270
GO:0031328	positive regulation of cellular biosynthetic process	-	0.089119	2	41	91	7448	0.9017	31.56	PMAA_060250, PMAA_044270
GO:0060255	regulation of macromolecule metabolic process	-	0.0939241	8	41	861	7448	0.9	32.4	PMAA_060250, PMAA_041170, PMAA_037600, PMAA_044270, PMAA_013020, PMAA_024740, PMAA_070290, PMAA_098430
GO:0048518	positive regulation of biological process	-	0.0989813	3	41	202	7448	0.9043	33.46	PMAA_060250, PMAA_070290, PMAA_044270
GO:0006520	cellular amino acid metabolic process	-	0.102041	4	41	325	7448	0.8974	34.1	PMAA_082670, PMAA_080350, PMAA_041990, PMAA_068140
GO:0019725	cellular homeostasis	-	0.104498	2	41	100	7448	0.8938	34.86	PMAA_018570, PMAA_044270
GO:0018130	heterocycle biosynthetic process	-	0.104604	3	41	207	7448	0.876	35.04	PMAA_041990, PMAA_028960, PMAA_040230
GO:0031323	regulation of cellular metabolic process	-	0.105621	8	41	884	7448	0.8566	35.12	PMAA_060250, PMAA_041170, PMAA_037600, PMAA_044270, PMAA_013020, PMAA_024740, PMAA_070290, PMAA_098430
GO:0007275	multicellular organismal development	-	0.10801	2	41	102	7448	0.8524	35.8	PMAA_070290, PMAA_041990
GO:0019752	carboxylic acid metabolic process	-	0.10835	5	41	463	7448	0.8349	35.9	PMAA_082670, PMAA_080350, PMAA_041990, PMAA_080670, PMAA_068140
GO:0043436	oxoacid metabolic process	-	0.10835	5	41	463	7448	0.8159	35.9	PMAA_082670, PMAA_080350, PMAA_041990, PMAA_080670, PMAA_068140
GO:0006082	organic acid metabolic process	-	0.109846	5	41	465	7448	0.8062	36.28	PMAA_082670, PMAA_080350, PMAA_041990, PMAA_080670, PMAA_068140
GO:0080090	regulation of primary metabolic process	-	0.109879	8	41	892	7448	0.7909	36.38	PMAA_060250, PMAA_041170, PMAA_037600, PMAA_044270, PMAA_013020, PMAA_024740, PMAA_070290, PMAA_098430
GO:0032501	multicellular organismal process	-	0.111554	2	41	104	7448	0.7868	36.98	PMAA_070290, PMAA_041990
GO:0034645	cellular macromolecule biosynthetic process	-	0.113748	11	41	1360	7448	0.7783	37.36	PMAA_060250, PMAA_041170, PMAA_080350, PMAA_037600, PMAA_044270, PMAA_013020, PMAA_024740, PMAA_098430, PMAA_082670, PMAA_070290, PMAA_060070
GO:0044238	primary metabolic process	-	0.115878	24	41	3576	7448	0.7722	37.84	PMAA_060250, PMAA_041170, PMAA_078420, PMAA_076310, PMAA_029640, PMAA_006650, PMAA_002470, PMAA_068140, PMAA_044270, PMAA_010130, PMAA_013020, PMAA_070290, PMAA_060070, PMAA_080350, PMAA_041990, PMAA_037600, PMAA_080670, PMAA_024740, PMAA_098430, PMAA_082670, PMAA_028960, PMAA_005510, PMAA_071020, PMAA_040230
GO:0010604	positive regulation of macromolecule metabolic process	-	0.116928	2	41	107	7448	0.76	38	PMAA_060250, PMAA_044270
GO:0044271	cellular nitrogen compound biosynthetic process	-	0.117412	3	41	218	7448	0.7475	38.12	PMAA_041990, PMAA_028960, PMAA_040230
GO:0009059	macromolecule biosynthetic process	-	0.11834	11	41	1370	7448	0.7342	38.18	PMAA_060250, PMAA_041170, PMAA_080350, PMAA_037600, PMAA_044270, PMAA_013020, PMAA_024740, PMAA_098430, PMAA_082670, PMAA_070290, PMAA_060070
GO:0042180	cellular ketone metabolic process	-	0.11904	5	41	477	7448	0.7257	38.46	PMAA_082670, PMAA_080350, PMAA_041990, PMAA_080670, PMAA_068140
GO:0006461	protein complex assembly	-	0.127869	2	41	113	7448	0.7619	41.14	PMAA_041170, PMAA_023300
GO:0009165	nucleotide biosynthetic process	-	0.127869	2	41	113	7448	0.748	41.14	PMAA_028960, PMAA_040230
GO:0019222	regulation of metabolic process	-	0.129061	8	41	926	7448	0.7393	41.4	PMAA_060250, PMAA_041170, PMAA_037600, PMAA_044270, PMAA_013020, PMAA_024740, PMAA_070290, PMAA_098430
GO:0070271	protein complex biogenesis	-	0.129717	2	41	114	7448	0.7302	41.62	PMAA_041170, PMAA_023300
GO:0010556	regulation of macromolecule biosynthetic process	-	0.133315	7	41	783	7448	0.7259	42.1	PMAA_060250, PMAA_024740, PMAA_098430, PMAA_070290, PMAA_037600, PMAA_044270, PMAA_013020
GO:2000112	regulation of cellular macromolecule biosynthetic process	-	0.133315	7	41	783	7448	0.7136	42.1	PMAA_060250, PMAA_024740, PMAA_098430, PMAA_070290, PMAA_037600, PMAA_044270, PMAA_013020
GO:0031325	positive regulation of cellular metabolic process	-	0.137169	2	41	118	7448	0.7163	42.98	PMAA_060250, PMAA_044270
GO:0006796	phosphate-containing compound metabolic process	-	0.138427	4	41	364	7448	0.7098	43.3	PMAA_078420, PMAA_028960, PMAA_006650, PMAA_010130
GO:0009893	positive regulation of metabolic process	-	0.139047	2	41	119	7448	0.701	43.46	PMAA_060250, PMAA_044270
GO:0006793	phosphorus metabolic process	-	0.139424	4	41	365	7448	0.6914	43.56	PMAA_078420, PMAA_028960, PMAA_006650, PMAA_010130
GO:0044237	cellular metabolic process	-	0.140336	23	41	3463	7448	0.6816	43.62	PMAA_060250, PMAA_041170, PMAA_078420, PMAA_029640, PMAA_006650, PMAA_002470, PMAA_068140, PMAA_044270, PMAA_010130, PMAA_013020, PMAA_070290, PMAA_060070, PMAA_080350, PMAA_041990, PMAA_037600, PMAA_080670, PMAA_024740, PMAA_098430, PMAA_082670, PMAA_028960, PMAA_005510, PMAA_071020, PMAA_040230
GO:0009889	regulation of biosynthetic process	-	0.141952	7	41	796	7448	0.6818	44.32	PMAA_060250, PMAA_024740, PMAA_098430, PMAA_070290, PMAA_037600, PMAA_044270, PMAA_013020
GO:0031326	regulation of cellular biosynthetic process	-	0.141952	7	41	796	7448	0.6715	44.32	PMAA_060250, PMAA_024740, PMAA_098430, PMAA_070290, PMAA_037600, PMAA_044270, PMAA_013020
GO:0009259	ribonucleotide metabolic process	-	0.144691	3	41	240	7448	0.6666	44.66	PMAA_060250, PMAA_028960, PMAA_040230
GO:0065008	regulation of biological quality	-	0.144691	3	41	240	7448	0.6568	44.66	PMAA_018570, PMAA_044270, PMAA_017720
GO:0034660	ncRNA metabolic process	-	0.145979	3	41	241	7448	0.6525	45.02	PMAA_082670, PMAA_080350, PMAA_005510
GO:0034654	nucleobase-containing compound biosynthetic process	-	0.146618	2	41	123	7448	0.6463	45.24	PMAA_028960, PMAA_040230
GO:0006399	tRNA metabolic process	-	0.152352	2	41	126	7448	0.6496	46.12	PMAA_082670, PMAA_080350
GO:0006091	generation of precursor metabolites and energy	-	0.154274	2	41	127	7448	0.6486	46.7	PMAA_006650, PMAA_068140
GO:0071822	protein complex subunit organization	-	0.158132	2	41	129	7448	0.6521	47.6	PMAA_041170, PMAA_023300
GO:0006807	nitrogen compound metabolic process	-	0.160692	15	41	2116	7448	0.6465	47.84	PMAA_060250, PMAA_080350, PMAA_041990, PMAA_077810, PMAA_002470, PMAA_044270, PMAA_013020, PMAA_024740, PMAA_098430, PMAA_082670, PMAA_070290, PMAA_071020, PMAA_005510, PMAA_028960, PMAA_040230
GO:0051603	proteolysis involved in cellular protein catabolic process	-	0.165904	2	41	133	7448	0.6531	48.98	PMAA_041170, PMAA_029640
GO:0006357	regulation of transcription from RNA polymerase II promoter	-	0.167859	2	41	134	7448	0.6492	49.34	PMAA_060250, PMAA_070290
GO:0044257	cellular protein catabolic process	-	0.169817	2	41	135	7448	0.6442	49.6	PMAA_041170, PMAA_029640
GO:0003006	developmental process involved in reproduction	-	0.185622	2	41	143	7448	0.6695	52.22	PMAA_070290, PMAA_041990
GO:0006732	coenzyme metabolic process	-	0.185622	2	41	143	7448	0.661	52.22	PMAA_028960, PMAA_068140
GO:0030163	protein catabolic process	-	0.185622	2	41	143	7448	0.6527	52.22	PMAA_041170, PMAA_029640
GO:0044283	small molecule biosynthetic process	-	0.187697	3	41	272	7448	0.6486	52.54	PMAA_041990, PMAA_028960, PMAA_068140
GO:0016070	RNA metabolic process	-	0.190438	9	41	1179	7448	0.6488	53.2	PMAA_060250, PMAA_080350, PMAA_044270, PMAA_013020, PMAA_024740, PMAA_098430, PMAA_070290, PMAA_082670, PMAA_005510
GO:0006355	regulation of transcription, DNA-dependent	-	0.192404	6	41	711	7448	0.6516	54.08	PMAA_060250, PMAA_024740, PMAA_098430, PMAA_070290, PMAA_044270, PMAA_013020
GO:2001141	regulation of RNA biosynthetic process	-	0.192404	6	41	711	7448	0.6438	54.08	PMAA_060250, PMAA_024740, PMAA_098430, PMAA_070290, PMAA_044270, PMAA_013020
GO:0051252	regulation of RNA metabolic process	-	0.194987	6	41	714	7448	0.6402	54.42	PMAA_060250, PMAA_024740, PMAA_098430, PMAA_070290, PMAA_044270, PMAA_013020
GO:0006725	cellular aromatic compound metabolic process	-	0.197617	2	41	149	7448	0.6426	55.26	PMAA_041990, PMAA_040230

## Sheet: Cluster 3
Table S6. GO associations for phase-specific expression clusters.
Ontology Aspect: Process
GO ID	TERM	CORRECTED PVALUE	UNCORRECTED PVALUE	NUM LIST ANNOTATIONS	LIST SIZE	TOTAL NUM ANNOTATIONS	POPULATION SIZE	FDR RATE	EXPECTED FALSE POSITIVES	P. marneffei Gene Model ID
GO:XXXXXXX	unannotated	-	5.77e-08	38	96	1238	7448	0	0	PMAA_075860, PMAA_019010, PMAA_076680, PMAA_078660, PMAA_007740, PMAA_020560, PMAA_084450, PMAA_063100, PMAA_066040, PMAA_027290, PMAA_101620, PMAA_008220, PMAA_056120, PMAA_049510, PMAA_058480, PMAA_025700, PMAA_076380, PMAA_045900, PMAA_029990, PMAA_060150, PMAA_036890, PMAA_080130, PMAA_041320, PMAA_097290, PMAA_041840, PMAA_020890, PMAA_007780, PMAA_040500, PMAA_036400, PMAA_045600, PMAA_0956…
GO:0045023	G0 to G1 transition	-	0.00267548	3	96	22	7448	0.9	1.8	PMAA_096670, PMAA_042130, PMAA_017210
GO:0070316	regulation of G0 to G1 transition	-	0.00267548	3	96	22	7448	0.6	1.8	PMAA_096670, PMAA_042130, PMAA_017210
GO:0070317	negative regulation of G0 to G1 transition	-	0.00267548	3	96	22	7448	0.45	1.8	PMAA_096670, PMAA_042130, PMAA_017210
GO:0000320	re-entry into mitotic cell cycle	-	0.00304828	3	96	23	7448	0.416	2.08	PMAA_096670, PMAA_042130, PMAA_017210
GO:0075307	positive regulation of conidium formation	-	0.00437685	2	96	8	7448	0.5767	3.46	PMAA_081680, PMAA_075300
GO:0008643	carbohydrate transport	-	0.00817252	4	96	62	7448	0.82	5.74	PMAA_049040, PMAA_047000, PMAA_049550, PMAA_059270
GO:0043938	positive regulation of sporulation	-	0.0268662	2	96	20	7448	1	8	PMAA_081680, PMAA_075300
GO:0048315	conidium formation	-	0.0276747	3	96	51	7448	1	9	PMAA_081680, PMAA_082040, PMAA_075300
GO:0006696	ergosterol biosynthetic process	-	0.0348953	2	96	23	7448	1	10	PMAA_017210, PMAA_002930
GO:0016129	phytosteroid biosynthetic process	-	0.0348953	2	96	23	7448	1	11	PMAA_017210, PMAA_002930
GO:0044108	cellular alcohol biosynthetic process	-	0.0348953	2	96	23	7448	1	12	PMAA_017210, PMAA_002930
GO:0019954	asexual reproduction	-	0.0350214	4	96	96	7448	1	13	PMAA_081680, PMAA_082040, PMAA_075300, PMAA_006690
GO:0008204	ergosterol metabolic process	-	0.0377539	2	96	24	7448	1	14	PMAA_017210, PMAA_002930
GO:0016128	phytosteroid metabolic process	-	0.0377539	2	96	24	7448	1	15	PMAA_017210, PMAA_002930
GO:0044107	cellular alcohol metabolic process	-	0.0377539	2	96	24	7448	1	16	PMAA_017210, PMAA_002930
GO:0016126	sterol biosynthetic process	-	0.0437278	2	96	26	7448	1	17	PMAA_017210, PMAA_002930
GO:0075306	regulation of conidium formation	-	0.0437278	2	96	26	7448	1	18	PMAA_081680, PMAA_075300
GO:0010948	negative regulation of cell cycle process	-	0.0530384	3	96	66	7448	1	19	PMAA_096670, PMAA_042130, PMAA_017210
GO:0034305	regulation of asexual sporulation	-	0.0600411	2	96	31	7448	1	20	PMAA_081680, PMAA_075300
GO:0006084	acetyl-CoA metabolic process	-	0.0670663	2	96	33	7448	1	21	PMAA_017210, PMAA_035660
GO:0030436	asexual sporulation	-	0.0744362	3	96	76	7448	1	22	PMAA_081680, PMAA_082040, PMAA_075300
GO:0042440	pigment metabolic process	-	0.0818727	2	96	37	7448	1	23	PMAA_081680, PMAA_082040
GO:0043937	regulation of sporulation	-	0.0896197	2	96	39	7448	1	24	PMAA_081680, PMAA_075300
GO:0046165	alcohol biosynthetic process	-	0.0896197	2	96	39	7448	1	25	PMAA_017210, PMAA_002930
GO:0016125	sterol metabolic process	-	0.0975741	2	96	41	7448	1	26	PMAA_017210, PMAA_002930
GO:0051094	positive regulation of developmental process	-	0.114044	2	96	45	7448	1	27	PMAA_081680, PMAA_075300
GO:0071554	cell wall organization or biogenesis	-	0.114752	4	96	144	7448	1	28	PMAA_081680, PMAA_059970, PMAA_054650, PMAA_006690
GO:0042546	cell wall biogenesis	-	0.122531	2	96	47	7448	1	29	PMAA_081680, PMAA_006690
GO:0045786	negative regulation of cell cycle	-	0.135204	3	96	99	7448	1	30	PMAA_096670, PMAA_042130, PMAA_017210
GO:0006694	steroid biosynthetic process	-	0.135537	2	96	50	7448	1	31	PMAA_017210, PMAA_002930
GO:0019748	secondary metabolic process	-	0.153327	2	96	54	7448	1	32	PMAA_082040, PMAA_002930
GO:0008610	lipid biosynthetic process	-	0.158502	4	96	163	7448	1	33	PMAA_084230, PMAA_017210, PMAA_091380, PMAA_002930
GO:0070882	cellular cell wall organization or biogenesis	-	0.165658	3	96	109	7448	1	34	PMAA_081680, PMAA_059970, PMAA_006690
GO:0008654	phospholipid biosynthetic process	-	0.166954	2	96	57	7448	1	35	PMAA_084230, PMAA_017210
GO:0006278	RNA-dependent DNA replication	-	0.176153	2	96	59	7448	1	36	PMAA_101020, PMAA_062210
GO:0071702	organic substance transport	-	0.183697	4	96	173	7448	1	37	PMAA_049040, PMAA_047000, PMAA_049550, PMAA_059270
Ontology Aspect: Function
GO ID	TERM	CORRECTED PVALUE	UNCORRECTED PVALUE	NUM LIST ANNOTATIONS	LIST SIZE	TOTAL NUM ANNOTATIONS	POPULATION SIZE	FDR RATE	EXPECTED FALSE POSITIVES	P. marneffei Gene Model ID
GO:XXXXXXX	unannotated	1.15e-06	1.49e-08	34	96	969	7448	0	0	PMAA_075860, PMAA_019010, PMAA_076680, PMAA_078660, PMAA_007740, PMAA_084450, PMAA_063100, PMAA_066040, PMAA_101620, PMAA_008220, PMAA_100870, PMAA_056120, PMAA_075290, PMAA_049510, PMAA_058480, PMAA_025700, PMAA_076380, PMAA_045900, PMAA_029990, PMAA_060150, PMAA_080130, PMAA_041320, PMAA_097290, PMAA_081680, PMAA_020890, PMAA_040500, PMAA_045600, PMAA_036400, PMAA_051100, PMAA_001470, PMAA_0420…
GO:0047462	phenylalanine racemase (ATP-hydrolyzing) activity	0.0126609	0.000164427	2	96	2	7448	0.03	0.06	PMAA_059970, PMAA_002930
GO:0016855	racemase and epimerase activity, acting on amino acids and derivatives	0.183609	0.00238454	2	96	6	7448	0.32	0.96	PMAA_059970, PMAA_002930
GO:0047661	amino-acid racemase activity	0.183609	0.00238454	2	96	6	7448	0.24	0.96	PMAA_059970, PMAA_002930

## Sheet: Cluster 4
Table S6. GO associations for phase-specific expression clusters.
Ontology Aspect: Process
GO ID	TERM	CORRECTED PVALUE	UNCORRECTED PVALUE	NUM LIST ANNOTATIONS	LIST SIZE	TOTAL NUM ANNOTATIONS	POPULATION SIZE	FDR RATE	EXPECTED FALSE POSITIVES	P. marneffei Gene Model ID
GO:0006323	DNA packaging	0.0678589	0.000270354	4	39	61	7448	0.16	0.16	PMAA_049350, PMAA_037440, PMAA_080560, PMAA_082150
GO:0071103	DNA conformation change	0.115264	0.000459219	4	39	70	7448	0.14	0.28	PMAA_049350, PMAA_037440, PMAA_080560, PMAA_082150
GO:0046483	heterocycle metabolic process	0.131589	0.00052426	9	39	465	7448	0.1	0.3	PMAA_049350, PMAA_041270, PMAA_037440, PMAA_084830, PMAA_042510, PMAA_021280, PMAA_015680, PMAA_057320, PMAA_044710

## Sheet: Cluster 5
Table S6. GO associations for phase-specific expression clusters.
Ontology Aspect: Process
GO ID	TERM	CORRECTED PVALUE	UNCORRECTED PVALUE	NUM LIST ANNOTATIONS	LIST SIZE	TOTAL NUM ANNOTATIONS	POPULATION SIZE	FDR RATE	EXPECTED FALSE POSITIVES	P. marneffei Gene Model ID
GO:0043941	positive regulation of sexual sporulation resulting in formation of a cellular spore	-	1.85787e-06	3	22	9	7448	0	0	PMAA_068430, PMAA_040210, PMAA_010380
GO:0075308	negative regulation of conidium formation	-	1.85787e-06	3	22	9	7448	0	0	PMAA_068430, PMAA_040210, PMAA_010380
GO:0034306	regulation of sexual sporulation	-	4.83797e-06	3	22	12	7448	0	0	PMAA_068430, PMAA_040210, PMAA_010380
GO:0043939	negative regulation of sporulation	-	4.83797e-06	3	22	12	7448	0	0	PMAA_068430, PMAA_040210, PMAA_010380
GO:0043940	regulation of sexual sporulation resulting in formation of a cellular spore	-	4.83797e-06	3	22	12	7448	0	0	PMAA_068430, PMAA_040210, PMAA_010380
GO:0051093	negative regulation of developmental process	-	6.27732e-06	3	22	13	7448	0	0	PMAA_068430, PMAA_040210, PMAA_010380
GO:2000243	positive regulation of reproductive process	-	7.97403e-06	3	22	14	7448	0	0	PMAA_068430, PMAA_040210, PMAA_010380
GO:0045597	positive regulation of cell differentiation	-	9.94846e-06	3	22	15	7448	0	0	PMAA_068430, PMAA_040210, PMAA_010380
GO:0045881	positive regulation of sporulation resulting in formation of a cellular spore	-	9.94846e-06	3	22	15	7448	0	0	PMAA_068430, PMAA_040210, PMAA_010380
GO:0043938	positive regulation of sporulation	-	2.46882e-05	3	22	20	7448	0	0	PMAA_068430, PMAA_040210, PMAA_010380
GO:0009637	response to blue light	-	2.49439e-05	2	22	3	7448	0	0	PMAA_068430, PMAA_040210
GO:0071483	cellular response to blue light	-	2.49439e-05	2	22	3	7448	0	0	PMAA_068430, PMAA_040210
GO:0042173	regulation of sporulation resulting in formation of a cellular spore	-	3.32233e-05	3	22	22	7448	0	0	PMAA_068430, PMAA_040210, PMAA_010380
GO:2000241	regulation of reproductive process	-	3.81337e-05	3	22	23	7448	0	0	PMAA_068430, PMAA_040210, PMAA_010380
GO:0045595	regulation of cell differentiation	-	4.3498e-05	3	22	24	7448	0	0	PMAA_068430, PMAA_040210, PMAA_010380
GO:0001678	cellular glucose homeostasis	-	4.97984e-05	2	22	4	7448	0	0	PMAA_068430, PMAA_040210
GO:0033500	carbohydrate homeostasis	-	4.97984e-05	2	22	4	7448	0	0	PMAA_068430, PMAA_040210
GO:0042593	glucose homeostasis	-	4.97984e-05	2	22	4	7448	0	0	PMAA_068430, PMAA_040210
GO:0071322	cellular response to carbohydrate stimulus	-	4.97984e-05	2	22	4	7448	0	0	PMAA_068430, PMAA_040210
GO:0071326	cellular response to monosaccharide stimulus	-	4.97984e-05	2	22	4	7448	0	0	PMAA_068430, PMAA_040210
GO:0071331	cellular response to hexose stimulus	-	4.97984e-05	2	22	4	7448	0	0	PMAA_068430, PMAA_040210
GO:0071333	cellular response to glucose stimulus	-	4.97984e-05	2	22	4	7448	0	0	PMAA_068430, PMAA_040210
GO:0075306	regulation of conidium formation	-	5.56632e-05	3	22	26	7448	0	0	PMAA_068430, PMAA_040210, PMAA_010380
GO:0009743	response to carbohydrate stimulus	-	8.28488e-05	2	22	5	7448	0.0008	0.02	PMAA_068430, PMAA_040210
GO:0009746	response to hexose stimulus	-	8.28488e-05	2	22	5	7448	0.0008	0.02	PMAA_068430, PMAA_040210
GO:0009749	response to glucose stimulus	-	8.28488e-05	2	22	5	7448	0.0008	0.02	PMAA_068430, PMAA_040210
GO:0010914	positive regulation of sterigmatocystin biosynthetic process	-	8.28488e-05	2	22	5	7448	0.0007	0.02	PMAA_068430, PMAA_040210
GO:0034284	response to monosaccharide stimulus	-	8.28488e-05	2	22	5	7448	0.0007	0.02	PMAA_068430, PMAA_040210
GO:1900378	positive regulation of secondary metabolite biosynthetic process	-	8.28488e-05	2	22	5	7448	0.0007	0.02	PMAA_068430, PMAA_040210
GO:0034305	regulation of asexual sporulation	-	9.53162e-05	3	22	31	7448	0.0007	0.02	PMAA_068430, PMAA_040210, PMAA_010380
GO:0033244	regulation of penicillin metabolic process	-	0.000124051	2	22	6	7448	0.0013	0.04	PMAA_068430, PMAA_040210
GO:0010913	regulation of sterigmatocystin biosynthetic process	-	0.00017336	2	22	7	7448	0.0031	0.1	PMAA_068430, PMAA_040210
GO:0043937	regulation of sporulation	-	0.000190846	3	22	39	7448	0.003	0.1	PMAA_068430, PMAA_040210, PMAA_010380
GO:0042762	regulation of sulfur metabolic process	-	0.000230733	2	22	8	7448	0.0029	0.1	PMAA_068430, PMAA_040210
GO:0051094	positive regulation of developmental process	-	0.000292941	3	22	45	7448	0.0029	0.1	PMAA_068430, PMAA_040210, PMAA_010380
GO:0034248	regulation of cellular amide metabolic process	-	0.000296126	2	22	9	7448	0.0028	0.1	PMAA_068430, PMAA_040210
GO:1900376	regulation of secondary metabolite biosynthetic process	-	0.000296126	2	22	9	7448	0.0027	0.1	PMAA_068430, PMAA_040210
GO:0048315	conidium formation	-	0.000425006	3	22	51	7448	0.0058	0.22	PMAA_068430, PMAA_040210, PMAA_010380
GO:0043455	regulation of secondary metabolic process	-	0.000450798	2	22	11	7448	0.0056	0.22	PMAA_068430, PMAA_040210
GO:0033238	regulation of cellular amine metabolic process	-	0.00053999	2	22	12	7448	0.008	0.32	PMAA_068430, PMAA_040210
GO:0045460	sterigmatocystin metabolic process	-	0.00053999	2	22	12	7448	0.0078	0.32	PMAA_068430, PMAA_040210
GO:0045461	sterigmatocystin biosynthetic process	-	0.00053999	2	22	12	7448	0.0076	0.32	PMAA_068430, PMAA_040210
GO:0071482	cellular response to light stimulus	-	0.000741871	2	22	14	7448	0.0098	0.42	PMAA_068430, PMAA_040210
GO:0071478	cellular response to radiation	-	0.000974796	2	22	16	7448	0.0114	0.5	PMAA_068430, PMAA_040210
GO:0009403	toxin biosynthetic process	-	0.00110279	2	22	17	7448	0.0124	0.56	PMAA_068430, PMAA_040210
GO:0009404	toxin metabolic process	-	0.00110279	2	22	17	7448	0.0122	0.56	PMAA_068430, PMAA_040210
GO:0030436	asexual sporulation	-	0.00136771	3	22	76	7448	0.0166	0.78	PMAA_068430, PMAA_040210, PMAA_010380
GO:0030653	beta-lactam antibiotic metabolic process	-	0.00138165	2	22	19	7448	0.0167	0.8	PMAA_068430, PMAA_040210
GO:0042316	penicillin metabolic process	-	0.00138165	2	22	19	7448	0.0163	0.8	PMAA_068430, PMAA_040210
GO:0072338	cellular lactam metabolic process	-	0.00138165	2	22	19	7448	0.016	0.8	PMAA_068430, PMAA_040210
GO:0009416	response to light stimulus	-	0.00153242	2	22	20	7448	0.0173	0.88	PMAA_068430, PMAA_040210
GO:0010565	regulation of cellular ketone metabolic process	-	0.00153242	2	22	20	7448	0.0169	0.88	PMAA_068430, PMAA_040210
GO:0016999	antibiotic metabolic process	-	0.00153242	2	22	20	7448	0.0166	0.88	PMAA_068430, PMAA_040210
GO:0017144	drug metabolic process	-	0.00153242	2	22	20	7448	0.0163	0.88	PMAA_068430, PMAA_040210
GO:0009314	response to radiation	-	0.00185645	2	22	22	7448	0.0171	0.94	PMAA_068430, PMAA_040210
GO:0022603	regulation of anatomical structure morphogenesis	-	0.00188881	3	22	85	7448	0.0168	0.94	PMAA_068430, PMAA_040210, PMAA_010380
GO:0034293	sexual sporulation	-	0.00188881	3	22	85	7448	0.0165	0.94	PMAA_068430, PMAA_040210, PMAA_010380
GO:0043935	sexual sporulation resulting in formation of a cellular spore	-	0.00188881	3	22	85	7448	0.0162	0.94	PMAA_068430, PMAA_040210, PMAA_010380
GO:0050793	regulation of developmental process	-	0.0022967	3	22	91	7448	0.0166	0.98	PMAA_068430, PMAA_040210, PMAA_010380
GO:0044550	secondary metabolite biosynthetic process	-	0.00259328	2	22	26	7448	0.018	1.08	PMAA_068430, PMAA_040210
GO:0019954	asexual reproduction	-	0.00267548	3	22	96	7448	0.018	1.1	PMAA_068430, PMAA_040210, PMAA_010380
GO:0071310	cellular response to organic substance	-	0.00322229	2	22	29	7448	0.0216	1.34	PMAA_068430, PMAA_040210
GO:0043603	cellular amide metabolic process	-	0.004672	2	22	35	7448	0.0343	2.16	PMAA_068430, PMAA_040210
GO:0030435	sporulation resulting in formation of a cellular spore	-	0.00502313	3	22	120	7448	0.035	2.24	PMAA_068430, PMAA_040210, PMAA_010380
GO:0030448	hyphal growth	-	0.00607024	2	22	40	7448	0.0403	2.62	PMAA_070190, PMAA_022840
GO:0030154	cell differentiation	-	0.00770551	3	22	140	7448	0.0458	3.02	PMAA_068430, PMAA_040210, PMAA_010380
GO:0003006	developmental process involved in reproduction	-	0.00816839	3	22	143	7448	0.0487	3.26	PMAA_068430, PMAA_040210, PMAA_010380
GO:0048646	anatomical structure formation involved in morphogenesis	-	0.00931174	3	22	150	7448	0.0526	3.58	PMAA_068430, PMAA_040210, PMAA_010380
GO:0044106	cellular amine metabolic process	-	0.00972986	2	22	51	7448	0.0554	3.82	PMAA_068430, PMAA_040210
GO:0043934	sporulation	-	0.0101834	3	22	155	7448	0.0557	3.9	PMAA_068430, PMAA_040210, PMAA_010380
GO:0019748	secondary metabolic process	-	0.0108621	2	22	54	7448	0.058	4.12	PMAA_068430, PMAA_040210
GO:0019953	sexual reproduction	-	0.0124657	3	22	167	7448	0.0625	4.5	PMAA_068430, PMAA_040210, PMAA_010380
GO:0009308	amine metabolic process	-	0.0137188	2	22	61	7448	0.0652	4.76	PMAA_068430, PMAA_040210
GO:0010033	response to organic substance	-	0.0159379	2	22	66	7448	0.0754	5.58	PMAA_068430, PMAA_040210
GO:0055082	cellular chemical homeostasis	-	0.0163991	2	22	67	7448	0.0763	5.72	PMAA_068430, PMAA_040210
GO:0048522	positive regulation of cellular process	-	0.0168803	3	22	187	7448	0.0789	6	PMAA_068430, PMAA_040210, PMAA_010380
GO:0071214	cellular response to abiotic stimulus	-	0.0173387	2	22	69	7448	0.0803	6.18	PMAA_068430, PMAA_040210
GO:0048878	chemical homeostasis	-	0.0183009	2	22	71	7448	0.0844	6.58	PMAA_068430, PMAA_040210
GO:0048869	cellular developmental process	-	0.0183561	3	22	193	7448	0.0838	6.62	PMAA_068430, PMAA_040210, PMAA_010380
GO:0048610	cellular process involved in reproduction	-	0.01964	3	22	198	7448	0.09	7.2	PMAA_068430, PMAA_040210, PMAA_010380
GO:0009653	anatomical structure morphogenesis	-	0.0204339	3	22	201	7448	0.0923	7.48	PMAA_068430, PMAA_040210, PMAA_010380
GO:XXXXXXX	unannotated	-	0.0204766	8	22	1238	7448	0.0915	7.5	PMAA_091960, PMAA_062740, PMAA_032450, PMAA_057360, PMAA_054200, PMAA_054370, PMAA_045960, PMAA_059560
GO:0048518	positive regulation of biological process	-	0.0207025	3	22	202	7448	0.0908	7.54	PMAA_068430, PMAA_040210, PMAA_010380
GO:0030447	filamentous growth	-	0.0208034	2	22	76	7448	0.0919	7.72	PMAA_070190, PMAA_022840
GO:0006790	sulfur compound metabolic process	-	0.0256462	2	22	85	7448	0.1075	9.14	PMAA_068430, PMAA_040210
GO:0022414	reproductive process	-	0.0280607	3	22	227	7448	0.1109	9.54	PMAA_068430, PMAA_040210, PMAA_010380
GO:0009891	positive regulation of biosynthetic process	-	0.0291066	2	22	91	7448	0.1131	9.84	PMAA_068430, PMAA_040210
GO:0031328	positive regulation of cellular biosynthetic process	-	0.0291066	2	22	91	7448	0.1118	9.84	PMAA_068430, PMAA_040210
GO:0019725	cellular homeostasis	-	0.0346276	2	22	100	7448	0.1238	11.02	PMAA_068430, PMAA_040210
GO:0040007	growth	-	0.0432618	2	22	113	7448	0.1404	12.64	PMAA_070190, PMAA_022840
GO:0009628	response to abiotic stimulus	-	0.0446557	2	22	115	7448	0.1431	13.02	PMAA_068430, PMAA_040210
GO:0048519	negative regulation of biological process	-	0.046062	3	22	276	7448	0.1452	13.36	PMAA_068430, PMAA_040210, PMAA_010380
GO:0031325	positive regulation of cellular metabolic process	-	0.0467781	2	22	118	7448	0.1471	13.68	PMAA_068430, PMAA_040210
GO:0009893	positive regulation of metabolic process	-	0.0474939	2	22	119	7448	0.1494	14.04	PMAA_068430, PMAA_040210
GO:0048856	anatomical structure development	-	0.048587	3	22	282	7448	0.1493	14.18	PMAA_068430, PMAA_040210, PMAA_010380
GO:0050794	regulation of cellular process	-	0.0551738	7	22	1218	7448	0.1644	15.78	PMAA_019260, PMAA_068430, PMAA_040210, PMAA_093380, PMAA_070190, PMAA_010380, PMAA_073640
GO:0042592	homeostatic process	-	0.0602658	2	22	136	7448	0.1777	17.24	PMAA_068430, PMAA_040210
GO:0000003	reproduction	-	0.0646627	3	22	317	7448	0.1804	17.68	PMAA_068430, PMAA_040210, PMAA_010380
GO:0006725	cellular aromatic compound metabolic process	-	0.0707488	2	22	149	7448	0.1915	18.96	PMAA_068430, PMAA_040210
GO:0051171	regulation of nitrogen compound metabolic process	-	0.0724139	5	22	779	7448	0.1922	19.22	PMAA_019260, PMAA_068430, PMAA_040210, PMAA_093380, PMAA_073640
GO:0032502	developmental process	-	0.0727538	3	22	333	7448	0.1911	19.3	PMAA_068430, PMAA_040210, PMAA_010380
GO:0050789	regulation of biological process	-	0.0747331	7	22	1302	7448	0.1939	19.78	PMAA_019260, PMAA_068430, PMAA_040210, PMAA_093380, PMAA_070190, PMAA_010380, PMAA_073640
GO:0070887	cellular response to chemical stimulus	-	0.0757789	2	22	155	7448	0.1959	20.18	PMAA_068430, PMAA_040210
GO:0009889	regulation of biosynthetic process	-	0.0780284	5	22	796	7448	0.1971	20.5	PMAA_019260, PMAA_068430, PMAA_040210, PMAA_093380, PMAA_073640
GO:0031326	regulation of cellular biosynthetic process	-	0.0780284	5	22	796	7448	0.1952	20.5	PMAA_019260, PMAA_068430, PMAA_040210, PMAA_093380, PMAA_073640
GO:0009058	biosynthetic process	-	0.0958991	9	22	1953	7448	0.2258	23.94	PMAA_019260, PMAA_068430, PMAA_040210, PMAA_093380, PMAA_022840, PMAA_073640, PMAA_054240, PMAA_041410, PMAA_021000
GO:0065007	biological regulation	-	0.0973032	7	22	1383	7448	0.2271	24.3	PMAA_019260, PMAA_068430, PMAA_040210, PMAA_093380, PMAA_070190, PMAA_010380, PMAA_073640
GO:0031323	regulation of cellular metabolic process	-	0.110918	5	22	884	7448	0.243	26.24	PMAA_019260, PMAA_068430, PMAA_040210, PMAA_093380, PMAA_073640
GO:0018130	heterocycle biosynthetic process	-	0.123612	2	22	207	7448	0.2576	28.08	PMAA_068430, PMAA_040210
GO:0019222	regulation of metabolic process	-	0.12881	5	22	926	7448	0.2598	28.58	PMAA_019260, PMAA_068430, PMAA_040210, PMAA_093380, PMAA_073640
GO:0007165	signal transduction	-	0.136544	2	22	220	7448	0.2724	30.24	PMAA_040210, PMAA_070190
GO:0023052	signaling	-	0.139573	2	22	223	7448	0.2734	30.62	PMAA_040210, PMAA_070190
GO:0042221	response to chemical stimulus	-	0.148752	2	22	232	7448	0.2788	31.5	PMAA_068430, PMAA_040210
GO:0006355	regulation of transcription, DNA-dependent	-	0.152185	4	22	711	7448	0.2811	32.04	PMAA_019260, PMAA_040210, PMAA_093380, PMAA_073640
GO:2001141	regulation of RNA biosynthetic process	-	0.152185	4	22	711	7448	0.2786	32.04	PMAA_019260, PMAA_040210, PMAA_093380, PMAA_073640
GO:0051252	regulation of RNA metabolic process	-	0.153874	4	22	714	7448	0.281	32.6	PMAA_019260, PMAA_040210, PMAA_093380, PMAA_073640
GO:0046483	heterocycle metabolic process	-	0.154883	3	22	465	7448	0.2803	32.8	PMAA_068430, PMAA_040210, PMAA_070190
GO:0065008	regulation of biological quality	-	0.15702	2	22	240	7448	0.2803	33.08	PMAA_068430, PMAA_040210
GO:0010468	regulation of gene expression	-	0.18617	4	22	769	7448	0.3092	36.8	PMAA_019260, PMAA_040210, PMAA_093380, PMAA_073640
GO:0019219	regulation of nucleobase-containing compound metabolic process	-	0.187389	4	22	771	7448	0.3082	36.98	PMAA_019260, PMAA_040210, PMAA_093380, PMAA_073640
GO:0010556	regulation of macromolecule biosynthetic process	-	0.194763	4	22	783	7448	0.3122	37.78	PMAA_019260, PMAA_040210, PMAA_093380, PMAA_073640
GO:2000112	regulation of cellular macromolecule biosynthetic process	-	0.194763	4	22	783	7448	0.3097	37.78	PMAA_019260, PMAA_040210, PMAA_093380, PMAA_073640

## Sheet: Cluster 6
Table S6. GO associations for phase-specific expression clusters.
Ontology Aspect: Process
GO ID	TERM	CORRECTED PVALUE	UNCORRECTED PVALUE	NUM LIST ANNOTATIONS	LIST SIZE	TOTAL NUM ANNOTATIONS	POPULATION SIZE	FDR RATE	EXPECTED FALSE POSITIVES	P. marneffei Gene Model ID
GO:XXXXXXX	unannotated	-	1.94718e-06	37	104	1238	7448	0	0	PMAA_074840, PMAA_037620, PMAA_036120, PMAA_091910, PMAA_078310, PMAA_002420, PMAA_072760, PMAA_040470, PMAA_088670, PMAA_031980, PMAA_058900, PMAA_066580, PMAA_047990, PMAA_000930, PMAA_091310, PMAA_070510, PMAA_102280, PMAA_066510, PMAA_040890, PMAA_019770, PMAA_054400, PMAA_080010, PMAA_071490, PMAA_051480, PMAA_004050, PMAA_033630, PMAA_084700, PMAA_028120, PMAA_102470, PMAA_079130, PMAA_0170…
GO:0042402	cellular biogenic amine catabolic process	-	0.00113772	2	104	4	7448	0.54	1.08	PMAA_097060, PMAA_039450
GO:0009310	amine catabolic process	-	0.00187892	2	104	5	7448	0.6067	1.82	PMAA_097060, PMAA_039450
GO:0030968	endoplasmic reticulum unfolded protein response	-	0.00187892	2	104	5	7448	0.455	1.82	PMAA_040090, PMAA_008830
GO:0034620	cellular response to unfolded protein	-	0.00187892	2	104	5	7448	0.364	1.82	PMAA_040090, PMAA_008830
GO:0006984	ER-nucleus signaling pathway	-	0.00279273	2	104	6	7448	0.44	2.64	PMAA_040090, PMAA_008830
GO:0034976	response to endoplasmic reticulum stress	-	0.00279273	2	104	6	7448	0.3771	2.64	PMAA_040090, PMAA_008830
GO:0009063	cellular amino acid catabolic process	-	0.00344464	4	104	45	7448	0.3625	2.9	PMAA_031950, PMAA_016000, PMAA_028730, PMAA_097060
GO:0015074	DNA integration	-	0.00404048	7	104	145	7448	0.4	3.6	PMAA_076660, PMAA_038970, PMAA_090390, PMAA_015260, PMAA_037580, PMAA_007590, PMAA_006540
GO:0006986	response to unfolded protein	-	0.00511876	2	104	8	7448	0.44	4.4	PMAA_040090, PMAA_008830
GO:0035967	cellular response to topologically incorrect protein	-	0.00807803	2	104	10	7448	0.6145	6.76	PMAA_040090, PMAA_008830
GO:0009074	aromatic amino acid family catabolic process	-	0.0136254	2	104	13	7448	0.8783	10.54	PMAA_031950, PMAA_097060
GO:0035966	response to topologically incorrect protein	-	0.0136254	2	104	13	7448	0.8108	10.54	PMAA_040090, PMAA_008830
GO:0016054	organic acid catabolic process	-	0.0147568	4	104	68	7448	0.8029	11.24	PMAA_031950, PMAA_016000, PMAA_028730, PMAA_097060
GO:0046395	carboxylic acid catabolic process	-	0.0147568	4	104	68	7448	0.7493	11.24	PMAA_031950, PMAA_016000, PMAA_028730, PMAA_097060
GO:0019439	aromatic compound catabolic process	-	0.0204003	2	104	16	7448	0.8875	14.2	PMAA_031950, PMAA_097060
GO:0044282	small molecule catabolic process	-	0.026297	4	104	81	7448	1	17	PMAA_031950, PMAA_016000, PMAA_028730, PMAA_097060
GO:0006576	cellular biogenic amine metabolic process	-	0.0470342	2	104	25	7448	1	18	PMAA_097060, PMAA_039450
GO:0009308	amine metabolic process	-	0.0531664	3	104	61	7448	1	19	PMAA_097060, PMAA_043430, PMAA_039450
GO:0071310	cellular response to organic substance	-	0.0614194	2	104	29	7448	1	20	PMAA_040090, PMAA_008830
GO:0008202	steroid metabolic process	-	0.0667141	3	104	67	7448	1	21	PMAA_024520, PMAA_002910, PMAA_004490
GO:0006470	protein dephosphorylation	-	0.0691039	2	104	31	7448	1	22	PMAA_040090, PMAA_094890
GO:0000096	sulfur amino acid metabolic process	-	0.0811805	2	104	34	7448	1	23	PMAA_016000, PMAA_024760
GO:0007165	signal transduction	-	0.0868445	6	104	220	7448	1	24	PMAA_040090, PMAA_022080, PMAA_074240, PMAA_079340, PMAA_008830, PMAA_093920
GO:0023052	signaling	-	0.0912625	6	104	223	7448	1	25	PMAA_040090, PMAA_022080, PMAA_074240, PMAA_079340, PMAA_008830, PMAA_093920
GO:0006915	apoptotic process	-	0.0938518	2	104	37	7448	1	26	PMAA_102650, PMAA_008830
GO:0012501	programmed cell death	-	0.0938518	2	104	37	7448	1	27	PMAA_102650, PMAA_008830
GO:0007047	cellular cell wall organization	-	0.0951503	3	104	78	7448	1	28	PMAA_078940, PMAA_035260, PMAA_008830
GO:0045229	external encapsulating structure organization	-	0.0951503	3	104	78	7448	1	29	PMAA_078940, PMAA_035260, PMAA_008830
GO:0071555	cell wall organization	-	0.100781	3	104	80	7448	1	30	PMAA_078940, PMAA_035260, PMAA_008830
GO:0008219	cell death	-	0.107049	2	104	40	7448	1	31	PMAA_102650, PMAA_008830
GO:0016265	death	-	0.107049	2	104	40	7448	1	32	PMAA_102650, PMAA_008830
GO:0016125	sterol metabolic process	-	0.111554	2	104	41	7448	1	33	PMAA_024520, PMAA_002910
GO:0009072	aromatic amino acid family metabolic process	-	0.130042	2	104	45	7448	1	34	PMAA_031950, PMAA_097060
GO:0006629	lipid metabolic process	-	0.150404	7	104	315	7448	1	35	PMAA_024520, PMAA_022080, PMAA_005580, PMAA_002910, PMAA_040700, PMAA_004490, PMAA_053530
GO:0009064	glutamine family amino acid metabolic process	-	0.158951	2	104	51	7448	1	36	PMAA_028730, PMAA_039450
GO:0044106	cellular amine metabolic process	-	0.158951	2	104	51	7448	1	37	PMAA_097060, PMAA_039450
GO:0006520	cellular amino acid metabolic process	-	0.168192	7	104	325	7448	1	38	PMAA_046930, PMAA_031950, PMAA_016000, PMAA_028730, PMAA_097060, PMAA_024760, PMAA_039450
GO:0003333	amino acid transmembrane transport	-	0.16884	2	104	53	7448	1	39	PMAA_065470, PMAA_094330
GO:0016311	dephosphorylation	-	0.173823	2	104	54	7448	1	40	PMAA_040090, PMAA_094890
GO:0031505	fungal-type cell wall organization	-	0.193982	2	104	58	7448	1	41	PMAA_035260, PMAA_008830
GO:0070882	cellular cell wall organization or biogenesis	-	0.194913	3	104	109	7448	1	42	PMAA_078940, PMAA_035260, PMAA_008830
GO:0019752	carboxylic acid metabolic process	-	0.197031	9	104	463	7448	1	43	PMAA_097060, PMAA_024760, PMAA_005610, PMAA_016000, PMAA_031950, PMAA_046930, PMAA_028730, PMAA_039450, PMAA_005580
GO:0043436	oxoacid metabolic process	-	0.197031	9	104	463	7448	1	44	PMAA_097060, PMAA_024760, PMAA_005610, PMAA_016000, PMAA_031950, PMAA_046930, PMAA_028730, PMAA_039450, PMAA_005580
GO:0006278	RNA-dependent DNA replication	-	0.19907	2	104	59	7448	1	45	PMAA_082600, PMAA_007590
Ontology Aspect: Function
GO ID	TERM	CORRECTED PVALUE	UNCORRECTED PVALUE	NUM LIST ANNOTATIONS	LIST SIZE	TOTAL NUM ANNOTATIONS	POPULATION SIZE	FDR RATE	EXPECTED FALSE POSITIVES	P. marneffei Gene Model ID
GO:XXXXXXX	unannotated	-	4.1133e-08	35	104	969	7448	0	0	PMAA_074840, PMAA_037620, PMAA_036120, PMAA_091910, PMAA_078310, PMAA_002420, PMAA_020600, PMAA_072760, PMAA_040470, PMAA_088670, PMAA_031980, PMAA_058900, PMAA_066580, PMAA_047990, PMAA_000930, PMAA_091310, PMAA_102280, PMAA_022080, PMAA_040890, PMAA_019770, PMAA_054400, PMAA_080010, PMAA_071490, PMAA_051480, PMAA_033630, PMAA_079340, PMAA_028120, PMAA_092380, PMAA_079130, PMAA_017080, PMAA_0098…
GO:0004316	3-oxoacyl-[acyl-carrier-protein] reductase (NADPH) activity	-	0.0116343	2	104	12	7448	1	2	PMAA_005580, PMAA_065580
GO:0004722	protein serine/threonine phosphatase activity	-	0.0229123	2	104	17	7448	1	3	PMAA_094890, PMAA_041070
GO:0004721	phosphoprotein phosphatase activity	-	0.0231556	3	104	44	7448	1	4	PMAA_040090, PMAA_094890, PMAA_041070
GO:0004312	fatty acid synthase activity	-	0.0341268	2	104	21	7448	1	5	PMAA_005580, PMAA_065580
GO:0016638	oxidoreductase activity, acting on the CH-NH2 group of donors	-	0.0372037	2	104	22	7448	1	6	PMAA_028730, PMAA_043430
GO:0016891	endoribonuclease activity, producing 5'-phosphomonoesters	-	0.039265	3	104	54	7448	1	7	PMAA_082600, PMAA_008830, PMAA_066500
GO:0016893	endonuclease activity, active with either ribo- or deoxyribonucleic acids and producing 5'-phosphomonoesters	-	0.0489805	3	104	59	7448	1	8	PMAA_082600, PMAA_008830, PMAA_066500
GO:0008422	beta-glucosidase activity	-	0.0504999	2	104	26	7448	1	9	PMAA_017430, PMAA_078940
GO:0004521	endoribonuclease activity	-	0.0510524	3	104	60	7448	1	10	PMAA_082600, PMAA_008830, PMAA_066500
GO:0005507	copper ion binding	-	0.0652231	2	104	30	7448	1	11	PMAA_043430, PMAA_057450
GO:0016788	hydrolase activity, acting on ester bonds	-	0.0700439	9	104	367	7448	1	12	PMAA_040090, PMAA_005580, PMAA_094890, PMAA_082600, PMAA_041070, PMAA_008830, PMAA_045180, PMAA_053530, PMAA_066500
GO:0003774	motor activity	-	0.0730589	2	104	32	7448	1	13	PMAA_102650, PMAA_035260
GO:0004518	nuclease activity	-	0.103619	4	104	128	7448	1	14	PMAA_082600, PMAA_008830, PMAA_045180, PMAA_066500
GO:0004540	ribonuclease activity	-	0.103646	3	104	81	7448	1	15	PMAA_082600, PMAA_008830, PMAA_066500
GO:0042578	phosphoric ester hydrolase activity	-	0.117307	4	104	134	7448	1	16	PMAA_040090, PMAA_094890, PMAA_041070, PMAA_053530
GO:0015926	glucosidase activity	-	0.125354	2	104	44	7448	1	17	PMAA_017430, PMAA_078940
GO:0016627	oxidoreductase activity, acting on the CH-CH group of donors	-	0.127679	3	104	89	7448	1	18	PMAA_024520, PMAA_005580, PMAA_040700
GO:0016903	oxidoreductase activity, acting on the aldehyde or oxo group of donors	-	0.130042	2	104	45	7448	1	19	PMAA_100150, PMAA_005610
GO:0004519	endonuclease activity	-	0.130814	3	104	90	7448	1	20	PMAA_082600, PMAA_008830, PMAA_066500
GO:0003677	DNA binding	-	0.141077	16	104	860	7448	1	21	PMAA_006540, PMAA_016000, PMAA_087990, PMAA_084700, PMAA_045180, PMAA_037580, PMAA_038970, PMAA_015260, PMAA_076660, PMAA_070510, PMAA_090390, PMAA_000780, PMAA_007590, PMAA_066510, PMAA_013650, PMAA_066500
GO:0016791	phosphatase activity	-	0.150177	3	104	96	7448	1	22	PMAA_040090, PMAA_094890, PMAA_041070
GO:0008238	exopeptidase activity	-	0.158951	2	104	51	7448	1	23	PMAA_016000, PMAA_084770
GO:0046872	metal ion binding	-	0.162594	25	104	1471	7448	1	24	PMAA_063000, PMAA_025880, PMAA_018640, PMAA_015360, PMAA_016130, PMAA_031950, PMAA_087990, PMAA_082600, PMAA_035040, PMAA_035260, PMAA_102310, PMAA_075990, PMAA_017130, PMAA_024760, PMAA_043430, PMAA_015260, PMAA_065590, PMAA_040300, PMAA_076660, PMAA_005580, PMAA_070510, PMAA_066510, PMAA_007590, PMAA_013650, PMAA_057450
GO:0016702	oxidoreductase activity, acting on single donors with incorporation of molecular oxygen, incorporation of two atoms of oxygen	-	0.163882	2	104	52	7448	1	25	PMAA_031950, PMAA_024760
GO:0003964	RNA-directed DNA polymerase activity	-	0.178831	2	104	55	7448	1	26	PMAA_082600, PMAA_007590
GO:0016746	transferase activity, transferring acyl groups	-	0.179021	5	104	214	7448	1	27	PMAA_005580, PMAA_065580, PMAA_040700, PMAA_066490, PMAA_058520
GO:0016787	hydrolase activity	-	0.179544	26	104	1557	7448	1	28	PMAA_040090, PMAA_092640, PMAA_074240, PMAA_053000, PMAA_017430, PMAA_015360, PMAA_016000, PMAA_081560, PMAA_078940, PMAA_094890, PMAA_084700, PMAA_082600, PMAA_045180, PMAA_035260, PMAA_102310, PMAA_093920, PMAA_102650, PMAA_097060, PMAA_008830, PMAA_040300, PMAA_005580, PMAA_028110, PMAA_041070, PMAA_084770, PMAA_053530, PMAA_066500
GO:0043167	ion binding	-	0.183203	26	104	1561	7448	1	29	PMAA_063000, PMAA_025880, PMAA_018640, PMAA_015360, PMAA_016130, PMAA_031950, PMAA_087990, PMAA_078940, PMAA_082600, PMAA_035040, PMAA_035260, PMAA_102310, PMAA_075990, PMAA_017130, PMAA_024760, PMAA_043430, PMAA_015260, PMAA_065590, PMAA_040300, PMAA_076660, PMAA_005580, PMAA_070510, PMAA_066510, PMAA_007590, PMAA_057450, PMAA_013650
GO:0043169	cation binding	-	0.183203	26	104	1561	7448	1	30	PMAA_063000, PMAA_025880, PMAA_018640, PMAA_015360, PMAA_016130, PMAA_031950, PMAA_087990, PMAA_078940, PMAA_082600, PMAA_035040, PMAA_035260, PMAA_102310, PMAA_075990, PMAA_017130, PMAA_024760, PMAA_043430, PMAA_015260, PMAA_065590, PMAA_040300, PMAA_076660, PMAA_005580, PMAA_070510, PMAA_066510, PMAA_007590, PMAA_057450, PMAA_013650
GO:0015171	amino acid transmembrane transporter activity	-	0.188912	2	104	57	7448	1	31	PMAA_065470, PMAA_094330
GO:0005506	iron ion binding	-	0.193376	5	104	220	7448	1	32	PMAA_024760, PMAA_035260, PMAA_025880, PMAA_065590, PMAA_018640
GO:0017111	nucleoside-triphosphatase activity	-	0.193699	9	104	461	7448	1	33	PMAA_074240, PMAA_053000, PMAA_102650, PMAA_084700, PMAA_035260, PMAA_028110, PMAA_102310, PMAA_040300, PMAA_015360
GO:0000287	magnesium ion binding	-	0.193982	2	104	58	7448	1	34	PMAA_005580, PMAA_035040
GO:0016628	oxidoreductase activity, acting on the CH-CH group of donors, NAD or NADP as acceptor	-	0.193982	2	104	58	7448	0.9834	34.42	PMAA_024520, PMAA_005580
GO:0016701	oxidoreductase activity, acting on single donors with incorporation of molecular oxygen	-	0.193982	2	104	58	7448	0.9561	34.42	PMAA_031950, PMAA_024760
