# Supplementary material for: Cell-Type–Specific Transcriptional Profiles of the Dimorphic Pathogen Penicillium marneffei Reflect Distinct Reproductive, Morphological, and Environmental Demands
Source: G3 (Bethesda). 2013 Nov 1;3(11):1997–2014. doi: 10.1534/g3.113.006809 (PMC3815061; doi:10.1534/g3.113.006809)
Supplement: Supporting Information [file supp_g3.113.006809_TableS7.xls]

## Sheet: Cluster 1
Table S7. GO associations for early and late expression clusters.
Ontology Aspect: Process
GO ID	TERM	CORRECTED PVALUE	UNCORRECTED PVALUE	NUM LIST ANNOTATIONS	LIST SIZE	TOTAL NUM ANNOTATIONS	POPULATION SIZE	FDR RATE	EXPECTED FALSE POSITIVES	P. marneffei Gene Model ID
GO:XXXXXXX	unannotated	-	0.000130141	47	168	1238	7448	0.08	0.08	PMAA_039930, PMAA_035470, PMAA_014440, PMAA_091960, PMAA_099880, PMAA_073320, PMAA_059830, PMAA_028140, PMAA_078660, PMAA_001740, PMAA_007740, PMAA_056390, PMAA_050700, PMAA_041190, PMAA_065170, PMAA_041330, PMAA_063100, PMAA_040070, PMAA_056120, PMAA_059560, PMAA_039640, PMAA_093360, PMAA_058480, PMAA_091660, PMAA_045900, PMAA_084300, PMAA_029990, PMAA_060150, PMAA_080130, PMAA_040020, PMAA_0102…
GO:0003006	developmental process involved in reproduction	-	0.000365206	11	168	143	7448	0.11	0.22	PMAA_068430, PMAA_040210, PMAA_041990, PMAA_041520, PMAA_054460, PMAA_067490, PMAA_088690, PMAA_055990, PMAA_081680, PMAA_009130, PMAA_070290
GO:0015669	gas transport	-	0.00050583	2	168	2	7448	0.1733	0.52	PMAA_055410, PMAA_088690
GO:0015671	oxygen transport	-	0.00050583	2	168	2	7448	0.13	0.52	PMAA_055410, PMAA_088690
GO:0006091	generation of precursor metabolites and energy	-	0.000562341	10	168	127	7448	0.104	0.52	PMAA_089220, PMAA_012920, PMAA_098380, PMAA_071630, PMAA_028330, PMAA_064600, PMAA_055990, PMAA_024900, PMAA_032300, PMAA_028880
GO:0043938	positive regulation of sporulation	-	0.000912324	4	168	20	7448	0.16	0.96	PMAA_081680, PMAA_068430, PMAA_040210, PMAA_070290
GO:0042173	regulation of sporulation resulting in formation of a cellular spore	-	0.00132983	4	168	22	7448	0.18	1.26	PMAA_068430, PMAA_040210, PMAA_070290, PMAA_088690
GO:0009637	response to blue light	-	0.00149494	2	168	3	7448	0.2125	1.7	PMAA_068430, PMAA_040210
GO:0071483	cellular response to blue light	-	0.00149494	2	168	3	7448	0.1889	1.7	PMAA_068430, PMAA_040210
GO:0030435	sporulation resulting in formation of a cellular spore	-	0.00149719	9	168	120	7448	0.17	1.7	PMAA_068430, PMAA_040210, PMAA_041520, PMAA_054460, PMAA_067490, PMAA_088690, PMAA_055990, PMAA_081680, PMAA_070290
GO:2000241	regulation of reproductive process	-	0.00158176	4	168	23	7448	0.16	1.76	PMAA_068430, PMAA_040210, PMAA_070290, PMAA_088690
GO:0043937	regulation of sporulation	-	0.00170262	5	168	39	7448	0.1517	1.82	PMAA_081680, PMAA_068430, PMAA_040210, PMAA_070290, PMAA_088690
GO:0045595	regulation of cell differentiation	-	0.00186508	4	168	24	7448	0.1477	1.92	PMAA_068430, PMAA_040210, PMAA_070290, PMAA_088690
GO:0048646	anatomical structure formation involved in morphogenesis	-	0.0020178	10	168	150	7448	0.1414	1.98	PMAA_068430, PMAA_040210, PMAA_041520, PMAA_054460, PMAA_067490, PMAA_088690, PMAA_055990, PMAA_081680, PMAA_070290, PMAA_083630
GO:0034306	regulation of sexual sporulation	-	0.00213486	3	168	12	7448	0.1427	2.14	PMAA_068430, PMAA_040210, PMAA_088690
GO:0043939	negative regulation of sporulation	-	0.00213486	3	168	12	7448	0.1338	2.14	PMAA_068430, PMAA_040210, PMAA_088690
GO:0043940	regulation of sexual sporulation resulting in formation of a cellular spore	-	0.00213486	3	168	12	7448	0.1259	2.14	PMAA_068430, PMAA_040210, PMAA_088690
GO:0045460	sterigmatocystin metabolic process	-	0.00213486	3	168	12	7448	0.1189	2.14	PMAA_068430, PMAA_040210, PMAA_088690
GO:0045461	sterigmatocystin biosynthetic process	-	0.00213486	3	168	12	7448	0.1126	2.14	PMAA_068430, PMAA_040210, PMAA_088690
GO:0018130	heterocycle biosynthetic process	-	0.00243018	12	168	207	7448	0.113	2.26	PMAA_071690, PMAA_068430, PMAA_040210, PMAA_041990, PMAA_092050, PMAA_088690, PMAA_084830, PMAA_028960, PMAA_042510, PMAA_032300, PMAA_015680, PMAA_032960
GO:0075306	regulation of conidium formation	-	0.00253359	4	168	26	7448	0.1095	2.3	PMAA_081680, PMAA_068430, PMAA_040210, PMAA_070290
GO:0043934	sporulation	-	0.00256949	10	168	155	7448	0.1045	2.3	PMAA_068430, PMAA_040210, PMAA_041520, PMAA_054460, PMAA_067490, PMAA_088690, PMAA_055990, PMAA_081680, PMAA_070290, PMAA_083630
GO:0051093	negative regulation of developmental process	-	0.00272962	3	168	13	7448	0.1052	2.42	PMAA_068430, PMAA_040210, PMAA_088690
GO:0001678	cellular glucose homeostasis	-	0.00294552	2	168	4	7448	0.1342	3.22	PMAA_068430, PMAA_040210
GO:0019684	photosynthesis, light reaction	-	0.00294552	2	168	4	7448	0.1288	3.22	PMAA_028330, PMAA_064600
GO:0033500	carbohydrate homeostasis	-	0.00294552	2	168	4	7448	0.1238	3.22	PMAA_068430, PMAA_040210
GO:0042593	glucose homeostasis	-	0.00294552	2	168	4	7448	0.1193	3.22	PMAA_068430, PMAA_040210
GO:0071322	cellular response to carbohydrate stimulus	-	0.00294552	2	168	4	7448	0.115	3.22	PMAA_068430, PMAA_040210
GO:0071326	cellular response to monosaccharide stimulus	-	0.00294552	2	168	4	7448	0.111	3.22	PMAA_068430, PMAA_040210
GO:0071331	cellular response to hexose stimulus	-	0.00294552	2	168	4	7448	0.1073	3.22	PMAA_068430, PMAA_040210
GO:0071333	cellular response to glucose stimulus	-	0.00294552	2	168	4	7448	0.1039	3.22	PMAA_068430, PMAA_040210
GO:0034293	sexual sporulation	-	0.00295473	7	168	85	7448	0.1025	3.28	PMAA_055990, PMAA_068430, PMAA_040210, PMAA_041520, PMAA_054460, PMAA_067490, PMAA_088690
GO:0043935	sexual sporulation resulting in formation of a cellular spore	-	0.00295473	7	168	85	7448	0.0994	3.28	PMAA_055990, PMAA_068430, PMAA_040210, PMAA_041520, PMAA_054460, PMAA_067490, PMAA_088690
GO:0032535	regulation of cellular component size	-	0.00335049	4	168	28	7448	0.1006	3.42	PMAA_051360, PMAA_005360, PMAA_067490, PMAA_084280
GO:0090066	regulation of anatomical structure size	-	0.00335049	4	168	28	7448	0.0977	3.42	PMAA_051360, PMAA_005360, PMAA_067490, PMAA_084280
GO:2000243	positive regulation of reproductive process	-	0.00341692	3	168	14	7448	0.1033	3.72	PMAA_068430, PMAA_040210, PMAA_070290
GO:0045597	positive regulation of cell differentiation	-	0.00420097	3	168	15	7448	0.1135	4.2	PMAA_068430, PMAA_040210, PMAA_070290
GO:0045881	positive regulation of sporulation resulting in formation of a cellular spore	-	0.00420097	3	168	15	7448	0.1105	4.2	PMAA_068430, PMAA_040210, PMAA_070290
GO:0030154	cell differentiation	-	0.00427662	9	168	140	7448	0.1077	4.2	PMAA_068430, PMAA_040210, PMAA_041520, PMAA_054460, PMAA_067490, PMAA_088690, PMAA_055990, PMAA_081680, PMAA_070290
GO:0019953	sexual reproduction	-	0.00439427	10	168	167	7448	0.1055	4.22	PMAA_068430, PMAA_040210, PMAA_041990, PMAA_041520, PMAA_054460, PMAA_067490, PMAA_088690, PMAA_055990, PMAA_009130, PMAA_083630
GO:0009743	response to carbohydrate stimulus	-	0.00483649	2	168	5	7448	0.1205	4.94	PMAA_068430, PMAA_040210
GO:0009746	response to hexose stimulus	-	0.00483649	2	168	5	7448	0.1176	4.94	PMAA_068430, PMAA_040210
GO:0009749	response to glucose stimulus	-	0.00483649	2	168	5	7448	0.1149	4.94	PMAA_068430, PMAA_040210
GO:0010914	positive regulation of sterigmatocystin biosynthetic process	-	0.00483649	2	168	5	7448	0.1123	4.94	PMAA_068430, PMAA_040210
GO:0034284	response to monosaccharide stimulus	-	0.00483649	2	168	5	7448	0.1098	4.94	PMAA_068430, PMAA_040210
GO:1900378	positive regulation of secondary metabolite biosynthetic process	-	0.00483649	2	168	5	7448	0.1074	4.94	PMAA_068430, PMAA_040210
GO:0034305	regulation of asexual sporulation	-	0.00488585	4	168	31	7448	0.1077	5.06	PMAA_081680, PMAA_068430, PMAA_040210, PMAA_070290
GO:0048315	conidium formation	-	0.00559182	5	168	51	7448	0.1138	5.46	PMAA_081680, PMAA_068430, PMAA_040210, PMAA_070290, PMAA_083630
GO:0009403	toxin biosynthetic process	-	0.00607408	3	168	17	7448	0.1167	5.72	PMAA_068430, PMAA_040210, PMAA_088690
GO:0009404	toxin metabolic process	-	0.00607408	3	168	17	7448	0.1144	5.72	PMAA_068430, PMAA_040210, PMAA_088690
GO:0033244	regulation of penicillin metabolic process	-	0.00714749	2	168	6	7448	0.131	6.68	PMAA_068430, PMAA_040210
GO:0000916	actomyosin contractile ring contraction	-	0.00716952	3	168	18	7448	0.1358	7.06	PMAA_055990, PMAA_051360, PMAA_031100
GO:0036213	contractile ring contraction	-	0.00716952	3	168	18	7448	0.1332	7.06	PMAA_055990, PMAA_051360, PMAA_031100
GO:0006915	apoptotic process	-	0.0092376	4	168	37	7448	0.1478	7.98	PMAA_045500, PMAA_024900, PMAA_071070, PMAA_019390
GO:0012501	programmed cell death	-	0.0092376	4	168	37	7448	0.1451	7.98	PMAA_045500, PMAA_024900, PMAA_071070, PMAA_019390
GO:0022900	electron transport chain	-	0.00969139	3	168	20	7448	0.1471	8.24	PMAA_098380, PMAA_071630, PMAA_032300
GO:0010913	regulation of sterigmatocystin biosynthetic process	-	0.00985883	2	168	7	7448	0.1656	9.44	PMAA_068430, PMAA_040210
GO:0015979	photosynthesis	-	0.00985883	2	168	7	7448	0.1628	9.44	PMAA_028330, PMAA_064600
GO:0043945	positive regulation of asexual sporulation resulting in formation of a cellular spore	-	0.00985883	2	168	7	7448	0.16	9.44	PMAA_068430, PMAA_070290
GO:0048856	anatomical structure development	-	0.0111127	13	168	282	7448	0.169	10.14	PMAA_068430, PMAA_040210, PMAA_041990, PMAA_041520, PMAA_054460, PMAA_067490, PMAA_088690, PMAA_055990, PMAA_081680, PMAA_070290, PMAA_009130, PMAA_055410, PMAA_083630
GO:0008219	cell death	-	0.0121339	4	168	40	7448	0.1725	10.52	PMAA_045500, PMAA_024900, PMAA_071070, PMAA_019390
GO:0016265	death	-	0.0121339	4	168	40	7448	0.1697	10.52	PMAA_045500, PMAA_024900, PMAA_071070, PMAA_019390
GO:0042762	regulation of sulfur metabolic process	-	0.0129515	2	168	8	7448	0.1889	11.9	PMAA_068430, PMAA_040210
GO:0075307	positive regulation of conidium formation	-	0.0129515	2	168	8	7448	0.1859	11.9	PMAA_081680, PMAA_070290
GO:0022414	reproductive process	-	0.0134668	11	168	227	7448	0.1874	12.18	PMAA_068430, PMAA_040210, PMAA_041990, PMAA_041520, PMAA_054460, PMAA_067490, PMAA_088690, PMAA_055990, PMAA_081680, PMAA_009130, PMAA_070290
GO:0006887	exocytosis	-	0.0143312	3	168	23	7448	0.1909	12.6	PMAA_054570, PMAA_021140, PMAA_014380
GO:0009653	anatomical structure morphogenesis	-	0.0153199	10	168	201	7448	0.1934	12.96	PMAA_068430, PMAA_040210, PMAA_041520, PMAA_054460, PMAA_067490, PMAA_088690, PMAA_055990, PMAA_081680, PMAA_070290, PMAA_083630
GO:0030163	protein catabolic process	-	0.0153517	8	168	143	7448	0.1909	12.98	PMAA_041170, PMAA_041520, PMAA_029640, PMAA_085430, PMAA_069820, PMAA_085050, PMAA_039810, PMAA_099540
GO:0071702	organic substance transport	-	0.0161348	9	168	173	7448	0.1936	13.36	PMAA_021140, PMAA_092720, PMAA_049550, PMAA_049040, PMAA_009630, PMAA_047000, PMAA_011150, PMAA_094330, PMAA_052210
GO:0034248	regulation of cellular amide metabolic process	-	0.0164071	2	168	9	7448	0.2086	14.6	PMAA_068430, PMAA_040210
GO:0043941	positive regulation of sexual sporulation resulting in formation of a cellular spore	-	0.0164071	2	168	9	7448	0.2056	14.6	PMAA_068430, PMAA_040210
GO:0075308	negative regulation of conidium formation	-	0.0164071	2	168	9	7448	0.2028	14.6	PMAA_068430, PMAA_040210
GO:1900376	regulation of secondary metabolite biosynthetic process	-	0.0164071	2	168	9	7448	0.2	14.6	PMAA_068430, PMAA_040210
GO:0046483	heterocycle metabolic process	-	0.0169805	18	168	465	7448	0.2016	14.92	PMAA_071690, PMAA_060250, PMAA_068430, PMAA_040210, PMAA_041990, PMAA_092050, PMAA_037440, PMAA_067490, PMAA_088690, PMAA_084830, PMAA_073270, PMAA_070190, PMAA_028960, PMAA_042510, PMAA_032300, PMAA_057320, PMAA_015680, PMAA_032960
GO:0032502	developmental process	-	0.0180042	14	168	333	7448	0.2045	15.34	PMAA_068430, PMAA_040210, PMAA_041990, PMAA_041520, PMAA_054460, PMAA_067490, PMAA_088690, PMAA_055990, PMAA_081680, PMAA_070290, PMAA_009130, PMAA_055410, PMAA_083630, PMAA_094610
GO:0051094	positive regulation of developmental process	-	0.0181423	4	168	45	7448	0.2089	15.88	PMAA_081680, PMAA_068430, PMAA_040210, PMAA_070290
GO:0044550	secondary metabolite biosynthetic process	-	0.0200305	3	168	26	7448	0.2216	17.06	PMAA_068430, PMAA_040210, PMAA_088690
GO:0008361	regulation of cell size	-	0.0202079	2	168	10	7448	0.2303	17.96	PMAA_005360, PMAA_084280
GO:0043943	regulation of asexual sporulation resulting in formation of a cellular spore	-	0.0202079	2	168	10	7448	0.2273	17.96	PMAA_068430, PMAA_070290
GO:0015980	energy derivation by oxidation of organic compounds	-	0.0204945	5	168	70	7448	0.2257	18.06	PMAA_055990, PMAA_089220, PMAA_012920, PMAA_098380, PMAA_024900
GO:0032940	secretion by cell	-	0.022169	3	168	27	7448	0.2321	18.8	PMAA_054570, PMAA_021140, PMAA_014380
GO:0046903	secretion	-	0.022169	3	168	27	7448	0.2293	18.8	PMAA_054570, PMAA_021140, PMAA_014380
GO:0006897	endocytosis	-	0.022498	4	168	48	7448	0.2277	18.9	PMAA_021140, PMAA_005360, PMAA_067490, PMAA_039810
GO:0006783	heme biosynthetic process	-	0.0243368	2	168	11	7448	0.2426	20.38	PMAA_084830, PMAA_032300
GO:0043455	regulation of secondary metabolic process	-	0.0243368	2	168	11	7448	0.2398	20.38	PMAA_068430, PMAA_040210
GO:0051248	negative regulation of protein metabolic process	-	0.0244272	3	168	28	7448	0.2395	20.6	PMAA_055990, PMAA_085050, PMAA_082150
GO:0044271	cellular nitrogen compound biosynthetic process	-	0.0254032	10	168	218	7448	0.2386	20.76	PMAA_071690, PMAA_041990, PMAA_092050, PMAA_084830, PMAA_028960, PMAA_042510, PMAA_032300, PMAA_052210, PMAA_015680, PMAA_032960
GO:0071775	regulation of cell cycle cytokinesis	-	0.0268051	3	168	29	7448	0.2418	21.28	PMAA_055990, PMAA_031100, PMAA_083630
GO:0030436	asexual sporulation	-	0.0281162	5	168	76	7448	0.2492	22.18	PMAA_081680, PMAA_068430, PMAA_040210, PMAA_070290, PMAA_083630
GO:0030447	filamentous growth	-	0.0281162	5	168	76	7448	0.2464	22.18	PMAA_055990, PMAA_051360, PMAA_009130, PMAA_070190, PMAA_083630
GO:0018106	peptidyl-histidine phosphorylation	-	0.0287772	2	168	12	7448	0.2593	23.6	PMAA_091840, PMAA_093910
GO:0033238	regulation of cellular amine metabolic process	-	0.0287772	2	168	12	7448	0.2565	23.6	PMAA_068430, PMAA_040210
GO:0042168	heme metabolic process	-	0.0287772	2	168	12	7448	0.2538	23.6	PMAA_084830, PMAA_032300
GO:0042244	spore wall assembly	-	0.0287772	2	168	12	7448	0.2511	23.6	PMAA_081680, PMAA_067490
GO:0070726	cell wall assembly	-	0.0287772	2	168	12	7448	0.2484	23.6	PMAA_081680, PMAA_067490
GO:0046148	pigment biosynthetic process	-	0.0293023	3	168	30	7448	0.2502	24.02	PMAA_084830, PMAA_081680, PMAA_032300
GO:0048869	cellular developmental process	-	0.0302527	9	168	193	7448	0.2503	24.28	PMAA_068430, PMAA_040210, PMAA_041520, PMAA_054460, PMAA_067490, PMAA_088690, PMAA_055990, PMAA_081680, PMAA_070290
GO:0044257	cellular protein catabolic process	-	0.0326892	7	168	135	7448	0.2596	25.44	PMAA_041170, PMAA_041520, PMAA_029640, PMAA_085430, PMAA_085050, PMAA_039810, PMAA_099540
GO:0042176	regulation of protein catabolic process	-	0.0335131	2	168	13	7448	0.2774	27.46	PMAA_041170, PMAA_085050
GO:0006508	proteolysis	-	0.0351211	12	168	296	7448	0.2872	28.72	PMAA_041170, PMAA_045500, PMAA_013400, PMAA_015910, PMAA_076310, PMAA_029640, PMAA_085430, PMAA_093910, PMAA_069820, PMAA_085050, PMAA_039810, PMAA_099540
GO:0006796	phosphate-containing compound metabolic process	-	0.0351437	14	168	364	7448	0.2844	28.72	PMAA_071690, PMAA_055540, PMAA_042130, PMAA_098380, PMAA_080980, PMAA_021140, PMAA_010130, PMAA_083730, PMAA_091840, PMAA_028960, PMAA_093910, PMAA_092900, PMAA_083630, PMAA_028880
GO:0051641	cellular localization	-	0.0352082	18	168	505	7448	0.2816	28.72	PMAA_021140, PMAA_041520, PMAA_085430, PMAA_014380, PMAA_055990, PMAA_054570, PMAA_005360, PMAA_024900, PMAA_082150, PMAA_051360, PMAA_042130, PMAA_092720, PMAA_037440, PMAA_067490, PMAA_070190, PMAA_039810, PMAA_035220, PMAA_083630
GO:0006793	phosphorus metabolic process	-	0.0358448	14	168	365	7448	0.28	28.84	PMAA_071690, PMAA_055540, PMAA_042130, PMAA_098380, PMAA_080980, PMAA_021140, PMAA_010130, PMAA_083730, PMAA_091840, PMAA_028960, PMAA_093910, PMAA_092900, PMAA_083630, PMAA_028880
GO:0045333	cellular respiration	-	0.0370161	4	168	56	7448	0.28	29.12	PMAA_089220, PMAA_012920, PMAA_098380, PMAA_024900
GO:0051656	establishment of organelle localization	-	0.0370161	4	168	56	7448	0.2773	29.12	PMAA_005360, PMAA_037440, PMAA_067490, PMAA_035220
GO:0070590	spore wall biogenesis	-	0.0385291	2	168	14	7448	0.2962	31.4	PMAA_081680, PMAA_067490
GO:0071482	cellular response to light stimulus	-	0.0385291	2	168	14	7448	0.2935	31.4	PMAA_068430, PMAA_040210
GO:0022603	regulation of anatomical structure morphogenesis	-	0.0425641	5	168	85	7448	0.3044	32.88	PMAA_081680, PMAA_068430, PMAA_040210, PMAA_070290, PMAA_088690
GO:0030582	fruiting body development	-	0.0435557	3	168	35	7448	0.3057	33.32	PMAA_070290, PMAA_041990, PMAA_009130
GO:0030584	sporocarp development	-	0.0435557	3	168	35	7448	0.3029	33.32	PMAA_070290, PMAA_041990, PMAA_009130
GO:0043603	cellular amide metabolic process	-	0.0435557	3	168	35	7448	0.3002	33.32	PMAA_068430, PMAA_040210, PMAA_015680
GO:0031991	regulation of actomyosin contractile ring contraction	-	0.0438104	2	168	15	7448	0.3068	34.36	PMAA_055990, PMAA_031100
GO:0065008	regulation of biological quality	-	0.0446126	10	168	240	7448	0.306	34.58	PMAA_051360, PMAA_068430, PMAA_040210, PMAA_041520, PMAA_052080, PMAA_067490, PMAA_018570, PMAA_017720, PMAA_005360, PMAA_084280
GO:0044265	cellular macromolecule catabolic process	-	0.0452962	8	168	176	7448	0.3042	34.68	PMAA_041170, PMAA_041520, PMAA_029640, PMAA_085430, PMAA_071070, PMAA_085050, PMAA_039810, PMAA_099540
GO:0048519	negative regulation of biological process	-	0.0472941	11	168	276	7448	0.3047	35.04	PMAA_060250, PMAA_051360, PMAA_068430, PMAA_040210, PMAA_042130, PMAA_088690, PMAA_055990, PMAA_039540, PMAA_085050, PMAA_039810, PMAA_082150
GO:0030041	actin filament polymerization	-	0.0493425	2	168	16	7448	0.3197	37.08	PMAA_051360, PMAA_067490
GO:0030833	regulation of actin filament polymerization	-	0.0493425	2	168	16	7448	0.3169	37.08	PMAA_051360, PMAA_067490
GO:0031400	negative regulation of protein modification process	-	0.0493425	2	168	16	7448	0.3142	37.08	PMAA_055990, PMAA_082150
GO:0071478	cellular response to radiation	-	0.0493425	2	168	16	7448	0.3116	37.08	PMAA_068430, PMAA_040210
GO:0042440	pigment metabolic process	-	0.0500633	3	168	37	7448	0.3148	37.78	PMAA_084830, PMAA_081680, PMAA_032300
GO:0008643	carbohydrate transport	-	0.0507472	4	168	62	7448	0.3152	38.14	PMAA_049040, PMAA_011150, PMAA_047000, PMAA_049550
GO:0009110	vitamin biosynthetic process	-	0.0534848	3	168	38	7448	0.3231	39.42	PMAA_073270, PMAA_028960, PMAA_015680
GO:0042364	water-soluble vitamin biosynthetic process	-	0.0534848	3	168	38	7448	0.3205	39.42	PMAA_073270, PMAA_028960, PMAA_015680
GO:0000003	reproduction	-	0.0542643	12	168	317	7448	0.319	39.56	PMAA_068430, PMAA_040210, PMAA_041990, PMAA_041520, PMAA_054460, PMAA_067490, PMAA_088690, PMAA_055990, PMAA_081680, PMAA_009130, PMAA_070290, PMAA_083630
GO:0050793	regulation of developmental process	-	0.0542897	5	168	91	7448	0.3179	39.74	PMAA_081680, PMAA_068430, PMAA_040210, PMAA_070290, PMAA_088690
GO:0008064	regulation of actin polymerization or depolymerization	-	0.0551117	2	168	17	7448	0.3263	41.12	PMAA_051360, PMAA_067490
GO:0030832	regulation of actin filament length	-	0.0551117	2	168	17	7448	0.3238	41.12	PMAA_051360, PMAA_067490
GO:0035690	cellular response to drug	-	0.0551117	2	168	17	7448	0.3212	41.12	PMAA_089220, PMAA_083630
GO:0006766	vitamin metabolic process	-	0.0570159	3	168	39	7448	0.326	42.06	PMAA_073270, PMAA_028960, PMAA_015680
GO:0006767	water-soluble vitamin metabolic process	-	0.0570159	3	168	39	7448	0.3235	42.06	PMAA_073270, PMAA_028960, PMAA_015680
GO:0046578	regulation of Ras protein signal transduction	-	0.0570159	3	168	39	7448	0.3211	42.06	PMAA_055990, PMAA_031100, PMAA_057320
GO:0030448	hyphal growth	-	0.0606549	3	168	40	7448	0.3247	42.86	PMAA_009130, PMAA_070190, PMAA_083630
GO:0032465	regulation of cytokinesis	-	0.0606549	3	168	40	7448	0.3223	42.86	PMAA_055990, PMAA_031100, PMAA_083630
GO:0070887	cellular response to chemical stimulus	-	0.0607997	7	168	155	7448	0.3212	43.04	PMAA_089220, PMAA_068430, PMAA_040210, PMAA_085430, PMAA_018570, PMAA_039810, PMAA_083630
GO:0000054	ribosomal subunit export from nucleus	-	0.0611044	2	168	18	7448	0.3329	44.94	PMAA_005360, PMAA_037440
GO:0006779	porphyrin-containing compound biosynthetic process	-	0.0611044	2	168	18	7448	0.3304	44.94	PMAA_084830, PMAA_032300
GO:0018202	peptidyl-histidine modification	-	0.0611044	2	168	18	7448	0.328	44.94	PMAA_091840, PMAA_093910
GO:0032271	regulation of protein polymerization	-	0.0611044	2	168	18	7448	0.3257	44.94	PMAA_051360, PMAA_067490
GO:0033014	tetrapyrrole biosynthetic process	-	0.0611044	2	168	18	7448	0.3233	44.94	PMAA_084830, PMAA_032300
GO:0033750	ribosome localization	-	0.0611044	2	168	18	7448	0.321	44.94	PMAA_005360, PMAA_037440
GO:0033753	establishment of ribosome localization	-	0.0611044	2	168	18	7448	0.3187	44.94	PMAA_005360, PMAA_037440
GO:0071166	ribonucleoprotein complex localization	-	0.0611044	2	168	18	7448	0.3165	44.94	PMAA_005360, PMAA_037440
GO:0071426	ribonucleoprotein complex export from nucleus	-	0.0611044	2	168	18	7448	0.3143	44.94	PMAA_005360, PMAA_037440
GO:0071428	rRNA-containing ribonucleoprotein complex export from nucleus	-	0.0611044	2	168	18	7448	0.3121	44.94	PMAA_005360, PMAA_037440
GO:0019954	asexual reproduction	-	0.0653588	5	168	96	7448	0.3192	46.28	PMAA_081680, PMAA_068430, PMAA_040210, PMAA_070290, PMAA_083630
GO:0006865	amino acid transport	-	0.0669082	4	168	68	7448	0.32	46.72	PMAA_009630, PMAA_092720, PMAA_094330, PMAA_052210
GO:0051640	organelle localization	-	0.0669082	4	168	68	7448	0.3178	46.72	PMAA_005360, PMAA_037440, PMAA_067490, PMAA_035220
GO:0000160	two-component signal transduction system (phosphorelay)	-	0.0673079	2	168	19	7448	0.3235	47.88	PMAA_091840, PMAA_093910
GO:0006778	porphyrin-containing compound metabolic process	-	0.0673079	2	168	19	7448	0.3213	47.88	PMAA_084830, PMAA_032300
GO:0008154	actin polymerization or depolymerization	-	0.0673079	2	168	19	7448	0.3192	47.88	PMAA_051360, PMAA_067490
GO:0030653	beta-lactam antibiotic metabolic process	-	0.0673079	2	168	19	7448	0.3171	47.88	PMAA_068430, PMAA_040210
GO:0033013	tetrapyrrole metabolic process	-	0.0673079	2	168	19	7448	0.315	47.88	PMAA_084830, PMAA_032300
GO:0042316	penicillin metabolic process	-	0.0673079	2	168	19	7448	0.3129	47.88	PMAA_068430, PMAA_040210
GO:0070791	cleistothecium development	-	0.0673079	2	168	19	7448	0.3109	47.88	PMAA_041990, PMAA_009130
GO:0072338	cellular lactam metabolic process	-	0.0673079	2	168	19	7448	0.3089	47.88	PMAA_068430, PMAA_040210
GO:0051302	regulation of cell division	-	0.0682499	3	168	42	7448	0.3097	48.32	PMAA_055990, PMAA_031100, PMAA_083630
GO:0009416	response to light stimulus	-	0.0737098	2	168	20	7448	0.3269	51.32	PMAA_068430, PMAA_040210
GO:0010565	regulation of cellular ketone metabolic process	-	0.0737098	2	168	20	7448	0.3248	51.32	PMAA_068430, PMAA_040210
GO:0016999	antibiotic metabolic process	-	0.0737098	2	168	20	7448	0.3228	51.32	PMAA_068430, PMAA_040210
GO:0017144	drug metabolic process	-	0.0737098	2	168	20	7448	0.3207	51.32	PMAA_068430, PMAA_040210
GO:0030437	ascospore formation	-	0.0758783	4	168	71	7448	0.3226	51.94	PMAA_055990, PMAA_041520, PMAA_054460, PMAA_067490
GO:0048878	chemical homeostasis	-	0.0758783	4	168	71	7448	0.3206	51.94	PMAA_068430, PMAA_040210, PMAA_052080, PMAA_017720
GO:0009060	aerobic respiration	-	0.0762544	3	168	44	7448	0.3209	52.3	PMAA_089220, PMAA_012920, PMAA_024900
GO:0048610	cellular process involved in reproduction	-	0.0787368	8	168	198	7448	0.3211	52.66	PMAA_068430, PMAA_040210, PMAA_041520, PMAA_054460, PMAA_067490, PMAA_088690, PMAA_055990, PMAA_081680
GO:0009260	ribonucleotide biosynthetic process	-	0.0789969	4	168	72	7448	0.3199	52.78	PMAA_071690, PMAA_092050, PMAA_042510, PMAA_028960
GO:0051603	proteolysis involved in cellular protein catabolic process	-	0.079794	6	168	133	7448	0.3187	52.9	PMAA_041170, PMAA_029640, PMAA_085430, PMAA_085050, PMAA_039810, PMAA_099540
GO:0010927	cellular component assembly involved in morphogenesis	-	0.080298	2	168	21	7448	0.3219	53.76	PMAA_081680, PMAA_067490
GO:0048608	reproductive structure development	-	0.0846524	3	168	46	7448	0.341	57.28	PMAA_070290, PMAA_041990, PMAA_009130
GO:0051056	regulation of small GTPase mediated signal transduction	-	0.0846524	3	168	46	7448	0.3389	57.28	PMAA_055990, PMAA_031100, PMAA_057320
GO:0075259	spore-bearing organ development	-	0.0846524	3	168	46	7448	0.3369	57.28	PMAA_070290, PMAA_041990, PMAA_009130
GO:0009314	response to radiation	-	0.0870609	2	168	22	7448	0.3462	59.2	PMAA_068430, PMAA_040210
GO:0071705	nitrogen compound transport	-	0.0870609	2	168	22	7448	0.3442	59.2	PMAA_092720, PMAA_024900
GO:0044283	small molecule biosynthetic process	-	0.0872402	10	168	272	7448	0.3427	59.28	PMAA_012920, PMAA_041990, PMAA_054460, PMAA_069900, PMAA_073270, PMAA_028960, PMAA_092900, PMAA_069820, PMAA_089000, PMAA_015680
GO:0009057	macromolecule catabolic process	-	0.0888727	10	168	273	7448	0.3425	59.6	PMAA_041170, PMAA_041520, PMAA_029640, PMAA_085430, PMAA_071070, PMAA_099830, PMAA_069820, PMAA_039810, PMAA_085050, PMAA_099540
GO:0042546	cell wall biogenesis	-	0.0889936	3	168	47	7448	0.3421	59.86	PMAA_055990, PMAA_081680, PMAA_067490
GO:0048513	organ development	-	0.0889936	3	168	47	7448	0.3401	59.86	PMAA_070290, PMAA_041990, PMAA_009130
GO:0009259	ribonucleotide metabolic process	-	0.0925807	9	168	240	7448	0.3418	60.5	PMAA_071690, PMAA_060250, PMAA_092050, PMAA_037440, PMAA_067490, PMAA_070190, PMAA_028960, PMAA_042510, PMAA_057320
GO:0033205	cell cycle cytokinesis	-	0.0955244	4	168	77	7448	0.3566	63.48	PMAA_055990, PMAA_051360, PMAA_031100, PMAA_083630
GO:0048731	system development	-	0.0979493	3	168	49	7448	0.361	64.62	PMAA_070290, PMAA_041990, PMAA_009130
GO:0048468	cell development	-	0.0990118	4	168	78	7448	0.3623	65.22	PMAA_055990, PMAA_041520, PMAA_054460, PMAA_067490
GO:0006869	lipid transport	-	0.101067	2	168	24	7448	0.3831	69.34	PMAA_021140, PMAA_092720
GO:0015849	organic acid transport	-	0.102558	4	168	79	7448	0.3848	70.04	PMAA_009630, PMAA_092720, PMAA_094330, PMAA_052210
GO:0046942	carboxylic acid transport	-	0.102558	4	168	79	7448	0.3827	70.04	PMAA_009630, PMAA_092720, PMAA_094330, PMAA_052210
GO:0065007	biological regulation	-	0.104755	38	168	1383	7448	0.3841	70.68	PMAA_041170, PMAA_021140, PMAA_041520, PMAA_047890, PMAA_055990, PMAA_005360, PMAA_091840, PMAA_093910, PMAA_082150, PMAA_051360, PMAA_019260, PMAA_040210, PMAA_042130, PMAA_093380, PMAA_052080, PMAA_018570, PMAA_017720, PMAA_031420, PMAA_031100, PMAA_098430, PMAA_070190, PMAA_084280, PMAA_083630, PMAA_057320, PMAA_035220, PMAA_060250, PMAA_068430, PMAA_039540, PMAA_081680, PMAA_070290, PMAA_0929…
GO:0007265	Ras protein signal transduction	-	0.107254	3	168	51	7448	0.3918	72.48	PMAA_055990, PMAA_031100, PMAA_057320
GO:0044106	cellular amine metabolic process	-	0.107254	3	168	51	7448	0.3897	72.48	PMAA_068430, PMAA_040210, PMAA_041990
GO:0006099	tricarboxylic acid cycle	-	0.108289	2	168	25	7448	0.3997	74.74	PMAA_089220, PMAA_012920
GO:0009084	glutamine family amino acid biosynthetic process	-	0.108289	2	168	25	7448	0.3976	74.74	PMAA_012920, PMAA_092900
GO:0009109	coenzyme catabolic process	-	0.108289	2	168	25	7448	0.3954	74.74	PMAA_089220, PMAA_012920
GO:0009156	ribonucleoside monophosphate biosynthetic process	-	0.108289	2	168	25	7448	0.3934	74.74	PMAA_071690, PMAA_028960
GO:0009161	ribonucleoside monophosphate metabolic process	-	0.108289	2	168	25	7448	0.3913	74.74	PMAA_071690, PMAA_028960
GO:0010876	lipid localization	-	0.108289	2	168	25	7448	0.3893	74.74	PMAA_021140, PMAA_092720
GO:0032269	negative regulation of cellular protein metabolic process	-	0.108289	2	168	25	7448	0.3873	74.74	PMAA_055990, PMAA_082150
GO:0032956	regulation of actin cytoskeleton organization	-	0.108289	2	168	25	7448	0.3853	74.74	PMAA_051360, PMAA_067490
GO:0032970	regulation of actin filament-based process	-	0.108289	2	168	25	7448	0.3833	74.74	PMAA_051360, PMAA_067490
GO:0046356	acetyl-CoA catabolic process	-	0.108289	2	168	25	7448	0.3813	74.74	PMAA_089220, PMAA_012920
GO:0000910	cytokinesis	-	0.108535	5	168	112	7448	0.3807	75	PMAA_055990, PMAA_051360, PMAA_031100, PMAA_054650, PMAA_083630
GO:0006461	protein complex assembly	-	0.11161	5	168	113	7448	0.3827	75.78	PMAA_051360, PMAA_041170, PMAA_032300, PMAA_023300, PMAA_067490
GO:0040007	growth	-	0.11161	5	168	113	7448	0.3808	75.78	PMAA_055990, PMAA_051360, PMAA_009130, PMAA_070190, PMAA_083630
GO:0070271	protein complex biogenesis	-	0.114726	5	168	114	7448	0.3842	76.84	PMAA_051360, PMAA_041170, PMAA_032300, PMAA_023300, PMAA_067490
GO:0000077	DNA damage checkpoint	-	0.115644	2	168	26	7448	0.3923	78.86	PMAA_055990, PMAA_039540
GO:0051187	cofactor catabolic process	-	0.115644	2	168	26	7448	0.3904	78.86	PMAA_089220, PMAA_012920
GO:0051258	protein polymerization	-	0.115644	2	168	26	7448	0.3885	78.86	PMAA_051360, PMAA_067490
GO:0051345	positive regulation of hydrolase activity	-	0.115644	2	168	26	7448	0.3866	78.86	PMAA_021140, PMAA_057320
GO:0048523	negative regulation of cellular process	-	0.115793	9	168	252	7448	0.385	78.92	PMAA_060250, PMAA_051360, PMAA_068430, PMAA_042130, PMAA_088690, PMAA_055990, PMAA_039540, PMAA_039810, PMAA_082150
GO:0003333	amino acid transmembrane transport	-	0.11689	3	168	53	7448	0.3856	79.44	PMAA_009630, PMAA_092720, PMAA_094330
GO:0006725	cellular aromatic compound metabolic process	-	0.120147	6	168	149	7448	0.3882	80.36	PMAA_068430, PMAA_040210, PMAA_041990, PMAA_089000, PMAA_088690, PMAA_032960
GO:0032506	cytokinetic process	-	0.12114	4	168	84	7448	0.3881	80.72	PMAA_055990, PMAA_051360, PMAA_031100, PMAA_054650
GO:0019748	secondary metabolic process	-	0.121825	3	168	54	7448	0.3918	81.88	PMAA_068430, PMAA_040210, PMAA_088690
GO:0044087	regulation of cellular component biogenesis	-	0.121825	3	168	54	7448	0.3899	81.88	PMAA_055990, PMAA_051360, PMAA_067490
GO:0032954	regulation of cytokinetic process	-	0.123122	2	168	27	7448	0.3979	83.96	PMAA_055990, PMAA_031100
GO:0007165	signal transduction	-	0.12389	8	168	220	7448	0.3975	84.28	PMAA_055990, PMAA_040210, PMAA_031100, PMAA_070190, PMAA_091840, PMAA_093910, PMAA_083630, PMAA_057320
GO:0051188	cofactor biosynthetic process	-	0.124323	5	168	117	7448	0.3962	84.38	PMAA_084830, PMAA_028960, PMAA_032300, PMAA_032960, PMAA_015680
GO:0051186	cofactor metabolic process	-	0.12446	7	168	185	7448	0.3947	84.46	PMAA_084830, PMAA_089220, PMAA_012920, PMAA_028960, PMAA_032300, PMAA_032960, PMAA_015680
GO:0006790	sulfur compound metabolic process	-	0.125021	4	168	85	7448	0.3968	85.32	PMAA_069900, PMAA_068430, PMAA_040210, PMAA_015680
GO:0007154	cell communication	-	0.129428	10	168	295	7448	0.3982	86.02	PMAA_040210, PMAA_071070, PMAA_055990, PMAA_031100, PMAA_070190, PMAA_091840, PMAA_093910, PMAA_039810, PMAA_057320, PMAA_083630
GO:0048522	positive regulation of cellular process	-	0.129602	7	168	187	7448	0.397	86.14	PMAA_060250, PMAA_055990, PMAA_081680, PMAA_068430, PMAA_040210, PMAA_070290, PMAA_067490
GO:0009405	pathogenesis	-	0.130714	2	168	28	7448	0.4023	87.7	PMAA_070190, PMAA_083630
GO:0023052	signaling	-	0.130933	8	168	223	7448	0.4017	87.98	PMAA_055990, PMAA_040210, PMAA_031100, PMAA_070190, PMAA_091840, PMAA_093910, PMAA_083630, PMAA_057320
GO:0022413	reproductive process in single-celled organism	-	0.136972	4	168	88	7448	0.4095	90.1	PMAA_055990, PMAA_041520, PMAA_054460, PMAA_067490
GO:0009894	regulation of catabolic process	-	0.137075	3	168	57	7448	0.4103	90.68	PMAA_041170, PMAA_085050, PMAA_057320
GO:0000909	sporocarp development involved in sexual reproduction	-	0.138411	2	168	29	7448	0.4184	92.88	PMAA_041990, PMAA_009130
GO:0043254	regulation of protein complex assembly	-	0.138411	2	168	29	7448	0.4165	92.88	PMAA_051360, PMAA_067490
GO:0043936	asexual sporulation resulting in formation of a cellular spore	-	0.138411	2	168	29	7448	0.4146	92.88	PMAA_068430, PMAA_070290
GO:0071310	cellular response to organic substance	-	0.138411	2	168	29	7448	0.4128	92.88	PMAA_068430, PMAA_040210
GO:0032787	monocarboxylic acid metabolic process	-	0.141113	5	168	122	7448	0.4137	93.5	PMAA_012920, PMAA_092720, PMAA_080670, PMAA_069820, PMAA_015680
GO:0009892	negative regulation of metabolic process	-	0.143514	6	168	157	7448	0.413	93.74	PMAA_060250, PMAA_055990, PMAA_068430, PMAA_085050, PMAA_039810, PMAA_082150
GO:0016310	phosphorylation	-	0.144151	10	168	302	7448	0.4115	93.82	PMAA_071690, PMAA_042130, PMAA_098380, PMAA_080980, PMAA_010130, PMAA_028960, PMAA_093910, PMAA_091840, PMAA_092900, PMAA_028880
GO:0043623	cellular protein complex assembly	-	0.145187	4	168	90	7448	0.4104	93.98	PMAA_051360, PMAA_041170, PMAA_023300, PMAA_067490
GO:0044248	cellular catabolic process	-	0.148197	16	168	534	7448	0.419	96.38	PMAA_060250, PMAA_089220, PMAA_041170, PMAA_012920, PMAA_092720, PMAA_041520, PMAA_037440, PMAA_029640, PMAA_085430, PMAA_071070, PMAA_067490, PMAA_070190, PMAA_085050, PMAA_039810, PMAA_099540, PMAA_057320
GO:0009891	positive regulation of biosynthetic process	-	0.149367	4	168	91	7448	0.419	96.78	PMAA_060250, PMAA_081680, PMAA_068430, PMAA_040210
GO:0031328	positive regulation of cellular biosynthetic process	-	0.149367	4	168	91	7448	0.4172	96.78	PMAA_060250, PMAA_081680, PMAA_068430, PMAA_040210
GO:0051172	negative regulation of nitrogen compound metabolic process	-	0.15164	5	168	125	7448	0.416	96.92	PMAA_060250, PMAA_055990, PMAA_068430, PMAA_039810, PMAA_082150
GO:0050790	regulation of catalytic activity	-	0.153592	4	168	92	7448	0.4168	97.52	PMAA_055990, PMAA_042130, PMAA_021140, PMAA_057320
GO:0009073	aromatic amino acid family biosynthetic process	-	0.154087	2	168	31	7448	0.4242	99.68	PMAA_041990, PMAA_089000
GO:0009308	amine metabolic process	-	0.158352	3	168	61	7448	0.4253	100.38	PMAA_068430, PMAA_040210, PMAA_041990
GO:0019438	aromatic compound biosynthetic process	-	0.158352	3	168	61	7448	0.4235	100.38	PMAA_041990, PMAA_089000, PMAA_032960
GO:0007015	actin filament organization	-	0.162049	2	168	32	7448	0.4322	102.86	PMAA_051360, PMAA_067490
GO:0010639	negative regulation of organelle organization	-	0.162049	2	168	32	7448	0.4304	102.86	PMAA_051360, PMAA_082150
GO:0071822	protein complex subunit organization	-	0.166173	5	168	129	7448	0.4354	104.5	PMAA_051360, PMAA_041170, PMAA_032300, PMAA_023300, PMAA_067490
GO:0051716	cellular response to stimulus	-	0.167933	18	168	625	7448	0.4341	104.62	PMAA_089220, PMAA_068430, PMAA_085430, PMAA_055990, PMAA_039540, PMAA_091840, PMAA_093910, PMAA_040210, PMAA_018570, PMAA_071070, PMAA_088690, PMAA_031100, PMAA_009130, PMAA_070190, PMAA_039810, PMAA_085050, PMAA_057320, PMAA_083630
GO:0031399	regulation of protein modification process	-	0.169351	3	168	63	7448	0.4353	105.34	PMAA_055990, PMAA_042130, PMAA_082150
GO:0006084	acetyl-CoA metabolic process	-	0.170084	2	168	33	7448	0.4401	106.94	PMAA_089220, PMAA_012920
GO:0006497	protein lipidation	-	0.170084	2	168	33	7448	0.4383	106.94	PMAA_041170, PMAA_094610
GO:0009124	nucleoside monophosphate biosynthetic process	-	0.170084	2	168	33	7448	0.4365	106.94	PMAA_071690, PMAA_028960
GO:0042157	lipoprotein metabolic process	-	0.170084	2	168	33	7448	0.4347	106.94	PMAA_041170, PMAA_094610
GO:0042158	lipoprotein biosynthetic process	-	0.170084	2	168	33	7448	0.433	106.94	PMAA_041170, PMAA_094610
GO:0048518	positive regulation of biological process	-	0.171419	7	168	202	7448	0.4335	107.5	PMAA_060250, PMAA_055990, PMAA_081680, PMAA_068430, PMAA_040210, PMAA_070290, PMAA_067490
GO:0007264	small GTPase mediated signal transduction	-	0.175372	4	168	97	7448	0.4371	108.84	PMAA_055990, PMAA_031100, PMAA_070190, PMAA_057320
GO:0065009	regulation of molecular function	-	0.175372	4	168	97	7448	0.4354	108.84	PMAA_055990, PMAA_042130, PMAA_021140, PMAA_057320
GO:0051301	cell division	-	0.175408	6	168	167	7448	0.4345	109.06	PMAA_055990, PMAA_051360, PMAA_031100, PMAA_042130, PMAA_054650, PMAA_083630
GO:0009123	nucleoside monophosphate metabolic process	-	0.178185	2	168	34	7448	0.4417	111.3	PMAA_071690, PMAA_028960
GO:0009272	fungal-type cell wall biogenesis	-	0.178185	2	168	34	7448	0.4399	111.3	PMAA_055990, PMAA_067490
GO:0030036	actin cytoskeleton organization	-	0.180565	3	168	65	7448	0.4408	111.96	PMAA_051360, PMAA_031100, PMAA_067490
GO:0055114	oxidation-reduction process	-	0.181698	30	168	1124	7448	0.4402	112.24	PMAA_089220, PMAA_082030, PMAA_081450, PMAA_098380, PMAA_021820, PMAA_015980, PMAA_020160, PMAA_028330, PMAA_055990, PMAA_073270, PMAA_024900, PMAA_022690, PMAA_092900, PMAA_082150, PMAA_030170, PMAA_006080, PMAA_012920, PMAA_080670, PMAA_071630, PMAA_018570, PMAA_054360, PMAA_065440, PMAA_088690, PMAA_084740, PMAA_064600, PMAA_043060, PMAA_027300, PMAA_065540, PMAA_032300, PMAA_039120
GO:0006357	regulation of transcription from RNA polymerase II promoter	-	0.185081	5	168	134	7448	0.4432	113.46	PMAA_060250, PMAA_019260, PMAA_055990, PMAA_081680, PMAA_070290
GO:0000122	negative regulation of transcription from RNA polymerase II promoter	-	0.186344	2	168	35	7448	0.4532	116.48	PMAA_060250, PMAA_055990
GO:0031570	DNA integrity checkpoint	-	0.186344	2	168	35	7448	0.4515	116.48	PMAA_055990, PMAA_039540
GO:0019725	cellular homeostasis	-	0.188923	4	168	100	7448	0.4517	116.98	PMAA_068430, PMAA_040210, PMAA_052080, PMAA_018570
GO:0016192	vesicle-mediated transport	-	0.189632	7	168	208	7448	0.4505	117.12	PMAA_054570, PMAA_021140, PMAA_005360, PMAA_041520, PMAA_014380, PMAA_067490, PMAA_039810
GO:0030029	actin filament-based process	-	0.191974	3	168	67	7448	0.452	117.98	PMAA_051360, PMAA_031100, PMAA_067490
GO:0055082	cellular chemical homeostasis	-	0.191974	3	168	67	7448	0.4503	117.98	PMAA_068430, PMAA_040210, PMAA_052080
GO:0042592	homeostatic process	-	0.192859	5	168	136	7448	0.4495	118.22	PMAA_068430, PMAA_040210, PMAA_052080, PMAA_018570, PMAA_017720
GO:0051493	regulation of cytoskeleton organization	-	0.194555	2	168	36	7448	0.4515	119.2	PMAA_051360, PMAA_067490
GO:0050794	regulation of cellular process	-	0.195969	32	168	1218	7448	0.4513	119.6	PMAA_041170, PMAA_021140, PMAA_047890, PMAA_055990, PMAA_091840, PMAA_093910, PMAA_082150, PMAA_051360, PMAA_019260, PMAA_042130, PMAA_040210, PMAA_093380, PMAA_018570, PMAA_031420, PMAA_031100, PMAA_098430, PMAA_070190, PMAA_083630, PMAA_057320, PMAA_035220, PMAA_060250, PMAA_068430, PMAA_039540, PMAA_081680, PMAA_070290, PMAA_092900, PMAA_067490, PMAA_096860, PMAA_088690, PMAA_073640, PMAA_0661…
GO:0007275	multicellular organismal development	-	0.198139	4	168	102	7448	0.4581	121.86	PMAA_070290, PMAA_041990, PMAA_009130, PMAA_055410
Ontology Aspect: Function
GO ID	TERM	CORRECTED PVALUE	UNCORRECTED PVALUE	NUM LIST ANNOTATIONS	LIST SIZE	TOTAL NUM ANNOTATIONS	POPULATION SIZE	FDR RATE	EXPECTED FALSE POSITIVES	P. marneffei Gene Model ID
GO:XXXXXXX	unannotated	-	8.04131e-05	40	168	969	7448	0	0	PMAA_039930, PMAA_014440, PMAA_099880, PMAA_041520, PMAA_059830, PMAA_028140, PMAA_078660, PMAA_001740, PMAA_007740, PMAA_041380, PMAA_041190, PMAA_065170, PMAA_063100, PMAA_056120, PMAA_100870, PMAA_059560, PMAA_075290, PMAA_058480, PMAA_091660, PMAA_045900, PMAA_032960, PMAA_029990, PMAA_068430, PMAA_060150, PMAA_080130, PMAA_014380, PMAA_010280, PMAA_040020, PMAA_024550, PMAA_081680, PMAA_0627…
GO:0019825	oxygen binding	-	0.00050583	2	168	2	7448	0.14	0.28	PMAA_055410, PMAA_088690
GO:0000257	nitrilase activity	-	0.00294552	2	168	4	7448	0.32	0.96	PMAA_063790, PMAA_077810
GO:0005546	phosphatidylinositol-4,5-bisphosphate binding	-	0.00294552	2	168	4	7448	0.24	0.96	PMAA_054570, PMAA_021140
GO:0016815	hydrolase activity, acting on carbon-nitrogen (but not peptide) bonds, in nitriles	-	0.00294552	2	168	4	7448	0.192	0.96	PMAA_063790, PMAA_077810
GO:0016651	oxidoreductase activity, acting on NADH or NADPH	-	0.00430268	5	168	48	7448	0.2033	1.22	PMAA_081450, PMAA_071630, PMAA_032300, PMAA_028330, PMAA_064600
GO:0003954	NADH dehydrogenase activity	-	0.00433039	4	168	30	7448	0.1743	1.22	PMAA_081450, PMAA_071630, PMAA_028330, PMAA_064600
GO:0008137	NADH dehydrogenase (ubiquinone) activity	-	0.00433039	4	168	30	7448	0.1525	1.22	PMAA_081450, PMAA_071630, PMAA_028330, PMAA_064600
GO:0050136	NADH dehydrogenase (quinone) activity	-	0.00433039	4	168	30	7448	0.1356	1.22	PMAA_081450, PMAA_071630, PMAA_028330, PMAA_064600
GO:0016655	oxidoreductase activity, acting on NADH or NADPH, quinone or similar compound as acceptor	-	0.00683413	4	168	34	7448	0.194	1.94	PMAA_081450, PMAA_071630, PMAA_028330, PMAA_064600
GO:0015179	L-amino acid transmembrane transporter activity	-	0.0129515	2	168	8	7448	0.3618	3.98	PMAA_094330, PMAA_052210
GO:0051536	iron-sulfur cluster binding	-	0.0132146	4	168	41	7448	0.3383	4.06	PMAA_089220, PMAA_020160, PMAA_028330, PMAA_015680
GO:0051540	metal cluster binding	-	0.0132146	4	168	41	7448	0.3123	4.06	PMAA_089220, PMAA_020160, PMAA_028330, PMAA_015680
GO:0004177	aminopeptidase activity	-	0.0180116	3	168	25	7448	0.38	5.32	PMAA_013400, PMAA_029640, PMAA_069820
GO:0010181	FMN binding	-	0.0181423	4	168	45	7448	0.356	5.34	PMAA_030170, PMAA_073270, PMAA_027300, PMAA_084740
GO:0051287	NAD binding	-	0.0209817	4	168	47	7448	0.37	5.92	PMAA_012920, PMAA_080670, PMAA_065540, PMAA_092900
GO:0008238	exopeptidase activity	-	0.0274404	4	168	51	7448	0.4341	7.38	PMAA_045500, PMAA_013400, PMAA_029640, PMAA_069820
GO:0000155	two-component sensor activity	-	0.0385291	2	168	14	7448	0.5322	9.58	PMAA_091840, PMAA_093910
GO:0004673	protein histidine kinase activity	-	0.0385291	2	168	14	7448	0.5042	9.58	PMAA_091840, PMAA_093910
GO:0016775	phosphotransferase activity, nitrogenous group as acceptor	-	0.0385291	2	168	14	7448	0.479	9.58	PMAA_091840, PMAA_093910
GO:0030234	enzyme regulator activity	-	0.0536777	6	168	120	7448	0.5829	12.24	PMAA_055990, PMAA_041170, PMAA_031100, PMAA_042130, PMAA_005360, PMAA_057320
GO:0004221	ubiquitin thiolesterase activity	-	0.0737098	2	168	20	7448	0.7182	15.8	PMAA_039810, PMAA_099540
GO:0008047	enzyme activator activity	-	0.0762544	3	168	44	7448	0.7043	16.2	PMAA_041170, PMAA_005360, PMAA_057320
GO:0032403	protein complex binding	-	0.080298	2	168	21	7448	0.72	17.28	PMAA_041170, PMAA_018570
GO:0038023	signaling receptor activity	-	0.0870609	2	168	22	7448	0.7424	18.56	PMAA_091840, PMAA_093910
GO:0016645	oxidoreductase activity, acting on the CH-NH group of donors	-	0.101067	2	168	24	7448	0.7938	20.64	PMAA_020160, PMAA_088690
GO:0008236	serine-type peptidase activity	-	0.102559	3	168	50	7448	0.7733	20.88	PMAA_045500, PMAA_013400, PMAA_076310
GO:0017171	serine hydrolase activity	-	0.102559	3	168	50	7448	0.7457	20.88	PMAA_045500, PMAA_013400, PMAA_076310
GO:0004871	signal transducer activity	-	0.112032	3	168	52	7448	0.7903	22.92	PMAA_040210, PMAA_091840, PMAA_093910
GO:0060089	molecular transducer activity	-	0.112032	3	168	52	7448	0.764	22.92	PMAA_040210, PMAA_091840, PMAA_093910
GO:0008422	beta-glucosidase activity	-	0.115644	2	168	26	7448	0.7626	23.64	PMAA_099830, PMAA_054650
GO:0070011	peptidase activity, acting on L-amino acid peptides	-	0.117054	8	168	217	7448	0.7444	23.82	PMAA_045500, PMAA_013400, PMAA_015910, PMAA_076310, PMAA_029640, PMAA_093910, PMAA_069820, PMAA_039810
GO:0048037	cofactor binding	-	0.127337	14	168	444	7448	0.8333	27.5	PMAA_030170, PMAA_012920, PMAA_021820, PMAA_080670, PMAA_028330, PMAA_084740, PMAA_043060, PMAA_084830, PMAA_073270, PMAA_069900, PMAA_027300, PMAA_065540, PMAA_092900, PMAA_039120
GO:0008237	metallopeptidase activity	-	0.13192	3	168	56	7448	0.8288	28.18	PMAA_015910, PMAA_093910, PMAA_069820
GO:0015171	amino acid transmembrane transporter activity	-	0.137075	3	168	57	7448	0.8166	28.58	PMAA_009630, PMAA_094330, PMAA_052210
GO:0015297	antiporter activity	-	0.138411	2	168	29	7448	0.8172	29.42	PMAA_024900, PMAA_052210
GO:0016790	thiolester hydrolase activity	-	0.138411	2	168	29	7448	0.7951	29.42	PMAA_039810, PMAA_099540
GO:0050662	coenzyme binding	-	0.146323	10	168	303	7448	0.8242	31.32	PMAA_030170, PMAA_012920, PMAA_021820, PMAA_080670, PMAA_084740, PMAA_043060, PMAA_073270, PMAA_027300, PMAA_065540, PMAA_092900
GO:0005515	protein binding	-	0.147892	14	168	456	7448	0.8092	31.56	PMAA_060250, PMAA_006080, PMAA_051360, PMAA_041170, PMAA_042130, PMAA_067490, PMAA_018570, PMAA_055990, PMAA_005360, PMAA_093910, PMAA_092900, PMAA_085050, PMAA_083630, PMAA_035220
GO:0005275	amine transmembrane transporter activity	-	0.152939	3	168	60	7448	0.81	32.4	PMAA_009630, PMAA_094330, PMAA_052210
GO:0035091	phosphatidylinositol binding	-	0.170084	2	168	33	7448	0.8702	35.68	PMAA_054570, PMAA_021140
GO:0016810	hydrolase activity, acting on carbon-nitrogen (but not peptide) bonds	-	0.175372	4	168	97	7448	0.861	36.16	PMAA_060900, PMAA_086150, PMAA_063790, PMAA_077810
GO:0008233	peptidase activity	-	0.180086	8	168	242	7448	0.8572	36.86	PMAA_045500, PMAA_013400, PMAA_015910, PMAA_076310, PMAA_029640, PMAA_093910, PMAA_069820, PMAA_039810
GO:0004872	receptor activity	-	0.191974	3	168	67	7448	0.8773	38.6	PMAA_091840, PMAA_093910, PMAA_054460
GO:0046943	carboxylic acid transmembrane transporter activity	-	0.197746	3	168	68	7448	0.8813	39.66	PMAA_009630, PMAA_094330, PMAA_052210

## Sheet: Cluster 2
Table S7. GO associations for early and late expression clusters.
Ontology Aspect: Process
GO ID	TERM	CORRECTED PVALUE	UNCORRECTED PVALUE	NUM LIST ANNOTATIONS	LIST SIZE	TOTAL NUM ANNOTATIONS	POPULATION SIZE	FDR RATE	EXPECTED FALSE POSITIVES	P. marneffei Gene Model ID
GO:0030968	endoplasmic reticulum unfolded protein response	-	3.41581e-05	3	114	5	7448	0.02	0.02	PMAA_095250, PMAA_040090, PMAA_008830
GO:0034620	cellular response to unfolded protein	-	3.41581e-05	3	114	5	7448	0.01	0.02	PMAA_095250, PMAA_040090, PMAA_008830
GO:0006984	ER-nucleus signaling pathway	-	6.75532e-05	3	114	6	7448	0.0067	0.02	PMAA_095250, PMAA_040090, PMAA_008830
GO:0034976	response to endoplasmic reticulum stress	-	6.75532e-05	3	114	6	7448	0.005	0.02	PMAA_095250, PMAA_040090, PMAA_008830
GO:0006986	response to unfolded protein	-	0.000184952	3	114	8	7448	0.012	0.06	PMAA_095250, PMAA_040090, PMAA_008830
GO:0035967	cellular response to topologically incorrect protein	-	0.000387543	3	114	10	7448	0.0367	0.22	PMAA_095250, PMAA_040090, PMAA_008830
GO:XXXXXXX	unannotated	-	0.000655761	33	114	1238	7448	0.0486	0.34	PMAA_074840, PMAA_072140, PMAA_075860, PMAA_009150, PMAA_019010, PMAA_076680, PMAA_020560, PMAA_088670, PMAA_066040, PMAA_101620, PMAA_017640, PMAA_008220, PMAA_066580, PMAA_090730, PMAA_070510, PMAA_076380, PMAA_040890, PMAA_036890, PMAA_019770, PMAA_041320, PMAA_097290, PMAA_020890, PMAA_028120, PMAA_007780, PMAA_040500, PMAA_095670, PMAA_102470, PMAA_042070, PMAA_012160, PMAA_010220, PMAA_0582…
GO:0035966	response to topologically incorrect protein	-	0.000893164	3	114	13	7448	0.08	0.64	PMAA_095250, PMAA_040090, PMAA_008830
GO:0071310	cellular response to organic substance	-	0.000920244	4	114	29	7448	0.0733	0.66	PMAA_095250, PMAA_040090, PMAA_008830, PMAA_080560
GO:0010033	response to organic substance	-	0.0032715	5	114	66	7448	0.212	2.12	PMAA_095250, PMAA_040090, PMAA_095560, PMAA_008830, PMAA_080560
GO:0007165	signal transduction	-	0.00642344	9	114	220	7448	0.42	4.62	PMAA_095250, PMAA_040090, PMAA_022080, PMAA_008830, PMAA_006930, PMAA_035110, PMAA_079340, PMAA_063480, PMAA_093920
GO:0023052	signaling	-	0.00700167	9	114	223	7448	0.4017	4.82	PMAA_095250, PMAA_040090, PMAA_022080, PMAA_008830, PMAA_006930, PMAA_035110, PMAA_079340, PMAA_063480, PMAA_093920
GO:0008654	phospholipid biosynthetic process	-	0.0110296	4	114	57	7448	0.5923	7.7	PMAA_022080, PMAA_084230, PMAA_017210, PMAA_019030
GO:0006084	acetyl-CoA metabolic process	-	0.0136474	3	114	33	7448	0.6557	9.18	PMAA_017210, PMAA_035660, PMAA_005610
GO:0018106	peptidyl-histidine phosphorylation	-	0.0138666	2	114	12	7448	0.664	9.96	PMAA_035110, PMAA_093920
GO:0016584	nucleosome positioning	-	0.0187422	2	114	14	7448	0.83	13.28	PMAA_049350, PMAA_080560
GO:0006644	phospholipid metabolic process	-	0.0190469	5	114	101	7448	0.7812	13.28	PMAA_022080, PMAA_084230, PMAA_023330, PMAA_017210, PMAA_019030
GO:0015074	DNA integration	-	0.0235135	6	114	145	7448	0.8622	15.52	PMAA_076660, PMAA_050290, PMAA_015260, PMAA_037580, PMAA_062210, PMAA_006540
GO:0035690	cellular response to drug	-	0.0271889	2	114	17	7448	0.9389	17.84	PMAA_039680, PMAA_028000
GO:0019637	organophosphate metabolic process	-	0.0302392	5	114	114	7448	0.961	19.22	PMAA_022080, PMAA_084230, PMAA_023330, PMAA_017210, PMAA_019030
GO:0018202	peptidyl-histidine modification	-	0.0302862	2	114	18	7448	0.959	20.14	PMAA_035110, PMAA_093920
GO:0070887	cellular response to chemical stimulus	-	0.0312843	6	114	155	7448	0.9645	21.22	PMAA_095250, PMAA_040090, PMAA_039680, PMAA_028000, PMAA_008830, PMAA_080560
GO:0090305	nucleic acid phosphodiester bond hydrolysis	-	0.032926	3	114	46	7448	0.967	22.24	PMAA_060200, PMAA_064100, PMAA_066500
GO:0000160	two-component signal transduction system (phosphorelay)	-	0.0335163	2	114	19	7448	0.9575	22.98	PMAA_035110, PMAA_093920
GO:0043086	negative regulation of catalytic activity	-	0.0335163	2	114	19	7448	0.9192	22.98	PMAA_055980, PMAA_035110
GO:0071852	fungal-type cell wall organization or biogenesis	-	0.0338534	4	114	80	7448	0.8885	23.1	PMAA_035260, PMAA_028000, PMAA_008830, PMAA_006690
GO:0042546	cell wall biogenesis	-	0.0347894	3	114	47	7448	0.8659	23.38	PMAA_035260, PMAA_028000, PMAA_006690
GO:0007154	cell communication	-	0.036504	9	114	295	7448	0.8429	23.6	PMAA_095250, PMAA_040090, PMAA_022080, PMAA_008830, PMAA_006930, PMAA_035110, PMAA_079340, PMAA_063480, PMAA_093920
GO:0000447	endonucleolytic cleavage in ITS1 to separate SSU-rRNA from 5.8S rRNA and LSU-rRNA from tricistronic rRNA transcript (SSU-rRNA, 5.8S rRNA, LSU-rRNA)	-	0.0368745	2	114	20	7448	0.8538	24.76	PMAA_060200, PMAA_064100
GO:0000478	endonucleolytic cleavage involved in rRNA processing	-	0.0368745	2	114	20	7448	0.8253	24.76	PMAA_060200, PMAA_064100
GO:0000479	endonucleolytic cleavage of tricistronic rRNA transcript (SSU-rRNA, 5.8S rRNA, LSU-rRNA)	-	0.0368745	2	114	20	7448	0.7987	24.76	PMAA_060200, PMAA_064100
GO:0008610	lipid biosynthetic process	-	0.0385913	6	114	163	7448	0.7806	24.98	PMAA_022080, PMAA_084230, PMAA_005580, PMAA_017210, PMAA_091380, PMAA_019030
GO:0044092	negative regulation of molecular function	-	0.0439566	2	114	22	7448	0.8582	28.32	PMAA_055980, PMAA_035110
GO:0045023	G0 to G1 transition	-	0.0439566	2	114	22	7448	0.8329	28.32	PMAA_096670, PMAA_017210
GO:0070316	regulation of G0 to G1 transition	-	0.0439566	2	114	22	7448	0.8091	28.32	PMAA_096670, PMAA_017210
GO:0070317	negative regulation of G0 to G1 transition	-	0.0439566	2	114	22	7448	0.7867	28.32	PMAA_096670, PMAA_017210
GO:0000320	re-entry into mitotic cell cycle	-	0.0476718	2	114	23	7448	0.8265	30.58	PMAA_096670, PMAA_017210
GO:0044255	cellular lipid metabolic process	-	0.0503839	7	114	219	7448	0.8289	31.5	PMAA_022080, PMAA_084230, PMAA_023330, PMAA_005580, PMAA_017210, PMAA_091380, PMAA_019030
GO:0006629	lipid metabolic process	-	0.0516877	9	114	315	7448	0.8779	34.24	PMAA_022080, PMAA_084230, PMAA_023330, PMAA_005580, PMAA_017210, PMAA_004490, PMAA_091380, PMAA_053530, PMAA_019030
GO:0031505	fungal-type cell wall organization	-	0.0587501	3	114	58	7448	0.939	37.56	PMAA_035260, PMAA_028000, PMAA_008830
GO:0042221	response to chemical stimulus	-	0.0647045	7	114	232	7448	0.9946	40.78	PMAA_095250, PMAA_040090, PMAA_095560, PMAA_039680, PMAA_028000, PMAA_008830, PMAA_080560
GO:0000469	cleavage involved in rRNA processing	-	0.0678195	2	114	28	7448	1	42	PMAA_060200, PMAA_064100
GO:0006732	coenzyme metabolic process	-	0.067908	5	114	143	7448	0.9907	42.6	PMAA_049350, PMAA_017210, PMAA_035660, PMAA_005610, PMAA_059640
GO:0006259	DNA metabolic process	-	0.0698642	13	114	542	7448	0.9759	42.94	PMAA_049350, PMAA_015260, PMAA_080560, PMAA_062210, PMAA_006540, PMAA_100160, PMAA_023440, PMAA_076660, PMAA_007900, PMAA_050290, PMAA_101020, PMAA_102310, PMAA_037580
GO:0006333	chromatin assembly or disassembly	-	0.0716401	3	114	63	7448	0.9724	43.76	PMAA_049350, PMAA_080560, PMAA_062210
GO:0070882	cellular cell wall organization or biogenesis	-	0.0855657	4	114	109	7448	1	46	PMAA_035260, PMAA_028000, PMAA_008830, PMAA_006690
GO:0051716	cellular response to stimulus	-	0.0948099	14	114	625	7448	1	47	PMAA_095250, PMAA_040090, PMAA_022080, PMAA_028000, PMAA_008830, PMAA_080560, PMAA_006930, PMAA_023440, PMAA_039680, PMAA_035110, PMAA_079340, PMAA_035260, PMAA_093920, PMAA_063480
GO:0009272	fungal-type cell wall biogenesis	-	0.094945	2	114	34	7448	1	48	PMAA_028000, PMAA_006690
GO:0019751	polyol metabolic process	-	0.094945	2	114	34	7448	1	49	PMAA_033510, PMAA_008830
GO:0000460	maturation of 5.8S rRNA	-	0.109492	2	114	37	7448	1	50	PMAA_060200, PMAA_064100
GO:0000466	maturation of 5.8S rRNA from tricistronic rRNA transcript (SSU-rRNA, 5.8S rRNA, LSU-rRNA)	-	0.109492	2	114	37	7448	1	51	PMAA_060200, PMAA_064100
GO:0006915	apoptotic process	-	0.109492	2	114	37	7448	1	52	PMAA_039680, PMAA_008830
GO:0012501	programmed cell death	-	0.109492	2	114	37	7448	1	53	PMAA_039680, PMAA_008830
GO:0050896	response to stimulus	-	0.109766	16	114	753	7448	1	54	PMAA_095250, PMAA_040090, PMAA_022080, PMAA_028000, PMAA_080560, PMAA_023440, PMAA_006930, PMAA_039680, PMAA_095560, PMAA_079340, PMAA_035260, PMAA_093920, PMAA_008830, PMAA_035110, PMAA_025670, PMAA_063480
GO:0030435	sporulation resulting in formation of a cellular spore	-	0.111619	4	114	120	7448	1	55	PMAA_006930, PMAA_082040, PMAA_035260, PMAA_028000
GO:0006633	fatty acid biosynthetic process	-	0.114465	2	114	38	7448	1	56	PMAA_005580, PMAA_091380
GO:0007047	cellular cell wall organization	-	0.116898	3	114	78	7448	1	57	PMAA_035260, PMAA_028000, PMAA_008830
GO:0045229	external encapsulating structure organization	-	0.116898	3	114	78	7448	1	58	PMAA_035260, PMAA_028000, PMAA_008830
GO:0046165	alcohol biosynthetic process	-	0.119496	2	114	39	7448	1	59	PMAA_017210, PMAA_019030
GO:0071555	cell wall organization	-	0.123593	3	114	80	7448	1	60	PMAA_035260, PMAA_028000, PMAA_008830
GO:0000462	maturation of SSU-rRNA from tricistronic rRNA transcript (SSU-rRNA, 5.8S rRNA, LSU-rRNA)	-	0.12458	2	114	40	7448	1	61	PMAA_060200, PMAA_064100
GO:0008219	cell death	-	0.12458	2	114	40	7448	1	62	PMAA_039680, PMAA_008830
GO:0016265	death	-	0.12458	2	114	40	7448	1	63	PMAA_039680, PMAA_008830
GO:0031497	chromatin assembly	-	0.134902	2	114	42	7448	1	64	PMAA_049350, PMAA_080560
GO:0032989	cellular component morphogenesis	-	0.137389	3	114	84	7448	1	65	PMAA_035260, PMAA_028000, PMAA_019030
GO:0030490	maturation of SSU-rRNA	-	0.140133	2	114	43	7448	1	66	PMAA_060200, PMAA_064100
GO:0046474	glycerophospholipid biosynthetic process	-	0.140133	2	114	43	7448	1	67	PMAA_022080, PMAA_019030
GO:0071470	cellular response to osmotic stress	-	0.140133	2	114	43	7448	1	68	PMAA_039680, PMAA_035260
GO:0006066	alcohol metabolic process	-	0.143558	4	114	132	7448	1	69	PMAA_033510, PMAA_017210, PMAA_008830, PMAA_019030
GO:0045017	glycerolipid biosynthetic process	-	0.150724	2	114	45	7448	1	70	PMAA_022080, PMAA_019030
GO:0051186	cofactor metabolic process	-	0.153482	5	114	185	7448	1	71	PMAA_049350, PMAA_017210, PMAA_035660, PMAA_005610, PMAA_059640
GO:0006338	chromatin remodeling	-	0.156078	2	114	46	7448	1	72	PMAA_049350, PMAA_080560
GO:0042493	response to drug	-	0.156078	2	114	46	7448	1	73	PMAA_039680, PMAA_028000
GO:0050794	regulation of cellular process	-	0.162007	23	114	1218	7448	1	74	PMAA_095250, PMAA_040090, PMAA_022080, PMAA_049350, PMAA_080560, PMAA_044270, PMAA_059640, PMAA_019030, PMAA_055980, PMAA_006930, PMAA_087990, PMAA_079340, PMAA_045180, PMAA_093920, PMAA_096670, PMAA_008830, PMAA_005580, PMAA_035110, PMAA_017210, PMAA_041070, PMAA_057640, PMAA_063480, PMAA_066500
GO:0030154	cell differentiation	-	0.16664	4	114	140	7448	1	75	PMAA_006930, PMAA_082040, PMAA_035260, PMAA_028000
GO:0034728	nucleosome organization	-	0.17235	2	114	49	7448	1	76	PMAA_049350, PMAA_080560
GO:0048869	cellular developmental process	-	0.173406	5	114	193	7448	1	77	PMAA_006930, PMAA_082040, PMAA_035260, PMAA_028000, PMAA_019030
GO:0005975	carbohydrate metabolic process	-	0.178442	10	114	468	7448	1	78	PMAA_074300, PMAA_049350, PMAA_017430, PMAA_033510, PMAA_008830, PMAA_039680, PMAA_035660, PMAA_035260, PMAA_064990, PMAA_006690
GO:0071554	cell wall organization or biogenesis	-	0.178655	4	114	144	7448	1	79	PMAA_035260, PMAA_028000, PMAA_008830, PMAA_006690
GO:0019954	asexual reproduction	-	0.181593	3	114	96	7448	1	80	PMAA_082040, PMAA_035260, PMAA_006690
GO:0042274	ribosomal small subunit biogenesis	-	0.183348	2	114	51	7448	1	81	PMAA_060200, PMAA_064100
GO:0048315	conidium formation	-	0.183348	2	114	51	7448	1	82	PMAA_082040, PMAA_035260
GO:0006310	DNA recombination	-	0.18477	4	114	146	7448	1	83	PMAA_100160, PMAA_023440, PMAA_007900, PMAA_102310
GO:0050789	regulation of biological process	-	0.185773	24	114	1302	7448	1	84	PMAA_095250, PMAA_040090, PMAA_022080, PMAA_049350, PMAA_080560, PMAA_044270, PMAA_059640, PMAA_019030, PMAA_055980, PMAA_006930, PMAA_087990, PMAA_079340, PMAA_045180, PMAA_093920, PMAA_096670, PMAA_008830, PMAA_005580, PMAA_035110, PMAA_017210, PMAA_025670, PMAA_041070, PMAA_057640, PMAA_063480, PMAA_066500
GO:0006007	glucose catabolic process	-	0.188885	2	114	52	7448	1	85	PMAA_049350, PMAA_039680
GO:0009653	anatomical structure morphogenesis	-	0.194278	5	114	201	7448	1	86	PMAA_006930, PMAA_082040, PMAA_035260, PMAA_028000, PMAA_019030
GO:0006970	response to osmotic stress	-	0.194446	2	114	53	7448	1	87	PMAA_039680, PMAA_035260
GO:0030003	cellular cation homeostasis	-	0.194446	2	114	53	7448	1	88	PMAA_041270, PMAA_044270
GO:0048646	anatomical structure formation involved in morphogenesis	-	0.197205	4	114	150	7448	1	89	PMAA_006930, PMAA_082040, PMAA_035260, PMAA_028000
Ontology Aspect: Function
GO ID	TERM	CORRECTED PVALUE	UNCORRECTED PVALUE	NUM LIST ANNOTATIONS	LIST SIZE	TOTAL NUM ANNOTATIONS	POPULATION SIZE	FDR RATE	EXPECTED FALSE POSITIVES	P. marneffei Gene Model ID
GO:XXXXXXX	unannotated	-	0.000227417	29	114	969	7448	0.08	0.08	PMAA_074840, PMAA_022080, PMAA_040890, PMAA_019770, PMAA_028000, PMAA_041320, PMAA_097290, PMAA_072140, PMAA_075860, PMAA_019010, PMAA_076680, PMAA_079340, PMAA_028120, PMAA_020890, PMAA_040500, PMAA_088670, PMAA_066040, PMAA_101620, PMAA_017640, PMAA_042070, PMAA_066580, PMAA_008220, PMAA_090730, PMAA_012160, PMAA_079130, PMAA_101530, PMAA_004490, PMAA_076380, PMAA_035770
GO:0004321	fatty-acyl-CoA synthase activity	-	0.00225344	2	114	5	7448	0.59	1.18	PMAA_005580, PMAA_091380
GO:0046912	transferase activity, transferring acyl groups, acyl groups converted into alkyl on transfer	-	0.00964502	2	114	10	7448	1	3	PMAA_017210, PMAA_035660
GO:0004316	3-oxoacyl-[acyl-carrier-protein] reductase (NADPH) activity	-	0.0138666	2	114	12	7448	1	4	PMAA_005580, PMAA_065580
GO:0000155	two-component sensor activity	-	0.0187422	2	114	14	7448	1	5	PMAA_035110, PMAA_093920
GO:0004673	protein histidine kinase activity	-	0.0187422	2	114	14	7448	0.9567	5.74	PMAA_035110, PMAA_093920
GO:0016775	phosphotransferase activity, nitrogenous group as acceptor	-	0.0187422	2	114	14	7448	0.82	5.74	PMAA_035110, PMAA_093920
GO:0016408	C-acyltransferase activity	-	0.0271889	2	114	17	7448	0.8825	7.06	PMAA_005580, PMAA_091380
GO:0016780	phosphotransferase activity, for other substituted phosphate groups	-	0.0271889	2	114	17	7448	0.7844	7.06	PMAA_023330, PMAA_005580
GO:0004312	fatty acid synthase activity	-	0.0403561	2	114	21	7448	0.982	9.82	PMAA_005580, PMAA_065580
GO:0016638	oxidoreductase activity, acting on the CH-NH2 group of donors	-	0.0439566	2	114	22	7448	1	11	PMAA_028730, PMAA_043430
GO:0038023	signaling receptor activity	-	0.0439566	2	114	22	7448	0.92	11.04	PMAA_035110, PMAA_093920
GO:0004871	signal transducer activity	-	0.0449049	3	114	52	7448	0.8646	11.24	PMAA_006930, PMAA_035110, PMAA_093920
GO:0060089	molecular transducer activity	-	0.0449049	3	114	52	7448	0.8029	11.24	PMAA_006930, PMAA_035110, PMAA_093920
GO:0016891	endoribonuclease activity, producing 5'-phosphomonoesters	-	0.049317	3	114	54	7448	0.788	11.82	PMAA_008830, PMAA_101020, PMAA_066500
GO:0008237	metallopeptidase activity	-	0.0539334	3	114	56	7448	0.7925	12.68	PMAA_095670, PMAA_093920, PMAA_044710
GO:0008422	beta-glucosidase activity	-	0.0594622	2	114	26	7448	0.7894	13.42	PMAA_074300, PMAA_017430
GO:0016893	endonuclease activity, active with either ribo- or deoxyribonucleic acids and producing 5'-phosphomonoesters	-	0.0612322	3	114	59	7448	0.7522	13.54	PMAA_008830, PMAA_101020, PMAA_066500
GO:0004521	endoribonuclease activity	-	0.0637629	3	114	60	7448	0.7547	14.34	PMAA_008830, PMAA_101020, PMAA_066500
GO:0005509	calcium ion binding	-	0.0771233	3	114	65	7448	0.835	16.7	PMAA_095250, PMAA_064990, PMAA_019030
GO:0003676	nucleic acid binding	-	0.0866734	29	114	1481	7448	0.8676	18.22	PMAA_060200, PMAA_049350, PMAA_036890, PMAA_080560, PMAA_044270, PMAA_059640, PMAA_006540, PMAA_023440, PMAA_009150, PMAA_087990, PMAA_050290, PMAA_045180, PMAA_101020, PMAA_102310, PMAA_037580, PMAA_096670, PMAA_015260, PMAA_102470, PMAA_062210, PMAA_100160, PMAA_024190, PMAA_076660, PMAA_064100, PMAA_070510, PMAA_007900, PMAA_000780, PMAA_025670, PMAA_057640, PMAA_066500
GO:0003677	DNA binding	-	0.103384	18	114	860	7448	0.9127	20.08	PMAA_049350, PMAA_080560, PMAA_044270, PMAA_059640, PMAA_006540, PMAA_023440, PMAA_087990, PMAA_050290, PMAA_045180, PMAA_037580, PMAA_015260, PMAA_062210, PMAA_076660, PMAA_007900, PMAA_070510, PMAA_000780, PMAA_057640, PMAA_066500
GO:0016788	hydrolase activity, acting on ester bonds	-	0.108795	9	114	367	7448	0.9	20.7	PMAA_040090, PMAA_095560, PMAA_005580, PMAA_041070, PMAA_008830, PMAA_101020, PMAA_045180, PMAA_053530, PMAA_066500
GO:0042802	identical protein binding	-	0.109492	2	114	37	7448	0.8783	21.08	PMAA_035110, PMAA_008830
GO:0004540	ribonuclease activity	-	0.126993	3	114	81	7448	0.9328	23.32	PMAA_008830, PMAA_101020, PMAA_066500
GO:0004518	nuclease activity	-	0.132534	4	114	128	7448	0.9323	24.24	PMAA_008830, PMAA_101020, PMAA_045180, PMAA_066500
GO:0016787	hydrolase activity	-	0.139876	29	114	1557	7448	0.917	24.76	PMAA_040090, PMAA_053000, PMAA_017430, PMAA_041270, PMAA_080560, PMAA_041760, PMAA_095560, PMAA_035260, PMAA_045180, PMAA_101020, PMAA_102310, PMAA_093920, PMAA_064990, PMAA_006690, PMAA_095670, PMAA_074300, PMAA_008830, PMAA_059370, PMAA_100160, PMAA_010220, PMAA_058210, PMAA_005580, PMAA_035110, PMAA_007900, PMAA_041070, PMAA_084770, PMAA_053530, PMAA_066500, PMAA_044710
GO:0003682	chromatin binding	-	0.145408	2	114	44	7448	0.9521	26.66	PMAA_080560, PMAA_062210
GO:0004721	phosphoprotein phosphatase activity	-	0.145408	2	114	44	7448	0.9193	26.66	PMAA_040090, PMAA_041070
GO:0015926	glucosidase activity	-	0.145408	2	114	44	7448	0.8887	26.66	PMAA_074300, PMAA_017430
GO:0046983	protein dimerization activity	-	0.148068	3	114	87	7448	0.8665	26.86	PMAA_008830, PMAA_057640, PMAA_066500
GO:0016903	oxidoreductase activity, acting on the aldehyde or oxo group of donors	-	0.150724	2	114	45	7448	0.8588	27.48	PMAA_039680, PMAA_005610
GO:0004519	endonuclease activity	-	0.159008	3	114	90	7448	0.8558	28.24	PMAA_008830, PMAA_101020, PMAA_066500
GO:0008236	serine-type peptidase activity	-	0.177835	2	114	50	7448	0.8906	30.28	PMAA_035110, PMAA_084770
GO:0017171	serine hydrolase activity	-	0.177835	2	114	50	7448	0.8651	30.28	PMAA_035110, PMAA_084770
GO:0004386	helicase activity	-	0.181704	4	114	145	7448	0.8533	30.72	PMAA_100160, PMAA_007900, PMAA_080560, PMAA_102310
GO:0004672	protein kinase activity	-	0.190955	4	114	148	7448	0.8805	32.58	PMAA_035110, PMAA_008830, PMAA_079710, PMAA_093920
GO:0000166	nucleotide binding	-	0.191847	22	114	1186	7448	0.8595	32.66	PMAA_063000, PMAA_053000, PMAA_033510, PMAA_036890, PMAA_080560, PMAA_023440, PMAA_006930, PMAA_039680, PMAA_035660, PMAA_035260, PMAA_079710, PMAA_102310, PMAA_093920, PMAA_037580, PMAA_075990, PMAA_008830, PMAA_100160, PMAA_028730, PMAA_005580, PMAA_035110, PMAA_007900, PMAA_044710

## Sheet: Cluster 3
Table S7. GO associations for early and late expression clusters.
Ontology Aspect: Process
GO ID	TERM	CORRECTED PVALUE	UNCORRECTED PVALUE	NUM LIST ANNOTATIONS	LIST SIZE	TOTAL NUM ANNOTATIONS	POPULATION SIZE	FDR RATE	EXPECTED FALSE POSITIVES	P. marneffei Gene Model ID
GO:0006412	translation	-	5.58377e-07	18	95	363	7448	0	0	PMAA_090940, PMAA_094650, PMAA_055500, PMAA_003040, PMAA_053340, PMAA_060070, PMAA_054810, PMAA_080350, PMAA_046890, PMAA_002720, PMAA_016360, PMAA_047150, PMAA_082670, PMAA_054240, PMAA_026340, PMAA_026430, PMAA_084260, PMAA_086350
GO:0006414	translational elongation	-	2.00341e-05	6	95	45	7448	0	0	PMAA_094650, PMAA_060070, PMAA_002720, PMAA_016360, PMAA_054810, PMAA_026430
GO:0009058	biosynthetic process	-	4.3615e-05	43	95	1953	7448	0	0	PMAA_090940, PMAA_086380, PMAA_022840, PMAA_006650, PMAA_068140, PMAA_046420, PMAA_003040, PMAA_013020, PMAA_053350, PMAA_053340, PMAA_060070, PMAA_019850, PMAA_065680, PMAA_080350, PMAA_079980, PMAA_016360, PMAA_009290, PMAA_047150, PMAA_024740, PMAA_081090, PMAA_034090, PMAA_026340, PMAA_042500, PMAA_040230, PMAA_021000, PMAA_086350, PMAA_094650, PMAA_055500, PMAA_093830, PMAA_076130, PMAA_0414…
GO:0071843	cellular component biogenesis at cellular level	-	0.000255396	11	95	244	7448	0.04	0.16	PMAA_090940, PMAA_022840, PMAA_037600, PMAA_002720, PMAA_039430, PMAA_016360, PMAA_053340, PMAA_047150, PMAA_045360, PMAA_005510, PMAA_026340
GO:0044249	cellular biosynthetic process	-	0.00033397	39	95	1847	7448	0.04	0.2	PMAA_090940, PMAA_086380, PMAA_022840, PMAA_068140, PMAA_046420, PMAA_003040, PMAA_013020, PMAA_053350, PMAA_053340, PMAA_060070, PMAA_019850, PMAA_080350, PMAA_079980, PMAA_016360, PMAA_009290, PMAA_024740, PMAA_047150, PMAA_081090, PMAA_034090, PMAA_026340, PMAA_042500, PMAA_040230, PMAA_086350, PMAA_094650, PMAA_055500, PMAA_093830, PMAA_076130, PMAA_014300, PMAA_054810, PMAA_063950, PMAA_0468…
GO:0042254	ribosome biogenesis	-	0.000383991	9	95	176	7448	0.0333	0.2	PMAA_090940, PMAA_002720, PMAA_039430, PMAA_016360, PMAA_053340, PMAA_047150, PMAA_045360, PMAA_005510, PMAA_026340
GO:0006102	isocitrate metabolic process	-	0.000478983	2	95	3	7448	0.0571	0.4	PMAA_068140, PMAA_046420
GO:0045903	positive regulation of translational fidelity	-	0.000478983	2	95	3	7448	0.05	0.4	PMAA_002720, PMAA_016360
GO:0045727	positive regulation of translation	-	0.000524099	3	95	13	7448	0.0511	0.46	PMAA_002720, PMAA_016360, PMAA_054810
GO:0022613	ribonucleoprotein complex biogenesis	-	0.000723511	9	95	192	7448	0.056	0.56	PMAA_090940, PMAA_002720, PMAA_039430, PMAA_016360, PMAA_053340, PMAA_047150, PMAA_045360, PMAA_005510, PMAA_026340
GO:0006448	regulation of translational elongation	-	0.000818495	3	95	15	7448	0.0509	0.56	PMAA_002720, PMAA_016360, PMAA_054810
GO:0034660	ncRNA metabolic process	-	0.00094284	10	95	241	7448	0.0483	0.58	PMAA_032390, PMAA_080350, PMAA_002720, PMAA_039430, PMAA_047150, PMAA_045360, PMAA_082670, PMAA_005510, PMAA_086350, PMAA_084260
GO:0044085	cellular component biogenesis	-	0.00101363	15	95	480	7448	0.0585	0.76	PMAA_090940, PMAA_040640, PMAA_022840, PMAA_037600, PMAA_002720, PMAA_039430, PMAA_016360, PMAA_018930, PMAA_053340, PMAA_085020, PMAA_045360, PMAA_047150, PMAA_022480, PMAA_005510, PMAA_026340
GO:0006997	nucleus organization	-	0.0022635	3	95	21	7448	0.1057	1.48	PMAA_085020, PMAA_022480, PMAA_063460
GO:0000103	sulfate assimilation	-	0.0023357	2	95	6	7448	0.1067	1.6	PMAA_042500, PMAA_029890
GO:0006520	cellular amino acid metabolic process	-	0.00270747	11	95	325	7448	0.1112	1.78	PMAA_080350, PMAA_079980, PMAA_068140, PMAA_046420, PMAA_082670, PMAA_014300, PMAA_034090, PMAA_054810, PMAA_042500, PMAA_086350, PMAA_084260
GO:0006418	tRNA aminoacylation for protein translation	-	0.00339366	4	95	49	7448	0.1424	2.42	PMAA_082670, PMAA_080350, PMAA_084260, PMAA_086350
GO:0043038	amino acid activation	-	0.00392593	4	95	51	7448	0.1467	2.64	PMAA_082670, PMAA_080350, PMAA_084260, PMAA_086350
GO:0043039	tRNA aminoacylation	-	0.00392593	4	95	51	7448	0.1389	2.64	PMAA_082670, PMAA_080350, PMAA_084260, PMAA_086350
GO:0006450	regulation of translational fidelity	-	0.00428798	2	95	8	7448	0.154	3.08	PMAA_002720, PMAA_016360
GO:0044267	cellular protein metabolic process	-	0.00434037	22	95	967	7448	0.1467	3.08	PMAA_090940, PMAA_078420, PMAA_094650, PMAA_055500, PMAA_003040, PMAA_053340, PMAA_085020, PMAA_076130, PMAA_060070, PMAA_054810, PMAA_080350, PMAA_046890, PMAA_002720, PMAA_016360, PMAA_094010, PMAA_047150, PMAA_082670, PMAA_054240, PMAA_026340, PMAA_026430, PMAA_084260, PMAA_086350
GO:0006537	glutamate biosynthetic process	-	0.00546747	2	95	9	7448	0.1736	3.82	PMAA_068140, PMAA_046420
GO:0070925	organelle assembly	-	0.00585587	4	95	57	7448	0.1791	4.12	PMAA_090940, PMAA_053340, PMAA_085020, PMAA_022480
GO:0009891	positive regulation of biosynthetic process	-	0.00595626	5	95	91	7448	0.175	4.2	PMAA_076130, PMAA_002720, PMAA_034090, PMAA_016360, PMAA_054810
GO:0031328	positive regulation of cellular biosynthetic process	-	0.00595626	5	95	91	7448	0.168	4.2	PMAA_076130, PMAA_002720, PMAA_034090, PMAA_016360, PMAA_054810
GO:0044281	small molecule metabolic process	-	0.00619145	22	95	996	7448	0.1638	4.26	PMAA_094650, PMAA_002470, PMAA_068140, PMAA_046420, PMAA_093830, PMAA_042280, PMAA_027680, PMAA_014300, PMAA_054810, PMAA_037460, PMAA_063950, PMAA_080350, PMAA_079980, PMAA_009290, PMAA_082670, PMAA_081090, PMAA_063460, PMAA_034090, PMAA_042500, PMAA_040230, PMAA_086350, PMAA_084260
GO:0006407	rRNA export from nucleus	-	0.00677781	2	95	10	7448	0.1837	4.96	PMAA_016360, PMAA_026340
GO:0051029	rRNA transport	-	0.00677781	2	95	10	7448	0.1771	4.96	PMAA_016360, PMAA_026340
GO:0006221	pyrimidine nucleotide biosynthetic process	-	0.00821554	2	95	11	7448	0.1979	5.74	PMAA_093830, PMAA_063950
GO:0009396	folic acid-containing compound biosynthetic process	-	0.00821554	2	95	11	7448	0.1913	5.74	PMAA_009290, PMAA_014300
GO:0042398	cellular modified amino acid biosynthetic process	-	0.00903711	3	95	34	7448	0.1974	6.12	PMAA_014300, PMAA_079980, PMAA_054810
GO:0034645	cellular macromolecule biosynthetic process	-	0.00970159	27	95	1360	7448	0.1981	6.34	PMAA_090940, PMAA_094650, PMAA_055500, PMAA_022840, PMAA_003040, PMAA_013020, PMAA_053350, PMAA_053340, PMAA_060070, PMAA_054810, PMAA_019850, PMAA_080350, PMAA_037600, PMAA_046890, PMAA_002720, PMAA_016360, PMAA_018930, PMAA_024740, PMAA_047150, PMAA_082670, PMAA_054240, PMAA_034090, PMAA_026340, PMAA_026430, PMAA_016120, PMAA_086350, PMAA_084260
GO:0006220	pyrimidine nucleotide metabolic process	-	0.00977727	2	95	12	7448	0.203	6.7	PMAA_093830, PMAA_063950
GO:0006760	folic acid-containing compound metabolic process	-	0.00977727	2	95	12	7448	0.1971	6.7	PMAA_009290, PMAA_014300
GO:0072528	pyrimidine-containing compound biosynthetic process	-	0.00977727	2	95	12	7448	0.1914	6.7	PMAA_093830, PMAA_063950
GO:0009059	macromolecule biosynthetic process	-	0.0106819	27	95	1370	7448	0.1967	7.08	PMAA_090940, PMAA_094650, PMAA_055500, PMAA_022840, PMAA_003040, PMAA_013020, PMAA_053350, PMAA_053340, PMAA_060070, PMAA_054810, PMAA_019850, PMAA_080350, PMAA_037600, PMAA_046890, PMAA_002720, PMAA_016360, PMAA_018930, PMAA_024740, PMAA_047150, PMAA_082670, PMAA_054240, PMAA_034090, PMAA_026340, PMAA_026430, PMAA_016120, PMAA_086350, PMAA_084260
GO:0010467	gene expression	-	0.0108004	28	95	1438	7448	0.193	7.14	PMAA_090940, PMAA_094650, PMAA_055500, PMAA_003040, PMAA_013020, PMAA_053350, PMAA_053340, PMAA_045360, PMAA_060070, PMAA_054810, PMAA_032390, PMAA_019850, PMAA_080350, PMAA_046890, PMAA_002720, PMAA_039430, PMAA_016360, PMAA_024740, PMAA_047150, PMAA_082670, PMAA_054240, PMAA_005510, PMAA_026340, PMAA_034090, PMAA_016120, PMAA_026430, PMAA_086350, PMAA_084260
GO:0032270	positive regulation of cellular protein metabolic process	-	0.0122825	3	95	38	7448	0.2221	8.44	PMAA_002720, PMAA_016360, PMAA_054810
GO:0019538	protein metabolic process	-	0.0129915	23	95	1127	7448	0.2231	8.7	PMAA_090940, PMAA_078420, PMAA_094650, PMAA_055500, PMAA_003040, PMAA_053340, PMAA_085020, PMAA_076130, PMAA_060070, PMAA_054810, PMAA_065680, PMAA_080350, PMAA_046890, PMAA_002720, PMAA_016360, PMAA_094010, PMAA_047150, PMAA_082670, PMAA_054240, PMAA_026340, PMAA_026430, PMAA_086350, PMAA_084260
GO:0006012	galactose metabolic process	-	0.0132595	2	95	14	7448	0.2405	9.62	PMAA_022840, PMAA_027680
GO:0006536	glutamate metabolic process	-	0.0132595	2	95	14	7448	0.2346	9.62	PMAA_068140, PMAA_046420
GO:0051247	positive regulation of protein metabolic process	-	0.0141246	3	95	40	7448	0.24	10.08	PMAA_002720, PMAA_016360, PMAA_054810
GO:0019752	carboxylic acid metabolic process	-	0.0142186	12	95	463	7448	0.2353	10.12	PMAA_037460, PMAA_080350, PMAA_079980, PMAA_068140, PMAA_046420, PMAA_082670, PMAA_014300, PMAA_034090, PMAA_042500, PMAA_054810, PMAA_086350, PMAA_084260
GO:0043436	oxoacid metabolic process	-	0.0142186	12	95	463	7448	0.23	10.12	PMAA_037460, PMAA_080350, PMAA_079980, PMAA_068140, PMAA_046420, PMAA_082670, PMAA_014300, PMAA_034090, PMAA_042500, PMAA_054810, PMAA_086350, PMAA_084260
GO:0006082	organic acid metabolic process	-	0.0146713	12	95	465	7448	0.2271	10.22	PMAA_037460, PMAA_080350, PMAA_079980, PMAA_068140, PMAA_046420, PMAA_082670, PMAA_014300, PMAA_034090, PMAA_042500, PMAA_054810, PMAA_086350, PMAA_084260
GO:0051278	fungal-type cell wall polysaccharide biosynthetic process	-	0.0151735	2	95	15	7448	0.2339	10.76	PMAA_022840, PMAA_037600
GO:0071966	fungal-type cell wall polysaccharide metabolic process	-	0.0151735	2	95	15	7448	0.2289	10.76	PMAA_022840, PMAA_037600
GO:0018130	heterocycle biosynthetic process	-	0.0162495	7	95	207	7448	0.2312	11.1	PMAA_009290, PMAA_093830, PMAA_063950, PMAA_076130, PMAA_014300, PMAA_040230, PMAA_018930
GO:0010557	positive regulation of macromolecule biosynthetic process	-	0.0165501	4	95	77	7448	0.2282	11.18	PMAA_002720, PMAA_034090, PMAA_016360, PMAA_054810
GO:0031325	positive regulation of cellular metabolic process	-	0.0171479	5	95	118	7448	0.2304	11.52	PMAA_076130, PMAA_002720, PMAA_034090, PMAA_016360, PMAA_054810
GO:0006575	cellular modified amino acid metabolic process	-	0.0171668	3	95	43	7448	0.2294	11.7	PMAA_014300, PMAA_079980, PMAA_054810
GO:0008652	cellular amino acid biosynthetic process	-	0.017576	6	95	163	7448	0.2423	12.6	PMAA_014300, PMAA_079980, PMAA_068140, PMAA_046420, PMAA_042500, PMAA_054810
GO:0042180	cellular ketone metabolic process	-	0.0176237	12	95	477	7448	0.2381	12.62	PMAA_037460, PMAA_080350, PMAA_079980, PMAA_068140, PMAA_046420, PMAA_082670, PMAA_014300, PMAA_034090, PMAA_042500, PMAA_054810, PMAA_086350, PMAA_084260
GO:0009893	positive regulation of metabolic process	-	0.0177242	5	95	119	7448	0.2344	12.66	PMAA_076130, PMAA_002720, PMAA_034090, PMAA_016360, PMAA_054810
GO:0006364	rRNA processing	-	0.0189149	5	95	121	7448	0.2375	13.06	PMAA_045360, PMAA_047150, PMAA_005510, PMAA_002720, PMAA_039430
GO:0016072	rRNA metabolic process	-	0.0189149	5	95	121	7448	0.2332	13.06	PMAA_045360, PMAA_047150, PMAA_005510, PMAA_002720, PMAA_039430
GO:0006417	regulation of translation	-	0.0193827	3	95	45	7448	0.2456	14	PMAA_002720, PMAA_016360, PMAA_054810
GO:0034654	nucleobase-containing compound biosynthetic process	-	0.0201574	5	95	123	7448	0.2466	14.3	PMAA_009290, PMAA_093830, PMAA_063950, PMAA_086380, PMAA_040230
GO:0044271	cellular nitrogen compound biosynthetic process	-	0.020978	7	95	218	7448	0.2502	14.76	PMAA_009290, PMAA_093830, PMAA_063950, PMAA_086380, PMAA_014300, PMAA_040230, PMAA_018930
GO:0070592	cell wall polysaccharide biosynthetic process	-	0.0215695	2	95	18	7448	0.2643	15.86	PMAA_022840, PMAA_037600
GO:0006399	tRNA metabolic process	-	0.0221197	5	95	126	7448	0.2656	16.2	PMAA_032390, PMAA_082670, PMAA_080350, PMAA_084260, PMAA_086350
GO:0006144	purine nucleobase metabolic process	-	0.0239095	2	95	19	7448	0.2771	17.18	PMAA_009290, PMAA_040230
GO:0042559	pteridine-containing compound biosynthetic process	-	0.0263485	2	95	20	7448	0.2914	18.36	PMAA_009290, PMAA_014300
GO:0072527	pyrimidine-containing compound metabolic process	-	0.0263485	2	95	20	7448	0.2869	18.36	PMAA_093830, PMAA_063950
GO:0044237	cellular metabolic process	-	0.0268386	54	95	3463	7448	0.2846	18.5	PMAA_090940, PMAA_086380, PMAA_078420, PMAA_022840, PMAA_006650, PMAA_002470, PMAA_068140, PMAA_046420, PMAA_003040, PMAA_013020, PMAA_053350, PMAA_053340, PMAA_085020, PMAA_045360, PMAA_027680, PMAA_060070, PMAA_037460, PMAA_019850, PMAA_065680, PMAA_080350, PMAA_079980, PMAA_016360, PMAA_094010, PMAA_009290, PMAA_047150, PMAA_024740, PMAA_033130, PMAA_081090, PMAA_005510, PMAA_034090, PMAA_0263…
GO:0000920	cytokinetic cell separation	-	0.0288838	2	95	21	7448	0.2912	19.22	PMAA_085020, PMAA_037600
GO:0042558	pteridine-containing compound metabolic process	-	0.0288838	2	95	21	7448	0.2869	19.22	PMAA_009290, PMAA_014300
GO:0051186	cofactor metabolic process	-	0.0304572	6	95	185	7448	0.2909	19.78	PMAA_009290, PMAA_014300, PMAA_079980, PMAA_068140, PMAA_046420, PMAA_018930
GO:0042173	regulation of sporulation resulting in formation of a cellular spore	-	0.0315125	2	95	22	7448	0.3009	20.76	PMAA_076130, PMAA_010380
GO:0045023	G0 to G1 transition	-	0.0315125	2	95	22	7448	0.2966	20.76	PMAA_093830, PMAA_081090
GO:0070316	regulation of G0 to G1 transition	-	0.0315125	2	95	22	7448	0.2924	20.76	PMAA_093830, PMAA_081090
GO:0070317	negative regulation of G0 to G1 transition	-	0.0315125	2	95	22	7448	0.2883	20.76	PMAA_093830, PMAA_081090
GO:0048522	positive regulation of cellular process	-	0.0318706	6	95	187	7448	0.2844	20.76	PMAA_076130, PMAA_010380, PMAA_002720, PMAA_034090, PMAA_016360, PMAA_054810
GO:0034470	ncRNA processing	-	0.0340702	6	95	190	7448	0.2854	21.12	PMAA_032390, PMAA_045360, PMAA_047150, PMAA_005510, PMAA_002720, PMAA_039430
GO:0000320	re-entry into mitotic cell cycle	-	0.0342318	2	95	23	7448	0.2883	21.62	PMAA_093830, PMAA_081090
GO:0006732	coenzyme metabolic process	-	0.0355825	5	95	143	7448	0.2916	22.16	PMAA_009290, PMAA_014300, PMAA_079980, PMAA_068140, PMAA_046420
GO:0010608	posttranscriptional regulation of gene expression	-	0.035848	3	95	57	7448	0.2894	22.28	PMAA_002720, PMAA_016360, PMAA_054810
GO:0000027	ribosomal large subunit assembly	-	0.0370392	2	95	24	7448	0.299	23.32	PMAA_090940, PMAA_053340
GO:0045595	regulation of cell differentiation	-	0.0370392	2	95	24	7448	0.2952	23.32	PMAA_076130, PMAA_010380
GO:0006099	tricarboxylic acid cycle	-	0.039932	2	95	25	7448	0.3098	24.78	PMAA_068140, PMAA_046420
GO:0009084	glutamine family amino acid biosynthetic process	-	0.039932	2	95	25	7448	0.3059	24.78	PMAA_068140, PMAA_046420
GO:0009109	coenzyme catabolic process	-	0.039932	2	95	25	7448	0.3022	24.78	PMAA_068140, PMAA_046420
GO:0044038	cell wall macromolecule biosynthetic process	-	0.039932	2	95	25	7448	0.2986	24.78	PMAA_022840, PMAA_037600
GO:0046356	acetyl-CoA catabolic process	-	0.039932	2	95	25	7448	0.295	24.78	PMAA_068140, PMAA_046420
GO:0070589	cellular component macromolecule biosynthetic process	-	0.039932	2	95	25	7448	0.2915	24.78	PMAA_022840, PMAA_037600
GO:0006725	cellular aromatic compound metabolic process	-	0.0413252	5	95	149	7448	0.2944	25.32	PMAA_009290, PMAA_076130, PMAA_014300, PMAA_034090, PMAA_040230
GO:0051187	cofactor catabolic process	-	0.0429075	2	95	26	7448	0.3	26.1	PMAA_068140, PMAA_046420
GO:0075306	regulation of conidium formation	-	0.0429075	2	95	26	7448	0.2966	26.1	PMAA_076130, PMAA_010380
GO:0048518	positive regulation of biological process	-	0.0438461	6	95	202	7448	0.2957	26.32	PMAA_076130, PMAA_010380, PMAA_002720, PMAA_034090, PMAA_016360, PMAA_054810
GO:0071841	cellular component organization or biogenesis at cellular level	-	0.045605	18	95	932	7448	0.296	26.64	PMAA_090940, PMAA_094650, PMAA_022840, PMAA_053340, PMAA_085020, PMAA_045360, PMAA_022480, PMAA_054810, PMAA_040640, PMAA_037600, PMAA_002720, PMAA_016360, PMAA_039430, PMAA_018930, PMAA_047150, PMAA_063460, PMAA_005510, PMAA_026340
GO:0010604	positive regulation of macromolecule metabolic process	-	0.0474247	4	95	107	7448	0.3059	27.84	PMAA_002720, PMAA_034090, PMAA_016360, PMAA_054810
GO:0044238	primary metabolic process	-	0.0515158	54	95	3576	7448	0.3154	29.02	PMAA_090940, PMAA_086380, PMAA_078420, PMAA_022840, PMAA_006650, PMAA_002470, PMAA_068140, PMAA_046420, PMAA_003040, PMAA_013020, PMAA_053350, PMAA_053340, PMAA_085020, PMAA_045360, PMAA_027680, PMAA_060070, PMAA_037460, PMAA_019850, PMAA_065680, PMAA_080350, PMAA_079980, PMAA_016360, PMAA_094010, PMAA_009290, PMAA_047150, PMAA_024740, PMAA_022200, PMAA_081090, PMAA_005510, PMAA_034090, PMAA_0263…
GO:0010948	negative regulation of cell cycle process	-	0.0516983	3	95	66	7448	0.314	29.2	PMAA_093830, PMAA_085020, PMAA_081090
GO:0009112	nucleobase metabolic process	-	0.0523056	2	95	29	7448	0.3162	29.72	PMAA_009290, PMAA_040230
GO:0046148	pigment biosynthetic process	-	0.0555874	2	95	30	7448	0.3259	30.96	PMAA_009290, PMAA_018930
GO:0071845	cellular component disassembly at cellular level	-	0.0555874	2	95	30	7448	0.3225	30.96	PMAA_037600, PMAA_054810
GO:0044283	small molecule biosynthetic process	-	0.0582061	7	95	272	7448	0.3287	31.88	PMAA_081090, PMAA_014300, PMAA_079980, PMAA_068140, PMAA_046420, PMAA_042500, PMAA_054810
GO:0010382	cellular cell wall macromolecule metabolic process	-	0.0589398	2	95	31	7448	0.3371	33.04	PMAA_022840, PMAA_037600
GO:0034305	regulation of asexual sporulation	-	0.0589398	2	95	31	7448	0.3337	33.04	PMAA_076130, PMAA_010380
GO:0016053	organic acid biosynthetic process	-	0.0615406	6	95	220	7448	0.335	33.5	PMAA_014300, PMAA_079980, PMAA_068140, PMAA_046420, PMAA_042500, PMAA_054810
GO:0046394	carboxylic acid biosynthetic process	-	0.0615406	6	95	220	7448	0.3317	33.5	PMAA_014300, PMAA_079980, PMAA_068140, PMAA_046420, PMAA_042500, PMAA_054810
GO:0051188	cofactor biosynthetic process	-	0.06199	4	95	117	7448	0.3347	34.14	PMAA_009290, PMAA_014300, PMAA_079980, PMAA_018930
GO:0022411	cellular component disassembly	-	0.0623606	2	95	32	7448	0.3425	35.28	PMAA_037600, PMAA_054810
GO:0006084	acetyl-CoA metabolic process	-	0.0658473	2	95	33	7448	0.3496	36.36	PMAA_068140, PMAA_046420
GO:0009124	nucleoside monophosphate biosynthetic process	-	0.0658473	2	95	33	7448	0.3463	36.36	PMAA_063950, PMAA_040230
GO:0009123	nucleoside monophosphate metabolic process	-	0.069398	2	95	34	7448	0.3655	38.74	PMAA_063950, PMAA_040230
GO:0009272	fungal-type cell wall biogenesis	-	0.069398	2	95	34	7448	0.3621	38.74	PMAA_022840, PMAA_037600
GO:0030436	asexual sporulation	-	0.0726227	3	95	76	7448	0.3728	40.26	PMAA_076130, PMAA_010380, PMAA_079960
GO:0009108	coenzyme biosynthetic process	-	0.0748959	3	95	77	7448	0.3859	42.06	PMAA_009290, PMAA_014300, PMAA_079980
GO:0006405	RNA export from nucleus	-	0.0766823	2	95	36	7448	0.388	42.68	PMAA_016360, PMAA_026340
GO:0015931	nucleobase-containing compound transport	-	0.0772007	3	95	78	7448	0.3877	43.04	PMAA_016360, PMAA_026340, PMAA_038990
GO:0033692	cellular polysaccharide biosynthetic process	-	0.0804117	2	95	37	7448	0.4	44.8	PMAA_022840, PMAA_037600
GO:0042255	ribosome assembly	-	0.0804117	2	95	37	7448	0.3965	44.8	PMAA_090940, PMAA_053340
GO:0042440	pigment metabolic process	-	0.0804117	2	95	37	7448	0.393	44.8	PMAA_009290, PMAA_018930
GO:0009110	vitamin biosynthetic process	-	0.0841967	2	95	38	7448	0.4012	46.14	PMAA_014300, PMAA_079980
GO:0042364	water-soluble vitamin biosynthetic process	-	0.0841967	2	95	38	7448	0.3978	46.14	PMAA_014300, PMAA_079980
GO:0016051	carbohydrate biosynthetic process	-	0.0843	3	95	81	7448	0.3952	46.24	PMAA_022840, PMAA_037600, PMAA_006650
GO:0006913	nucleocytoplasmic transport	-	0.086727	3	95	82	7448	0.3966	46.8	PMAA_063460, PMAA_016360, PMAA_026340
GO:0051169	nuclear transport	-	0.086727	3	95	82	7448	0.3933	46.8	PMAA_063460, PMAA_016360, PMAA_026340
GO:0006302	double-strand break repair	-	0.0880351	2	95	39	7448	0.4005	48.06	PMAA_032390, PMAA_018930
GO:0006766	vitamin metabolic process	-	0.0880351	2	95	39	7448	0.3972	48.06	PMAA_014300, PMAA_079980
GO:0006767	water-soluble vitamin metabolic process	-	0.0880351	2	95	39	7448	0.3939	48.06	PMAA_014300, PMAA_079980
GO:0043937	regulation of sporulation	-	0.0880351	2	95	39	7448	0.3907	48.06	PMAA_076130, PMAA_010380
GO:0071840	cellular component organization or biogenesis	-	0.0924955	18	95	1020	7448	0.4016	49.8	PMAA_090940, PMAA_094650, PMAA_022840, PMAA_053340, PMAA_085020, PMAA_045360, PMAA_022480, PMAA_054810, PMAA_040640, PMAA_037600, PMAA_002720, PMAA_016360, PMAA_039430, PMAA_018930, PMAA_047150, PMAA_063460, PMAA_005510, PMAA_026340
GO:0006790	sulfur compound metabolic process	-	0.0941838	3	95	85	7448	0.4042	50.52	PMAA_085020, PMAA_042500, PMAA_029890
GO:2000602	regulation of interphase of mitotic cell cycle	-	0.0998523	2	95	42	7448	0.417	52.54	PMAA_085020, PMAA_018930
GO:0010383	cell wall polysaccharide metabolic process	-	0.103886	2	95	43	7448	0.4258	54.08	PMAA_022840, PMAA_037600
GO:0030490	maturation of SSU-rRNA	-	0.103886	2	95	43	7448	0.4225	54.08	PMAA_045360, PMAA_002720
GO:0019318	hexose metabolic process	-	0.104522	3	95	89	7448	0.4212	54.34	PMAA_022840, PMAA_006650, PMAA_027680
GO:0009060	aerobic respiration	-	0.107963	2	95	44	7448	0.4263	55.42	PMAA_068140, PMAA_046420
GO:0000271	polysaccharide biosynthetic process	-	0.112083	2	95	45	7448	0.4424	57.96	PMAA_022840, PMAA_037600
GO:0042273	ribosomal large subunit biogenesis	-	0.112083	2	95	45	7448	0.4391	57.96	PMAA_090940, PMAA_053340
GO:0050658	RNA transport	-	0.112083	2	95	45	7448	0.4358	57.96	PMAA_016360, PMAA_026340
GO:0051236	establishment of RNA localization	-	0.112083	2	95	45	7448	0.4325	57.96	PMAA_016360, PMAA_026340
GO:0050657	nucleic acid transport	-	0.116244	2	95	46	7448	0.4467	60.3	PMAA_016360, PMAA_026340
GO:0006403	RNA localization	-	0.120444	2	95	47	7448	0.4518	61.44	PMAA_016360, PMAA_026340
GO:0042546	cell wall biogenesis	-	0.120444	2	95	47	7448	0.4485	61.44	PMAA_022840, PMAA_037600
GO:0019954	asexual reproduction	-	0.123629	3	95	96	7448	0.45	62.1	PMAA_076130, PMAA_010380, PMAA_079960
GO:0045786	negative regulation of cell cycle	-	0.132184	3	95	99	7448	0.4699	65.32	PMAA_093830, PMAA_085020, PMAA_081090
GO:0006694	steroid biosynthetic process	-	0.133261	2	95	50	7448	0.4691	65.68	PMAA_065680, PMAA_081090
GO:0034637	cellular carbohydrate biosynthetic process	-	0.133261	2	95	50	7448	0.4658	65.68	PMAA_022840, PMAA_037600
GO:0044264	cellular polysaccharide metabolic process	-	0.133261	2	95	50	7448	0.4625	65.68	PMAA_022840, PMAA_037600
GO:0010564	regulation of cell cycle process	-	0.133351	4	95	154	7448	0.4615	66	PMAA_093830, PMAA_085020, PMAA_081090, PMAA_018930
GO:0032259	methylation	-	0.133351	4	95	154	7448	0.4583	66	PMAA_032390, PMAA_063950, PMAA_015960, PMAA_039430
GO:0051726	regulation of cell cycle	-	0.133614	5	95	212	7448	0.4552	66	PMAA_093830, PMAA_085020, PMAA_081090, PMAA_063460, PMAA_018930
GO:0046483	heterocycle metabolic process	-	0.137541	9	95	465	7448	0.4632	67.62	PMAA_063950, PMAA_094650, PMAA_018930, PMAA_009290, PMAA_093830, PMAA_076130, PMAA_063460, PMAA_014300, PMAA_040230
GO:0009064	glutamine family amino acid metabolic process	-	0.137601	2	95	51	7448	0.4678	68.76	PMAA_068140, PMAA_046420
GO:0042274	ribosomal small subunit biogenesis	-	0.137601	2	95	51	7448	0.4646	68.76	PMAA_045360, PMAA_002720
GO:0048315	conidium formation	-	0.137601	2	95	51	7448	0.4615	68.76	PMAA_076130, PMAA_010380
GO:0065004	protein-DNA complex assembly	-	0.137601	2	95	51	7448	0.4584	68.76	PMAA_085020, PMAA_018930
GO:0044260	cellular macromolecule metabolic process	-	0.147774	35	95	2336	7448	0.4725	71.34	PMAA_090940, PMAA_078420, PMAA_022840, PMAA_003040, PMAA_013020, PMAA_053350, PMAA_053340, PMAA_085020, PMAA_045360, PMAA_060070, PMAA_019850, PMAA_080350, PMAA_016360, PMAA_094010, PMAA_024740, PMAA_047150, PMAA_005510, PMAA_034090, PMAA_026340, PMAA_086350, PMAA_094650, PMAA_055500, PMAA_076130, PMAA_054810, PMAA_032390, PMAA_046890, PMAA_037600, PMAA_002720, PMAA_039430, PMAA_018930, PMAA_0826…
GO:0022618	ribonucleoprotein complex assembly	-	0.150801	2	95	54	7448	0.4775	72.58	PMAA_090940, PMAA_053340
GO:0044087	regulation of cellular component biogenesis	-	0.150801	2	95	54	7448	0.4744	72.58	PMAA_085020, PMAA_037600
GO:0051168	nuclear export	-	0.150801	2	95	54	7448	0.4713	72.58	PMAA_016360, PMAA_026340
GO:XXXXXXX	unannotated	-	0.151834	20	95	1238	7448	0.4702	72.88	PMAA_096820, PMAA_039850, PMAA_092770, PMAA_045960, PMAA_028700, PMAA_084450, PMAA_057360, PMAA_032450, PMAA_093350, PMAA_001470, PMAA_070380, PMAA_069030, PMAA_081600, PMAA_053710, PMAA_010470, PMAA_070810, PMAA_078410, PMAA_086650, PMAA_006240, PMAA_063120
GO:0071826	ribonucleoprotein complex subunit organization	-	0.155257	2	95	55	7448	0.4729	73.78	PMAA_090940, PMAA_053340
GO:0045333	cellular respiration	-	0.159738	2	95	56	7448	0.4787	75.16	PMAA_068140, PMAA_046420
GO:0071824	protein-DNA complex subunit organization	-	0.159738	2	95	56	7448	0.4757	75.16	PMAA_085020, PMAA_018930
GO:0005996	monosaccharide metabolic process	-	0.162099	3	95	109	7448	0.4757	75.64	PMAA_022840, PMAA_006650, PMAA_027680
GO:0000910	cytokinesis	-	0.171449	3	95	112	7448	0.4866	77.86	PMAA_085020, PMAA_037600, PMAA_079960
GO:0009165	nucleotide biosynthetic process	-	0.174601	3	95	113	7448	0.4944	79.6	PMAA_093830, PMAA_063950, PMAA_040230
GO:0032268	regulation of cellular protein metabolic process	-	0.174601	3	95	113	7448	0.4914	79.6	PMAA_002720, PMAA_016360, PMAA_054810
GO:0034621	cellular macromolecular complex subunit organization	-	0.178293	5	95	234	7448	0.4947	80.64	PMAA_090940, PMAA_053340, PMAA_085020, PMAA_054810, PMAA_018930
GO:0071844	cellular component assembly at cellular level	-	0.179737	6	95	298	7448	0.4944	81.08	PMAA_090940, PMAA_053340, PMAA_040640, PMAA_085020, PMAA_022480, PMAA_018930
GO:0019438	aromatic compound biosynthetic process	-	0.182478	2	95	61	7448	0.4979	82.16	PMAA_009290, PMAA_014300
GO:0016310	phosphorylation	-	0.187413	6	95	302	7448	0.5054	83.9	PMAA_085020, PMAA_078420, PMAA_076130, PMAA_033130, PMAA_006650, PMAA_042500
GO:0009987	cellular process	-	0.187946	63	95	4572	7448	0.5024	83.9	PMAA_090940, PMAA_086380, PMAA_078420, PMAA_022840, PMAA_010380, PMAA_006650, PMAA_002470, PMAA_068140, PMAA_046420, PMAA_003040, PMAA_013020, PMAA_053350, PMAA_053340, PMAA_085020, PMAA_045360, PMAA_027680, PMAA_060070, PMAA_038990, PMAA_037460, PMAA_065680, PMAA_019850, PMAA_080350, PMAA_079980, PMAA_016360, PMAA_094010, PMAA_009290, PMAA_047150, PMAA_024740, PMAA_033130, PMAA_081090, PMAA_0055…
GO:0006396	RNA processing	-	0.195219	6	95	306	7448	0.5158	86.66	PMAA_032390, PMAA_045360, PMAA_047150, PMAA_005510, PMAA_002720, PMAA_039430
GO:0044036	cell wall macromolecule metabolic process	-	0.196345	2	95	64	7448	0.5149	87.02	PMAA_022840, PMAA_037600
GO:0030435	sporulation resulting in formation of a cellular spore	-	0.197098	3	95	120	7448	0.5156	87.66	PMAA_076130, PMAA_010380, PMAA_079960
Ontology Aspect: Function
GO ID	TERM	CORRECTED PVALUE	UNCORRECTED PVALUE	NUM LIST ANNOTATIONS	LIST SIZE	TOTAL NUM ANNOTATIONS	POPULATION SIZE	FDR RATE	EXPECTED FALSE POSITIVES	P. marneffei Gene Model ID
GO:0003735	structural constituent of ribosome	-	1.1673e-07	12	95	135	7448	0	0	PMAA_090940, PMAA_055500, PMAA_046890, PMAA_002720, PMAA_016360, PMAA_003040, PMAA_053340, PMAA_047150, PMAA_060070, PMAA_054240, PMAA_026340, PMAA_026430
GO:0005198	structural molecule activity	-	5.62594e-07	13	95	186	7448	0	0	PMAA_090940, PMAA_040640, PMAA_055500, PMAA_046890, PMAA_002720, PMAA_016360, PMAA_003040, PMAA_053340, PMAA_047150, PMAA_054240, PMAA_060070, PMAA_026340, PMAA_026430
GO:0004449	isocitrate dehydrogenase (NAD+) activity	-	0.000478983	2	95	3	7448	0.0467	0.14	PMAA_068140, PMAA_046420
GO:0004448	isocitrate dehydrogenase activity	-	0.000949997	2	95	4	7448	0.11	0.44	PMAA_068140, PMAA_046420
GO:XXXXXXX	unannotated	-	0.00445094	22	95	969	7448	0.312	1.56	PMAA_096820, PMAA_010380, PMAA_039850, PMAA_004760, PMAA_092770, PMAA_028700, PMAA_045360, PMAA_084450, PMAA_084780, PMAA_032450, PMAA_001470, PMAA_070380, PMAA_069030, PMAA_081600, PMAA_010470, PMAA_053710, PMAA_070810, PMAA_078410, PMAA_005510, PMAA_086650, PMAA_006240, PMAA_063120
GO:0004812	aminoacyl-tRNA ligase activity	-	0.00515465	4	95	55	7448	0.2867	1.72	PMAA_082670, PMAA_080350, PMAA_084260, PMAA_086350
GO:0016875	ligase activity, forming carbon-oxygen bonds	-	0.00515465	4	95	55	7448	0.2457	1.72	PMAA_082670, PMAA_080350, PMAA_084260, PMAA_086350
GO:0016876	ligase activity, forming aminoacyl-tRNA and related compounds	-	0.00515465	4	95	55	7448	0.215	1.72	PMAA_082670, PMAA_080350, PMAA_084260, PMAA_086350
GO:0003774	motor activity	-	0.00762918	3	95	32	7448	0.2711	2.44	PMAA_022480, PMAA_002470, PMAA_079960

## Sheet: Cluster 4
Table S7. GO associations for early and late expression clusters.
Ontology Aspect: Process
GO ID	TERM	CORRECTED PVALUE	UNCORRECTED PVALUE	NUM LIST ANNOTATIONS	LIST SIZE	TOTAL NUM ANNOTATIONS	POPULATION SIZE	FDR RATE	EXPECTED FALSE POSITIVES	P. marneffei Gene Model ID
GO:XXXXXXX	unannotated	-	3.02581e-08	33	76	1238	7448	0	0	PMAA_037620, PMAA_036120, PMAA_091910, PMAA_078310, PMAA_002420, PMAA_082250, PMAA_072760, PMAA_040470, PMAA_031980, PMAA_027290, PMAA_058900, PMAA_047990, PMAA_000930, PMAA_049510, PMAA_091310, PMAA_102280, PMAA_066510, PMAA_018660, PMAA_054400, PMAA_080010, PMAA_071490, PMAA_004050, PMAA_033630, PMAA_018860, PMAA_084700, PMAA_038320, PMAA_009820, PMAA_017080, PMAA_020770, PMAA_074850, PMAA_0077…
GO:0042402	cellular biogenic amine catabolic process	-	0.000608462	2	76	4	7448	0.16	0.32	PMAA_039450, PMAA_097060
GO:0009310	amine catabolic process	-	0.00100739	2	76	5	7448	0.2	0.6	PMAA_039450, PMAA_097060
GO:0075307	positive regulation of conidium formation	-	0.00276517	2	76	8	7448	0.35	1.4	PMAA_075300, PMAA_075980
GO:0015074	DNA integration	-	0.00350482	6	76	145	7448	0.328	1.64	PMAA_038970, PMAA_008200, PMAA_090390, PMAA_015590, PMAA_007590, PMAA_015580
GO:0009074	aromatic amino acid family catabolic process	-	0.00745262	2	76	13	7448	0.74	4.44	PMAA_031950, PMAA_097060
GO:0016125	sterol metabolic process	-	0.0082416	3	76	41	7448	0.6571	4.6	PMAA_024520, PMAA_002910, PMAA_002930
GO:0009063	cellular amino acid catabolic process	-	0.0106567	3	76	45	7448	0.7425	5.94	PMAA_031950, PMAA_016000, PMAA_097060
GO:0019439	aromatic compound catabolic process	-	0.0112412	2	76	16	7448	0.7067	6.36	PMAA_031950, PMAA_097060
GO:0043938	positive regulation of sporulation	-	0.0173368	2	76	20	7448	0.95	9.5	PMAA_075300, PMAA_075980
GO:0006696	ergosterol biosynthetic process	-	0.022636	2	76	23	7448	1	11	PMAA_002910, PMAA_002930
GO:0016129	phytosteroid biosynthetic process	-	0.022636	2	76	23	7448	0.985	11.82	PMAA_002910, PMAA_002930
GO:0044108	cellular alcohol biosynthetic process	-	0.022636	2	76	23	7448	0.9092	11.82	PMAA_002910, PMAA_002930
GO:0008204	ergosterol metabolic process	-	0.0245328	2	76	24	7448	0.9186	12.86	PMAA_002910, PMAA_002930
GO:0016128	phytosteroid metabolic process	-	0.0245328	2	76	24	7448	0.8573	12.86	PMAA_002910, PMAA_002930
GO:0044107	cellular alcohol metabolic process	-	0.0245328	2	76	24	7448	0.8038	12.86	PMAA_002910, PMAA_002930
GO:0006576	cellular biogenic amine metabolic process	-	0.0264923	2	76	25	7448	0.8141	13.84	PMAA_039450, PMAA_097060
GO:0016126	sterol biosynthetic process	-	0.0285131	2	76	26	7448	0.8178	14.72	PMAA_002910, PMAA_002930
GO:0075306	regulation of conidium formation	-	0.0285131	2	76	26	7448	0.7747	14.72	PMAA_075300, PMAA_075980
GO:0008202	steroid metabolic process	-	0.0306929	3	76	67	7448	0.783	15.66	PMAA_024520, PMAA_002910, PMAA_002930
GO:0016054	organic acid catabolic process	-	0.0318797	3	76	68	7448	0.7724	16.22	PMAA_031950, PMAA_016000, PMAA_097060
GO:0046395	carboxylic acid catabolic process	-	0.0318797	3	76	68	7448	0.7373	16.22	PMAA_031950, PMAA_016000, PMAA_097060
GO:0034305	regulation of asexual sporulation	-	0.0394877	2	76	31	7448	0.8539	19.64	PMAA_075300, PMAA_075980
GO:0000096	sulfur amino acid metabolic process	-	0.0467205	2	76	34	7448	1	24	PMAA_016000, PMAA_024760
GO:0044282	small molecule catabolic process	-	0.0494511	3	76	81	7448	1	25	PMAA_031950, PMAA_016000, PMAA_097060
GO:0043937	regulation of sporulation	-	0.0597449	2	76	39	7448	1	26	PMAA_075300, PMAA_075980
GO:0046165	alcohol biosynthetic process	-	0.0597449	2	76	39	7448	1	27	PMAA_002910, PMAA_002930
GO:0008219	cell death	-	0.0624845	2	76	40	7448	1	28	PMAA_102650, PMAA_075300
GO:0016265	death	-	0.0624845	2	76	40	7448	1	29	PMAA_102650, PMAA_075300
GO:0009072	aromatic amino acid family metabolic process	-	0.0767925	2	76	45	7448	1	30	PMAA_031950, PMAA_097060
GO:0051094	positive regulation of developmental process	-	0.0767925	2	76	45	7448	1	31	PMAA_075300, PMAA_075980
GO:0006694	steroid biosynthetic process	-	0.0920203	2	76	50	7448	1	32	PMAA_002910, PMAA_002930
GO:0044106	cellular amine metabolic process	-	0.095165	2	76	51	7448	1	33	PMAA_039450, PMAA_097060
GO:0048315	conidium formation	-	0.095165	2	76	51	7448	1	34	PMAA_075300, PMAA_075980
GO:0019748	secondary metabolic process	-	0.10478	2	76	54	7448	1	35	PMAA_002910, PMAA_002930
GO:0006520	cellular amino acid metabolic process	-	0.113427	6	76	325	7448	1	36	PMAA_046930, PMAA_031950, PMAA_016000, PMAA_039450, PMAA_024760, PMAA_097060
GO:0006278	RNA-dependent DNA replication	-	0.121355	2	76	59	7448	1	37	PMAA_082600, PMAA_007590
GO:0009308	amine metabolic process	-	0.128157	2	76	61	7448	1	38	PMAA_039450, PMAA_097060
GO:0006066	alcohol metabolic process	-	0.151621	3	76	132	7448	1	39	PMAA_024520, PMAA_002910, PMAA_002930
GO:0030436	asexual sporulation	-	0.18158	2	76	76	7448	1	40	PMAA_075300, PMAA_075980
GO:0006259	DNA metabolic process	-	0.186236	8	76	542	7448	1	41	PMAA_038970, PMAA_008200, PMAA_015360, PMAA_082600, PMAA_090390, PMAA_007590, PMAA_015590, PMAA_015580
Ontology Aspect: Function
GO ID	TERM	CORRECTED PVALUE	UNCORRECTED PVALUE	NUM LIST ANNOTATIONS	LIST SIZE	TOTAL NUM ANNOTATIONS	POPULATION SIZE	FDR RATE	EXPECTED FALSE POSITIVES	P. marneffei Gene Model ID
GO:XXXXXXX	unannotated	-	5.75188e-09	30	76	969	7448	0	0	PMAA_037620, PMAA_036120, PMAA_091910, PMAA_054400, PMAA_071490, PMAA_080010, PMAA_078310, PMAA_002420, PMAA_082250, PMAA_020600, PMAA_033630, PMAA_018860, PMAA_072760, PMAA_040470, PMAA_031980, PMAA_058900, PMAA_038320, PMAA_092380, PMAA_047990, PMAA_000930, PMAA_009820, PMAA_017080, PMAA_020770, PMAA_074850, PMAA_049510, PMAA_091310, PMAA_102280, PMAA_075980, PMAA_091290, PMAA_007760
GO:0019842	vitamin binding	-	0.0475992	4	76	134	7448	1	2	PMAA_046930, PMAA_097060, PMAA_035040, PMAA_002930
GO:0016702	oxidoreductase activity, acting on single donors with incorporation of molecular oxygen, incorporation of two atoms of oxygen	-	0.0983406	2	76	52	7448	1	3	PMAA_031950, PMAA_024760
GO:0003964	RNA-directed DNA polymerase activity	-	0.108043	2	76	55	7448	1	4	PMAA_082600, PMAA_007590
GO:0016701	oxidoreductase activity, acting on single donors with incorporation of molecular oxygen	-	0.117989	2	76	58	7448	1	5	PMAA_031950, PMAA_024760
GO:0051213	dioxygenase activity	-	0.152621	2	76	68	7448	1	6	PMAA_031950, PMAA_024760
GO:0034061	DNA polymerase activity	-	0.166987	2	76	72	7448	1	7	PMAA_082600, PMAA_007590

## Sheet: Cluster 5
Table S7. GO associations for early and late expression clusters.
Ontology Aspect: Process
GO ID	TERM	CORRECTED PVALUE	UNCORRECTED PVALUE	NUM LIST ANNOTATIONS	LIST SIZE	TOTAL NUM ANNOTATIONS	POPULATION SIZE	FDR RATE	EXPECTED FALSE POSITIVES	P. marneffei Gene Model ID
GO:0006083	acetate metabolic process	-	0.00055095	2	19	14	7448	1	1	PMAA_068520, PMAA_032350
GO:XXXXXXX	unannotated	-	0.00177038	9	19	1238	7448	1	2	PMAA_062660, PMAA_054200, PMAA_019810, PMAA_051480, PMAA_049950, PMAA_016820, PMAA_051400, PMAA_025700, PMAA_072910
GO:0009073	aromatic amino acid family biosynthetic process	-	0.00274346	2	19	31	7448	0.8467	2.54	PMAA_021280, PMAA_097070
GO:0009072	aromatic amino acid family metabolic process	-	0.00571807	2	19	45	7448	0.89	3.56	PMAA_021280, PMAA_097070
GO:0019438	aromatic compound biosynthetic process	-	0.0103165	2	19	61	7448	0.932	4.66	PMAA_021280, PMAA_097070
GO:0019752	carboxylic acid metabolic process	-	0.027091	4	19	463	7448	1	6	PMAA_068520, PMAA_032350, PMAA_021280, PMAA_097070
GO:0043436	oxoacid metabolic process	-	0.027091	4	19	463	7448	1	7	PMAA_068520, PMAA_032350, PMAA_021280, PMAA_097070
GO:0006082	organic acid metabolic process	-	0.0274735	4	19	465	7448	0.93	7.44	PMAA_068520, PMAA_032350, PMAA_021280, PMAA_097070
GO:0042180	cellular ketone metabolic process	-	0.0298383	4	19	477	7448	0.8467	7.62	PMAA_068520, PMAA_032350, PMAA_021280, PMAA_097070
GO:0032787	monocarboxylic acid metabolic process	-	0.0379477	2	19	122	7448	0.888	8.88	PMAA_068520, PMAA_032350
GO:0006520	cellular amino acid metabolic process	-	0.0475043	3	19	325	7448	0.9309	10.24	PMAA_068520, PMAA_021280, PMAA_097070
GO:0006725	cellular aromatic compound metabolic process	-	0.0544329	2	19	149	7448	0.92	11.04	PMAA_021280, PMAA_097070
GO:0008652	cellular amino acid biosynthetic process	-	0.0638259	2	19	163	7448	0.9338	12.14	PMAA_021280, PMAA_097070
GO:0071702	organic substance transport	-	0.0708539	2	19	173	7448	0.91	12.74	PMAA_068520, PMAA_059270
GO:0016053	organic acid biosynthetic process	-	0.106951	2	19	220	7448	1	15	PMAA_021280, PMAA_097070
GO:0046394	carboxylic acid biosynthetic process	-	0.106951	2	19	220	7448	1	16	PMAA_021280, PMAA_097070
GO:0044283	small molecule biosynthetic process	-	0.151476	2	19	272	7448	1	17	PMAA_021280, PMAA_097070
GO:0016310	phosphorylation	-	0.178709	2	19	302	7448	1	18	PMAA_093490, PMAA_032350
Ontology Aspect: Function
GO ID	TERM	CORRECTED PVALUE	UNCORRECTED PVALUE	NUM LIST ANNOTATIONS	LIST SIZE	TOTAL NUM ANNOTATIONS	POPULATION SIZE	FDR RATE	EXPECTED FALSE POSITIVES	P. marneffei Gene Model ID
GO:0004833	tryptophan 2,3-dioxygenase activity	-	6.16602e-06	2	19	2	7448	0	0	PMAA_021280, PMAA_097070
GO:XXXXXXX	unannotated	-	0.00751629	7	19	969	7448	0.56	1.12	PMAA_016820, PMAA_025700, PMAA_051400, PMAA_062660, PMAA_054200, PMAA_051480, PMAA_049950
GO:0016702	oxidoreductase activity, acting on single donors with incorporation of molecular oxygen, incorporation of two atoms of oxygen	-	0.00757786	2	19	52	7448	0.42	1.26	PMAA_021280, PMAA_097070
GO:0016701	oxidoreductase activity, acting on single donors with incorporation of molecular oxygen	-	0.00936109	2	19	58	7448	0.34	1.36	PMAA_021280, PMAA_097070
GO:0051213	dioxygenase activity	-	0.0127066	2	19	68	7448	0.368	1.84	PMAA_021280, PMAA_097070
GO:0020037	heme binding	-	0.0666064	2	19	167	7448	0.7667	4.6	PMAA_021280, PMAA_097070
GO:0046906	tetrapyrrole binding	-	0.0673079	2	19	168	7448	0.6629	4.64	PMAA_021280, PMAA_097070
GO:0005506	iron ion binding	-	0.106951	2	19	220	7448	0.92	7.36	PMAA_021280, PMAA_097070
